# Supplementary material
Source: publisher site journal article supplement (https://www.spandidos-publications.com/6696/downloadSupplementary)
Supplement: Supplementary file 1 [file downloadSupplementary]

## Sheet: Table S1
Table SI. List of all expressed genes.
ensembl_name	before-patient1	after-patient1	before-patient2	after-patient2	before-patient3	after-patient2	Means	before_Means	after_Means	log2FC	t_test_pvalue	FDR	external_gene_name	description
ENSG00000124596	304.876	231.465	255.081	180.236	300.235	227.457	249.892	286.731	213.052	-0.428489	6.89e-05	0.680167	OARD1	O-acyl-ADP-ribose deacylase 1 [Source:HGNC Symbol;Acc:HGNC:21257]
ENSG00000146859	11.4329	18.0832	12.1024	18.8306	11.6699	18.1241	15.0405	11.7351	18.3459	0.644636	0.000152056	0.680167	TMEM140	transmembrane protein 140 [Source:HGNC Symbol;Acc:HGNC:21870]
ENSG00000183260	22.8657	12.0554	22.3429	11.657	21.218	9.96823	16.6846	22.1422	11.2269	-0.979839	0.000245491	0.680167	ABHD16B	abhydrolase domain containing 16B [Source:HGNC Symbol;Acc:HGNC:16128]
ENSG00000074276	6.66917	8.43881	2.79286	4.48347	1.0609	2.71861	4.36064	3.50764	5.21363	0.571786	0.000378808	0.680167	CDHR2	cadherin related family member 2 [Source:HGNC Symbol;Acc:HGNC:18231]
ENSG00000258430	123.856	91.6214	115.438	82.4959	144.283	108.744	111.073	127.859	94.2872	-0.439419	0.00089356	0.680167	AL583722.2	novel transcript, antisense to AKT1
ENSG00000006047	0.952739	0	2.79286	1.79339	1.0609	0	1.09998	1.60217	0.597797	-1.4223	0.000970984	0.680167	YBX2	Y-box binding protein 2 [Source:HGNC Symbol;Acc:HGNC:17948]
ENSG00000139044	0.952739	0	2.79286	1.79339	1.0609	0	1.09998	1.60217	0.597797	-1.4223	0.000970984	0.680167	B4GALNT3	beta-1,4-N-acetyl-galactosaminyltransferase 3 [Source:HGNC Symbol;Acc:HGNC:24137]
ENSG00000015676	2.85822	3.61663	1.86191	2.69008	1.0609	1.81241	2.31669	1.92701	2.70637	0.489999	0.000985718	0.680167	NUDCD3	NudC domain containing 3 [Source:HGNC Symbol;Acc:HGNC:22208]
ENSG00000107819	0.952739	0	1.86191	0.896695	1.0609	0	0.795373	1.29185	0.298898	-2.11171	0.00118181	0.680167	SFXN3	sideroflexin 3 [Source:HGNC Symbol;Acc:HGNC:16087]
ENSG00000125505	0.952739	0	1.86191	0.896695	1.0609	0	0.795373	1.29185	0.298898	-2.11171	0.00118181	0.680167	MBOAT7	membrane bound O-acyltransferase domain containing 7 [Source:HGNC Symbol;Acc:HGNC:15505]
ENSG00000139546	0.952739	0	1.86191	0.896695	1.0609	0	0.795373	1.29185	0.298898	-2.11171	0.00118181	0.680167	TARBP2	TARBP2 subunit of RISC loading complex [Source:HGNC Symbol;Acc:HGNC:11569]
ENSG00000205867	1.90548	0	3.72381	1.79339	2.1218	0	1.59075	2.5837	0.597797	-2.11171	0.00118181	0.680167	KRTAP5-2	keratin associated protein 5-2 [Source:HGNC Symbol;Acc:HGNC:23597]
ENSG00000231172	0.952739	0	1.86191	0.896695	1.0609	0	0.795373	1.29185	0.298898	-2.11171	0.00118181	0.680167	AC007099.1	novel transcript, antisense to EVA1A
ENSG00000266998	0.952739	0	1.86191	0.896695	1.0609	0	0.795373	1.29185	0.298898	-2.11171	0.00118181	0.680167	AC111182.1	novel transcript, antisense to SEPT9
ENSG00000186814	4.7637	8.43881	3.72381	7.17356	4.2436	8.15583	6.08322	4.2437	7.92273	0.900674	0.00131453	0.680167	ZSCAN30	zinc finger and SCAN domain containing 30 [Source:HGNC Symbol;Acc:HGNC:33517]
ENSG00000256069	0.952739	0	4.65477	3.58678	1.0609	0	1.7092	2.2228	1.19559	-0.894653	0.00131532	0.680167	A2MP1	alpha-2-macroglobulin pseudogene 1 [Source:HGNC Symbol;Acc:HGNC:8]
ENSG00000242602	1.90548	0	2.79286	0.896695	2.1218	0	1.28614	2.27338	0.298898	-2.92711	0.00139069	0.680167	AC008953.1	ribosomal protein L35a (RPL35A) pseudogene
ENSG00000273724	1.90548	0	2.79286	0.896695	2.1218	0	1.28614	2.27338	0.298898	-2.92711	0.00139069	0.680167	AC106782.4	carbonic anhydrase VA, mitochondrial (CA5A) pseudogene
ENSG00000282917	422.063	276.07	471.062	342.537	521.963	380.605	402.384	471.696	333.071	-0.502029	0.00141742	0.680167	AC107068.2	novel transcript, antisense to CORIN and NFXL1
ENSG00000273398	63.8335	90.4158	73.5453	96.843	66.8368	91.5265	80.5002	68.0719	92.9285	0.449062	0.00146315	0.680167	AC017083.3	novel protein
ENSG00000152942	32.3931	42.1941	25.1357	34.9711	21.218	29.9047	30.9695	26.249	35.69	0.443258	0.00159318	0.680167	RAD17	RAD17 checkpoint clamp loader component [Source:HGNC Symbol;Acc:HGNC:9807]
ENSG00000010270	0.952739	0	0.930953	0	1.0609	0	0.490765	0.981531	0	NA	0.00167157	0.680167	STARD3NL	STARD3 N-terminal like [Source:HGNC Symbol;Acc:HGNC:19169]
ENSG00000072958	0.952739	0	0.930953	0	1.0609	0	0.490765	0.981531	0	NA	0.00167157	0.680167	AP1M1	adaptor related protein complex 1 subunit mu 1 [Source:HGNC Symbol;Acc:HGNC:13667]
ENSG00000075785	0.952739	0	0.930953	0	1.0609	0	0.490765	0.981531	0	NA	0.00167157	0.680167	RAB7A	RAB7A, member RAS oncogene family [Source:HGNC Symbol;Acc:HGNC:9788]
ENSG00000113368	0.952739	0	0.930953	0	1.0609	0	0.490765	0.981531	0	NA	0.00167157	0.680167	LMNB1	lamin B1 [Source:HGNC Symbol;Acc:HGNC:6637]
ENSG00000131966	0.952739	0	0.930953	0	1.0609	0	0.490765	0.981531	0	NA	0.00167157	0.680167	ACTR10	actin related protein 10 [Source:HGNC Symbol;Acc:HGNC:17372]
ENSG00000136816	1.90548	0	1.86191	0	2.1218	0	0.981531	1.96306	0	NA	0.00167157	0.680167	TOR1B	torsin family 1 member B [Source:HGNC Symbol;Acc:HGNC:11995]
ENSG00000233851	1.90548	0	1.86191	0	2.1218	0	0.981531	1.96306	0	NA	0.00167157	0.680167	LATS2-AS1	LATS2 antisense RNA 1 [Source:HGNC Symbol;Acc:HGNC:39912]
ENSG00000267755	0.952739	0	0.930953	0	1.0609	0	0.490765	0.981531	0	NA	0.00167157	0.680167	AC005329.2	novel transcript, antisense to MUM1
ENSG00000280721	0.952739	0	0.930953	0	1.0609	0	0.490765	0.981531	0	NA	0.00167157	0.680167	LINC01943	long intergenic non-protein coding RNA 1943 [Source:HGNC Symbol;Acc:HGNC:52767]
ENSG00000130985	2.85822	1.20554	2.79286	0.896695	5.3045	3.62481	2.78044	3.65186	1.90902	-0.935801	0.00194909	0.680167	UBA1	ubiquitin like modifier activating enzyme 1 [Source:HGNC Symbol;Acc:HGNC:12469]
ENSG00000272345	11.4329	15.6721	7.44762	11.657	4.2436	9.06203	9.91921	7.70803	12.1304	0.65419	0.00200313	0.680167	AL031775.1	novel transcript, antisense to ACOT13
ENSG00000188107	96.2266	127.788	102.405	130.021	68.9586	101.495	104.482	89.1967	119.768	0.425178	0.00241205	0.680167	EYS	eyes shut homolog [Source:HGNC Symbol;Acc:HGNC:21555]
ENSG00000280334	2.85822	6.02772	0.930953	4.48347	4.2436	7.24963	4.29893	2.67759	5.92027	1.14473	0.00248497	0.680167	AC009084.2	TEC
ENSG00000127452	1.90548	3.61663	0	1.79339	2.1218	3.62481	2.17702	1.34243	3.01161	1.16569	0.0026693	0.680167	FBXL12	F-box and leucine rich repeat protein 12 [Source:HGNC Symbol;Acc:HGNC:13611]
ENSG00000148672	14.2911	40.9885	17.6881	47.5248	14.8526	39.8729	29.203	15.6106	42.7954	1.45493	0.00268534	0.680167	GLUD1	glutamate dehydrogenase 1 [Source:HGNC Symbol;Acc:HGNC:4335]
ENSG00000253457	9.52739	20.4943	17.6881	26.9008	12.7308	23.5613	18.4838	13.3154	23.6521	0.82887	0.00295714	0.680167	SMIM18	small integral membrane protein 18 [Source:HGNC Symbol;Acc:HGNC:42973]
ENSG00000151023	7.62191	21.6998	17.6881	29.5909	5.3045	17.2179	16.5205	10.2048	22.8362	1.16207	0.00326269	0.680167	ENKUR	enkurin, TRPC channel interacting protein [Source:HGNC Symbol;Acc:HGNC:28388]
ENSG00000174437	3.81096	1.20554	5.58572	2.69008	3.1827	0	2.74583	4.19313	1.29854	-1.69113	0.00329828	0.680167	ATP2A2	ATPase sarcoplasmic/endoplasmic reticulum Ca2+ transporting 2 [Source:HGNC Symbol;Acc:HGNC:812]
ENSG00000237505	14.2911	4.82218	22.3429	10.7603	18.0353	7.24963	12.9169	18.2231	7.61071	-1.25966	0.00335531	0.680167	PKN2-AS1	PKN2 antisense RNA 1 [Source:HGNC Symbol;Acc:HGNC:50597]
ENSG00000244932	65.739	40.9885	67.0286	44.8347	80.6285	53.466	58.7809	71.132	46.4297	-0.61545	0.00335541	0.680167	AL449212.1	pseudogene similar to intraflagellar transport 122 homolog
ENSG00000223583	12.3856	16.8776	11.1714	16.1405	11.6699	17.2179	14.2438	11.7423	16.7453	0.512042	0.00370302	0.680167	AL513365.1	ribosomal protein L17 (RPL17) pseudogene
ENSG00000140945	0.952739	2.41109	2.79286	4.48347	0	1.81241	2.07543	1.24853	2.90232	1.21697	0.00392024	0.680167	CDH13	cadherin 13 [Source:HGNC Symbol;Acc:HGNC:1753]
ENSG00000111445	12.3856	19.2887	15.8262	21.5207	2.1218	9.06203	13.3675	10.1112	16.6238	0.717296	0.00392473	0.680167	RFC5	replication factor C subunit 5 [Source:HGNC Symbol;Acc:HGNC:9973]
ENSG00000070366	5.71643	18.0832	8.37858	20.624	5.3045	15.4055	12.252	6.46651	18.0375	1.47994	0.00402011	0.680167	SMG6	SMG6 nonsense mediated mRNA decay factor [Source:HGNC Symbol;Acc:HGNC:17809]
ENSG00000227542	10.4801	15.6721	8.37858	12.5537	9.54811	14.4993	11.8553	9.46894	14.2417	0.588845	0.00410611	0.680167	AC092614.1	novel transcript
ENSG00000115687	0.952739	2.41109	0.930953	2.69008	0	1.81241	1.46621	0.627897	2.30453	1.87587	0.00429364	0.680167	PASK	PAS domain containing serine/threonine kinase [Source:HGNC Symbol;Acc:HGNC:17270]
ENSG00000214102	1.90548	9.64436	2.79286	12.5537	4.2436	12.6868	7.30448	2.98065	11.6283	1.96394	0.00466284	0.680167	WEE2	WEE2 oocyte meiosis inhibiting kinase [Source:HGNC Symbol;Acc:HGNC:19684]
ENSG00000267207	106.707	125.377	134.988	149.748	112.455	128.681	126.326	118.05	134.602	0.189298	0.00471404	0.680167	AC005884.1	novel transcript, antisense to BCAS3
ENSG00000157653	40.015	60.2772	30.7215	48.4215	33.9488	49.8412	43.8709	34.8951	52.8466	0.598787	0.00495001	0.680167	C9orf43	chromosome 9 open reading frame 43 [Source:HGNC Symbol;Acc:HGNC:23570]
ENSG00000178803	57.1643	21.6998	53.0643	25.1075	64.715	34.4357	42.6978	58.3145	27.081	-1.10658	0.00501038	0.680167	ADORA2A-AS1	ADORA2A antisense RNA 1 [Source:HGNC Symbol;Acc:HGNC:37122]
ENSG00000188033	175.304	128.993	185.26	146.161	145.343	108.744	148.301	168.636	127.966	-0.398146	0.00508593	0.680167	ZNF490	zinc finger protein 490 [Source:HGNC Symbol;Acc:HGNC:23705]
ENSG00000076770	0.952739	4.82218	3.72381	7.17356	4.2436	7.24963	4.69425	2.97338	6.41512	1.10937	0.00520495	0.680167	MBNL3	muscleblind like splicing regulator 3 [Source:HGNC Symbol;Acc:HGNC:20564]
ENSG00000258520	1.90548	13.261	18.6191	28.6942	4.2436	17.2179	13.9902	8.25605	19.7244	1.25646	0.0053069	0.680167	AL359317.1	novel transcript
ENSG00000180448	5.71643	1.20554	7.44762	3.58678	11.6699	8.15583	6.29702	8.27799	4.31605	-0.939569	0.00539387	0.680167	AC004151.1	Rho GTPase activating protein 45 [Source:NCBI gene;Acc:23526]
ENSG00000230427	7.62191	15.6721	17.6881	27.7975	5.3045	13.593	14.6129	10.2048	19.0209	0.898331	0.00539772	0.680167	ALG14-AS1	ALG14 antisense RNA 1 [Source:HGNC Symbol;Acc:HGNC:41192]
ENSG00000141449	47.637	38.5774	32.5834	21.5207	48.8014	37.1543	37.7124	43.0072	32.4175	-0.407808	0.00542949	0.680167	GREB1L	GREB1 like retinoic acid receptor coactivator [Source:HGNC Symbol;Acc:HGNC:31042]
ENSG00000254981	4.7637	0	5.58572	1.79339	8.48721	3.62481	4.04247	6.27887	1.80607	-1.79765	0.00577652	0.680167	NA	NA
ENSG00000116604	0.952739	0	2.79286	1.79339	2.1218	0.906203	1.42783	1.9558	0.899864	-1.11998	0.00582761	0.680167	MEF2D	myocyte enhancer factor 2D [Source:HGNC Symbol;Acc:HGNC:6997]
ENSG00000145375	0.952739	0	2.79286	1.79339	2.1218	0.906203	1.42783	1.9558	0.899864	-1.11998	0.00582761	0.680167	SPATA5	spermatogenesis associated 5 [Source:HGNC Symbol;Acc:HGNC:18119]
ENSG00000182095	0.952739	0	2.79286	1.79339	2.1218	0.906203	1.42783	1.9558	0.899864	-1.11998	0.00582761	0.680167	TNRC18	trinucleotide repeat containing 18 [Source:HGNC Symbol;Acc:HGNC:11962]
ENSG00000278505	15.2438	8.43881	14.8952	8.07025	18.0353	12.6868	12.895	16.0581	9.73197	-0.7225	0.00591906	0.680167	C17orf78	chromosome 17 open reading frame 78 [Source:HGNC Symbol;Acc:HGNC:26831]
ENSG00000267735	49.5424	62.6883	39.1	51.1116	24.4007	34.4357	43.5465	37.6811	49.4119	0.391018	0.00595011	0.680167	AC020934.2	novel transcript, antisense to DNASE2
ENSG00000234983	1.90548	0	4.65477	2.69008	4.2436	1.81241	2.55106	3.60128	1.50083	-1.26275	0.00620665	0.680167	AC010132.2	serine/threonine kinase receptor associated protein (STRAP) pseudogene
ENSG00000166971	3.81096	7.23327	1.86191	6.27686	0	3.62481	3.8013	1.89095	5.71165	1.59479	0.00622354	0.680167	AKTIP	AKT interacting protein [Source:HGNC Symbol;Acc:HGNC:16710]
ENSG00000236991	8.57465	4.82218	4.65477	1.79339	3.1827	0	3.83795	5.47071	2.20519	-1.31082	0.00630597	0.680167	EDRF1-AS1	EDRF1 antisense RNA 1 [Source:HGNC Symbol;Acc:HGNC:49501]
ENSG00000143621	1.90548	13.261	5.58572	14.3471	4.2436	15.4055	9.12473	3.9116	14.3379	1.874	0.00634225	0.680167	ILF2	interleukin enhancer binding factor 2 [Source:HGNC Symbol;Acc:HGNC:6037]
ENSG00000235189	504.952	531.645	575.329	597.199	460.431	489.35	526.484	513.571	539.398	0.0707874	0.00642606	0.680167	AL034405.1	novel transcript
ENSG00000177082	46.6842	54.2495	37.2381	44.8347	46.6796	52.5598	47.041	43.534	50.548	0.215512	0.00647164	0.680167	WDR73	WD repeat domain 73 [Source:HGNC Symbol;Acc:HGNC:25928]
ENSG00000111877	70.5027	110.91	60.5119	99.5331	30.7661	61.6218	72.3076	53.9269	90.6883	0.749912	0.00650657	0.680167	MCM9	minichromosome maintenance 9 homologous recombination repair factor [Source:HGNC Symbol;Acc:HGNC:21484]
ENSG00000271647	16.1966	3.61663	14.8952	0.896695	22.2789	11.7806	11.6108	17.7902	5.43132	-1.71171	0.00669648	0.680167	KRT8P47	keratin 8 pseudogene 47 [Source:HGNC Symbol;Acc:HGNC:44461]
ENSG00000261294	21.913	31.3442	11.1714	21.5207	15.9135	23.5613	20.904	16.3326	25.4754	0.641344	0.00744054	0.680167	AC120498.6	novel transcript, antisense to CACNA1H
ENSG00000158828	56.2116	40.9885	85.6477	74.4257	65.7759	52.5598	62.6015	69.2117	55.9913	-0.305813	0.00754655	0.680167	PINK1	PTEN induced kinase 1 [Source:HGNC Symbol;Acc:HGNC:14581]
ENSG00000095970	0.952739	0	0.930953	0	2.1218	0.906203	0.818616	1.33516	0.302068	-2.14407	0.00774782	0.680167	TREM2	triggering receptor expressed on myeloid cells 2 [Source:HGNC Symbol;Acc:HGNC:17761]
ENSG00000119778	0.952739	0	0.930953	0	2.1218	0.906203	0.818616	1.33516	0.302068	-2.14407	0.00774782	0.680167	ATAD2B	ATPase family AAA domain containing 2B [Source:HGNC Symbol;Acc:HGNC:29230]
ENSG00000186487	0.952739	0	0.930953	0	2.1218	0.906203	0.818616	1.33516	0.302068	-2.14407	0.00774782	0.680167	MYT1L	myelin transcription factor 1 like [Source:HGNC Symbol;Acc:HGNC:7623]
ENSG00000216863	3.81096	0	2.79286	0	5.3045	1.81241	2.28679	3.96944	0.604135	-2.71599	0.00788748	0.680167	LY86-AS1	LY86 antisense RNA 1 [Source:HGNC Symbol;Acc:HGNC:26593]
ENSG00000215009	17.1493	14.4665	19.55	16.1405	5.3045	2.71861	12.5549	14.0013	11.1086	-0.333887	0.00797592	0.680167	ACSM4	acyl-CoA synthetase medium chain family member 4 [Source:HGNC Symbol;Acc:HGNC:32016]
ENSG00000163001	8.57465	14.4665	3.72381	11.657	11.6699	18.1241	11.3693	7.98946	14.7492	0.884468	0.00801313	0.680167	CFAP36	cilia and flagella associated protein 36 [Source:HGNC Symbol;Acc:HGNC:30540]
ENSG00000067704	3.81096	0	2.79286	0	3.1827	0	1.63109	3.26217	0	NA	0.00816406	0.680167	IARS2	isoleucyl-tRNA synthetase 2, mitochondrial [Source:HGNC Symbol;Acc:HGNC:29685]
ENSG00000151353	2.85822	0	3.72381	0.896695	2.1218	0	1.60009	2.90128	0.298898	-3.27896	0.0084297	0.680167	TMEM18	transmembrane protein 18 [Source:HGNC Symbol;Acc:HGNC:25257]
ENSG00000107443	3.81096	16.8776	4.65477	15.2438	3.1827	18.1241	10.3157	3.88281	16.7485	2.10886	0.00946159	0.680167	CCNJ	cyclin J [Source:HGNC Symbol;Acc:HGNC:23434]
ENSG00000119397	38.1096	51.8384	32.5834	48.4215	35.0097	46.2164	42.0298	35.2342	48.8254	0.470656	0.0095639	0.680167	CNTRL	centriolin [Source:HGNC Symbol;Acc:HGNC:1858]
ENSG00000235677	40.015	27.7275	28.8595	17.9339	36.0706	20.8427	28.5749	34.9817	22.168	-0.658121	0.00967384	0.680167	NPM1P26	nucleophosmin 1 pseudogene 26 [Source:HGNC Symbol;Acc:HGNC:45205]
ENSG00000142606	4.7637	1.20554	5.58572	0.896695	5.3045	1.81241	3.26143	5.21797	1.30488	-1.99957	0.00971034	0.680167	MMEL1	membrane metalloendopeptidase like 1 [Source:HGNC Symbol;Acc:HGNC:14668]
ENSG00000085563	2.85822	8.43881	1.86191	8.07025	1.0609	5.43722	4.62122	1.92701	7.31543	1.92458	0.00980486	0.680167	ABCB1	ATP binding cassette subfamily B member 1 [Source:HGNC Symbol;Acc:HGNC:40]
ENSG00000055609	20.0075	15.6721	21.4119	15.2438	11.6699	6.34342	15.0581	17.6964	12.4198	-0.510821	0.00992482	0.680167	KMT2C	lysine methyltransferase 2C [Source:HGNC Symbol;Acc:HGNC:13726]
ENSG00000059122	0	1.20554	0	0.896695	0	0.906203	0.501407	0	1.00281	NA	0.0100706	0.680167	FLYWCH1	FLYWCH-type zinc finger 1 [Source:HGNC Symbol;Acc:HGNC:25404]
ENSG00000107290	0	1.20554	0	0.896695	0	0.906203	0.501407	0	1.00281	NA	0.0100706	0.680167	SETX	senataxin [Source:HGNC Symbol;Acc:HGNC:445]
ENSG00000122224	0	2.41109	0	1.79339	0	1.81241	1.00281	0	2.00563	NA	0.0100706	0.680167	LY9	lymphocyte antigen 9 [Source:HGNC Symbol;Acc:HGNC:6730]
ENSG00000130300	0	2.41109	0	1.79339	0	1.81241	1.00281	0	2.00563	NA	0.0100706	0.680167	PLVAP	plasmalemma vesicle associated protein [Source:HGNC Symbol;Acc:HGNC:13635]
ENSG00000134910	0	1.20554	0	0.896695	0	0.906203	0.501407	0	1.00281	NA	0.0100706	0.680167	STT3A	STT3 oligosaccharyltransferase complex catalytic subunit A [Source:HGNC Symbol;Acc:HGNC:6172]
ENSG00000142864	0	1.20554	0	0.896695	0	0.906203	0.501407	0	1.00281	NA	0.0100706	0.680167	SERBP1	SERPINE1 mRNA binding protein 1 [Source:HGNC Symbol;Acc:HGNC:17860]
ENSG00000159197	0	2.41109	0	1.79339	0	1.81241	1.00281	0	2.00563	NA	0.0100706	0.680167	KCNE2	potassium voltage-gated channel subfamily E regulatory subunit 2 [Source:HGNC Symbol;Acc:HGNC:6242]
ENSG00000167291	0	1.20554	0	0.896695	0	0.906203	0.501407	0	1.00281	NA	0.0100706	0.680167	TBC1D16	TBC1 domain family member 16 [Source:HGNC Symbol;Acc:HGNC:28356]
ENSG00000182667	0	1.20554	0	0.896695	0	0.906203	0.501407	0	1.00281	NA	0.0100706	0.680167	NTM	neurotrimin [Source:HGNC Symbol;Acc:HGNC:17941]
ENSG00000204740	0	2.41109	0	1.79339	0	1.81241	1.00281	0	2.00563	NA	0.0100706	0.680167	MALRD1	MAM and LDL receptor class A domain containing 1 [Source:HGNC Symbol;Acc:HGNC:24331]
ENSG00000220871	0	1.20554	0	0.896695	0	0.906203	0.501407	0	1.00281	NA	0.0100706	0.680167	DNAJC19P6	DnaJ heat shock protein family (Hsp40) member C19 pseudogene 6 [Source:HGNC Symbol;Acc:HGNC:45069]
ENSG00000233338	0	1.20554	0	0.896695	0	0.906203	0.501407	0	1.00281	NA	0.0100706	0.680167	TLR8-AS1	TLR8 antisense RNA 1 [Source:HGNC Symbol;Acc:HGNC:40720]
ENSG00000235547	0	1.20554	0	0.896695	0	0.906203	0.501407	0	1.00281	NA	0.0100706	0.680167	NDUFB11P1	NADH:ubiquinone oxidoreductase subunit B11 pseudogene 1 [Source:HGNC Symbol;Acc:HGNC:33980]
ENSG00000255345	0	1.20554	0	0.896695	0	0.906203	0.501407	0	1.00281	NA	0.0100706	0.680167	AP002957.1	novel transcript
ENSG00000271049	0	1.20554	0	0.896695	0	0.906203	0.501407	0	1.00281	NA	0.0100706	0.680167	AC020910.4	small nuclear ribonucleoprotein polypeptide E (SNRPE) pseudogene
ENSG00000273010	0	2.41109	0	1.79339	0	1.81241	1.00281	0	2.00563	NA	0.0100706	0.680167	AL360270.3	novel transcript, antisense to LRIF1
ENSG00000124571	16.1966	22.9053	24.2048	32.281	16.9744	22.6551	22.5362	19.1253	25.9471	0.440097	0.010187	0.680167	XPO5	exportin 5 [Source:HGNC Symbol;Acc:HGNC:17675]
ENSG00000256928	25.724	3.61663	23.2738	4.48347	33.9488	7.24963	16.3827	27.6489	5.11658	-2.43397	0.0101976	0.680167	AP000763.4	novel transcript
ENSG00000248724	28.5822	34.9608	26.0667	31.3843	35.0097	42.5915	33.0992	29.8862	36.3122	0.280976	0.010201	0.680167	NPHP3-AS1	NPHP3 antisense RNA 1 [Source:HGNC Symbol;Acc:HGNC:24129]
ENSG00000077721	79.0773	65.0994	80.9929	64.562	67.8977	48.0288	67.6097	75.9893	59.2301	-0.359467	0.010233	0.680167	UBE2A	ubiquitin conjugating enzyme E2 A [Source:HGNC Symbol;Acc:HGNC:12472]
ENSG00000250692	0	3.61663	5.58572	10.7603	1.0609	5.43722	4.41013	2.21554	6.60473	1.57584	0.0103393	0.680167	AC008667.2	novel transcript
ENSG00000247287	58.1171	66.305	46.5477	55.5951	45.6187	57.0908	54.8791	50.0945	59.6636	0.252199	0.0103947	0.680167	AL359220.1	novel transcript, antisense to PRKCH
ENSG00000173517	0	2.41109	0	1.79339	1.0609	3.62481	1.4817	0.353634	2.60976	2.88359	0.0107242	0.680167	PEAK1	pseudopodium enriched atypical kinase 1 [Source:HGNC Symbol;Acc:HGNC:29431]
ENSG00000254604	646.91	522.001	615.36	507.529	816.894	662.434	628.521	693.054	563.988	-0.297304	0.0109534	0.680167	AP002336.2	novel transcript
ENSG00000100478	67.6445	59.0717	62.3739	50.2149	65.7759	56.1846	60.2109	65.2647	55.1571	-0.242758	0.0109597	0.680167	AP4S1	adaptor related protein complex 4 subunit sigma 1 [Source:HGNC Symbol;Acc:HGNC:575]
ENSG00000144749	13.3383	1.20554	16.7572	7.17356	21.218	12.6868	12.0632	17.1045	7.02198	-1.28443	0.0110595	0.680167	LRIG1	leucine rich repeats and immunoglobulin like domains 1 [Source:HGNC Symbol;Acc:HGNC:17360]
ENSG00000255441	56.2116	21.6998	54.9262	24.2108	68.9586	45.3102	45.2195	60.0321	30.4069	-0.981336	0.0113479	0.680167	AC008750.2	novel transcript, antisense to SIGLEC10
ENSG00000041802	0.952739	3.61663	0.930953	3.58678	0	3.62481	2.11865	0.627897	3.60941	2.52316	0.0114397	0.680167	LSG1	large 60S subunit nuclear export GTPase 1 [Source:HGNC Symbol;Acc:HGNC:25652]
ENSG00000222046	40.9678	21.6998	46.5477	32.281	64.715	50.7474	42.8264	50.7435	34.9094	-0.539606	0.0115833	0.680167	DCDC2B	doublecortin domain containing 2B [Source:HGNC Symbol;Acc:HGNC:32576]
ENSG00000167550	0	1.20554	0.930953	1.79339	0	0.906203	0.806015	0.310318	1.30171	2.06859	0.0116216	0.680167	RHEBL1	RHEB like 1 [Source:HGNC Symbol;Acc:HGNC:21166]
ENSG00000116793	1.90548	1.20554	2.79286	1.79339	5.3045	4.53102	2.92213	3.33428	2.50998	-0.409698	0.0117436	0.680167	PHTF1	putative homeodomain transcription factor 1 [Source:HGNC Symbol;Acc:HGNC:8939]
ENSG00000114757	4.7637	1.20554	4.65477	0.896695	5.3045	2.71861	3.2573	4.90765	1.60695	-1.61071	0.0118178	0.680167	PEX5L	peroxisomal biogenesis factor 5 like [Source:HGNC Symbol;Acc:HGNC:30024]
ENSG00000089060	25.724	33.7552	20.481	26.9008	18.0353	23.5613	24.7429	21.4134	28.0725	0.390641	0.0119023	0.680167	SLC8B1	solute carrier family 8 member B1 [Source:HGNC Symbol;Acc:HGNC:26175]
ENSG00000270820	260.098	385.774	293.25	381.095	236.581	333.483	315.047	263.31	366.784	0.478171	0.011931	0.680167	AC016727.1	novel transcript, antisense to XPO1
ENSG00000247498	51.4479	42.1941	38.1691	28.6942	44.5578	31.7171	39.4634	44.7249	34.2018	-0.387007	0.0119454	0.680167	GPRC5D-AS1	GPRC5D and HEBP1 antisense RNA 1 [Source:HGNC Symbol;Acc:HGNC:53599]
ENSG00000106245	5.71643	10.8499	6.51667	11.657	6.3654	9.96823	8.51228	6.1995	10.8251	0.80415	0.0120022	0.680167	BUD31	BUD31 homolog [Source:HGNC Symbol;Acc:HGNC:29629]
ENSG00000038002	1.90548	4.82218	4.65477	8.96695	0	3.62481	3.9957	2.18675	5.80465	1.40842	0.0121731	0.680167	AGA	aspartylglucosaminidase [Source:HGNC Symbol;Acc:HGNC:318]
ENSG00000163795	19.0548	36.1663	23.2738	34.9711	25.4616	41.6853	30.1022	22.5967	37.6076	0.734909	0.012245	0.680167	ZNF513	zinc finger protein 513 [Source:HGNC Symbol;Acc:HGNC:26498]
ENSG00000214783	18.102	25.3164	11.1714	17.0372	28.6443	33.5295	22.3002	19.3059	25.2944	0.389773	0.0124743	0.680167	POLR2J4	RNA polymerase II subunit J4, pseudogene [Source:HGNC Symbol;Acc:HGNC:28195]
ENSG00000160766	30.4876	12.0554	25.1357	1.79339	28.6443	12.6868	18.4672	28.0892	8.84523	-1.66705	0.0124793	0.680167	GBAP1	glucosylceramidase beta pseudogene 1 [Source:HGNC Symbol;Acc:HGNC:4178]
ENSG00000166402	0.952739	3.61663	4.65477	7.17356	0	1.81241	3.03502	1.86917	4.20087	1.16829	0.0124849	0.680167	TUB	TUB bipartite transcription factor [Source:HGNC Symbol;Acc:HGNC:12406]
ENSG00000278662	0.952739	8.43881	0.930953	8.96695	6.3654	11.7806	6.23925	2.7497	9.7288	1.82299	0.0128194	0.680167	GOLGA6L10	golgin A6 family like 10 [Source:HGNC Symbol;Acc:HGNC:37228]
ENSG00000104154	34.2986	16.8776	23.2738	0	18.0353	1.81241	15.7163	25.2026	6.23001	-2.01627	0.0129265	0.680167	SLC30A4	solute carrier family 30 member 4 [Source:HGNC Symbol;Acc:HGNC:11015]
ENSG00000231840	569.738	681.133	587.431	744.257	569.704	684.183	639.408	575.624	703.191	0.288789	0.0129446	0.680167	AC073342.1	novel transcript
ENSG00000241560	20.9603	37.3719	20.481	31.3843	24.4007	38.0605	28.7764	21.9473	35.6056	0.698059	0.0132842	0.680167	ZBTB20-AS1	ZBTB20 antisense RNA 1 [Source:HGNC Symbol;Acc:HGNC:40640]
ENSG00000196459	1.90548	3.61663	4.65477	7.17356	5.3045	7.24963	4.98409	3.95492	6.01327	0.604503	0.0133154	0.680167	TRAPPC2	trafficking protein particle complex 2 [Source:HGNC Symbol;Acc:HGNC:23068]
ENSG00000261777	355.372	402.652	381.691	426.827	396.777	461.257	404.096	377.946	430.245	0.186978	0.0134279	0.680167	AC012184.3	novel transcript, antisense to DDX19B and DDX19A
ENSG00000132153	8.57465	8.43881	5.58572	5.38017	7.42631	7.24963	7.10921	7.19556	7.02287	-0.0350462	0.0134369	0.680167	DHX30	DExH-box helicase 30 [Source:HGNC Symbol;Acc:HGNC:16716]
ENSG00000093072	0	1.20554	1.86191	2.69008	0	0.906203	1.11062	0.620635	1.60061	1.3668	0.0134956	0.680167	ADA2	adenosine deaminase 2 [Source:HGNC Symbol;Acc:HGNC:1839]
ENSG00000123838	0	1.20554	1.86191	2.69008	0	0.906203	1.11062	0.620635	1.60061	1.3668	0.0134956	0.680167	C4BPA	complement component 4 binding protein alpha [Source:HGNC Symbol;Acc:HGNC:1325]
ENSG00000180263	0	1.20554	1.86191	2.69008	0	0.906203	1.11062	0.620635	1.60061	1.3668	0.0134956	0.680167	FGD6	FYVE, RhoGEF and PH domain containing 6 [Source:HGNC Symbol;Acc:HGNC:21740]
ENSG00000260650	1.90548	0	2.79286	0	2.1218	0	1.13669	2.27338	0	NA	0.0135286	0.680167	AC010542.1	novel transcript
ENSG00000169981	1.90548	1.20554	0.930953	0	1.0609	0	0.850479	1.29911	0.401848	-1.6928	0.0135586	0.680167	ZNF35	zinc finger protein 35 [Source:HGNC Symbol;Acc:HGNC:13099]
ENSG00000165209	1.90548	6.02772	0.930953	4.48347	1.0609	6.34342	3.45866	1.29911	5.61821	2.11259	0.0136063	0.680167	STRBP	spermatid perinuclear RNA binding protein [Source:HGNC Symbol;Acc:HGNC:16462]
ENSG00000274570	4.7637	10.8499	8.37858	14.3471	4.2436	12.6868	9.21162	5.79529	12.628	1.12367	0.0136315	0.680167	SPDYE10P	speedy/RINGO cell cycle regulator family member E10, pseudogene [Source:HGNC Symbol;Acc:HGNC:51506]
ENSG00000133858	12.3856	19.2887	21.4119	26.0042	18.0353	24.4675	20.2655	17.2776	23.2534	0.428541	0.0136354	0.680167	ZFC3H1	zinc finger C3H1-type containing [Source:HGNC Symbol;Acc:HGNC:28328]
ENSG00000253837	4016.75	2859.55	2438.17	832.133	3599.64	1855	2600.21	3351.52	1848.89	-0.858152	0.0136364	0.680167	AC090197.1	novel transcript
ENSG00000110921	64.7863	89.2103	43.7548	71.7356	37.1315	73.4025	63.3368	48.5575	78.1161	0.685925	0.0138073	0.680167	MVK	mevalonate kinase [Source:HGNC Symbol;Acc:HGNC:7530]
ENSG00000171132	1.90548	1.20554	1.86191	0.896695	1.0609	0	1.15509	1.60943	0.700746	-1.19958	0.0138256	0.680167	PRKCE	protein kinase C epsilon [Source:HGNC Symbol;Acc:HGNC:9401]
ENSG00000271937	1.90548	1.20554	1.86191	0.896695	1.0609	0	1.15509	1.60943	0.700746	-1.19958	0.0138256	0.680167	AC104187.1	novel transcript, antisense to TCAIM
ENSG00000257568	48.5897	54.2495	35.3762	43.938	51.9841	58.9032	48.8401	45.3167	52.3636	0.208522	0.0139188	0.680167	AC079035.1	novel transcript, antisense to MON2
ENSG00000237655	40.015	56.6606	34.4453	52.0083	31.827	43.4978	43.0757	35.4291	50.7222	0.517683	0.0140253	0.680167	AC073834.1	novel transcript, antisense to TTC30A
ENSG00000171459	1.90548	6.02772	1.86191	5.38017	6.3654	9.06203	5.10045	3.3776	6.82331	1.01447	0.014073	0.680167	OR1L6	olfactory receptor family 1 subfamily L member 6 [Source:HGNC Symbol;Acc:HGNC:8218]
ENSG00000109390	2.85822	6.02772	3.72381	8.07025	4.2436	7.24963	5.36221	3.60854	7.11587	0.979623	0.0141833	0.680167	NDUFC1	NADH:ubiquinone oxidoreductase subunit C1 [Source:HGNC Symbol;Acc:HGNC:7705]
ENSG00000214761	25.724	19.2887	20.481	10.7603	21.218	13.593	18.5108	22.4743	14.5474	-0.627519	0.014362	0.680167	HNRNPA1P15	heterogeneous nuclear ribonucleoprotein A1 pseudogene 15 [Source:HGNC Symbol;Acc:HGNC:39133]
ENSG00000240868	0	2.41109	0	3.58678	0	2.71861	1.45275	0	2.90549	NA	0.0143635	0.680167	C1QTNF9-AS1	C1QTNF9 antisense RNA 1 [Source:HGNC Symbol;Acc:HGNC:39906]
ENSG00000199405	4.7637	0	4.65477	0	3.1827	0	2.10019	4.20039	0	NA	0.0144137	0.680167	SNORA1B	small nucleolar RNA, H/ACA box 1B [Source:HGNC Symbol;Acc:HGNC:52193]
ENSG00000243829	1.90548	6.02772	1.86191	8.07025	4.2436	9.06203	5.19517	2.67033	7.72	1.53158	0.014428	0.680167	AC011495.1	ribosomal protein S9 (RPS9) pseudogene
ENSG00000178150	816.497	575.045	730.798	573.885	881.609	681.465	709.883	809.635	610.131	-0.408151	0.0146383	0.680167	ZNF114	zinc finger protein 114 [Source:HGNC Symbol;Acc:HGNC:12894]
ENSG00000139899	35.2513	31.3442	31.6524	26.0042	40.3142	36.2481	33.4691	35.7393	31.1988	-0.196021	0.0146536	0.680167	CBLN3	cerebellin 3 precursor [Source:HGNC Symbol;Acc:HGNC:20146]
ENSG00000177932	6.66917	10.8499	0	3.58678	6.3654	11.7806	6.54198	4.34486	8.73911	1.00818	0.0146886	0.680167	ZNF354C	zinc finger protein 354C [Source:HGNC Symbol;Acc:HGNC:16736]
ENSG00000227620	1.90548	3.61663	1.86191	4.48347	4.2436	6.34342	3.74242	2.67033	4.81451	0.850371	0.0147956	0.680167	ALG1L8P	ALG1 like 8, pseudogene [Source:HGNC Symbol;Acc:HGNC:44377]
ENSG00000228237	524.959	690.777	627.462	734.393	471.04	610.781	609.902	541.154	678.65	0.32663	0.0150073	0.680167	EFCAB14-AS1	EFCAB14 antisense RNA 1 [Source:HGNC Symbol;Acc:HGNC:44108]
ENSG00000118985	0	1.20554	0	1.79339	0	1.81241	0.80189	0	1.60378	NA	0.0150782	0.680167	ELL2	elongation factor for RNA polymerase II 2 [Source:HGNC Symbol;Acc:HGNC:17064]
ENSG00000148123	0	1.20554	0	1.79339	0	1.81241	0.80189	0	1.60378	NA	0.0150782	0.680167	PLPPR1	phospholipid phosphatase related 1 [Source:HGNC Symbol;Acc:HGNC:25993]
ENSG00000232202	0	1.20554	0	1.79339	0	1.81241	0.80189	0	1.60378	NA	0.0150782	0.680167	AC098824.1	istidine-rich domain (CHORD)-containing 1 (CHORDC1) pseudogene
ENSG00000237872	49.5424	36.1663	61.4429	46.6281	59.4104	49.8412	50.5052	56.7986	44.2119	-0.361421	0.0151072	0.680167	POU5F1P4	POU class 5 homeobox 1 pseudogene 4 [Source:HGNC Symbol;Acc:HGNC:33310]
ENSG00000213606	1.90548	1.20554	3.72381	2.69008	1.0609	0	1.7643	2.23006	1.29854	-0.780191	0.0151705	0.680167	AKR1B10P1	aldo-keto reductase family 1 member B10 pseudogene 1 [Source:HGNC Symbol;Acc:HGNC:45062]
ENSG00000101384	32.3931	18.0832	22.3429	7.17356	18.0353	8.15583	17.6973	24.2571	11.1375	-1.12298	0.0152496	0.680167	JAG1	jagged canonical Notch ligand 1 [Source:HGNC Symbol;Acc:HGNC:6188]
ENSG00000167705	5.71643	0	3.72381	0	6.3654	0.906203	2.78531	5.26855	0.302068	-4.12446	0.0155067	0.680167	RILP	Rab interacting lysosomal protein [Source:HGNC Symbol;Acc:HGNC:30266]
ENSG00000250027	1.90548	0	4.65477	1.79339	2.1218	0	1.74591	2.89402	0.597797	-2.27535	0.0155153	0.680167	AC022272.1	novel transcript
ENSG00000167625	30.4876	19.2887	29.7905	12.5537	25.4616	9.06203	21.1074	28.5799	13.6348	-1.06771	0.0155967	0.680167	ZNF526	zinc finger protein 526 [Source:HGNC Symbol;Acc:HGNC:29415]
ENSG00000251314	299.16	426.763	739.177	840.203	93.3593	251.018	441.613	377.232	505.995	0.42367	0.01576	0.680167	AC104123.1	novel transcript, antisense to PCSK1
ENSG00000080573	13.3383	14.4665	5.58572	7.17356	12.7308	14.4993	11.299	10.5516	12.0464	0.191143	0.0158698	0.680167	COL5A3	collagen type V alpha 3 chain [Source:HGNC Symbol;Acc:HGNC:14864]
ENSG00000083307	0.952739	4.82218	0	5.38017	0	3.62481	2.46332	0.31758	4.60905	3.85928	0.0159693	0.680167	GRHL2	grainyhead like transcription factor 2 [Source:HGNC Symbol;Acc:HGNC:2799]
ENSG00000225855	584.029	675.105	478.51	553.261	484.832	542.816	553.092	515.79	590.394	0.194893	0.0160046	0.680167	RUSC1-AS1	RUSC1 antisense RNA 1 [Source:HGNC Symbol;Acc:HGNC:26680]
ENSG00000184669	0.952739	6.02772	6.51667	12.5537	2.1218	9.96823	6.35682	3.19707	9.51656	1.57369	0.0161282	0.680167	OR7E14P	olfactory receptor family 7 subfamily E member 14 pseudogene [Source:HGNC Symbol;Acc:HGNC:8385]
ENSG00000142892	23.8185	28.9331	32.5834	36.7645	21.218	24.4675	27.9641	25.8733	30.055	0.216143	0.0161765	0.680167	PIGK	phosphatidylinositol glycan anchor biosynthesis class K [Source:HGNC Symbol;Acc:HGNC:8965]
ENSG00000237080	24.7712	34.9608	25.1357	41.248	24.4007	38.0605	31.4295	24.7692	38.0898	0.620855	0.0162325	0.680167	EHMT2-AS1	EHMT2 and SLC44A4 antisense RNA 1 [Source:HGNC Symbol;Acc:HGNC:39751]
ENSG00000188828	1.90548	6.02772	0	4.48347	1.0609	7.24963	3.45453	0.988793	5.92027	2.58192	0.0162892	0.680167	GLRA4	glycine receptor alpha 4 [Source:HGNC Symbol;Acc:HGNC:31715]
ENSG00000228010	391.576	332.73	384.484	295.013	335.245	269.142	334.698	370.435	298.962	-0.309258	0.0163044	0.680167	AC073343.2	novel transcript, antisense to ZNF12
ENSG00000130203	0	2.41109	0	3.58678	1.0609	3.62481	1.7806	0.353634	3.20756	3.18115	0.0163157	0.680167	APOE	apolipoprotein E [Source:HGNC Symbol;Acc:HGNC:613]
ENSG00000112964	0	2.41109	1.86191	4.48347	0	3.62481	2.06355	0.620635	3.50646	2.4982	0.0164234	0.680167	GHR	growth hormone receptor [Source:HGNC Symbol;Acc:HGNC:4263]
ENSG00000244926	32.3931	51.8384	40.9619	58.2852	40.3142	52.5598	46.0588	37.8898	54.2278	0.517224	0.0166658	0.680167	ALKBH3-AS1	ALKBH3 antisense RNA 1 [Source:HGNC Symbol;Acc:HGNC:48670]
ENSG00000000460	2375.18	910.186	1456.01	443.864	2297.91	693.245	1362.73	2043.03	682.432	-1.58196	0.0168403	0.680167	C1orf112	chromosome 1 open reading frame 112 [Source:HGNC Symbol;Acc:HGNC:25565]
ENSG00000269968	3466.06	4237.49	3238.79	4220.74	3669.66	4292.68	3854.24	3458.17	4250.31	0.297558	0.0168449	0.680167	AC006064.4	novel transcript, antisense to GAPDH
ENSG00000158863	5.71643	4.82218	2.79286	1.79339	3.1827	1.81241	3.35333	3.89733	2.80932	-0.472263	0.0171567	0.680167	FAM160B2	family with sequence similarity 160 member B2 [Source:HGNC Symbol;Acc:HGNC:16492]
ENSG00000171466	15.2438	20.4943	1.86191	5.38017	5.3045	10.8744	9.85985	7.47008	12.2496	0.713542	0.0173214	0.680167	ZNF562	zinc finger protein 562 [Source:HGNC Symbol;Acc:HGNC:25950]
ENSG00000213889	66.6917	42.1941	83.7858	46.6281	70.0195	43.4978	58.8028	73.499	44.1066	-0.736728	0.017381	0.680167	PPM1N	protein phosphatase, Mg2+/Mn2+ dependent 1N (putative) [Source:HGNC Symbol;Acc:HGNC:26845]
ENSG00000106244	897.48	763.11	527.85	443.864	874.182	766.648	712.189	766.504	657.874	-0.220483	0.0174828	0.680167	PDAP1	PDGFA associated protein 1 [Source:HGNC Symbol;Acc:HGNC:14634]
ENSG00000066032	0.952739	3.61663	2.79286	4.48347	1.0609	3.62481	2.75524	1.60217	3.90831	1.28652	0.0174964	0.680167	CTNNA2	catenin alpha 2 [Source:HGNC Symbol;Acc:HGNC:2510]
ENSG00000280832	57.1643	67.5105	40.031	56.4918	56.2277	68.8714	57.7161	51.141	64.2912	0.330141	0.0178963	0.680167	GSEC	G-quadruplex forming sequence containing lncRNA [Source:HGNC Symbol;Acc:HGNC:48645]
ENSG00000248916	0	1.20554	3.72381	4.48347	0	0.906203	1.71984	1.24127	2.19841	0.824641	0.018279	0.680167	NUP210P3	nucleoporin 210 pseudogene 3 [Source:HGNC Symbol;Acc:HGNC:42712]
ENSG00000213707	21.913	12.0554	19.55	13.4504	15.9135	8.15583	15.173	19.1255	11.2206	-0.769353	0.0183995	0.680167	HMGB1P10	high mobility group box 1 pseudogene 10 [Source:HGNC Symbol;Acc:HGNC:4994]
ENSG00000171189	71.4554	50.6329	71.6834	51.1116	116.699	86.0893	74.6119	86.6126	62.6113	-0.468155	0.0184386	0.680167	GRIK1	glutamate ionotropic receptor kainate type subunit 1 [Source:HGNC Symbol;Acc:HGNC:4579]
ENSG00000254010	1.90548	6.02772	7.44762	12.5537	9.54811	12.6868	8.36158	6.3004	10.4228	0.726222	0.0184562	0.680167	NA	NA
ENSG00000265794	55.2589	63.8939	68.8905	79.8058	72.1413	86.0893	71.0133	65.4302	76.5963	0.227318	0.0184685	0.680167	AC005899.5	novel transcript
ENSG00000228274	30.4876	45.8107	18.6191	35.8678	22.2789	46.2164	33.2134	23.7952	42.6316	0.841253	0.018669	0.680167	AL021707.2	novel transcript, antisense to CBY1
ENSG00000213892	3.81096	4.82218	7.44762	8.96695	5.3045	6.34342	6.11594	5.52103	6.71085	0.281558	0.0186815	0.680167	CEACAM16	CEA cell adhesion molecule 16, tectorial membrane component [Source:HGNC Symbol;Acc:HGNC:31948]
ENSG00000261336	3.81096	6.02772	4.65477	8.07025	2.1218	4.53102	4.86942	3.52917	6.20966	0.815185	0.0186891	0.680167	EIF4BP5	eukaryotic translation initiation factor 4B pseudogene 5 [Source:HGNC Symbol;Acc:HGNC:37938]
ENSG00000100994	41.9205	59.0717	54.9262	66.3554	40.3142	58.9032	53.5819	45.7203	61.4434	0.426423	0.0187985	0.680167	PYGB	glycogen phosphorylase B [Source:HGNC Symbol;Acc:HGNC:9723]
ENSG00000260091	85.7465	60.2772	152.676	130.021	249.312	213.864	148.649	162.578	134.721	-0.271163	0.0188622	0.680167	AC093752.3	novel transcript
ENSG00000248487	6.66917	3.61663	8.37858	6.27686	13.7917	11.7806	8.41893	9.61315	7.22471	-0.41207	0.018898	0.680167	ABHD14A	abhydrolase domain containing 14A [Source:HGNC Symbol;Acc:HGNC:24538]
ENSG00000227071	9.52739	6.02772	7.44762	2.69008	8.48721	2.71861	6.14977	8.48741	3.81214	-1.15472	0.0191402	0.680167	FOCAD-AS1	FOCAD antisense RNA 1 [Source:HGNC Symbol;Acc:HGNC:49789]
ENSG00000272814	29.5349	36.1663	20.481	28.6942	40.3142	45.3102	33.4168	30.11	36.7236	0.286462	0.0191586	0.680167	AC093732.2	novel transcript
ENSG00000100304	0	1.20554	0	0.896695	1.0609	1.81241	0.829258	0.353634	1.30488	1.88359	0.0192378	0.680167	TTLL12	tubulin tyrosine ligase like 12 [Source:HGNC Symbol;Acc:HGNC:28974]
ENSG00000113360	0	1.20554	0	0.896695	1.0609	1.81241	0.829258	0.353634	1.30488	1.88359	0.0192378	0.680167	DROSHA	drosha ribonuclease III [Source:HGNC Symbol;Acc:HGNC:17904]
ENSG00000254636	0	2.41109	0	1.79339	2.1218	3.62481	1.65852	0.707267	2.60976	1.88359	0.0192378	0.680167	ARMS2	age-related maculopathy susceptibility 2 [Source:HGNC Symbol;Acc:HGNC:32685]
ENSG00000237027	0.952739	3.61663	0.930953	2.69008	0	1.81241	1.66714	0.627897	2.70637	2.10776	0.0193131	0.680167	AL159174.1	novel transcript
ENSG00000228816	28.5822	18.0832	31.6524	14.3471	31.827	16.3117	23.4673	30.6872	16.2473	-0.917436	0.0193262	0.680167	AK3P5	adenylate kinase 3 pseudogene 5 [Source:HGNC Symbol;Acc:HGNC:39064]
ENSG00000121879	2.85822	7.23327	10.2405	16.1405	6.3654	13.593	9.40515	6.48804	12.3223	0.925415	0.0193756	0.680167	PIK3CA	phosphatidylinositol-4,5-bisphosphate 3-kinase catalytic subunit alpha [Source:HGNC Symbol;Acc:HGNC:8975]
ENSG00000117616	0.952739	9.64436	2.79286	8.07025	2.1218	9.06203	5.44067	1.9558	8.92555	2.19018	0.0194209	0.680167	RSRP1	arginine and serine rich protein 1 [Source:HGNC Symbol;Acc:HGNC:25234]
ENSG00000108469	7.62191	3.61663	18.6191	12.5537	9.54811	5.43722	9.56611	11.9297	7.20253	-0.727982	0.0194902	0.680167	RECQL5	RecQ like helicase 5 [Source:HGNC Symbol;Acc:HGNC:9950]
ENSG00000251158	95.2739	59.0717	94.9572	71.7356	56.2277	30.8109	68.0128	82.153	53.8727	-0.608757	0.0195321	0.680167	AC131392.2	POM121 membrane glycoprotein-like (POM121L1) pseudogene
ENSG00000272100	59.0698	75.9493	53.0643	65.4587	58.3495	68.8714	63.4605	56.8279	70.0932	0.302674	0.0196256	0.680167	AL513218.1	novel transcript, antisense to CC2D1B
ENSG00000146457	10.4801	4.82218	11.1714	1.79339	14.8526	7.24963	8.3949	12.1681	4.62173	-1.39659	0.0196696	0.680167	WTAP	WT1 associated protein [Source:HGNC Symbol;Acc:HGNC:16846]
ENSG00000005187	177.209	233.876	159.193	235.831	141.1	188.49	189.283	159.167	219.399	0.463011	0.0199141	0.680167	ACSM3	acyl-CoA synthetase medium chain family member 3 [Source:HGNC Symbol;Acc:HGNC:10522]
ENSG00000204850	0.952739	3.61663	0.930953	3.58678	1.0609	2.71861	2.14444	0.981531	3.30734	1.75257	0.0200127	0.680167	AC011484.1	novel transcript, antisense to PPP5D1
ENSG00000173917	1.90548	3.61663	2.79286	4.48347	1.0609	3.62481	2.91403	1.91975	3.90831	1.02563	0.0203015	0.680167	HOXB2	homeobox B2 [Source:HGNC Symbol;Acc:HGNC:5113]
ENSG00000250384	25.724	16.8776	17.6881	9.86364	23.3398	10.8744	17.3946	22.2506	12.5386	-0.827473	0.0203749	0.680167	UBE2CP3	ubiquitin conjugating enzyme E2 C pseudogene 3 [Source:HGNC Symbol;Acc:HGNC:43552]
ENSG00000204323	0	1.20554	0.930953	1.79339	1.0609	1.81241	1.13387	0.663951	1.60378	1.27233	0.0204969	0.680167	SMIM5	small integral membrane protein 5 [Source:HGNC Symbol;Acc:HGNC:40030]
ENSG00000227053	0	1.20554	0.930953	1.79339	1.0609	1.81241	1.13387	0.663951	1.60378	1.27233	0.0204969	0.680167	MUC12-AS1	MUC12 antisense RNA 1 [Source:HGNC Symbol;Acc:HGNC:40382]
ENSG00000230749	64.7863	28.9331	40.9619	8.07025	62.5931	10.8744	36.0365	56.1138	15.9593	-1.81396	0.0205377	0.680167	MEIS1-AS2	MEIS1 antisense RNA 2 [Source:HGNC Symbol;Acc:HGNC:40370]
ENSG00000165480	0	7.23327	3.72381	9.86364	0	9.96823	5.13149	1.24127	9.02172	2.86158	0.0207488	0.680167	SKA3	spindle and kinetochore associated complex subunit 3 [Source:HGNC Symbol;Acc:HGNC:20262]
ENSG00000214827	92.4157	120.554	120.093	167.682	101.846	143.18	124.295	104.785	143.805	0.456686	0.0209094	0.680167	MTCP1	mature T cell proliferation 1 [Source:HGNC Symbol;Acc:HGNC:7423]
ENSG00000187151	0.952739	4.82218	2.79286	5.38017	1.0609	5.43722	3.40768	1.60217	5.21319	1.70214	0.0210507	0.680167	ANGPTL5	angiopoietin like 5 [Source:HGNC Symbol;Acc:HGNC:19705]
ENSG00000160781	0.952739	2.41109	0	1.79339	2.1218	4.53102	1.96834	1.02485	2.91183	1.50652	0.0210888	0.680167	PAQR6	progestin and adipoQ receptor family member 6 [Source:HGNC Symbol;Acc:HGNC:30132]
ENSG00000182257	4.7637	0	5.58572	2.69008	5.3045	1.81241	3.3594	5.21797	1.50083	-1.79773	0.0212649	0.680167	PRR34	PRR34 long non-coding RNA [Source:HGNC Symbol;Acc:HGNC:25606]
ENSG00000183826	9.52739	6.02772	8.37858	3.58678	15.9135	9.96823	8.90037	11.2732	6.52758	-0.788272	0.0214453	0.680167	BTBD9	BTB domain containing 9 [Source:HGNC Symbol;Acc:HGNC:21228]
ENSG00000180104	1.90548	1.20554	11.1714	10.7603	4.2436	3.62481	5.4852	5.77351	5.1969	-0.151797	0.0215322	0.680167	EXOC3	exocyst complex component 3 [Source:HGNC Symbol;Acc:HGNC:30378]
ENSG00000102145	0.952739	2.41109	0.930953	1.79339	3.1827	4.53102	2.30031	1.6888	2.91183	0.78593	0.0216809	0.680167	GATA1	GATA binding protein 1 [Source:HGNC Symbol;Acc:HGNC:4170]
ENSG00000174038	182.926	137.432	139.643	112.984	178.231	141.368	148.764	166.933	130.594	-0.354179	0.0217102	0.680167	C9orf131	chromosome 9 open reading frame 131 [Source:HGNC Symbol;Acc:HGNC:31418]
ENSG00000089775	130.525	224.231	149.883	237.624	128.369	183.959	175.765	136.259	215.272	0.659804	0.0217152	0.680167	ZBTB25	zinc finger and BTB domain containing 25 [Source:HGNC Symbol;Acc:HGNC:13112]
ENSG00000177340	0	1.20554	1.86191	2.69008	1.0609	1.81241	1.43847	0.974269	1.90268	0.96564	0.0220905	0.680167	AC024940.1	novel transcript, antisense to FAM60A
ENSG00000100982	4.7637	2.41109	2.79286	0.896695	3.1827	1.81241	2.64324	3.57975	1.70673	-1.06862	0.0221974	0.680167	PCIF1	PDX1 C-terminal inhibiting factor 1 [Source:HGNC Symbol;Acc:HGNC:16200]
ENSG00000129194	7.62191	4.82218	6.51667	4.48347	5.3045	3.62481	5.39559	6.48103	4.31016	-0.588483	0.0224118	0.680167	SOX15	SRY-box transcription factor 15 [Source:HGNC Symbol;Acc:HGNC:11196]
ENSG00000105329	326.789	315.853	309.076	295.909	319.331	311.734	313.115	318.399	307.832	-0.0486929	0.022664	0.680167	TGFB1	transforming growth factor beta 1 [Source:HGNC Symbol;Acc:HGNC:11766]
ENSG00000108262	0.952739	6.02772	0	6.27686	0	3.62481	2.81369	0.31758	5.3098	4.06347	0.0227835	0.680167	GIT1	GIT ArfGAP 1 [Source:HGNC Symbol;Acc:HGNC:4272]
ENSG00000267449	3.81096	0	8.37858	1.79339	9.54811	3.62481	4.52597	7.24588	1.80607	-2.00431	0.0228416	0.680167	AC005884.2	novel transcript, antisense to BCAS3
ENSG00000133243	37.1568	20.4943	22.3429	9.86364	73.2022	51.6536	35.7856	44.234	27.3372	-0.694291	0.0232217	0.680167	BTBD2	BTB domain containing 2 [Source:HGNC Symbol;Acc:HGNC:15504]
ENSG00000223611	0	1.20554	0.930953	1.79339	2.1218	3.62481	1.61275	1.01758	2.20792	1.11754	0.0233317	0.680167	SUPT20HL2	SUPT20H like 2 [Source:HGNC Symbol;Acc:HGNC:31797]
ENSG00000110876	5.71643	2.41109	10.2405	4.48347	12.7308	8.15583	7.28969	9.56258	5.0168	-0.930633	0.023402	0.680167	SELPLG	selectin P ligand [Source:HGNC Symbol;Acc:HGNC:10722]
ENSG00000233998	1.90548	0	2.79286	0	4.2436	0.906203	1.64136	2.98065	0.302068	-3.30268	0.0234207	0.680167	SETP5	SET pseudogene 5 [Source:HGNC Symbol;Acc:HGNC:42924]
ENSG00000136367	6.66917	9.64436	13.9643	16.1405	19.0962	20.8427	14.3929	13.2432	15.5425	0.230965	0.0236483	0.680167	ZFHX2	zinc finger homeobox 2 [Source:HGNC Symbol;Acc:HGNC:20152]
ENSG00000258452	1.90548	3.61663	1.86191	4.48347	1.0609	2.71861	2.60783	1.60943	3.60624	1.16395	0.0236654	0.680167	AC022404.1	high mobility group nucleosomal binding domain 2 (HMGN2) pseudogene
ENSG00000258428	108.612	98.8547	89.3715	82.4959	126.247	114.182	103.294	108.077	98.5107	-0.133707	0.0237547	0.680167	AL161757.2	novel transcript, antisense to C14orf101
ENSG00000144278	2.85822	1.20554	1.86191	0.896695	2.1218	0.906203	1.64173	2.28064	1.00281	-1.18539	0.0238326	0.680167	GALNT13	polypeptide N-acetylgalactosaminyltransferase 13 [Source:HGNC Symbol;Acc:HGNC:23242]
ENSG00000117122	2.85822	1.20554	1.86191	0	1.0609	0	1.16443	1.92701	0.401848	-2.26164	0.0238519	0.680167	MFAP2	microfibril associated protein 2 [Source:HGNC Symbol;Acc:HGNC:7033]
ENSG00000157766	20.9603	14.4665	15.8262	10.7603	35.0097	26.2799	20.5505	23.9321	17.1689	-0.479145	0.0239652	0.680167	ACAN	aggrecan [Source:HGNC Symbol;Acc:HGNC:319]
ENSG00000232134	0.952739	3.61663	0.930953	2.69008	1.0609	2.71861	1.99499	0.981531	3.00844	1.61591	0.024006	0.680167	RPS15AP12	ribosomal protein S15a pseudogene 12 [Source:HGNC Symbol;Acc:HGNC:36759]
ENSG00000106333	1.90548	7.23327	6.51667	9.86364	3.1827	9.06203	6.29397	3.86828	8.71965	1.17258	0.0242087	0.680167	PCOLCE	procollagen C-endopeptidase enhancer [Source:HGNC Symbol;Acc:HGNC:8738]
ENSG00000173258	17.1493	31.3442	31.6524	44.8347	14.8526	36.2481	29.3469	21.2181	37.4757	0.820659	0.0243718	0.680167	ZNF483	zinc finger protein 483 [Source:HGNC Symbol;Acc:HGNC:23384]
ENSG00000236942	6.66917	4.82218	10.2405	7.17356	9.54811	6.34342	7.46615	8.81925	6.11305	-0.528764	0.0244871	0.680167	AC096533.1	GABA(A) receptor-associated protein (GABARAP) pseudogene
ENSG00000115234	34.2986	22.9053	40.031	27.7975	33.9488	15.4055	29.0645	36.0928	22.0361	-0.711841	0.0248124	0.680167	SNX17	sorting nexin 17 [Source:HGNC Symbol;Acc:HGNC:14979]
ENSG00000189167	2.85822	1.20554	2.79286	0.896695	1.0609	0	1.46904	2.23733	0.700746	-1.67481	0.0250752	0.680167	ZAR1L	zygote arrest 1 like [Source:HGNC Symbol;Acc:HGNC:37116]
ENSG00000226252	1.90548	0	4.65477	3.58678	4.2436	2.71861	2.85154	3.60128	2.1018	-0.776888	0.0250908	0.680167	AL135960.1	novel transcript
ENSG00000249293	23.8185	40.9885	14.8952	32.281	18.0353	28.0923	26.3518	18.9163	33.7873	0.836847	0.0252276	0.680167	AC091868.2	novel transcript
ENSG00000258017	10915.5	12125.4	8319.93	9531.87	9594.79	11507.9	10332.6	9610.08	11055	0.202083	0.0252509	0.680167	AC011603.3	novel transcript, antisense to TUBA1B
ENSG00000100365	5.71643	0	9.30953	4.48347	3.1827	0	3.78202	6.06956	1.49449	-2.02194	0.0253166	0.680167	NCF4	neutrophil cytosolic factor 4 [Source:HGNC Symbol;Acc:HGNC:7662]
ENSG00000258352	1.90548	2.41109	2.79286	3.58678	0	0.906203	1.93373	1.56611	2.30136	0.555297	0.0253336	0.680167	AC119044.1	interferon induced transmembrane protein 3 (1-8U) (IFITM3) pseudogene
ENSG00000268678	1.90548	2.41109	2.79286	3.58678	0	0.906203	1.93373	1.56611	2.30136	0.555297	0.0253336	0.680167	AC005261.3	novel transcript, antisense to ZNF304
ENSG00000189050	3.81096	8.43881	1.86191	4.48347	1.0609	4.53102	4.03118	2.24459	5.81777	1.37402	0.0254727	0.680167	RNFT1	ring finger protein, transmembrane 1 [Source:HGNC Symbol;Acc:HGNC:30206]
ENSG00000154511	2952.54	3901.14	3610.24	4733.65	2854.88	3478.91	3588.56	3139.22	4037.9	0.3632	0.0254945	0.680167	DIPK1A	divergent protein kinase domain 1A [Source:HGNC Symbol;Acc:HGNC:32213]
ENSG00000265845	89.5575	74.7438	72.6143	54.6984	118.821	93.3389	83.9623	93.6642	74.2604	-0.334906	0.0256392	0.680167	AC024267.5	novel transcript, antisense to PHF12
ENSG00000110060	37.1568	65.0994	47.4786	72.6323	36.0706	51.6536	51.6819	40.2354	63.1284	0.649826	0.0257015	0.680167	PUS3	pseudouridine synthase 3 [Source:HGNC Symbol;Acc:HGNC:25461]
ENSG00000260808	221.035	185.654	215.05	171.269	247.19	222.926	210.521	227.759	193.283	-0.236791	0.0258432	0.680167	AP003096.1	novel transcript
ENSG00000173531	30.4876	21.6998	29.7905	15.2438	45.6187	29.9047	28.7909	35.299	22.2828	-0.663697	0.0260021	0.680167	MST1	macrophage stimulating 1 [Source:HGNC Symbol;Acc:HGNC:7380]
ENSG00000248690	10.4801	2.41109	7.44762	2.69008	12.7308	7.24963	7.16823	10.2195	4.11693	-1.31169	0.0260738	0.680167	HAS2-AS1	HAS2 antisense RNA 1 [Source:HGNC Symbol;Acc:HGNC:34340]
ENSG00000122034	106.707	166.365	164.779	223.277	102.907	136.837	150.145	124.798	175.493	0.491823	0.0263117	0.680167	GTF3A	general transcription factor IIIA [Source:HGNC Symbol;Acc:HGNC:4662]
ENSG00000170790	18.102	14.4665	6.51667	2.69008	8.48721	6.34342	9.43433	11.0353	7.83335	-0.494426	0.026508	0.680167	OR10A2	olfactory receptor family 10 subfamily A member 2 [Source:HGNC Symbol;Acc:HGNC:8161]
ENSG00000075073	6.66917	0	11.1714	5.38017	6.3654	2.71861	5.38413	8.06867	2.69959	-1.57959	0.0268327	0.680167	TACR2	tachykinin receptor 2 [Source:HGNC Symbol;Acc:HGNC:11527]
ENSG00000137872	1.90548	2.41109	0.930953	1.79339	0	0.906203	1.32452	0.945477	1.70356	0.849439	0.0268825	0.680167	SEMA6D	semaphorin 6D [Source:HGNC Symbol;Acc:HGNC:16770]
ENSG00000185038	0.952739	2.41109	0.930953	3.58678	2.1218	4.53102	2.4224	1.33516	3.50963	1.3943	0.0270479	0.680167	MROH2A	maestro heat like repeat family member 2A [Source:HGNC Symbol;Acc:HGNC:27936]
ENSG00000198786	7.62191	4.82218	11.1714	8.07025	13.7917	9.06203	9.08992	10.8617	7.31815	-0.569696	0.0274426	0.680167	MT-ND5	mitochondrially encoded NADH:ubiquinone oxidoreductase core subunit 5 [Source:HGNC Symbol;Acc:HGNC:7461]
ENSG00000092020	13.3383	8.43881	13.9643	5.38017	9.54811	3.62481	9.04909	12.2836	5.8146	-1.07898	0.0276254	0.680167	PPP2R3C	protein phosphatase 2 regulatory subunit B''gamma [Source:HGNC Symbol;Acc:HGNC:17485]
ENSG00000134058	0.952739	2.41109	0	0.896695	1.0609	2.71861	1.34001	0.671213	2.0088	1.58149	0.0278084	0.680167	CDK7	cyclin dependent kinase 7 [Source:HGNC Symbol;Acc:HGNC:1778]
ENSG00000267328	17.1493	30.1386	25.1357	48.4215	22.2789	38.9667	30.3485	21.5213	39.1756	0.86419	0.0278842	0.680167	AC002398.2	novel transcript
ENSG00000065989	1.90548	0	1.86191	0	1.0609	0	0.804714	1.60943	0	NA	0.0278892	0.680167	PDE4A	phosphodiesterase 4A [Source:HGNC Symbol;Acc:HGNC:8780]
ENSG00000158321	1.90548	0	1.86191	0	1.0609	0	0.804714	1.60943	0	NA	0.0278892	0.680167	AUTS2	activator of transcription and developmental regulator AUTS2 [Source:HGNC Symbol;Acc:HGNC:14262]
ENSG00000171873	1.90548	0	1.86191	0	1.0609	0	0.804714	1.60943	0	NA	0.0278892	0.680167	ADRA1D	adrenoceptor alpha 1D [Source:HGNC Symbol;Acc:HGNC:280]
ENSG00000173905	8.57465	6.02772	3.72381	0	7.42631	2.71861	4.74518	6.57492	2.91544	-1.17326	0.0279165	0.680167	GOLIM4	golgi integral membrane protein 4 [Source:HGNC Symbol;Acc:HGNC:15448]
ENSG00000068784	0.952739	2.41109	0	0.896695	0	0.906203	0.861121	0.31758	1.40466	2.14503	0.0279494	0.680167	SRBD1	S1 RNA binding domain 1 [Source:HGNC Symbol;Acc:HGNC:25521]
ENSG00000229809	0.952739	2.41109	0	0.896695	0	0.906203	0.861121	0.31758	1.40466	2.14503	0.0279494	0.680167	ZNF688	zinc finger protein 688 [Source:HGNC Symbol;Acc:HGNC:30489]
ENSG00000128567	12.3856	4.82218	9.30953	2.69008	15.9135	4.53102	8.27532	12.5362	4.01443	-1.64284	0.0279757	0.680167	PODXL	podocalyxin like [Source:HGNC Symbol;Acc:HGNC:9171]
ENSG00000270980	0.952739	0	0.930953	0	4.2436	2.71861	1.47432	2.04243	0.906203	-1.17238	0.0280702	0.680167	AC060764.1	coiled-coil-helix-coiled-coil-helix domain containing 2 (CHCHD2) pseudogene
ENSG00000138085	0.952739	2.41109	0.930953	2.69008	1.0609	3.62481	1.9451	0.981531	2.90866	1.56725	0.0280959	0.680167	ATRAID	all-trans retinoic acid induced differentiation factor [Source:HGNC Symbol;Acc:HGNC:24090]
ENSG00000173269	18.102	33.7552	31.6524	56.4918	21.218	36.2481	32.9113	23.6575	42.165	0.833751	0.0281235	0.680167	MMRN2	multimerin 2 [Source:HGNC Symbol;Acc:HGNC:19888]
ENSG00000249971	4.7637	1.20554	7.44762	0.896695	9.54811	4.53102	4.73211	7.25314	2.21109	-1.71385	0.0281326	0.680167	AC104116.1	novel transcript
ENSG00000011332	1.90548	2.41109	0	0.896695	0	0.906203	1.01991	0.635159	1.40466	1.14503	0.0281771	0.680167	DPF1	double PHD fingers 1 [Source:HGNC Symbol;Acc:HGNC:20225]
ENSG00000262115	37.1568	25.3164	32.5834	26.0042	45.6187	37.1543	33.9723	38.453	29.4916	-0.382789	0.0282487	0.680167	AC027601.3	novel transcript, antisense to AZI1
ENSG00000182327	10.4801	2.41109	5.58572	0	6.3654	1.81241	4.44246	7.47708	1.40783	-2.409	0.0283057	0.680167	GLTPD2	glycolipid transfer protein domain containing 2 [Source:HGNC Symbol;Acc:HGNC:33756]
ENSG00000257831	186.737	169.982	186.191	156.025	171.866	150.43	170.205	181.598	158.812	-0.193426	0.0284789	0.680167	AL136418.3	novel transcript, antisense to HEATR5A
ENSG00000083720	1.90548	0	2.79286	0.896695	1.0609	0	1.10932	1.91975	0.298898	-2.68319	0.0285669	0.680167	OXCT1	3-oxoacid CoA-transferase 1 [Source:HGNC Symbol;Acc:HGNC:8527]
ENSG00000183625	179.115	138.638	134.988	60.0786	198.388	141.368	142.096	170.831	113.361	-0.591638	0.0286497	0.680167	CCR3	C-C motif chemokine receptor 3 [Source:HGNC Symbol;Acc:HGNC:1604]
ENSG00000233766	0.952739	26.522	29.7905	43.938	7.42631	32.6233	23.5421	12.7232	34.3611	1.43332	0.0286985	0.680167	CAVIN2-AS1	CAVIN2 and TMEFF2 antisense RNA 1 [Source:HGNC Symbol;Acc:HGNC:40517]
ENSG00000198680	4.7637	1.20554	9.30953	6.27686	5.3045	0	4.47669	6.45924	2.49414	-1.37282	0.0287051	0.680167	TUSC1	tumor suppressor candidate 1 [Source:HGNC Symbol;Acc:HGNC:31010]
ENSG00000231890	48.5897	61.4828	36.3072	55.5951	36.0706	47.1226	47.528	40.3225	54.7335	0.440838	0.0287067	0.680167	DARS-AS1	DARS antisense RNA 1 [Source:HGNC Symbol;Acc:HGNC:40170]
ENSG00000112592	2.85822	8.43881	0	3.58678	9.54811	16.3117	6.7906	4.13544	9.44575	1.19162	0.0291451	0.680167	TBP	TATA-box binding protein [Source:HGNC Symbol;Acc:HGNC:11588]
ENSG00000221843	50.4952	27.7275	73.5453	59.1819	61.5322	34.4357	51.153	61.8576	40.4484	-0.612869	0.0291571	0.680167	C2orf16	chromosome 2 open reading frame 16 [Source:HGNC Symbol;Acc:HGNC:25275]
ENSG00000133816	1.90548	0	3.72381	1.79339	1.0609	0	1.41393	2.23006	0.597797	-1.89936	0.0293113	0.680167	MICAL2	microtubule associated monooxygenase, calponin and LIM domain containing 2 [Source:HGNC Symbol;Acc:HGNC:24693]
ENSG00000139797	20.9603	2.41109	19.55	2.69008	24.4007	14.4993	14.0852	21.637	6.53347	-1.72758	0.0293548	0.680167	RNF113B	ring finger protein 113B [Source:HGNC Symbol;Acc:HGNC:17267]
ENSG00000156958	0.952739	2.41109	1.86191	4.48347	0	1.81241	1.92027	0.938215	2.90232	1.62922	0.0293733	0.680167	GALK2	galactokinase 2 [Source:HGNC Symbol;Acc:HGNC:4119]
ENSG00000074621	134.336	79.5659	158.262	117.467	180.353	105.12	129.184	157.65	100.718	-0.646415	0.0294943	0.680167	SLC24A1	solute carrier family 24 member 1 [Source:HGNC Symbol;Acc:HGNC:10975]
ENSG00000225422	116.234	88.0048	99.612	47.5248	105.029	67.059	87.244	106.958	67.5295	-0.66346	0.0294944	0.680167	RBMS1P1	RNA binding motif single stranded interacting protein 1 pseudogene 1 [Source:HGNC Symbol;Acc:HGNC:9908]
ENSG00000245598	120.998	98.8547	105.198	93.2563	117.76	101.495	106.26	114.652	97.8686	-0.228342	0.0296553	0.680167	DACT3-AS1	DACT3 antisense RNA 1 [Source:HGNC Symbol;Acc:HGNC:44120]
ENSG00000047578	0	2.41109	0	1.79339	2.1218	5.43722	1.96058	0.707267	3.2139	2.184	0.0297091	0.680167	KIAA0556	KIAA0556 [Source:HGNC Symbol;Acc:HGNC:29068]
ENSG00000171481	0	1.20554	0	0.896695	1.0609	2.71861	0.980292	0.353634	1.60695	2.184	0.0297091	0.680167	OR1L3	olfactory receptor family 1 subfamily L member 3 [Source:HGNC Symbol;Acc:HGNC:8215]
ENSG00000204291	4.7637	2.41109	5.58572	2.69008	4.2436	2.71861	3.73547	4.86434	2.60659	-0.900078	0.0297697	0.680167	COL15A1	collagen type XV alpha 1 chain [Source:HGNC Symbol;Acc:HGNC:2192]
ENSG00000260229	189.595	83.1826	215.981	130.917	266.286	112.369	166.389	223.954	108.823	-1.04122	0.0298467	0.680167	PPIAP51	peptidylprolyl isomerase A pseudogene 51 [Source:HGNC Symbol;Acc:HGNC:53675]
ENSG00000164946	1.90548	0	4.65477	2.69008	1.0609	0	1.71854	2.54038	0.896695	-1.50236	0.0301188	0.680167	FREM1	FRAS1 related extracellular matrix 1 [Source:HGNC Symbol;Acc:HGNC:23399]
ENSG00000165837	14.2911	8.43881	15.8262	8.07025	9.54811	5.43722	10.2686	13.2218	7.31543	-0.853904	0.0303224	0.680167	ERICH6B	glutamate rich 6B [Source:HGNC Symbol;Acc:HGNC:26523]
ENSG00000179965	60.9753	77.1549	63.3048	81.5992	66.8368	95.1513	74.1704	63.7056	84.6351	0.409836	0.0305209	0.680167	ZNF771	zinc finger protein 771 [Source:HGNC Symbol;Acc:HGNC:29653]
ENSG00000104859	3.81096	0	7.44762	5.38017	7.42631	3.62481	4.61498	6.2283	3.00166	-1.05308	0.0307843	0.680167	CLASRP	CLK4 associating serine/arginine rich protein [Source:HGNC Symbol;Acc:HGNC:17731]
ENSG00000186583	20.0075	1.20554	13.9643	3.58678	12.7308	0	8.58249	15.5675	1.59744	-3.28471	0.030789	0.680167	SPATC1	spermatogenesis and centriole associated 1 [Source:HGNC Symbol;Acc:HGNC:30510]
ENSG00000231646	0.952739	3.61663	3.72381	8.07025	2.1218	7.24963	4.28914	2.26612	6.31217	1.47791	0.0307982	0.680167	FSIP2-AS1	FSIP2 antisense RNA 1 [Source:HGNC Symbol;Acc:HGNC:40978]
ENSG00000278811	567.832	569.017	444.996	445.657	556.973	558.221	523.783	523.267	524.299	0.00284118	0.0309386	0.680167	LINC00624	long intergenic non-protein coding RNA 624 [Source:HGNC Symbol;Acc:HGNC:44254]
ENSG00000174939	75.2664	44.6051	69.8215	47.5248	74.2631	57.997	61.5796	73.117	50.0423	-0.547058	0.0311941	0.680167	ASPHD1	aspartate beta-hydroxylase domain containing 1 [Source:HGNC Symbol;Acc:HGNC:27380]
ENSG00000258646	376.332	503.918	420.791	499.459	267.347	419.572	414.57	354.823	474.316	0.418749	0.0312008	0.680167	AL049780.1	novel transcript, antisense to EIF2B2
ENSG00000173728	4.7637	2.41109	4.65477	2.69008	2.1218	0.906203	2.92461	3.84675	2.00246	-0.941869	0.0312132	0.680167	C1orf100	chromosome 1 open reading frame 100 [Source:HGNC Symbol;Acc:HGNC:30435]
ENSG00000268894	5.71643	27.7275	18.6191	38.5579	8.48721	19.9365	19.8408	10.9409	28.7406	1.39336	0.0314071	0.680167	PLCE1-AS1	PLCE1 antisense RNA 1 [Source:HGNC Symbol;Acc:HGNC:45193]
ENSG00000260005	123.856	67.5105	113.576	70.8389	151.709	122.337	108.305	129.714	86.8956	-0.577976	0.0315177	0.680167	AC027601.2	novel transcript, antisense to C17orf56
ENSG00000261063	14.2911	8.43881	11.1714	8.07025	26.5225	20.8427	14.8895	17.3283	12.4506	-0.476921	0.0316952	0.680167	AC009139.2	novel transcript, antisense to MON1B & SYCE1L
ENSG00000161944	2.85822	1.20554	0.930953	0	1.0609	0	1.00927	1.61669	0.401848	-2.00832	0.031838	0.680167	ASGR2	asialoglycoprotein receptor 2 [Source:HGNC Symbol;Acc:HGNC:743]
ENSG00000167912	0.952739	3.61663	0	1.79339	1.0609	4.53102	1.99245	0.671213	3.31368	2.30359	0.0319679	0.680167	AC090152.1	novel transcript
ENSG00000281691	181.973	206.148	149.883	192.789	160.196	187.584	179.762	164.018	195.507	0.253372	0.032111	0.680167	RBM5-AS1	RBM5 antisense RNA 1 [Source:HGNC Symbol;Acc:HGNC:48871]
ENSG00000256745	16.1966	9.64436	13.9643	5.38017	15.9135	3.62481	10.7873	15.3581	6.21645	-1.30484	0.0321267	0.680167	AP002784.2	actin related protein 2/3 complex, subunit 3, 21kDa (ARPC3) pseudogene
ENSG00000069188	0.952739	2.41109	0	2.69008	0	1.81241	1.31105	0.31758	2.30453	2.85928	0.0323166	0.680167	SDK2	sidekick cell adhesion molecule 2 [Source:HGNC Symbol;Acc:HGNC:19308]
ENSG00000181396	0.952739	2.41109	0	2.69008	0	1.81241	1.31105	0.31758	2.30453	2.85928	0.0323166	0.680167	OGFOD3	2-oxoglutarate and iron dependent oxygenase domain containing 3 [Source:HGNC Symbol;Acc:HGNC:26174]
ENSG00000256540	0.952739	2.41109	1.86191	2.69008	0	0.906203	1.47034	0.938215	2.00246	1.09378	0.0330207	0.680167	AC007406.3	novel transcript
ENSG00000160917	12.3856	7.23327	14.8952	11.657	19.0962	12.6868	12.9924	15.459	10.5257	-0.554531	0.0331966	0.680167	CPSF4	cleavage and polyadenylation specific factor 4 [Source:HGNC Symbol;Acc:HGNC:2327]
ENSG00000120458	0	1.20554	1.86191	3.58678	0	0.906203	1.26007	0.620635	1.89951	1.61381	0.0332375	0.680167	MSANTD2	Myb/SANT DNA binding domain containing 2 [Source:HGNC Symbol;Acc:HGNC:26266]
ENSG00000156735	0	1.20554	1.86191	3.58678	0	0.906203	1.26007	0.620635	1.89951	1.61381	0.0332375	0.680167	BAG4	BCL2 associated athanogene 4 [Source:HGNC Symbol;Acc:HGNC:940]
ENSG00000224281	80.0301	132.61	104.267	176.649	55.1668	92.4327	106.859	79.8212	133.897	0.746281	0.0335646	0.680167	SLC25A5-AS1	SLC25A5 antisense RNA 1 [Source:HGNC Symbol;Acc:HGNC:43438]
ENSG00000175416	1.90548	3.61663	0.930953	1.79339	3.1827	4.53102	2.66003	2.00638	3.31368	0.723841	0.033597	0.680167	CLTB	clathrin light chain B [Source:HGNC Symbol;Acc:HGNC:2091]
ENSG00000116791	29.5349	33.7552	23.2738	29.5909	26.5225	29.9047	28.7637	26.4438	31.0836	0.233228	0.0336125	0.680167	CRYZ	crystallin zeta [Source:HGNC Symbol;Acc:HGNC:2419]
ENSG00000271032	593.556	337.552	423.584	222.38	712.925	334.389	437.398	576.688	298.107	-0.951961	0.033633	0.680167	AC020907.4	novel transcript
ENSG00000259678	1527.24	1023.51	1318.23	1000.71	1646.52	1014.04	1255.04	1497.33	1012.75	-0.564109	0.0338011	0.680167	AC066613.2	novel transcript, antisense to DMXL2
ENSG00000184588	1.90548	3.61663	0.930953	2.69008	0	0.906203	1.67489	0.945477	2.40431	1.34651	0.0341345	0.680167	PDE4B	phosphodiesterase 4B [Source:HGNC Symbol;Acc:HGNC:8781]
ENSG00000157077	0.952739	3.61663	0	3.58678	0	1.81241	1.66143	0.31758	3.00527	3.24231	0.0344718	0.680167	ZFYVE9	zinc finger FYVE-type containing 9 [Source:HGNC Symbol;Acc:HGNC:6775]
ENSG00000140463	111.47	62.6883	75.4072	51.1116	95.4811	57.0908	75.5416	94.1196	56.9636	-0.724455	0.0345873	0.680167	BBS4	Bardet-Biedl syndrome 4 [Source:HGNC Symbol;Acc:HGNC:969]
ENSG00000181392	3.81096	2.41109	2.79286	0	2.1218	0	1.85612	2.90854	0.803696	-1.85557	0.0346293	0.680167	SYNE4	spectrin repeat containing nuclear envelope family member 4 [Source:HGNC Symbol;Acc:HGNC:26703]
ENSG00000188931	57.1643	49.4273	53.9953	48.4215	49.8623	38.9667	49.6396	53.674	45.6052	-0.235025	0.0347726	0.680167	CFAP126	cilia and flagella associated protein 126 [Source:HGNC Symbol;Acc:HGNC:32325]
ENSG00000149506	0.952739	2.41109	0	0.896695	0	1.81241	1.01215	0.31758	1.70673	2.42604	0.0349137	0.680167	ZP1	zona pellucida glycoprotein 1 [Source:HGNC Symbol;Acc:HGNC:13187]
ENSG00000224463	12.3856	6.02772	11.1714	3.58678	12.7308	0.906203	7.80143	12.096	3.5069	-1.78626	0.0352245	0.680167	AC079354.1	ribosomal protein L39 (RPL39) pseudogene
ENSG00000118997	4.7637	7.23327	3.72381	5.38017	2.1218	5.43722	4.77666	3.53644	6.01689	0.766721	0.0353217	0.680167	DNAH7	dynein axonemal heavy chain 7 [Source:HGNC Symbol;Acc:HGNC:18661]
ENSG00000180190	0	1.20554	0.930953	2.69008	0	0.906203	0.955464	0.310318	1.60061	2.3668	0.0355075	0.680167	TDRP	testis development related protein [Source:HGNC Symbol;Acc:HGNC:26951]
ENSG00000115325	84.7938	65.0994	81.9239	45.7314	99.7247	77.0273	75.7167	88.8141	62.6194	-0.50418	0.0355259	0.680167	DOK1	docking protein 1 [Source:HGNC Symbol;Acc:HGNC:2990]
ENSG00000167363	0.952739	3.61663	2.79286	5.38017	3.1827	4.53102	3.40935	2.30943	4.50927	0.965356	0.035568	0.680167	FN3K	fructosamine 3 kinase [Source:HGNC Symbol;Acc:HGNC:24822]
ENSG00000120925	27.6294	25.3164	27.9286	24.2108	20.1571	18.1241	23.8944	25.2384	22.5504	-0.162465	0.0356071	0.680167	RNF170	ring finger protein 170 [Source:HGNC Symbol;Acc:HGNC:25358]
ENSG00000182583	0.952739	0	2.79286	0.896695	3.1827	1.81241	1.60623	2.30943	0.903034	-1.35469	0.035661	0.680167	VCX	variable charge X-linked [Source:HGNC Symbol;Acc:HGNC:12667]
ENSG00000063854	0	1.20554	0.930953	2.69008	2.1218	4.53102	1.91323	1.01758	2.80888	1.46485	0.0357005	0.680167	HAGH	hydroxyacylglutathione hydrolase [Source:HGNC Symbol;Acc:HGNC:4805]
ENSG00000129048	258.192	191.682	265.322	216.103	233.398	200.271	227.495	252.304	202.685	-0.315922	0.0357276	0.680167	ACKR4	atypical chemokine receptor 4 [Source:HGNC Symbol;Acc:HGNC:1611]
ENSG00000260428	1.90548	4.82218	1.86191	3.58678	1.0609	2.71861	2.65931	1.60943	3.70919	1.20456	0.0358979	0.680167	SCX	scleraxis bHLH transcription factor [Source:HGNC Symbol;Acc:HGNC:32322]
ENSG00000279390	18.102	13.261	28.8595	19.7273	16.9744	7.24963	17.3623	21.312	13.4126	-0.668073	0.0359107	0.680167	AF127577.6	TEC
ENSG00000264019	7.62191	10.8499	2.79286	8.96695	3.1827	7.24963	6.77732	4.53249	9.02216	0.993168	0.0360515	0.680167	AC018521.2	novel transcript, antisense to PNPO
ENSG00000182325	25.724	20.4943	16.7572	13.4504	25.4616	22.6551	20.7571	22.6476	18.8666	-0.263523	0.0361063	0.680167	FBXL6	F-box and leucine rich repeat protein 6 [Source:HGNC Symbol;Acc:HGNC:13603]
ENSG00000168917	8.57465	13.261	7.44762	9.86364	4.2436	9.06203	8.74209	6.75529	10.7289	0.66741	0.0364143	0.680167	SLC35G2	solute carrier family 35 member G2 [Source:HGNC Symbol;Acc:HGNC:28480]
ENSG00000229414	4.7637	8.43881	2.79286	9.86364	5.3045	9.96823	6.85529	4.28702	9.42356	1.1363	0.0364436	0.680167	KCNQ1-AS1	KCNQ1 antisense RNA 1 [Source:HGNC Symbol;Acc:HGNC:42790]
ENSG00000213995	1.90548	3.61663	0.930953	2.69008	4.2436	7.24963	3.4394	2.36001	4.51878	0.93714	0.0364544	0.680167	NAXD	NAD(P)HX dehydratase [Source:HGNC Symbol;Acc:HGNC:25576]
ENSG00000125375	20.0075	37.3719	17.6881	27.7975	12.7308	22.6551	23.0418	16.8088	29.2748	0.800443	0.0365158	0.680167	DMAC2L	distal membrane arm assembly complex 2 like [Source:HGNC Symbol;Acc:HGNC:18799]
ENSG00000113889	1.90548	3.61663	0	0.896695	0	1.81241	1.37187	0.635159	2.10858	1.73108	0.0365854	0.680167	KNG1	kininogen 1 [Source:HGNC Symbol;Acc:HGNC:6383]
ENSG00000272267	119.092	96.4436	101.474	77.1158	124.125	83.3707	100.27	114.897	85.6433	-0.423931	0.0367894	0.680167	AC021242.3	novel transcript, antisense to TNKS
ENSG00000185787	23.8185	20.4943	27.9286	21.5207	28.6443	24.4675	24.479	26.7971	22.1608	-0.274068	0.0371436	0.680167	MORF4L1	mortality factor 4 like 1 [Source:HGNC Symbol;Acc:HGNC:16989]
ENSG00000214559	15.2438	30.1386	6.51667	17.0372	11.6699	19.0303	16.6061	11.1435	22.0687	0.985803	0.0377284	0.680167	AC019077.1	novel transcript
ENSG00000099957	0	1.20554	0	1.79339	0	0.906203	0.650856	0	1.30171	NA	0.0378155	0.680167	P2RX6	purinergic receptor P2X 6 [Source:HGNC Symbol;Acc:HGNC:8538]
ENSG00000103089	0	1.20554	0	1.79339	0	0.906203	0.650856	0	1.30171	NA	0.0378155	0.680167	FA2H	fatty acid 2-hydroxylase [Source:HGNC Symbol;Acc:HGNC:21197]
ENSG00000130813	0	1.20554	0	1.79339	0	0.906203	0.650856	0	1.30171	NA	0.0378155	0.680167	SHFL	shiftless antiviral inhibitor of ribosomal frameshifting [Source:HGNC Symbol;Acc:HGNC:25649]
ENSG00000148408	0	1.20554	0	1.79339	0	0.906203	0.650856	0	1.30171	NA	0.0378155	0.680167	CACNA1B	calcium voltage-gated channel subunit alpha1 B [Source:HGNC Symbol;Acc:HGNC:1389]
ENSG00000150625	0	1.20554	0	1.79339	0	0.906203	0.650856	0	1.30171	NA	0.0378155	0.680167	GPM6A	glycoprotein M6A [Source:HGNC Symbol;Acc:HGNC:4460]
ENSG00000162542	0	1.20554	0	1.79339	0	0.906203	0.650856	0	1.30171	NA	0.0378155	0.680167	TMCO4	transmembrane and coiled-coil domains 4 [Source:HGNC Symbol;Acc:HGNC:27393]
ENSG00000180209	0	1.20554	0	1.79339	0	0.906203	0.650856	0	1.30171	NA	0.0378155	0.680167	MYLPF	myosin light chain, phosphorylatable, fast skeletal muscle [Source:HGNC Symbol;Acc:HGNC:29824]
ENSG00000183484	0	1.20554	0	1.79339	0	0.906203	0.650856	0	1.30171	NA	0.0378155	0.680167	GPR132	G protein-coupled receptor 132 [Source:HGNC Symbol;Acc:HGNC:17482]
ENSG00000280649	3.81096	6.02772	2.79286	7.17356	6.3654	10.8744	6.17416	4.32307	8.02524	0.892487	0.0380571	0.680167	AC245100.8	TEC
ENSG00000089280	1.90548	3.61663	1.86191	5.38017	1.0609	3.62481	2.90832	1.60943	4.20721	1.38631	0.0380775	0.680167	FUS	FUS RNA binding protein [Source:HGNC Symbol;Acc:HGNC:4010]
ENSG00000241984	0.952739	0	1.86191	0	2.1218	0.906203	0.973775	1.64548	0.302068	-2.44557	0.0381323	0.680167	RPL7AP2	ribosomal protein L7a pseudogene 2 [Source:HGNC Symbol;Acc:HGNC:23552]
ENSG00000267787	758.38	1176.61	594.879	1006.09	833.868	1040.32	901.692	729.042	1074.34	0.559378	0.0381557	0.680167	AC027097.2	novel transcript, antisense to ATP8B1
ENSG00000256269	6.66917	12.0554	11.1714	21.5207	4.2436	15.4055	11.8443	7.3614	16.3272	1.14922	0.0382241	0.680167	HMBS	hydroxymethylbilane synthase [Source:HGNC Symbol;Acc:HGNC:4982]
ENSG00000280739	1.90548	15.6721	17.6881	24.2108	0	11.7806	11.8762	6.5312	17.2212	1.39876	0.0385227	0.680167	EIF1B-AS1	EIF1B antisense RNA 1 [Source:HGNC Symbol;Acc:HGNC:44555]
ENSG00000255468	0	3.61663	0	1.79339	0	3.62481	1.50581	0	3.01161	NA	0.038557	0.680167	AP001107.9	novel transcript, antisense to SLC29A2
ENSG00000100422	5.71643	9.64436	4.65477	12.5537	1.0609	9.06203	7.11537	3.8107	10.42	1.45123	0.0387888	0.680167	CERK	ceramide kinase [Source:HGNC Symbol;Acc:HGNC:19256]
ENSG00000133805	5.71643	1.20554	11.1714	1.79339	10.609	1.81241	5.3847	9.16563	1.60378	-2.51476	0.0388073	0.680167	AMPD3	adenosine monophosphate deaminase 3 [Source:HGNC Symbol;Acc:HGNC:470]
ENSG00000163607	264.861	308.619	290.457	312.05	178.231	222.02	262.707	244.517	280.896	0.200105	0.0389094	0.680167	GTPBP8	GTP binding protein 8 (putative) [Source:HGNC Symbol;Acc:HGNC:25007]
ENSG00000269937	100.038	57.8661	105.198	69.0455	128.369	59.8094	86.7209	111.201	62.2403	-0.837253	0.0389209	0.680167	AC093525.7	novel transcript, antisense to PDPK1
ENSG00000133142	1.90548	7.23327	9.30953	20.624	3.1827	12.6868	9.15697	4.79924	13.5147	1.49365	0.0389649	0.680167	TCEAL4	transcription elongation factor A like 4 [Source:HGNC Symbol;Acc:HGNC:26121]
ENSG00000130255	41.9205	53.044	33.5143	56.4918	41.3751	63.4342	48.2967	38.9367	57.6567	0.566358	0.0389668	0.680167	RPL36	ribosomal protein L36 [Source:HGNC Symbol;Acc:HGNC:13631]
ENSG00000255108	164.824	95.238	197.362	164.095	218.546	154.055	165.687	193.577	137.796	-0.490376	0.0390142	0.680167	AP006621.1	novel transcript
ENSG00000258012	3.81096	8.43881	1.86191	10.7603	11.6699	17.2179	8.95996	5.78092	12.139	1.07028	0.0392204	0.680167	AC026111.1	methionine adenosyltransferase II, alpha (MAT2A) pseudogene
ENSG00000268087	1.90548	3.61663	1.86191	2.69008	1.0609	2.71861	2.30894	1.60943	3.00844	0.902468	0.0392989	0.680167	AC008764.2	novel transcript
ENSG00000164054	8.57465	7.23327	4.65477	1.79339	9.54811	7.24963	6.50897	7.59251	5.42543	-0.48484	0.0394522	0.680167	SHISA5	shisa family member 5 [Source:HGNC Symbol;Acc:HGNC:30376]
ENSG00000147065	2.85822	12.0554	6.51667	13.4504	7.42631	11.7806	9.01462	5.6004	12.4288	1.15009	0.0395053	0.680167	MSN	moesin [Source:HGNC Symbol;Acc:HGNC:7373]
ENSG00000168612	4.7637	9.64436	10.2405	12.5537	0	3.62481	6.80451	5.00139	8.60763	0.783287	0.0397432	0.680167	ZSWIM1	zinc finger SWIM-type containing 1 [Source:HGNC Symbol;Acc:HGNC:16155]
ENSG00000253882	35.2513	53.044	18.6191	47.5248	26.5225	64.3404	40.8837	26.7976	54.9697	1.03653	0.0397701	0.680167	AC099548.2	family with sequence similarity 115, member C (FAM115C) pseudogene
ENSG00000205485	160.06	116.938	177.812	105.81	200.51	162.21	153.89	179.461	128.319	-0.48393	0.0398248	0.680167	AC004980.1	pseudogene similar to part of postmeiotic segregation increased 2-like 3 PMS2L3
ENSG00000253667	2.85822	9.64436	13.9643	24.2108	14.8526	19.9365	14.2445	10.5584	17.9305	0.76403	0.0399217	0.680167	AC100821.1	ESF1, nucleolar pre-rRNA processing protein, homolog (S. cerevisiae) (ESF1) pseudogene
ENSG00000126777	0	1.20554	0	0.896695	0	1.81241	0.652441	0	1.30488	NA	0.0399583	0.680167	KTN1	kinectin 1 [Source:HGNC Symbol;Acc:HGNC:6467]
ENSG00000142920	0	1.20554	0	0.896695	0	1.81241	0.652441	0	1.30488	NA	0.0399583	0.680167	AZIN2	antizyme inhibitor 2 [Source:HGNC Symbol;Acc:HGNC:29957]
ENSG00000147439	0	1.20554	0	0.896695	0	1.81241	0.652441	0	1.30488	NA	0.0399583	0.680167	BIN3	bridging integrator 3 [Source:HGNC Symbol;Acc:HGNC:1054]
ENSG00000198851	0	1.20554	0	0.896695	0	1.81241	0.652441	0	1.30488	NA	0.0399583	0.680167	CD3E	CD3e molecule [Source:HGNC Symbol;Acc:HGNC:1674]
ENSG00000232778	0	1.20554	0	0.896695	0	1.81241	0.652441	0	1.30488	NA	0.0399583	0.680167	RPL23AP50	ribosomal protein L23a pseudogene 50 [Source:HGNC Symbol;Acc:HGNC:35958]
ENSG00000257704	0	1.20554	0	0.896695	0	1.81241	0.652441	0	1.30488	NA	0.0399583	0.680167	INAFM1	InaF motif containing 1 [Source:HGNC Symbol;Acc:HGNC:27406]
ENSG00000263960	0	1.20554	0	0.896695	0	1.81241	0.652441	0	1.30488	NA	0.0399583	0.680167	NA	NA
ENSG00000146094	1.90548	0	1.86191	0.896695	2.1218	0.906203	1.28201	1.96306	0.600966	-1.70775	0.0400599	0.680167	DOK3	docking protein 3 [Source:HGNC Symbol;Acc:HGNC:24583]
ENSG00000136634	14.2911	6.02772	7.44762	3.58678	6.3654	0	6.28644	9.36804	3.20483	-1.5475	0.0402262	0.680167	IL10	interleukin 10 [Source:HGNC Symbol;Acc:HGNC:5962]
ENSG00000175426	47.637	38.5774	54.9262	50.2149	31.827	26.2799	41.5771	44.7967	38.3574	-0.223888	0.040232	0.680167	PCSK1	proprotein convertase subtilisin/kexin type 1 [Source:HGNC Symbol;Acc:HGNC:8743]
ENSG00000237248	8.57465	12.0554	18.6191	22.4174	5.3045	11.7806	13.1253	10.8327	15.4178	0.509201	0.0403457	0.680167	LINC00987	long intergenic non-protein coding RNA 987 [Source:HGNC Symbol;Acc:HGNC:48911]
ENSG00000129636	65.739	86.7992	68.8905	94.153	48.8014	89.7141	75.6829	61.1437	90.2221	0.561278	0.0405419	0.680167	ITFG1	integrin alpha FG-GAP repeat containing 1 [Source:HGNC Symbol;Acc:HGNC:30697]
ENSG00000213514	3.81096	1.20554	7.44762	4.48347	3.1827	1.81241	3.65712	4.81376	2.50048	-0.944962	0.0408942	0.680167	AL731556.1	novel zinc finger pseudogene (KIAA1629)
ENSG00000187010	198.17	121.76	436.617	271.699	233.398	107.838	228.247	289.395	167.099	-0.792338	0.0411406	0.680167	RHD	Rh blood group D antigen [Source:HGNC Symbol;Acc:HGNC:10009]
ENSG00000147679	49.5424	55.4551	40.9619	49.3182	27.5834	39.8729	43.789	39.3626	48.2154	0.292669	0.0413162	0.680167	UTP23	UTP23 small subunit processome component [Source:HGNC Symbol;Acc:HGNC:28224]
ENSG00000136930	139.1	122.966	107.991	74.4257	119.882	86.0893	108.409	122.324	94.4935	-0.372421	0.0414358	0.680167	PSMB7	proteasome 20S subunit beta 7 [Source:HGNC Symbol;Acc:HGNC:9544]
ENSG00000163291	192.453	227.848	207.603	242.108	183.536	200.271	208.97	194.531	223.409	0.199689	0.0415434	0.680167	PAQR3	progestin and adipoQ receptor family member 3 [Source:HGNC Symbol;Acc:HGNC:30130]
ENSG00000121989	3.81096	6.02772	2.79286	7.17356	0	2.71861	3.75395	2.20127	5.30663	1.26946	0.0415959	0.680167	ACVR2A	activin A receptor type 2A [Source:HGNC Symbol;Acc:HGNC:173]
ENSG00000187742	13.3383	1.20554	8.37858	1.79339	15.9135	9.06203	8.2819	12.5435	4.02032	-1.64155	0.0421048	0.680167	SECISBP2	SECIS binding protein 2 [Source:HGNC Symbol;Acc:HGNC:30972]
ENSG00000135298	3.81096	7.23327	3.72381	5.38017	3.1827	5.43722	4.79469	3.57249	6.01689	0.752087	0.0421764	0.680167	ADGRB3	adhesion G protein-coupled receptor B3 [Source:HGNC Symbol;Acc:HGNC:945]
ENSG00000123096	210.555	179.626	87.5096	67.2521	130.491	86.9955	127.072	142.852	111.291	-0.36018	0.0424171	0.680167	SSPN	sarcospan [Source:HGNC Symbol;Acc:HGNC:11322]
ENSG00000136159	9.52739	6.02772	13.0333	10.7603	11.6699	9.96823	10.1645	11.4102	8.91877	-0.35541	0.0424565	0.680167	NUDT15	nudix hydrolase 15 [Source:HGNC Symbol;Acc:HGNC:23063]
ENSG00000273137	14.2911	9.64436	18.6191	12.5537	12.7308	9.96823	12.9679	15.2137	10.7221	-0.504778	0.0424875	0.680167	AL022328.2	novel transcript, antisense to SELO
ENSG00000100985	32.3931	7.23327	25.1357	13.4504	41.3751	17.2179	22.8009	32.968	12.6338	-1.38377	0.0425515	0.680167	MMP9	matrix metallopeptidase 9 [Source:HGNC Symbol;Acc:HGNC:7176]
ENSG00000176261	19.0548	28.9331	27.9286	34.0744	15.9135	20.8427	24.4578	20.9656	27.95	0.414825	0.0425657	0.680167	ZBTB8OS	zinc finger and BTB domain containing 8 opposite strand [Source:HGNC Symbol;Acc:HGNC:24094]
ENSG00000235378	2.85822	0	2.79286	0.896695	3.1827	1.81241	1.92381	2.94459	0.903034	-1.70522	0.0426412	0.680167	MRPS10P1	mitochondrial ribosomal protein S10 pseudogene 1 [Source:HGNC Symbol;Acc:HGNC:29728]
ENSG00000226945	0.952739	0	3.72381	1.79339	2.1218	0.906203	1.58299	2.26612	0.899864	-1.33244	0.0427994	0.680167	AC098935.1	ribosomal protein L13a (RPL13A) pseudogene
ENSG00000140367	1.90548	0	4.65477	0.896695	3.1827	0.906203	1.92431	3.24765	0.600966	-2.43404	0.042806	0.680167	UBE2Q2	ubiquitin conjugating enzyme E2 Q2 [Source:HGNC Symbol;Acc:HGNC:19248]
ENSG00000140044	0.952739	2.41109	0.930953	1.79339	1.0609	1.81241	1.49358	0.981531	2.00563	1.03095	0.0429891	0.680167	JDP2	Jun dimerization protein 2 [Source:HGNC Symbol;Acc:HGNC:17546]
ENSG00000277182	0	1.20554	3.72381	4.48347	1.0609	2.71861	2.19872	1.5949	2.80254	0.813266	0.0431248	0.680167	AC006449.5	novel transcript, antisense to PCGF2
ENSG00000139880	0	1.20554	0.930953	1.79339	0	1.81241	0.957049	0.310318	1.60378	2.36966	0.0431433	0.680167	CDH24	cadherin 24 [Source:HGNC Symbol;Acc:HGNC:14265]
ENSG00000170634	0	1.20554	0.930953	1.79339	0	1.81241	0.957049	0.310318	1.60378	2.36966	0.0431433	0.680167	ACYP2	acylphosphatase 2 [Source:HGNC Symbol;Acc:HGNC:180]
ENSG00000272906	0	1.20554	0.930953	1.79339	0	1.81241	0.957049	0.310318	1.60378	2.36966	0.0431433	0.680167	AL353708.3	novel transcript, antisense to TOR1AIP1
ENSG00000138193	19.0548	26.522	19.55	35.8678	12.7308	28.0923	23.6363	17.1119	30.1607	0.817672	0.0432176	0.680167	PLCE1	phospholipase C epsilon 1 [Source:HGNC Symbol;Acc:HGNC:17175]
ENSG00000072756	19.0548	27.7275	22.3429	32.281	19.0962	23.5613	24.0106	20.1646	27.8566	0.466193	0.0432736	0.680167	TRNT1	tRNA nucleotidyl transferase 1 [Source:HGNC Symbol;Acc:HGNC:17341]
ENSG00000249379	79.0773	116.938	92.1644	139.884	51.9841	73.4025	92.2418	74.4086	110.075	0.564944	0.0432828	0.680167	AL033397.2	novel transcript
ENSG00000228728	8.57465	4.82218	11.1714	3.58678	7.42631	2.71861	6.38333	9.05746	3.70919	-1.288	0.0433759	0.680167	PPIAP91	peptidylprolyl isomerase A pseudogene 91 [Source:HGNC Symbol;Acc:HGNC:53715]
ENSG00000017427	0.952739	0	1.86191	0	2.1218	0	0.822741	1.64548	0	NA	0.0433915	0.680167	IGF1	insulin like growth factor 1 [Source:HGNC Symbol;Acc:HGNC:5464]
ENSG00000159199	0.952739	0	1.86191	0	2.1218	0	0.822741	1.64548	0	NA	0.0433915	0.680167	ATP5MC1	ATP synthase membrane subunit c locus 1 [Source:HGNC Symbol;Acc:HGNC:841]
ENSG00000200544	0.952739	0	1.86191	0	2.1218	0	0.822741	1.64548	0	NA	0.0433915	0.680167	AL356472.1
ENSG00000243646	0.952739	0	1.86191	0	2.1218	0	0.822741	1.64548	0	NA	0.0433915	0.680167	IL10RB	interleukin 10 receptor subunit beta [Source:HGNC Symbol;Acc:HGNC:5965]
ENSG00000087191	8.57465	6.02772	6.51667	4.48347	9.54811	5.43722	6.76464	8.21314	5.31614	-0.627556	0.043501	0.680167	PSMC5	proteasome 26S subunit, ATPase 5 [Source:HGNC Symbol;Acc:HGNC:9552]
ENSG00000247903	195.312	226.642	186.191	254.661	141.1	190.303	199.035	174.201	223.869	0.361903	0.0435918	0.680167	AC024896.1	novel transcript, antisense to TM7SF3
ENSG00000141040	0.952739	0	2.79286	0.896695	2.1218	0	1.12735	1.9558	0.298898	-2.71003	0.0436632	0.680167	ZNF287	zinc finger protein 287 [Source:HGNC Symbol;Acc:HGNC:13502]
ENSG00000248828	0	6.02772	0	4.48347	0	2.71861	2.20497	0	4.40994	NA	0.0439191	0.680167	NA	NA
ENSG00000259006	48.5897	56.6606	19.55	36.7645	63.654	75.2149	50.0723	43.9313	56.2133	0.355664	0.0439682	0.680167	AC092143.2	novel transcript, antisense to MC1R
ENSG00000119574	0.952739	0	3.72381	1.79339	2.1218	0	1.43196	2.26612	0.597797	-1.9225	0.0440054	0.680167	ZBTB45	zinc finger and BTB domain containing 45 [Source:HGNC Symbol;Acc:HGNC:23715]
ENSG00000224993	1.90548	0	5.58572	1.79339	3.1827	0.906203	2.22892	3.55797	0.899864	-1.98327	0.0440513	0.680167	RPL29P12	ribosomal protein L29 pseudogene 12 [Source:HGNC Symbol;Acc:HGNC:36608]
ENSG00000198727	2.85822	3.61663	4.65477	6.27686	1.0609	2.71861	3.531	2.85796	4.20404	0.556789	0.0445437	0.680167	MT-CYB	mitochondrially encoded cytochrome b [Source:HGNC Symbol;Acc:HGNC:7427]
ENSG00000143952	1.90548	3.61663	1.86191	3.58678	3.1827	6.34342	3.41615	2.3167	4.51561	0.962853	0.0446532	0.680167	VPS54	VPS54 subunit of GARP complex [Source:HGNC Symbol;Acc:HGNC:18652]
ENSG00000198865	74.3136	272.453	404.034	552.364	77.4458	165.835	257.741	185.264	330.217	0.833831	0.0447186	0.680167	CCDC152	coiled-coil domain containing 152 [Source:HGNC Symbol;Acc:HGNC:34438]
ENSG00000081059	26.6767	32.5497	25.1357	27.7975	23.3398	28.9985	27.4163	25.0507	29.7819	0.249583	0.0447976	0.680167	TCF7	transcription factor 7 [Source:HGNC Symbol;Acc:HGNC:11639]
ENSG00000143536	0	2.41109	2.79286	4.48347	0	3.62481	2.21871	0.930953	3.50646	1.91323	0.0448153	0.680167	CRNN	cornulin [Source:HGNC Symbol;Acc:HGNC:1230]
ENSG00000257663	125.762	121.76	72.6143	63.6653	88.0548	79.7459	91.9336	95.4769	88.3904	-0.111262	0.0448489	0.680167	AC025259.1	novel transcript, antisense to C12orf44
ENSG00000160973	3.81096	2.41109	2.79286	0	3.1827	0	2.03293	3.26217	0.803696	-2.02111	0.0451898	0.680167	FOXH1	forkhead box H1 [Source:HGNC Symbol;Acc:HGNC:3814]
ENSG00000260367	67.6445	55.4551	54.9262	49.3182	59.4104	47.1226	55.6462	60.6604	50.6319	-0.260707	0.0453057	0.680167	AC109460.1	novel transcript, antisense to SPNS1
ENSG00000110080	1.90548	0	2.79286	1.79339	1.0609	0	1.25877	1.91975	0.597797	-1.68319	0.0455754	0.680167	ST3GAL4	ST3 beta-galactoside alpha-2,3-sialyltransferase 4 [Source:HGNC Symbol;Acc:HGNC:10864]
ENSG00000242154	10.4801	1.20554	16.7572	3.58678	9.54811	3.62481	7.53375	12.2618	2.80571	-2.12773	0.045703	0.680167	AC004884.2	novel transcript
ENSG00000158792	1.90548	0	0.930953	0	2.1218	0	0.826372	1.65274	0	NA	0.0457645	0.680167	SPATA2L	spermatogenesis associated 2 like [Source:HGNC Symbol;Acc:HGNC:28393]
ENSG00000224505	1.90548	0	0.930953	0	2.1218	0	0.826372	1.65274	0	NA	0.0457645	0.680167	AC138150.1	novel transcript, antisense to HEXIM1 and HEXIM2
ENSG00000227688	1.90548	0	0.930953	0	2.1218	0	0.826372	1.65274	0	NA	0.0457645	0.680167	HNRNPA3P2	heterogeneous nuclear ribonucleoprotein A3 pseudogene 2 [Source:HGNC Symbol;Acc:HGNC:16605]
ENSG00000242609	1.90548	0	0.930953	0	2.1218	0	0.826372	1.65274	0	NA	0.0457645	0.680167	CCDC137P	coiled-coil domain containing 137 pseudogene [Source:HGNC Symbol;Acc:HGNC:33459]
ENSG00000257962	1.90548	0	0.930953	0	2.1218	0	0.826372	1.65274	0	NA	0.0457645	0.680167	AC011773.2	novel transcript, antisense to CA13
ENSG00000065518	0.952739	0	1.86191	0	1.0609	0	0.645924	1.29185	0	NA	0.0458993	0.680167	NDUFB4	NADH:ubiquinone oxidoreductase subunit B4 [Source:HGNC Symbol;Acc:HGNC:7699]
ENSG00000124733	0.952739	0	1.86191	0	1.0609	0	0.645924	1.29185	0	NA	0.0458993	0.680167	MEA1	male-enhanced antigen 1 [Source:HGNC Symbol;Acc:HGNC:6986]
ENSG00000139289	0.952739	0	1.86191	0	1.0609	0	0.645924	1.29185	0	NA	0.0458993	0.680167	PHLDA1	pleckstrin homology like domain family A member 1 [Source:HGNC Symbol;Acc:HGNC:8933]
ENSG00000148584	0.952739	0	1.86191	0	1.0609	0	0.645924	1.29185	0	NA	0.0458993	0.680167	A1CF	APOBEC1 complementation factor [Source:HGNC Symbol;Acc:HGNC:24086]
ENSG00000169181	0.952739	0	1.86191	0	1.0609	0	0.645924	1.29185	0	NA	0.0458993	0.680167	GSG1L	GSG1 like [Source:HGNC Symbol;Acc:HGNC:28283]
ENSG00000178026	0.952739	0	1.86191	0	1.0609	0	0.645924	1.29185	0	NA	0.0458993	0.680167	LRRC75B	leucine rich repeat containing 75B [Source:HGNC Symbol;Acc:HGNC:33155]
ENSG00000185483	0.952739	0	1.86191	0	1.0609	0	0.645924	1.29185	0	NA	0.0458993	0.680167	ROR1	receptor tyrosine kinase like orphan receptor 1 [Source:HGNC Symbol;Acc:HGNC:10256]
ENSG00000261573	0.952739	0	1.86191	0	1.0609	0	0.645924	1.29185	0	NA	0.0458993	0.680167	AL157402.2	novel transcript
ENSG00000263317	0.952739	0	1.86191	0	1.0609	0	0.645924	1.29185	0	NA	0.0458993	0.680167	LINC01982	long intergenic non-protein coding RNA 1982 [Source:HGNC Symbol;Acc:HGNC:52812]
ENSG00000253106	10.4801	21.6998	12.1024	18.8306	7.42631	22.6551	15.5324	10.0029	21.0618	1.07421	0.0459213	0.680167	AC090198.1	novel transcript, antisense to TATDN1
ENSG00000278907	0	1.20554	0.930953	3.58678	0	1.81241	1.25595	0.310318	2.20158	2.82672	0.0460494	0.680167	AC005609.2	novel transcript, antisense to PCDHA9
ENSG00000033011	54.3061	69.9216	67.0286	90.5662	62.5931	73.4025	69.6364	61.3093	77.9634	0.346691	0.0462324	0.680167	ALG1	ALG1 chitobiosyldiphosphodolichol beta-mannosyltransferase [Source:HGNC Symbol;Acc:HGNC:18294]
ENSG00000235066	236.279	191.682	212.257	188.306	193.084	137.743	193.225	213.874	172.577	-0.309519	0.046315	0.680167	AC009303.2	novel transcript, antisense to CCDC93
ENSG00000130816	20.0075	18.0832	21.4119	18.8306	20.1571	19.0303	19.5868	20.5255	18.648	-0.138397	0.0466821	0.680167	DNMT1	DNA methyltransferase 1 [Source:HGNC Symbol;Acc:HGNC:2976]
ENSG00000230262	14.2911	8.43881	19.55	6.27686	18.0353	5.43722	12.0049	17.2921	6.71763	-1.36409	0.0467066	0.680167	LINC02603	long intergenic non-protein coding RNA 2603 [Source:HGNC Symbol;Acc:HGNC:37186]
ENSG00000233144	151.486	220.615	178.743	211.62	85.933	128.681	162.846	138.72	186.972	0.43064	0.0467907	0.680167	AL512656.2	novel transcript
ENSG00000166321	50.4952	25.3164	58.65	33.1777	65.7759	54.3722	47.9646	58.307	37.6221	-0.632089	0.0468397	0.680167	NUDT13	nudix hydrolase 13 [Source:HGNC Symbol;Acc:HGNC:18827]
ENSG00000158315	7.62191	14.4665	9.30953	13.4504	8.48721	11.7806	10.8527	8.47288	13.2325	0.643164	0.0470693	0.680167	RHBDL2	rhomboid like 2 [Source:HGNC Symbol;Acc:HGNC:16083]
ENSG00000090674	2.85822	3.61663	0.930953	2.69008	3.1827	4.53102	2.96827	2.32396	3.61258	0.636445	0.0472237	0.680167	MCOLN1	mucolipin 1 [Source:HGNC Symbol;Acc:HGNC:13356]
ENSG00000141434	3.81096	2.41109	7.44762	5.38017	6.3654	5.43722	5.14208	5.87466	4.40949	-0.413893	0.0473001	0.680167	MEP1B	meprin A subunit beta [Source:HGNC Symbol;Acc:HGNC:7020]
ENSG00000278359	1.90548	0	4.65477	1.79339	4.2436	0	2.09954	3.60128	0.597797	-2.59078	0.0474558	0.680167	MIR7155	microRNA 7155 [Source:HGNC Symbol;Acc:HGNC:50005]
ENSG00000233966	3.81096	1.20554	6.51667	1.79339	10.609	4.53102	4.74443	6.97888	2.50998	-1.47532	0.0475137	0.680167	UBE2SP1	ubiquitin conjugating enzyme E2 S pseudogene 1 [Source:HGNC Symbol;Acc:HGNC:30864]
ENSG00000237181	27.6294	42.1941	26.0667	45.7314	28.6443	37.1543	34.57	27.4468	41.6933	0.603176	0.0475873	0.680167	AC147651.4	novel transcript
ENSG00000250794	0	1.20554	0	2.69008	0	1.81241	0.951339	0	1.90268	NA	0.0476567	0.680167	ALG1L12P	ALG1 like 12, pseudogene [Source:HGNC Symbol;Acc:HGNC:44381]
ENSG00000260083	71.4554	89.2103	64.2358	95.0497	59.4104	100.589	79.9917	65.0339	94.9495	0.545969	0.0476736	0.680167	MIR762HG	MIR762 host gene [Source:HGNC Symbol;Acc:HGNC:51386]
ENSG00000115129	9.52739	4.82218	14.8952	7.17356	12.7308	9.06203	9.70187	12.3845	7.01926	-0.819144	0.0476935	0.680167	TP53I3	tumor protein p53 inducible protein 3 [Source:HGNC Symbol;Acc:HGNC:19373]
ENSG00000112562	0	1.20554	0	2.69008	0	2.71861	1.10237	0	2.20475	NA	0.0477163	0.680167	SMOC2	SPARC related modular calcium binding 2 [Source:HGNC Symbol;Acc:HGNC:20323]
ENSG00000231868	0	1.20554	0	2.69008	0	2.71861	1.10237	0	2.20475	NA	0.0477163	0.680167	AL031848.1	novel transcript, antisense to ESPN
ENSG00000263657	20.0075	8.43881	23.2738	2.69008	36.0706	9.06203	16.5905	26.4507	6.73031	-1.97456	0.0478888	0.680167	AC023389.2	novel transcript, antisense to SSH2
ENSG00000083828	63.8335	44.6051	99.612	67.2521	57.2886	41.6853	62.3795	73.578	51.1809	-0.523671	0.0479635	0.680167	ZNF586	zinc finger protein 586 [Source:HGNC Symbol;Acc:HGNC:25949]
ENSG00000140326	197.217	212.176	147.091	182.029	194.145	225.645	193.05	179.484	206.616	0.203099	0.0479773	0.680167	CDAN1	codanin 1 [Source:HGNC Symbol;Acc:HGNC:1713]
ENSG00000134551	30.4876	38.5774	19.55	25.1075	21.218	33.5295	28.0783	23.7519	32.4048	0.448165	0.0481204	0.680167	PRH2	proline rich protein HaeIII subfamily 2 [Source:HGNC Symbol;Acc:HGNC:9367]
ENSG00000255148	50.4952	36.1663	36.3072	10.7603	68.9586	35.3419	39.6716	51.9203	27.4229	-0.920919	0.0483675	0.680167	AC239802.2	novel transcript
ENSG00000103740	28.5822	45.8107	47.4786	61.8719	37.1315	44.404	44.2131	37.7308	50.6955	0.426117	0.0484207	0.680167	ACSBG1	acyl-CoA synthetase bubblegum family member 1 [Source:HGNC Symbol;Acc:HGNC:29567]
ENSG00000081026	12.3856	6.02772	22.3429	11.657	26.5225	11.7806	15.1194	20.417	9.8218	-1.05571	0.048437	0.680167	MAGI3	membrane associated guanylate kinase, WW and PDZ domain containing 3 [Source:HGNC Symbol;Acc:HGNC:29647]
ENSG00000250640	0.952739	0	2.79286	0.896695	1.0609	0	0.950532	1.60217	0.298898	-2.4223	0.0485372	0.680167	OR7E41P	olfactory receptor family 7 subfamily E member 41 pseudogene [Source:HGNC Symbol;Acc:HGNC:8415]
ENSG00000155666	9.52739	4.82218	13.0333	2.69008	12.7308	1.81241	7.43604	11.7638	3.10822	-1.9202	0.0486478	0.680167	KDM8	lysine demethylase 8 [Source:HGNC Symbol;Acc:HGNC:25840]
ENSG00000170356	2.85822	6.02772	2.79286	4.48347	1.0609	2.71861	3.32363	2.23733	4.40994	0.978982	0.0488298	0.680167	OR2A20P	olfactory receptor family 2 subfamily A member 20 pseudogene [Source:HGNC Symbol;Acc:HGNC:15413]
ENSG00000171533	6.66917	2.41109	9.30953	3.58678	4.2436	1.81241	4.6721	6.74077	2.60342	-1.3725	0.0490906	0.680167	MAP6	microtubule associated protein 6 [Source:HGNC Symbol;Acc:HGNC:6868]
ENSG00000161904	0.952739	2.41109	0	1.79339	1.0609	1.81241	1.33842	0.671213	2.00563	1.57921	0.049091	0.680167	LEMD2	LEM domain containing 2 [Source:HGNC Symbol;Acc:HGNC:21244]
ENSG00000232160	38.1096	66.305	29.7905	73.529	20.1571	39.8729	44.6273	29.3524	59.9023	1.02913	0.0491381	0.680167	RAP2C-AS1	RAP2C antisense RNA 1 [Source:HGNC Symbol;Acc:HGNC:40957]
ENSG00000162062	0.952739	0	1.86191	0	3.1827	0.906203	1.15059	1.99912	0.302068	-2.72642	0.0491822	0.680167	TEDC2	tubulin epsilon and delta complex 2 [Source:HGNC Symbol;Acc:HGNC:25849]
ENSG00000224614	0.952739	0	1.86191	0	3.1827	0.906203	1.15059	1.99912	0.302068	-2.72642	0.0491822	0.680167	TNK2-AS1	TNK2 antisense RNA 1 [Source:HGNC Symbol;Acc:HGNC:49093]
ENSG00000256394	1.90548	3.61663	0	0.896695	0	0.906203	1.22083	0.635159	1.80651	1.50802	0.049212	0.680167	ASIC5	acid sensing ion channel subunit family member 5 [Source:HGNC Symbol;Acc:HGNC:17537]
ENSG00000166780	712.649	631.705	782.932	639.343	883.73	692.339	723.783	793.104	654.463	-0.277198	0.0493037	0.680167	BMERB1	bMERB domain containing 1 [Source:HGNC Symbol;Acc:HGNC:19213]
ENSG00000181827	11.4329	7.23327	3.72381	1.79339	6.3654	1.81241	5.39352	7.17403	3.61302	-0.989578	0.0493324	0.680167	RFX7	regulatory factor X7 [Source:HGNC Symbol;Acc:HGNC:25777]
ENSG00000245148	503.046	225.437	325.834	193.686	556.973	241.956	341.155	461.951	220.36	-1.06788	0.0493874	0.680167	ARAP1-AS2	ARAP1 antisense RNA 2 [Source:HGNC Symbol;Acc:HGNC:39994]
ENSG00000180861	0	1.20554	0	1.79339	0	2.71861	0.952924	0	1.90585	NA	0.0494661	0.680167	LINC01559	long intergenic non-protein coding RNA 1559 [Source:HGNC Symbol;Acc:HGNC:26598]
ENSG00000188596	0	1.20554	0	1.79339	0	2.71861	0.952924	0	1.90585	NA	0.0494661	0.680167	CFAP54	cilia and flagella associated protein 54 [Source:HGNC Symbol;Acc:HGNC:26456]
ENSG00000259551	0	1.20554	1.86191	4.48347	5.3045	8.15583	3.50188	2.3888	4.61495	0.950027	0.0495003	0.680167	AC048382.4	novel transcript
ENSG00000171206	2.85822	2.41109	1.86191	0.896695	1.0609	0	1.5148	1.92701	1.10259	-0.80546	0.0495409	0.680167	TRIM8	tripartite motif containing 8 [Source:HGNC Symbol;Acc:HGNC:15579]
ENSG00000163596	5.71643	2.41109	6.51667	4.48347	4.2436	2.71861	4.34831	5.49224	3.20439	-0.777344	0.0496088	0.680167	ICA1L	islet cell autoantigen 1 like [Source:HGNC Symbol;Acc:HGNC:14442]
ENSG00000245205	14.2911	9.64436	23.2738	17.0372	18.0353	15.4055	16.2812	18.5334	14.029	-0.401716	0.0497103	0.680167	EEF1A1P4	eukaryotic translation elongation factor 1 alpha 1 pseudogene 4 [Source:HGNC Symbol;Acc:HGNC:3199]
ENSG00000149262	7.62191	13.261	5.58572	15.2438	2.1218	15.4055	9.87328	5.10981	14.6368	1.51825	0.0497313	0.680167	INTS4	integrator complex subunit 4 [Source:HGNC Symbol;Acc:HGNC:25048]
ENSG00000186118	2.85822	7.23327	3.72381	13.4504	1.0609	7.24963	5.92937	2.54764	9.31111	1.86979	0.0499667	0.680167	TEX38	testis expressed 38 [Source:HGNC Symbol;Acc:HGNC:29589]
ENSG00000154174	0	12.0554	7.44762	13.4504	0	14.4993	7.90879	2.48254	13.335	2.42533	0.0501141	0.680167	TOMM70	translocase of outer mitochondrial membrane 70 [Source:HGNC Symbol;Acc:HGNC:11985]
ENSG00000180879	12.3856	14.4665	8.37858	9.86364	6.3654	7.24963	9.7849	9.0432	10.5266	0.219135	0.050187	0.680167	SSR4	signal sequence receptor subunit 4 [Source:HGNC Symbol;Acc:HGNC:11326]
ENSG00000006695	3.81096	9.64436	0	10.7603	0	5.43722	4.94214	1.27032	8.61397	2.76149	0.050293	0.680167	COX10	cytochrome c oxidase assembly factor heme A:farnesyltransferase COX10 [Source:HGNC Symbol;Acc:HGNC:2260]
ENSG00000163565	1.90548	1.20554	0.930953	0	4.2436	2.71861	1.83403	2.36001	1.30805	-0.851375	0.0504737	0.680167	IFI16	interferon gamma inducible protein 16 [Source:HGNC Symbol;Acc:HGNC:5395]
ENSG00000100219	0.952739	4.82218	2.79286	4.48347	1.0609	3.62481	2.95616	1.60217	4.31016	1.42772	0.0505468	0.680167	XBP1	X-box binding protein 1 [Source:HGNC Symbol;Acc:HGNC:12801]
ENSG00000161920	6.66917	4.82218	3.72381	0.896695	4.2436	0	3.39258	4.87886	1.90629	-1.35578	0.0506429	0.680167	MED11	mediator complex subunit 11 [Source:HGNC Symbol;Acc:HGNC:32687]
ENSG00000258777	49.5424	24.1109	53.0643	30.4876	28.6443	18.1241	33.9956	43.7504	24.2409	-0.851854	0.0507221	0.680167	HIF1A-AS1	HIF1A antisense RNA 1 [Source:HGNC Symbol;Acc:HGNC:43014]
ENSG00000119718	43.826	49.4273	26.0667	30.4876	15.9135	25.3737	31.8491	28.6021	35.0962	0.295196	0.0507583	0.680167	EIF2B2	eukaryotic translation initiation factor 2B subunit beta [Source:HGNC Symbol;Acc:HGNC:3258]
ENSG00000264272	24.7712	30.1386	12.1024	20.624	7.42631	19.9365	19.1665	14.7666	23.5664	0.674387	0.0509745	0.680167	AC100786.2	novel transcript, antisense to TTYH2
ENSG00000072518	3.81096	0	1.86191	0	2.1218	0	1.29911	2.59822	0	NA	0.0510976	0.680167	MARK2	microtubule affinity regulating kinase 2 [Source:HGNC Symbol;Acc:HGNC:3332]
ENSG00000082126	1.90548	0	0.930953	0	1.0609	0	0.649555	1.29911	0	NA	0.0510976	0.680167	MPP4	membrane palmitoylated protein 4 [Source:HGNC Symbol;Acc:HGNC:13680]
ENSG00000113273	1.90548	0	0.930953	0	1.0609	0	0.649555	1.29911	0	NA	0.0510976	0.680167	ARSB	arylsulfatase B [Source:HGNC Symbol;Acc:HGNC:714]
ENSG00000123131	1.90548	0	0.930953	0	1.0609	0	0.649555	1.29911	0	NA	0.0510976	0.680167	PRDX4	peroxiredoxin 4 [Source:HGNC Symbol;Acc:HGNC:17169]
ENSG00000171476	1.90548	0	0.930953	0	1.0609	0	0.649555	1.29911	0	NA	0.0510976	0.680167	HOPX	HOP homeobox [Source:HGNC Symbol;Acc:HGNC:24961]
ENSG00000174021	1.90548	0	0.930953	0	1.0609	0	0.649555	1.29911	0	NA	0.0510976	0.680167	GNG5	G protein subunit gamma 5 [Source:HGNC Symbol;Acc:HGNC:4408]
ENSG00000264392	1.90548	0	0.930953	0	1.0609	0	0.649555	1.29911	0	NA	0.0510976	0.680167	NA	NA
ENSG00000278581	1.90548	0	0.930953	0	1.0609	0	0.649555	1.29911	0	NA	0.0510976	0.680167	MIR6080	microRNA 6080 [Source:HGNC Symbol;Acc:HGNC:50142]
ENSG00000226017	111.47	77.1549	89.3715	74.4257	111.395	88.8079	92.1042	104.079	80.1295	-0.377272	0.0511155	0.680167	PRICKLE2-AS3	PRICKLE2 antisense RNA 3 [Source:HGNC Symbol;Acc:HGNC:40918]
ENSG00000198746	0.952739	0	3.72381	1.79339	1.0609	0	1.25514	1.91248	0.597797	-1.67772	0.0511857	0.680167	GPATCH3	G-patch domain containing 3 [Source:HGNC Symbol;Acc:HGNC:25720]
ENSG00000184792	10.4801	2.41109	5.58572	1.79339	7.42631	2.71861	5.06921	7.83072	2.3077	-1.76269	0.051197	0.680167	OSBP2	oxysterol binding protein 2 [Source:HGNC Symbol;Acc:HGNC:8504]
ENSG00000225062	1.90548	0	0.930953	0	3.1827	0.906203	1.15422	2.00638	0.302068	-2.73165	0.0512053	0.680167	CATIP-AS1	CATIP antisense RNA 1 [Source:HGNC Symbol;Acc:HGNC:41080]
ENSG00000253356	66.6917	77.1549	70.7524	82.4959	46.6796	67.9652	68.6233	61.3746	75.872	0.305926	0.051236	0.680167	AC084024.3	novel transcript
ENSG00000114316	2.85822	2.41109	3.72381	2.69008	1.0609	0	2.12402	2.54764	1.70039	-0.583297	0.0515623	0.680167	USP4	ubiquitin specific peptidase 4 [Source:HGNC Symbol;Acc:HGNC:12627]
ENSG00000275956	2.85822	0	3.72381	1.79339	2.1218	0.906203	1.90057	2.90128	0.899864	-1.68891	0.0520774	0.680167	AC104446.2	zinc finger protein 610 (ZNF610) pseudogene
ENSG00000203730	6.66917	0	3.72381	0.896695	8.48721	1.81241	3.59822	6.2934	0.903034	-2.80099	0.0521483	0.680167	TEDDM1	transmembrane epididymal protein 1 [Source:HGNC Symbol;Acc:HGNC:30233]
ENSG00000129422	2.85822	1.20554	5.58572	1.79339	4.2436	1.81241	2.91648	4.22918	1.60378	-1.3989	0.0523074	0.680167	MTUS1	microtubule associated scaffold protein 1 [Source:HGNC Symbol;Acc:HGNC:29789]
ENSG00000134001	0.952739	4.82218	0	4.48347	0	1.81241	2.0118	0.31758	3.70602	3.54468	0.0523952	0.680167	EIF2S1	eukaryotic translation initiation factor 2 subunit alpha [Source:HGNC Symbol;Acc:HGNC:3265]
ENSG00000159086	0.952739	2.41109	8.37858	8.96695	4.2436	5.43722	5.06503	4.52497	5.60509	0.308827	0.0523974	0.680167	PAXBP1	PAX3 and PAX7 binding protein 1 [Source:HGNC Symbol;Acc:HGNC:13579]
ENSG00000126775	0.952739	2.41109	0	3.58678	0	2.71861	1.61154	0.31758	2.90549	3.19359	0.052553	0.680167	ATG14	autophagy related 14 [Source:HGNC Symbol;Acc:HGNC:19962]
ENSG00000254138	1.90548	8.43881	27.9286	43.0414	15.9135	31.7171	21.4908	15.2492	27.7324	0.862841	0.0525897	0.680167	AC113386.1	novel transcript
ENSG00000234149	228.657	320.675	216.912	272.595	206.876	248.3	249.002	217.482	280.523	0.367226	0.0526146	0.680167	AC018511.2	novel transcript
ENSG00000187109	2.85822	0	2.79286	0.896695	2.1218	0.906203	1.59596	2.59096	0.600966	-2.10813	0.0528323	0.680167	NAP1L1	nucleosome assembly protein 1 like 1 [Source:HGNC Symbol;Acc:HGNC:7637]
ENSG00000166363	28.5822	14.4665	6.51667	0	12.7308	4.53102	11.1379	15.9432	6.33252	-1.33209	0.0529603	0.680167	OR10A5	olfactory receptor family 10 subfamily A member 5 [Source:HGNC Symbol;Acc:HGNC:15131]
ENSG00000260249	49.5424	2.41109	26.9976	8.07025	49.8623	9.06203	24.3243	42.1341	6.51446	-2.69327	0.0530024	0.680167	AC007608.3	novel transcript, antisense to SNX20
ENSG00000149716	206.744	333.936	111.714	187.409	201.571	259.174	216.758	173.343	260.173	0.585839	0.0530883	0.680167	LTO1	LTO1 maturation factor of ABCE1 [Source:HGNC Symbol;Acc:HGNC:17589]
ENSG00000253172	17.1493	7.23327	12.1024	5.38017	22.2789	18.1241	13.7114	17.1769	10.2458	-0.74543	0.0532302	0.680167	AC008378.2	novel transcript
ENSG00000261195	20.0075	33.7552	25.1357	51.1116	32.8879	67.059	38.3262	26.0104	50.642	0.961245	0.0534276	0.680167	AC027130.1	novel transcript, antisense to IQCK
ENSG00000243979	0	1.20554	0	1.79339	1.0609	1.81241	0.978707	0.353634	1.60378	2.18115	0.0535659	0.680167	AC087752.1	ribosomal protein L17 (RPL17) pseudogene
ENSG00000143110	2.85822	0	1.86191	0	2.1218	0.906203	1.29135	2.28064	0.302068	-2.9165	0.0536561	0.680167	C1orf162	chromosome 1 open reading frame 162 [Source:HGNC Symbol;Acc:HGNC:28344]
ENSG00000269179	61.928	39.783	46.5477	37.6612	53.045	36.2481	45.8688	53.8402	37.8974	-0.506585	0.0536955	0.680167	AC011452.2	novel protein
ENSG00000147475	6.66917	12.0554	11.1714	13.4504	5.3045	10.8744	9.9209	7.71504	12.1268	0.65245	0.0538797	0.680167	ERLIN2	ER lipid raft associated 2 [Source:HGNC Symbol;Acc:HGNC:1356]
ENSG00000269926	239.138	173.598	240.186	91.4629	229.155	138.649	185.365	236.159	134.57	-0.811402	0.0541162	0.680167	DDIT4-AS1	DDIT4 antisense RNA 1 [Source:HGNC Symbol;Acc:HGNC:52379]
ENSG00000272434	77.1719	102.471	80.062	140.781	45.6187	86.0893	88.699	67.6175	109.781	0.699154	0.0544233	0.680167	AC137630.3	novel transcript, antisense to IMPDH2 and QRICH1
ENSG00000151376	1.90548	6.02772	1.86191	3.58678	0	2.71861	2.68342	1.25579	4.11104	1.7109	0.0545162	0.680167	ME3	malic enzyme 3 [Source:HGNC Symbol;Acc:HGNC:6985]
ENSG00000162885	4.7637	7.23327	5.58572	9.86364	5.3045	7.24963	6.66674	5.21797	8.11551	0.637193	0.0546406	0.680167	B3GALNT2	beta-1,3-N-acetylgalactosaminyltransferase 2 [Source:HGNC Symbol;Acc:HGNC:28596]
ENSG00000160688	1.90548	3.61663	3.72381	8.07025	1.0609	4.53102	3.81802	2.23006	5.40597	1.27747	0.0546859	0.680167	FLAD1	flavin adenine dinucleotide synthetase 1 [Source:HGNC Symbol;Acc:HGNC:24671]
ENSG00000264577	4251.12	6749.84	5530.79	7236.33	4281.8	5307.63	5559.59	4687.9	6431.27	0.45616	0.0547504	0.680167	AC010761.1	novel transcript, antisense to RPL23A
ENSG00000185670	1.90548	6.02772	0	1.79339	0	4.53102	2.37627	0.635159	4.11738	2.69653	0.0550477	0.680167	ZBTB3	zinc finger and BTB domain containing 3 [Source:NCBI gene;Acc:79842]
ENSG00000259948	36.2041	51.8384	55.8572	63.6653	56.2277	76.1211	56.6523	49.4297	63.8749	0.369873	0.0551069	0.680167	AC124068.1	VAMP (vesicle-associated membrane protein)-associated protein A, 33kDa (VAPA) pseudogene
ENSG00000205710	65.739	34.9608	72.6143	19.7273	117.76	41.6853	58.7478	85.3711	32.1245	-1.41008	0.0553567	0.680167	C17orf107	chromosome 17 open reading frame 107 [Source:HGNC Symbol;Acc:HGNC:37238]
ENSG00000253197	49.5424	44.6051	50.2715	42.1447	39.2533	27.1861	42.1672	46.3557	37.9786	-0.28756	0.0555869	0.680167	AC117834.1	novel transcript
ENSG00000100122	0	2.41109	0	1.79339	3.1827	7.24963	2.43947	1.0609	3.81803	1.84754	0.0555962	0.680167	CRYBB1	crystallin beta B1 [Source:HGNC Symbol;Acc:HGNC:2397]
ENSG00000240524	1.90548	6.02772	0.930953	2.69008	1.0609	3.62481	2.70666	1.29911	4.11421	1.66309	0.0556893	0.680167	NA	NA
ENSG00000169727	19.0548	16.8776	11.1714	9.86364	12.7308	11.7806	13.5798	14.319	12.8406	-0.157215	0.0557048	0.680167	GPS1	G protein pathway suppressor 1 [Source:HGNC Symbol;Acc:HGNC:4549]
ENSG00000277501	36.2041	39.783	30.7215	34.0744	27.5834	28.9985	32.8941	31.503	34.2853	0.122101	0.0558625	0.680167	AC243571.2	novel transcript, antisense DDX52
ENSG00000239388	143.864	166.365	122.886	172.165	96.542	124.15	137.662	121.097	154.227	0.348889	0.0562577	0.680167	ASB14	ankyrin repeat and SOCS box containing 14 [Source:HGNC Symbol;Acc:HGNC:19766]
ENSG00000147509	5.71643	8.43881	3.72381	10.7603	5.3045	10.8744	7.46972	4.91492	10.0245	1.0283	0.0562975	0.680167	RGS20	regulator of G protein signaling 20 [Source:HGNC Symbol;Acc:HGNC:14600]
ENSG00000152348	2639.09	3762.5	2827.3	4384.84	2195	2810.14	3103.15	2553.8	3652.49	0.516237	0.0562991	0.680167	ATG10	autophagy related 10 [Source:HGNC Symbol;Acc:HGNC:20315]
ENSG00000255435	259.145	284.509	230.876	265.422	230.215	243.769	252.323	240.079	264.566	0.14012	0.056404	0.680167	AP001267.3	novel transcript, antisense to MLL and TTC36
ENSG00000224401	11.4329	8.43881	19.55	17.9339	9.54811	5.43722	12.0568	13.5103	10.6033	-0.349548	0.0564342	0.680167	RPL7P57	ribosomal protein L7 pseudogene 57 [Source:HGNC Symbol;Acc:HGNC:35901]
ENSG00000005810	0	4.82218	2.79286	15.2438	2.1218	11.7806	6.12688	1.63822	10.6155	2.69598	0.0564512	0.680167	MYCBP2	MYC binding protein 2 [Source:HGNC Symbol;Acc:HGNC:23386]
ENSG00000185467	3.81096	1.20554	4.65477	0	2.1218	0	1.96551	3.52917	0.401848	-3.13461	0.0564615	0.680167	KPNA7	karyopherin subunit alpha 7 [Source:HGNC Symbol;Acc:HGNC:21839]
ENSG00000126838	20.0075	26.522	65.1667	79.8058	4.2436	12.6868	34.7388	29.8059	39.6716	0.412505	0.0565315	0.680167	PZP	PZP alpha-2-macroglobulin like [Source:HGNC Symbol;Acc:HGNC:9750]
ENSG00000163155	8.57465	2.41109	10.2405	2.69008	7.42631	4.53102	5.97894	8.74715	3.21073	-1.44591	0.0568742	0.680167	LYSMD1	LysM domain containing 1 [Source:HGNC Symbol;Acc:HGNC:32070]
ENSG00000141837	6.66917	1.20554	8.37858	1.79339	13.7917	1.81241	5.60847	9.61315	1.60378	-2.58353	0.0576548	0.680167	CACNA1A	calcium voltage-gated channel subunit alpha1 A [Source:HGNC Symbol;Acc:HGNC:1388]
ENSG00000072849	0	3.61663	0	1.79339	0	1.81241	1.20374	0	2.40748	NA	0.0576676	0.680167	DERL2	derlin 2 [Source:HGNC Symbol;Acc:HGNC:17943]
ENSG00000145029	3.81096	12.0554	0.930953	7.17356	3.1827	6.34342	5.58284	2.64154	8.52414	1.69018	0.057755	0.680167	NICN1	nicolin 1 [Source:HGNC Symbol;Acc:HGNC:18317]
ENSG00000176974	9.52739	6.02772	13.0333	4.48347	12.7308	7.24963	8.84206	11.7638	5.92027	-0.990624	0.0577794	0.680167	SHMT1	serine hydroxymethyltransferase 1 [Source:HGNC Symbol;Acc:HGNC:10850]
ENSG00000136457	36.2041	20.4943	27.9286	21.5207	31.827	21.7489	26.6206	31.9866	21.2546	-0.589691	0.0580549	0.680167	CHAD	chondroadherin [Source:HGNC Symbol;Acc:HGNC:1909]
ENSG00000143514	2.85822	3.61663	0	0.896695	1.0609	2.71861	1.85851	1.30637	2.41065	0.883853	0.0585298	0.680167	TP53BP2	tumor protein p53 binding protein 2 [Source:HGNC Symbol;Acc:HGNC:12000]
ENSG00000259342	278.2	159.132	247.634	98.6364	92.2984	36.2481	152.025	206.044	98.0055	-1.07202	0.0586822	0.680167	AC025580.1	novel transcript, antisense to C15orf48
ENSG00000225614	64.7863	21.6998	92.1644	62.7686	84.8721	67.9652	65.7094	80.6076	50.8112	-0.665768	0.0587593	0.680167	ZNF469	zinc finger protein 469 [Source:HGNC Symbol;Acc:HGNC:23216]
ENSG00000271936	77.1719	124.171	68.8905	107.603	109.273	126.868	102.33	85.1117	119.548	0.490156	0.0589571	0.680167	AC012073.1	novel transcript, antisense to ADCY3
ENSG00000259945	18.102	25.3164	16.7572	19.7273	8.48721	16.3117	17.4503	14.4488	20.4518	0.501278	0.0590073	0.680167	AC027682.2	novel transcript, antisense to FAM65A
ENSG00000114030	4.7637	6.02772	5.58572	8.96695	11.6699	14.4993	8.58554	7.33977	9.83131	0.421648	0.0590875	0.680167	KPNA1	karyopherin subunit alpha 1 [Source:HGNC Symbol;Acc:HGNC:6394]
ENSG00000259783	56.2116	49.4273	66.0977	53.8017	95.4811	77.9335	66.4921	72.5968	60.3875	-0.265656	0.0590928	0.680167	LINC02259	long intergenic non-protein coding RNA 2259 [Source:HGNC Symbol;Acc:HGNC:53172]
ENSG00000233231	39.0623	26.522	30.7215	16.1405	49.8623	44.404	34.4521	39.882	29.0221	-0.458585	0.0591037	0.680167	HNRNPA1P49	heterogeneous nuclear ribonucleoprotein A1 pseudogene 49 [Source:HGNC Symbol;Acc:HGNC:48779]
ENSG00000102908	5.71643	3.61663	6.51667	0.896695	7.42631	2.71861	4.48189	6.55314	2.41065	-1.44277	0.0591377	0.680167	NFAT5	nuclear factor of activated T cells 5 [Source:HGNC Symbol;Acc:HGNC:7774]
ENSG00000146826	3.81096	0	4.65477	2.69008	10.609	5.43722	4.53367	6.35824	2.7091	-1.23081	0.0591615	0.680167	MAP11	microtubule associated protein 11 [Source:HGNC Symbol;Acc:HGNC:25604]
ENSG00000100146	1.90548	6.02772	6.51667	10.7603	7.42631	9.06203	6.94976	5.28282	8.6167	0.705827	0.0592568	0.680167	SOX10	SRY-box transcription factor 10 [Source:HGNC Symbol;Acc:HGNC:11190]
ENSG00000159917	77.1719	116.938	90.3024	105.81	56.2277	83.3707	88.3034	74.5674	102.04	0.452512	0.0592897	0.680167	ZNF235	zinc finger protein 235 [Source:HGNC Symbol;Acc:HGNC:12866]
ENSG00000187323	7.62191	2.41109	36.3072	26.0042	13.7917	0	14.356	19.2403	9.47175	-1.02243	0.0593213	0.680167	DCC	DCC netrin 1 receptor [Source:HGNC Symbol;Acc:HGNC:2701]
ENSG00000206203	8.57465	4.82218	6.51667	3.58678	8.48721	1.81241	5.63332	7.85951	3.40712	-1.20589	0.0593892	0.680167	TSSK2	testis specific serine kinase 2 [Source:HGNC Symbol;Acc:HGNC:11401]
ENSG00000078053	3.81096	6.02772	0.930953	1.79339	2.1218	3.62481	3.05161	2.2879	3.81531	0.737773	0.0597629	0.680167	AMPH	amphiphysin [Source:HGNC Symbol;Acc:HGNC:471]
ENSG00000236467	54.3061	94.0325	160.124	190.099	59.4104	74.3087	105.38	91.2802	119.48	0.388398	0.0597678	0.680167	KCNMA1-AS1	KCNMA1 antisense RNA 1 [Source:HGNC Symbol;Acc:HGNC:51213]
ENSG00000268650	17.1493	24.1109	6.51667	21.5207	2.1218	9.96823	13.5646	8.59593	18.5333	1.10839	0.05982	0.680167	AC005759.1	novel transcript, antisense to PDE4C
ENSG00000113558	0	2.41109	0	1.79339	0	0.906203	0.85178	0	1.70356	NA	0.0598818	0.680167	SKP1	S-phase kinase associated protein 1 [Source:HGNC Symbol;Acc:HGNC:10899]
ENSG00000243276	0	2.41109	0	1.79339	0	0.906203	0.85178	0	1.70356	NA	0.0598818	0.680167	AC068633.1	novel transcript
ENSG00000250536	2.85822	6.02772	1.86191	5.38017	3.1827	9.96823	4.87983	2.63428	7.12538	1.43556	0.0599055	0.680167	ABHD17AP3	abhydrolase domain containing 17A pseudogene 3 [Source:HGNC Symbol;Acc:HGNC:34041]
ENSG00000234281	158.155	215.792	203.879	259.145	113.516	228.363	196.475	158.517	234.433	0.564545	0.0599622	0.680167	LANCL1-AS1	LANCL1 antisense RNA 1 [Source:HGNC Symbol;Acc:HGNC:50727]
ENSG00000176890	27.6294	18.0832	48.4096	41.248	58.3495	41.6853	39.2342	44.7962	33.6722	-0.411819	0.0599776	0.680167	TYMS	thymidylate synthetase [Source:HGNC Symbol;Acc:HGNC:12441]
ENSG00000244161	419.205	720.916	399.379	667.141	406.325	518.348	521.886	408.303	635.468	0.63818	0.0601845	0.680167	FLNB-AS1	FLNB antisense RNA 1 [Source:HGNC Symbol;Acc:HGNC:40239]
ENSG00000215861	21.913	10.8499	40.9619	19.7273	51.9841	22.6551	28.0152	38.2864	17.7441	-1.10949	0.0602534	0.680167	AC245297.1	phosphodiesterase 4D interacting protein (myomegalin) (PDE4DIP) pseudogene
ENSG00000223901	141.958	125.377	135.919	129.124	118.821	100.589	125.298	132.233	118.363	-0.15986	0.060297	0.680167	AP001469.1	novel transcript
ENSG00000115459	100.038	59.0717	52.1334	35.8678	62.5931	36.2481	57.6586	71.588	43.7292	-0.711122	0.0603154	0.680167	ELMOD3	ELMO domain containing 3 [Source:HGNC Symbol;Acc:HGNC:26158]
ENSG00000271980	224.846	323.086	222.498	260.938	182.475	247.393	243.539	209.94	277.139	0.400636	0.060341	0.680167	AC012640.6	novel transcript, antisense to CCT5
ENSG00000270953	20.0075	30.1386	54.9262	78.9091	23.3398	50.7474	43.0115	32.7579	53.265	0.701348	0.0603813	0.680167	AC007938.3	novel transcript, antisense to COPG2
ENSG00000259899	13.3383	16.8776	13.0333	15.2438	11.6699	17.2179	14.5635	12.6805	16.4464	0.375159	0.0604066	0.680167	AC010333.2	novel transcript, antisense to a novel protein
ENSG00000165828	3.81096	8.43881	1.86191	11.657	3.1827	8.15583	6.18454	2.95185	9.41722	1.67368	0.0605648	0.680167	PRAP1	proline rich acidic protein 1 [Source:HGNC Symbol;Acc:HGNC:23304]
ENSG00000172425	0	2.41109	0	0.896695	0	1.81241	0.853365	0	1.70673	NA	0.0605818	0.680167	TTC36	tetratricopeptide repeat domain 36 [Source:HGNC Symbol;Acc:HGNC:33708]
ENSG00000177406	0	2.41109	0	0.896695	0	1.81241	0.853365	0	1.70673	NA	0.0605818	0.680167	NINJ2-AS1	NINJ2 antisense RNA 1 [Source:HGNC Symbol;Acc:HGNC:40405]
ENSG00000228661	0	2.41109	0	0.896695	0	1.81241	0.853365	0	1.70673	NA	0.0605818	0.680167	AC090587.1	novel transcript
ENSG00000276166	22.8657	10.8499	40.031	12.5537	42.436	27.1861	25.9871	35.1109	16.8632	-1.05804	0.0605873	0.680167	AC092118.2	novel transcript, antisense to KIFC3
ENSG00000225313	825.072	534.056	825.755	524.566	1156.38	550.972	736.134	935.736	536.531	-0.80244	0.0607389	0.680167	AL513327.1	novel transcript
ENSG00000183208	14.2911	12.0554	16.7572	11.657	16.9744	10.8744	13.7683	16.0076	11.529	-0.473489	0.0608216	0.680167	GDPGP1	GDP-D-glucose phosphorylase 1 [Source:HGNC Symbol;Acc:HGNC:34360]
ENSG00000233367	163.871	173.598	192.707	218.794	161.257	180.334	181.76	172.612	190.909	0.145353	0.0609973	0.680167	AL133480.1	novel transcript
ENSG00000279047	12.3856	38.5774	47.4786	59.1819	53.045	67.059	46.2879	37.6364	54.9394	0.545713	0.0613217	0.680167	AC244517.5	novel transcript, antisense to PCDHB1 and PCDHB2
ENSG00000275023	0	3.61663	0	2.69008	0	6.34342	2.10836	0	4.21671	NA	0.0614497	0.680167	MLLT6	MLLT6, PHD finger containing [Source:HGNC Symbol;Acc:HGNC:7138]
ENSG00000215375	501.141	660.638	461.753	720.943	349.036	453.102	524.435	437.31	611.561	0.48384	0.061631	0.680167	MYL5	myosin light chain 5 [Source:HGNC Symbol;Acc:HGNC:7586]
ENSG00000261266	30.4876	37.3719	21.4119	40.3513	25.4616	41.6853	32.7949	25.7871	39.8028	0.626224	0.0616457	0.680167	AC008870.4	novel transcript
ENSG00000126351	25.724	40.9885	14.8952	21.5207	10.609	19.0303	22.1279	17.0761	27.1798	0.67056	0.0616487	0.680167	THRA	thyroid hormone receptor alpha [Source:HGNC Symbol;Acc:HGNC:11796]
ENSG00000187747	0	1.20554	4.65477	6.27686	2.1218	2.71861	2.8296	2.25886	3.40034	0.590087	0.0617824	0.680167	OR52B6	olfactory receptor family 52 subfamily B member 6 [Source:HGNC Symbol;Acc:HGNC:15211]
ENSG00000272941	21.913	26.522	24.2048	28.6942	25.4616	27.1861	25.6636	23.8598	27.4674	0.20314	0.0619408	0.680167	AC083862.2	novel transcript, antisense to C7orf49
ENSG00000188501	24.7712	36.1663	12.1024	17.0372	19.0962	25.3737	22.4245	18.6566	26.1924	0.489462	0.0619442	0.680167	LCTL	lactase like [Source:HGNC Symbol;Acc:HGNC:15583]
ENSG00000137776	0.952739	0	2.79286	0.896695	5.3045	2.71861	2.1109	3.0167	1.2051	-1.32382	0.0619895	0.680167	SLTM	SAFB like transcription modulator [Source:HGNC Symbol;Acc:HGNC:20709]
ENSG00000132773	25.724	31.3442	26.0667	35.8678	29.7052	44.404	32.1853	27.1653	37.2053	0.453744	0.0619964	0.680167	TOE1	target of EGR1, exonuclease [Source:HGNC Symbol;Acc:HGNC:15954]
ENSG00000147100	1.90548	4.82218	4.65477	10.7603	4.2436	7.24963	5.606	3.60128	7.61071	1.07952	0.0620738	0.680167	SLC16A2	solute carrier family 16 member 2 [Source:HGNC Symbol;Acc:HGNC:10923]
ENSG00000005448	3.81096	6.02772	3.72381	9.86364	2.1218	7.24963	5.46626	3.21886	7.71366	1.26087	0.0621299	0.680167	WDR54	WD repeat domain 54 [Source:HGNC Symbol;Acc:HGNC:25770]
ENSG00000269583	60.9753	80.7715	29.7905	38.5579	45.6187	56.1846	51.9831	45.4615	58.5047	0.363906	0.0622617	0.680167	L34079.3	novel transcript, antisense to XRCC1
ENSG00000130429	7.62191	1.20554	2.79286	0	5.3045	1.81241	3.12287	5.23976	1.00598	-2.38089	0.0623551	0.680167	ARPC1B	actin related protein 2/3 complex subunit 1B [Source:HGNC Symbol;Acc:HGNC:704]
ENSG00000232871	15.2438	34.9608	25.1357	32.281	7.42631	22.6551	22.9505	15.9353	29.9656	0.911084	0.0623696	0.680167	SEC1P	secretory blood group 1, pseudogene [Source:HGNC Symbol;Acc:HGNC:44149]
ENSG00000267469	0.952739	0	1.86191	0	5.3045	2.71861	1.80629	2.70638	0.906203	-1.57846	0.0624935	0.680167	AC005944.1	novel transcript, antisense to AES
ENSG00000127423	7.62191	1.20554	5.58572	2.69008	4.2436	0.906203	3.70884	5.81708	1.60061	-1.86167	0.0625652	0.680167	AUNIP	aurora kinase A and ninein interacting protein [Source:HGNC Symbol;Acc:HGNC:28363]
ENSG00000262147	0	3.61663	1.86191	4.48347	9.54811	10.8744	5.06409	3.80334	6.32485	0.733765	0.0627112	0.680167	AC124283.2	novel transcript, antisense FOXK2
ENSG00000135424	0.952739	7.23327	0.930953	8.07025	1.0609	3.62481	3.64549	0.981531	6.30944	2.68441	0.06296	0.680167	ITGA7	integrin subunit alpha 7 [Source:HGNC Symbol;Acc:HGNC:6143]
ENSG00000204296	2.85822	26.522	21.4119	57.3885	24.4007	38.0605	28.4403	16.2236	40.657	1.32541	0.063224	0.680167	TSBP1	testis expressed basic protein 1 [Source:HGNC Symbol;Acc:HGNC:13922]
ENSG00000264578	781.246	582.278	518.541	431.31	764.909	520.161	599.741	688.232	511.25	-0.428867	0.0633069	0.680167	AC009630.3	novel transcript, antisense to AGPAT6
ENSG00000138641	116.234	149.488	111.714	132.711	98.6638	152.242	126.842	108.871	144.813	0.411579	0.0633134	0.680167	HERC3	HECT and RLD domain containing E3 ubiquitin protein ligase 3 [Source:HGNC Symbol;Acc:HGNC:4876]
ENSG00000261819	25.724	18.0832	19.55	16.1405	15.9135	6.34342	16.9591	20.3958	13.5224	-0.592926	0.0634632	0.680167	AC138932.4	novel pseudogene KIAA2013
ENSG00000164975	24.7712	28.9331	26.9976	38.5579	22.2789	30.8109	28.7249	24.6826	32.7673	0.408762	0.0638664	0.680167	SNAPC3	small nuclear RNA activating complex polypeptide 3 [Source:HGNC Symbol;Acc:HGNC:11136]
ENSG00000198658	3.81096	6.02772	10.2405	14.3471	12.7308	14.4993	10.2761	8.92742	11.6247	0.380878	0.0638708	0.680167	ABHD17AP1	abhydrolase domain containing 17A pseudogene 1 [Source:HGNC Symbol;Acc:HGNC:28394]
ENSG00000171505	4.7637	2.41109	4.65477	0	2.1218	0	2.32523	3.84675	0.803696	-2.25892	0.0639129	0.680167	OR1N1	olfactory receptor family 1 subfamily N member 1 [Source:HGNC Symbol;Acc:HGNC:8221]
ENSG00000136108	0	2.41109	0.930953	1.79339	0	1.81241	1.15797	0.310318	2.00563	2.69224	0.0640147	0.680167	CKAP2	cytoskeleton associated protein 2 [Source:HGNC Symbol;Acc:HGNC:1990]
ENSG00000131484	0	1.20554	3.72381	5.38017	2.1218	2.71861	2.52499	1.94854	3.10144	0.670547	0.0641572	0.680167	AC091132.1	novel transcript
ENSG00000249772	104.801	113.321	82.8548	97.7397	113.516	119.619	105.309	100.391	110.227	0.134845	0.0641658	0.680167	AC026427.1	novel transcript
ENSG00000232133	789.821	274.864	558.572	326.397	1038.62	382.418	561.782	795.671	327.893	-1.27895	0.0642491	0.680167	IMPDH1P10	inosine monophosphate dehydrogenase 1 pseudogene 10 [Source:HGNC Symbol;Acc:HGNC:33965]
ENSG00000203993	8.57465	2.41109	3.72381	0	4.2436	1.81241	3.46093	5.51402	1.40783	-1.96963	0.06425	0.680167	ARRDC1-AS1	ARRDC1 antisense RNA 1 [Source:HGNC Symbol;Acc:HGNC:23395]
ENSG00000151276	0	2.41109	0.930953	6.27686	0	2.71861	2.05625	0.310318	3.80219	3.61501	0.0643377	0.680167	MAGI1	membrane associated guanylate kinase, WW and PDZ domain containing 1 [Source:HGNC Symbol;Acc:HGNC:946]
ENSG00000138075	3.81096	3.61663	1.86191	1.79339	1.0609	0.906203	2.175	2.24459	2.10541	-0.0923501	0.0643961	0.680167	ABCG5	ATP binding cassette subfamily G member 5 [Source:HGNC Symbol;Acc:HGNC:13886]
ENSG00000255438	456.362	333.936	552.986	509.323	423.299	332.577	434.747	477.549	391.945	-0.284998	0.0645946	0.680167	AL354813.1	novel transcript, antisense to SULF2
ENSG00000229334	86.6993	103.677	116.369	133.608	77.4458	113.275	105.179	93.5047	116.853	0.321587	0.0646014	0.680167	AC046143.1	novel transcript
ENSG00000083812	1.90548	3.61663	9.30953	10.7603	8.48721	11.7806	7.6433	6.56741	8.7192	0.408873	0.0647181	0.680167	ZNF324	zinc finger protein 324 [Source:HGNC Symbol;Acc:HGNC:14096]
ENSG00000176623	23.8185	31.3442	36.3072	46.6281	24.4007	28.0923	31.7652	28.1755	35.3549	0.32747	0.064755	0.680167	RMDN1	regulator of microtubule dynamics 1 [Source:HGNC Symbol;Acc:HGNC:24285]
ENSG00000143924	13.3383	4.82218	34.4453	19.7273	15.9135	9.96823	16.3691	21.2324	11.5059	-0.883892	0.0647769	0.680167	EML4	EMAP like 4 [Source:HGNC Symbol;Acc:HGNC:1316]
ENSG00000135838	1.90548	0	5.58572	1.79339	5.3045	0	2.43152	4.26523	0.597797	-2.8349	0.0649481	0.680167	NPL	N-acetylneuraminate pyruvate lyase [Source:HGNC Symbol;Acc:HGNC:16781]
ENSG00000180901	386.812	600.361	409.619	556.848	294.93	372.449	436.837	363.787	509.886	0.48708	0.0652637	0.680167	KCTD2	potassium channel tetramerization domain containing 2 [Source:HGNC Symbol;Acc:HGNC:21294]
ENSG00000082516	2.85822	0	1.86191	0	1.0609	0	0.963504	1.92701	0	NA	0.0656891	0.680167	GEMIN5	gem nuclear organelle associated protein 5 [Source:HGNC Symbol;Acc:HGNC:20043]
ENSG00000100934	2.85822	0	1.86191	0	1.0609	0	0.963504	1.92701	0	NA	0.0656891	0.680167	SEC23A	Sec23 homolog A, coat complex II component [Source:HGNC Symbol;Acc:HGNC:10701]
ENSG00000228290	3.81096	2.41109	4.65477	0.896695	4.2436	1.81241	2.97159	4.23644	1.70673	-1.31162	0.0657028	0.680167	TBX18-AS1	TBX18 antisense RNA 1 [Source:HGNC Symbol;Acc:HGNC:52256]
ENSG00000179743	38.1096	28.9331	37.2381	24.2108	38.1924	33.5295	33.3689	37.8467	28.8911	-0.389542	0.0657446	0.680167	AL450998.2	novel transcript
ENSG00000116194	10.4801	15.6721	6.51667	20.624	10.609	19.9365	13.9731	9.20194	18.7442	1.02643	0.0657636	0.680167	ANGPTL1	angiopoietin like 1 [Source:HGNC Symbol;Acc:HGNC:489]
ENSG00000204469	4.7637	0	7.44762	0.896695	11.6699	0	4.12965	7.96041	0.298898	-4.73512	0.0658413	0.680167	PRRC2A	proline rich coiled-coil 2A [Source:HGNC Symbol;Acc:HGNC:13918]
ENSG00000144668	3.81096	13.261	10.2405	17.0372	3.1827	19.9365	11.2448	5.74471	16.7449	1.54341	0.0660669	0.680167	ITGA9	integrin subunit alpha 9 [Source:HGNC Symbol;Acc:HGNC:6145]
ENSG00000174945	280.105	236.287	215.981	146.161	280.078	253.737	235.392	258.721	212.062	-0.286916	0.066102	0.680167	AMZ1	archaelysin family metallopeptidase 1 [Source:HGNC Symbol;Acc:HGNC:22231]
ENSG00000254656	133.383	97.6491	43.7548	30.4876	107.151	84.2769	82.7838	94.7631	70.8045	-0.420483	0.0665157	0.680167	RTL1	retrotransposon Gag like 1 [Source:HGNC Symbol;Acc:HGNC:14665]
ENSG00000234678	121.951	188.065	149.883	180.236	208.997	241.05	181.697	160.277	203.117	0.341741	0.0666214	0.680167	ELF3-AS1	ELF3 antisense RNA 1 [Source:HGNC Symbol;Acc:HGNC:40211]
ENSG00000258168	401.103	448.463	512.955	632.17	349.036	487.537	471.877	421.032	522.723	0.312119	0.0669776	0.680167	AC025569.1	novel transcript, antisense to PTPRB
ENSG00000167995	73198	53204.3	59674.1	23342.8	84085.9	29030.2	53755.9	72319.3	35192.4	-1.03912	0.0670379	0.680167	BEST1	bestrophin 1 [Source:HGNC Symbol;Acc:HGNC:12703]
ENSG00000142453	1.90548	1.20554	3.72381	1.79339	7.42631	5.43722	3.58196	4.35187	2.81205	-0.630011	0.0670878	0.680167	CARM1	coactivator associated arginine methyltransferase 1 [Source:HGNC Symbol;Acc:HGNC:23393]
ENSG00000222007	18.102	14.4665	14.8952	10.7603	15.9135	14.4993	14.7728	16.3036	13.242	-0.300065	0.0671658	0.680167	AC064874.1	novel transcript, antisense to AGAP1
ENSG00000220937	2.85822	3.61663	0.930953	2.69008	0	0.906203	1.83368	1.26306	2.40431	0.928702	0.0672339	0.680167	HNRNPA1P41	heterogeneous nuclear ribonucleoprotein A1 pseudogene 41 [Source:HGNC Symbol;Acc:HGNC:48770]
ENSG00000230246	0	4.82218	0	13.4504	0	9.06203	4.55577	0	9.11154	NA	0.06728	0.680167	SPATA31C1	SPATA31 subfamily C member 1 [Source:HGNC Symbol;Acc:HGNC:27846]
ENSG00000177613	93.3684	68.716	49.3405	36.7645	79.5676	68.8714	66.1047	74.0922	58.1173	-0.350353	0.0674309	0.680167	CSTF2T	cleavage stimulation factor subunit 2 tau variant [Source:HGNC Symbol;Acc:HGNC:17086]
ENSG00000253875	128.62	173.598	166.641	224.174	132.613	152.242	162.981	142.624	183.338	0.362286	0.0674708	0.680167	AC013643.2	novel transcript
ENSG00000145022	0	2.41109	1.86191	2.69008	0	1.81241	1.46258	0.620635	2.30453	1.89265	0.0675718	0.680167	TCTA	T cell leukemia translocation altered [Source:HGNC Symbol;Acc:HGNC:11692]
ENSG00000249180	286.774	414.707	363.072	587.335	299.174	387.855	389.82	316.34	463.299	0.550468	0.0675932	0.680167	AC020900.1	novel transcript
ENSG00000160345	10.4801	12.0554	8.37858	12.5537	7.42631	9.96823	10.1437	8.76167	11.5258	0.395589	0.0677682	0.680167	C9orf116	chromosome 9 open reading frame 116 [Source:HGNC Symbol;Acc:HGNC:28435]
ENSG00000146282	0	2.41109	0.930953	3.58678	0	0.906203	1.30584	0.310318	2.30136	2.89067	0.0678817	0.680167	RARS2	arginyl-tRNA synthetase 2, mitochondrial [Source:HGNC Symbol;Acc:HGNC:21406]
ENSG00000253773	5.71643	7.23327	8.37858	8.96695	6.3654	7.24963	7.31838	6.82014	7.81661	0.196743	0.0679154	0.680167	C8orf37-AS1	C8orf37 antisense RNA 1 [Source:HGNC Symbol;Acc:HGNC:50444]
ENSG00000250234	37.1568	27.7275	35.3762	11.657	48.8014	20.8427	30.2603	40.4448	20.0757	-1.0105	0.0680811	0.680167	AC025754.1	novel transcript
ENSG00000254756	64.7863	90.4158	78.2001	93.2563	111.395	152.242	98.3825	84.7936	111.971	0.401103	0.0681911	0.680167	AP001107.6	novel transcript
ENSG00000134748	7.62191	3.61663	7.44762	4.48347	3.1827	1.81241	4.69413	6.08408	3.30417	-0.880751	0.06828	0.680167	PRPF38A	pre-mRNA processing factor 38A [Source:HGNC Symbol;Acc:HGNC:25930]
ENSG00000261632	322.979	343.58	242.048	297.703	244.007	304.484	292.467	269.678	315.256	0.225286	0.0683099	0.680167	AC022872.1	novel transcript, antisense to MYO9A
ENSG00000123505	40.9678	25.3164	27.9286	20.624	53.045	31.7171	33.2665	40.6471	25.8858	-0.65099	0.0684006	0.680167	AMD1	adenosylmethionine decarboxylase 1 [Source:HGNC Symbol;Acc:HGNC:457]
ENSG00000153487	4.7637	2.41109	3.72381	1.79339	6.3654	1.81241	3.4783	4.95097	2.00563	-1.30366	0.0684625	0.680167	ING1	inhibitor of growth family member 1 [Source:HGNC Symbol;Acc:HGNC:6062]
ENSG00000105993	0	2.41109	0	2.69008	0	0.906203	1.00123	0	2.00246	NA	0.0687449	0.680167	DNAJB6	DnaJ heat shock protein family (Hsp40) member B6 [Source:HGNC Symbol;Acc:HGNC:14888]
ENSG00000128276	0	2.41109	0	2.69008	0	0.906203	1.00123	0	2.00246	NA	0.0687449	0.680167	RFPL3	ret finger protein like 3 [Source:HGNC Symbol;Acc:HGNC:9980]
ENSG00000132694	0	2.41109	0	2.69008	0	0.906203	1.00123	0	2.00246	NA	0.0687449	0.680167	ARHGEF11	Rho guanine nucleotide exchange factor 11 [Source:HGNC Symbol;Acc:HGNC:14580]
ENSG00000170088	44.7787	27.7275	49.3405	19.7273	78.5067	31.7171	41.9663	57.542	26.3906	-1.12459	0.0687531	0.680167	TMEM192	transmembrane protein 192 [Source:HGNC Symbol;Acc:HGNC:26775]
ENSG00000138829	27.6294	30.1386	6.51667	12.5537	16.9744	24.4675	19.7134	17.0402	22.3866	0.393696	0.0687787	0.680167	FBN2	fibrillin 2 [Source:HGNC Symbol;Acc:HGNC:3604]
ENSG00000203855	9.52739	12.0554	2.79286	4.48347	1.0609	5.43722	5.89288	4.46038	7.32538	0.715736	0.0688604	0.680167	HSD3BP4	hydroxy-delta-5-steroid dehydrogenase, 3 beta, pseudogene 4 [Source:HGNC Symbol;Acc:HGNC:5222]
ENSG00000132763	245.807	430.379	264.391	332.674	172.927	286.36	288.756	227.708	349.804	0.619363	0.0689948	0.680167	MMACHC	metabolism of cobalamin associated C [Source:HGNC Symbol;Acc:HGNC:24525]
ENSG00000228061	49.5424	55.4551	27.9286	44.8347	20.1571	37.1543	39.1787	32.5427	45.8147	0.493476	0.0690099	0.680167	AC131571.1	novel transcript, antisense to ELP4
ENSG00000187003	0.952739	2.41109	0	1.79339	1.0609	4.53102	1.79152	0.671213	2.91183	2.11708	0.0692254	0.680167	ACTL7A	actin like 7A [Source:HGNC Symbol;Acc:HGNC:161]
ENSG00000113525	0	1.20554	0	3.58678	0	2.71861	1.25182	0	2.50364	NA	0.0692956	0.680167	IL5	interleukin 5 [Source:HGNC Symbol;Acc:HGNC:6016]
ENSG00000152464	88.6047	157.926	80.9929	112.984	76.3849	108.744	104.273	81.9942	126.551	0.626131	0.0692987	0.680167	RPP38	ribonuclease P/MRP subunit p38 [Source:HGNC Symbol;Acc:HGNC:30329]
ENSG00000251474	3.81096	1.20554	0.930953	0	6.3654	3.62481	2.65628	3.70244	1.61012	-1.20131	0.069412	0.680167	RPL32P3	ribosomal protein L32 pseudogene 3 [Source:HGNC Symbol;Acc:HGNC:27024]
ENSG00000271745	13.3383	2.41109	13.0333	7.17356	18.0353	13.593	11.2641	14.8023	7.7259	-0.93805	0.0694155	0.680167	NA	NA
ENSG00000141279	11.4329	0	6.51667	2.69008	14.8526	4.53102	6.67054	10.9341	2.40703	-2.1835	0.0694204	0.680167	NPEPPS	aminopeptidase puromycin sensitive [Source:HGNC Symbol;Acc:HGNC:7900]
ENSG00000215704	20.0075	7.23327	15.8262	7.17356	18.0353	13.593	13.6448	17.9563	9.33329	-0.944036	0.0697618	0.680167	CELA2B	chymotrypsin like elastase 2B [Source:HGNC Symbol;Acc:HGNC:29995]
ENSG00000121853	8.57465	3.61663	4.65477	1.79339	16.9744	9.06203	7.44598	10.0679	4.82402	-1.06146	0.0699648	0.680167	GHSR	growth hormone secretagogue receptor [Source:HGNC Symbol;Acc:HGNC:4267]
ENSG00000213467	0	2.41109	1.86191	4.48347	0	5.43722	2.36561	0.620635	4.11059	2.72753	0.0700255	0.680167	HMGB1P37	high mobility group box 1 pseudogene 37 [Source:HGNC Symbol;Acc:HGNC:39184]
ENSG00000246422	5.71643	0	3.72381	1.79339	6.3654	0.906203	3.08421	5.26855	0.899864	-2.54963	0.0700504	0.680167	DIAPH1-AS1	DIAPH1 antisense RNA 1 [Source:HGNC Symbol;Acc:HGNC:40177]
ENSG00000163382	1.90548	6.02772	2.79286	4.48347	2.1218	7.24963	4.09683	2.27338	5.92027	1.38083	0.0701382	0.680167	NAXE	NAD(P)HX epimerase [Source:HGNC Symbol;Acc:HGNC:18453]
ENSG00000173418	4.7637	2.41109	11.1714	4.48347	10.609	3.62481	6.17725	8.84805	3.50646	-1.33534	0.0703488	0.680167	NAA20	N(alpha)-acetyltransferase 20, NatB catalytic subunit [Source:HGNC Symbol;Acc:HGNC:15908]
ENSG00000257270	88.6047	102.471	84.7167	99.5331	97.6029	128.681	100.268	90.3081	110.228	0.287569	0.0704181	0.680167	AL928654.2	novel transcript, antisense to MTA1
ENSG00000145916	48.5897	68.716	74.4762	101.327	35.0097	85.1831	68.8836	52.6919	85.0752	0.691158	0.0707549	0.680167	RMND5B	required for meiotic nuclear division 5 homolog B [Source:HGNC Symbol;Acc:HGNC:26181]
ENSG00000174628	5.71643	3.61663	7.44762	3.58678	4.2436	2.71861	4.55495	5.80255	3.30734	-0.811016	0.070968	0.680167	IQCK	IQ motif containing K [Source:HGNC Symbol;Acc:HGNC:28556]
ENSG00000255875	3.81096	6.02772	3.72381	4.48347	2.1218	3.62481	3.96543	3.21886	4.712	0.549792	0.0710184	0.680167	AC008813.1	poly(A) binding protein, nuclear 1 (PABPN1) pseudogene
ENSG00000059915	8.57465	3.61663	13.9643	3.58678	20.1571	5.43722	9.22278	14.232	4.21354	-1.75603	0.071075	0.680167	PSD	pleckstrin and Sec7 domain containing [Source:HGNC Symbol;Acc:HGNC:9507]
ENSG00000204113	2.85822	6.02772	8.37858	17.9339	6.3654	15.4055	9.49488	5.8674	13.1224	1.16123	0.0712815	0.680167	BMP2KL	BMP2 inducible kinase like (pseudogene) [Source:HGNC Symbol;Acc:HGNC:17080]
ENSG00000231889	232.468	191.682	318.386	196.376	231.276	113.275	213.911	260.71	167.111	-0.64164	0.0713189	0.680167	TRAF3IP2-AS1	TRAF3IP2 antisense RNA 1 [Source:HGNC Symbol;Acc:HGNC:40005]
ENSG00000161791	48.5897	80.7715	77.2691	115.674	63.654	76.1211	77.0132	63.1709	90.8554	0.524311	0.0713198	0.680167	FMNL3	formin like 3 [Source:HGNC Symbol;Acc:HGNC:23698]
ENSG00000077235	0	1.20554	0	0.896695	3.1827	5.43722	1.78703	1.0609	2.51315	1.24421	0.0715739	0.680167	GTF3C1	general transcription factor IIIC subunit 1 [Source:HGNC Symbol;Acc:HGNC:4664]
ENSG00000105127	37.1568	13.261	49.3405	16.1405	38.1924	27.1861	30.2129	41.5633	18.8625	-1.13979	0.0717994	0.680167	AKAP8	A-kinase anchoring protein 8 [Source:HGNC Symbol;Acc:HGNC:378]
ENSG00000161281	11.4329	3.61663	6.51667	0.896695	5.3045	2.71861	5.081	7.75135	2.41065	-1.68503	0.07201	0.680167	COX7A1	cytochrome c oxidase subunit 7A1 [Source:HGNC Symbol;Acc:HGNC:2287]
ENSG00000224101	138.147	128.993	166.641	138.988	207.937	181.241	160.324	170.908	149.741	-0.190756	0.0720822	0.680167	ELMO1-AS1	ELMO1 antisense RNA 1 [Source:HGNC Symbol;Acc:HGNC:40765]
ENSG00000206560	69.55	48.2218	86.5786	78.9091	81.6894	57.997	70.491	79.2726	61.7093	-0.361335	0.0721977	0.680167	ANKRD28	ankyrin repeat domain 28 [Source:HGNC Symbol;Acc:HGNC:29024]
ENSG00000204438	1.90548	1.20554	1.86191	0	1.0609	0	1.00564	1.60943	0.401848	-2.00183	0.0721997	0.680167	GPANK1	G-patch domain and ankyrin repeats 1 [Source:HGNC Symbol;Acc:HGNC:13920]
ENSG00000244604	4.7637	1.20554	4.65477	2.69008	7.42631	1.81241	3.7588	5.61492	1.90268	-1.56123	0.0722896	0.680167	AC025518.1	ribosomal protein S26 (RPS26) pseudogene
ENSG00000099958	6.66917	4.82218	10.2405	4.48347	8.48721	3.62481	6.38789	8.46562	4.31016	-0.973876	0.0723345	0.680167	DERL3	derlin 3 [Source:HGNC Symbol;Acc:HGNC:14236]
ENSG00000229638	2.85822	3.61663	3.72381	5.38017	1.0609	1.81241	3.07536	2.54764	3.60307	0.500063	0.0723624	0.680167	RPL4P4	ribosomal protein L4 pseudogene 4 [Source:HGNC Symbol;Acc:HGNC:36179]
ENSG00000226715	83.841	112.116	67.0286	122.847	65.7759	88.8079	90.0694	72.2152	107.924	0.579636	0.0723932	0.680167	LINC01709	long intergenic non-protein coding RNA 1709 [Source:HGNC Symbol;Acc:HGNC:52497]
ENSG00000236782	20.0075	13.261	23.2738	17.0372	21.218	19.0303	18.9713	21.4998	16.4428	-0.386865	0.0725836	0.680167	AL391650.1	novel protein
ENSG00000211445	27.6294	12.0554	15.8262	10.7603	16.9744	5.43722	14.7805	20.1433	9.41767	-1.09686	0.0726563	0.680167	GPX3	glutathione peroxidase 3 [Source:HGNC Symbol;Acc:HGNC:4555]
ENSG00000186020	16.1966	6.02772	26.0667	11.657	20.1571	15.4055	15.9184	20.8068	11.0301	-0.915612	0.0729	0.680167	ZNF529	zinc finger protein 529 [Source:HGNC Symbol;Acc:HGNC:29328]
ENSG00000257277	4.7637	6.02772	4.65477	6.27686	9.54811	12.6868	7.32633	6.32219	8.33048	0.397975	0.0730093	0.680167	AC092652.1	novel transcript, antisense to ARHGAP15
ENSG00000255173	2.85822	3.61663	0	0.896695	0	1.81241	1.53066	0.952739	2.10858	1.14612	0.0730094	0.680167	AP003068.3	novel transcript
ENSG00000103489	3.81096	1.20554	3.72381	2.69008	3.1827	1.81241	2.73758	3.57249	1.90268	-0.908898	0.0730167	0.680167	XYLT1	xylosyltransferase 1 [Source:HGNC Symbol;Acc:HGNC:15516]
ENSG00000230459	8.57465	12.0554	7.44762	17.9339	6.3654	13.593	10.995	7.46256	14.5275	0.96104	0.0731757	0.680167	AC060773.1	high mobility group nucleosomal binding domain 2 (HMGN2) pseudogene
ENSG00000196228	3.81096	1.20554	2.79286	0.896695	8.48721	3.62481	3.46968	5.03034	1.90902	-1.39783	0.0731897	0.680167	SULT1C3	sulfotransferase family 1C member 3 [Source:HGNC Symbol;Acc:HGNC:33543]
ENSG00000267112	18.102	33.7552	35.3762	40.3513	6.3654	19.9365	25.6478	19.9479	31.3477	0.652122	0.0732685	0.680167	AC098848.1	novel transcript, antisense to RAB27B
ENSG00000157578	14.2911	22.9053	10.2405	17.9339	7.42631	25.3737	16.3618	10.6526	22.071	1.05094	0.0733438	0.680167	LCA5L	lebercilin LCA5 like [Source:HGNC Symbol;Acc:HGNC:1255]
ENSG00000236266	14.2911	86.7992	10.2405	127.331	10.609	51.6536	50.154	11.7135	88.5945	2.91904	0.0733915	0.680167	Z98884.1	novel transcript
ENSG00000257636	16.1966	19.2887	4.65477	7.17356	13.7917	19.9365	13.507	11.5477	15.4662	0.42152	0.0734959	0.680167	G2E3-AS1	G2E3 antisense RNA 1 [Source:HGNC Symbol;Acc:HGNC:53463]
ENSG00000171757	1.90548	6.02772	3.72381	14.3471	10.609	16.3117	8.8208	5.41277	12.2288	1.17585	0.0735018	0.680167	LRRC34	leucine rich repeat containing 34 [Source:HGNC Symbol;Acc:HGNC:28408]
ENSG00000268069	93.3684	67.5105	103.336	76.2191	91.2375	82.4645	85.6893	95.9806	75.398	-0.348216	0.0736081	0.680167	AC004466.1	novel transcript, antisense to HDAC7
ENSG00000109686	1369.09	2599.15	1895.42	3021.86	1215.79	1608.51	1951.64	1493.43	2409.84	0.690306	0.0736826	0.680167	SH3D19	SH3 domain containing 19 [Source:HGNC Symbol;Acc:HGNC:30418]
ENSG00000235674	120.998	109.705	101.474	81.5992	109.273	77.0273	100.013	110.582	89.4437	-0.306059	0.0737318	0.680167	LDHAP2	lactate dehydrogenase A pseudogene 2 [Source:HGNC Symbol;Acc:HGNC:6537]
ENSG00000117298	1.90548	0	4.65477	0.896695	4.2436	2.71861	2.40319	3.60128	1.2051	-1.57936	0.0738032	0.680167	ECE1	endothelin converting enzyme 1 [Source:HGNC Symbol;Acc:HGNC:3146]
ENSG00000115556	38.1096	42.1941	26.9976	39.4546	21.218	29.9047	32.9798	28.7751	37.1844	0.36988	0.0738158	0.680167	PLCD4	phospholipase C delta 4 [Source:HGNC Symbol;Acc:HGNC:9062]
ENSG00000167094	0	1.20554	0	1.79339	2.1218	2.71861	1.30656	0.707267	1.90585	1.43011	0.0739662	0.680167	TTC16	tetratricopeptide repeat domain 16 [Source:HGNC Symbol;Acc:HGNC:26536]
ENSG00000173599	42.8733	53.044	37.2381	63.6653	32.8879	47.1226	46.1385	37.6664	54.6106	0.535902	0.0739941	0.680167	PC	pyruvate carboxylase [Source:HGNC Symbol;Acc:HGNC:8636]
ENSG00000204446	0	2.41109	0	0.896695	5.3045	8.15583	2.79469	1.76817	3.8212	1.11177	0.0740265	0.680167	C9orf170	chromosome 9 open reading frame 170 [Source:HGNC Symbol;Acc:HGNC:33817]
ENSG00000184613	0.952739	0	0.930953	0	2.1218	1.81241	0.96965	1.33516	0.604135	-1.14407	0.0741052	0.680167	NELL2	neural EGFL like 2 [Source:HGNC Symbol;Acc:HGNC:7751]
ENSG00000107854	14.2911	32.5497	10.2405	25.1075	4.2436	9.96823	16.0668	9.59172	22.5418	1.23274	0.0743454	0.680167	TNKS2	tankyrase 2 [Source:HGNC Symbol;Acc:HGNC:15677]
ENSG00000258824	435.402	648.583	455.236	724.529	395.716	480.288	523.292	428.785	617.8	0.526887	0.0744523	0.680167	AL122035.1	novel transcript
ENSG00000123353	2.85822	6.02772	2.79286	4.48347	3.1827	8.15583	4.58347	2.94459	6.22234	1.07939	0.0745883	0.680167	ORMDL2	ORMDL sphingolipid biosynthesis regulator 2 [Source:HGNC Symbol;Acc:HGNC:16037]
ENSG00000158796	16.1966	13.261	21.4119	14.3471	26.5225	17.2179	18.1595	21.377	14.942	-0.516687	0.0747316	0.680167	DEDD	death effector domain containing [Source:HGNC Symbol;Acc:HGNC:2755]
ENSG00000272509	9.52739	6.02772	6.51667	5.38017	5.3045	1.81241	5.76148	7.11619	4.40677	-0.691384	0.0749116	0.680167	AC087752.4	novel transcript, antisense to CCNE2
ENSG00000100811	10.4801	13.261	6.51667	8.07025	6.3654	10.8744	9.26131	7.7874	10.7352	0.463139	0.0751574	0.680167	YY1	YY1 transcription factor [Source:HGNC Symbol;Acc:HGNC:12856]
ENSG00000147050	5.71643	1.20554	3.72381	1.79339	2.1218	0	2.42683	3.85402	0.999645	-1.94688	0.0751633	0.680167	KDM6A	lysine demethylase 6A [Source:HGNC Symbol;Acc:HGNC:12637]
ENSG00000102309	6046.08	8214.58	4275.87	6762.87	3517.95	4288.15	5517.58	4613.3	6421.87	0.477194	0.0754937	0.680167	PIN4	peptidylprolyl cis/trans isomerase, NIMA-interacting 4 [Source:HGNC Symbol;Acc:HGNC:8992]
ENSG00000277443	23.8185	19.2887	11.1714	6.27686	28.6443	18.1241	17.8873	21.2114	14.5632	-0.542512	0.0755431	0.680167	MARCKS	myristoylated alanine rich protein kinase C substrate [Source:HGNC Symbol;Acc:HGNC:6759]
ENSG00000140548	19.0548	3.61663	21.4119	11.657	23.3398	18.1241	16.2007	21.2688	11.1326	-0.933954	0.0755861	0.680167	ZNF710	zinc finger protein 710 [Source:HGNC Symbol;Acc:HGNC:25352]
ENSG00000240291	32.3931	56.6606	48.4096	74.4257	56.2277	64.3404	55.4095	45.6768	65.1422	0.512131	0.0760607	0.680167	AL450384.2	novel transcript, antisense to CACNB2
ENSG00000120885	5.71643	8.43881	8.37858	17.0372	5.3045	13.593	9.74476	6.46651	13.023	1.01001	0.0760982	0.680167	CLU	clusterin [Source:HGNC Symbol;Acc:HGNC:2095]
ENSG00000254913	36.2041	24.1109	48.4096	8.96695	83.8112	51.6536	42.1927	56.1416	28.2438	-0.991136	0.0762243	0.680167	AC239802.1	novel transcript
ENSG00000278918	147.675	96.4436	121.024	56.4918	236.581	107.838	127.675	168.426	86.9245	-0.954284	0.0764555	0.680167	AC080112.4	novel transcript
ENSG00000103550	2.85822	6.02772	2.79286	4.48347	4.2436	5.43722	4.30718	3.29823	5.31614	0.688688	0.0766635	0.680167	KNOP1	lysine rich nucleolar protein 1 [Source:HGNC Symbol;Acc:HGNC:34404]
ENSG00000268983	122.903	106.088	119.162	102.223	111.395	106.026	111.299	117.82	104.779	-0.169235	0.0767105	0.680167	AC005253.2	novel transcript, antisense to KXD1
ENSG00000232892	208.65	705.244	768.967	1145.08	112.455	265.518	534.319	363.358	705.28	0.956807	0.0767764	0.680167	AL499616.1	novel transcript
ENSG00000136770	0.952739	0	0.930953	0	2.1218	0	0.667582	1.33516	0	NA	0.0769204	0.680167	DNAJC1	DnaJ heat shock protein family (Hsp40) member C1 [Source:HGNC Symbol;Acc:HGNC:20090]
ENSG00000140396	0.952739	0	0.930953	0	2.1218	0	0.667582	1.33516	0	NA	0.0769204	0.680167	NCOA2	nuclear receptor coactivator 2 [Source:HGNC Symbol;Acc:HGNC:7669]
ENSG00000147642	0.952739	0	0.930953	0	2.1218	0	0.667582	1.33516	0	NA	0.0769204	0.680167	SYBU	syntabulin [Source:HGNC Symbol;Acc:HGNC:26011]
ENSG00000203852	1.90548	0	1.86191	0	4.2436	0	1.33516	2.67033	0	NA	0.0769204	0.680167	H3C15	H3 clustered histone 15 [Source:HGNC Symbol;Acc:HGNC:20505]
ENSG00000259053	0.952739	0	0.930953	0	2.1218	0	0.667582	1.33516	0	NA	0.0769204	0.680167	AL137230.3	novel transcript
ENSG00000281106	0.952739	0	0.930953	0	2.1218	0	0.667582	1.33516	0	NA	0.0769204	0.680167	TMEM272	transmembrane protein 272 [Source:HGNC Symbol;Acc:HGNC:26737]
ENSG00000245904	17.1493	4.82218	10.2405	3.58678	12.7308	8.15583	9.44756	13.3735	5.5216	-1.27622	0.0771157	0.680167	AC025164.2	novel transcript, antisense to BTG1
ENSG00000172638	26.6767	14.4665	28.8595	19.7273	38.1924	34.4357	27.0597	31.2429	22.8765	-0.449661	0.0772111	0.680167	EFEMP2	EGF containing fibulin extracellular matrix protein 2 [Source:HGNC Symbol;Acc:HGNC:3219]
ENSG00000234327	0.952739	1.20554	1.86191	2.69008	1.0609	1.81241	1.59726	1.29185	1.90268	0.558595	0.0772327	0.680167	AC012146.1	novel transcript, antisense to ZNF232
ENSG00000173064	1.90548	0	5.58572	3.58678	4.2436	3.62481	3.15773	3.9116	2.40386	-0.702404	0.0772521	0.680167	HECTD4	HECT domain E3 ubiquitin protein ligase 4 [Source:HGNC Symbol;Acc:HGNC:26611]
ENSG00000186283	58.1171	19.2887	57.7191	27.7975	96.542	19.9365	46.5668	70.7927	22.3409	-1.66391	0.0772532	0.680167	TOR3A	torsin family 3 member A [Source:HGNC Symbol;Acc:HGNC:11997]
ENSG00000250990	17.1493	12.0554	10.2405	6.27686	10.609	9.06203	10.8989	12.6663	9.13145	-0.472076	0.0775331	0.680167	AC098851.1	novel transcript
ENSG00000058600	8.57465	13.261	1.86191	3.58678	4.2436	9.96823	6.91603	4.89339	8.93867	0.869226	0.0776623	0.680167	POLR3E	RNA polymerase III subunit E [Source:HGNC Symbol;Acc:HGNC:30347]
ENSG00000225185	0	2.41109	0	4.48347	1.0609	2.71861	1.77901	0.353634	3.20439	3.17972	0.077724	0.680167	PPIAP8	peptidylprolyl isomerase A pseudogene 8 [Source:HGNC Symbol;Acc:HGNC:9271]
ENSG00000267139	86.6993	74.7438	84.7167	62.7686	92.2984	84.2769	80.9173	87.9048	73.9298	-0.249786	0.0778437	0.680167	AC005262.2	novel transcript, antisense to GNA11
ENSG00000168591	4.7637	2.41109	5.58572	1.79339	8.48721	1.81241	4.14225	6.27887	2.00563	-1.64645	0.0781901	0.680167	TMUB2	transmembrane and ubiquitin like domain containing 2 [Source:HGNC Symbol;Acc:HGNC:28459]
ENSG00000171503	3.81096	2.41109	5.58572	2.69008	5.3045	0.906203	3.45143	4.90039	2.00246	-1.29112	0.0788113	0.680167	ETFDH	electron transfer flavoprotein dehydrogenase [Source:HGNC Symbol;Acc:HGNC:3483]
ENSG00000169313	10.4801	4.82218	29.7905	10.7603	22.2789	5.43722	13.9282	20.8498	7.00658	-1.57325	0.079025	0.680167	P2RY12	purinergic receptor P2Y12 [Source:HGNC Symbol;Acc:HGNC:18124]
ENSG00000227274	1.90548	0	11.1714	6.27686	4.2436	1.81241	4.23496	5.77351	2.69642	-1.0984	0.0791525	0.680167	MYOCD-AS1	MYOCD antisense RNA 1 [Source:HGNC Symbol;Acc:HGNC:40750]
ENSG00000182054	39.0623	34.9608	20.481	8.96695	39.2533	25.3737	28.0163	32.9322	23.1005	-0.511576	0.0792279	0.680167	IDH2	isocitrate dehydrogenase (NADP(+)) 2 [Source:HGNC Symbol;Acc:HGNC:5383]
ENSG00000258527	4.7637	6.02772	5.58572	8.07025	4.2436	8.15583	6.14114	4.86434	7.41793	0.608774	0.0792732	0.680167	ASB9P1	ankyrin repeat and SOCS box containing 9 pseudogene 1 [Source:HGNC Symbol;Acc:HGNC:20972]
ENSG00000104218	45.7315	38.5774	53.9953	44.8347	45.6187	27.1861	42.6573	48.4485	36.8661	-0.394158	0.079386	0.680167	CSPP1	centrosome and spindle pole associated protein 1 [Source:HGNC Symbol;Acc:HGNC:26193]
ENSG00000206127	5.71643	8.43881	6.51667	15.2438	3.1827	9.06203	8.02674	5.1386	10.9149	1.08685	0.0795313	0.680167	GOLGA8O	golgin A8 family member O [Source:HGNC Symbol;Acc:HGNC:44406]
ENSG00000225766	4.7637	1.20554	5.58572	4.48347	4.2436	1.81241	3.68241	4.86434	2.50048	-0.960042	0.079544	0.680167	DHRS4L1	dehydrogenase/reductase 4 like 1 [Source:HGNC Symbol;Acc:HGNC:19732]
ENSG00000224713	590.698	552.139	452.443	371.232	705.499	582.689	542.45	582.88	502.02	-0.215455	0.0797956	0.680167	AC025165.1	novel transcript, antisense to ARHGEF25
ENSG00000128604	1.90548	10.8499	1.86191	4.48347	4.2436	11.7806	5.85417	2.67033	9.03801	1.75899	0.0798894	0.680167	IRF5	interferon regulatory factor 5 [Source:HGNC Symbol;Acc:HGNC:6120]
ENSG00000166428	0.952739	1.20554	0.930953	1.79339	1.0609	1.81241	1.29266	0.981531	1.60378	0.708371	0.0800296	0.680167	PLD4	phospholipase D family member 4 [Source:HGNC Symbol;Acc:HGNC:23792]
ENSG00000155744	2.85822	7.23327	6.51667	8.07025	8.48721	10.8744	7.34001	5.95403	8.72599	0.551451	0.0803234	0.680167	FAM126B	family with sequence similarity 126 member B [Source:HGNC Symbol;Acc:HGNC:28593]
ENSG00000141526	1247.14	764.315	1051.98	710.182	2024.2	1097.41	1149.2	1441.1	857.303	-0.749297	0.080324	0.680167	SLC16A3	solute carrier family 16 member 3 [Source:HGNC Symbol;Acc:HGNC:10924]
ENSG00000257467	32.3931	26.522	40.9619	22.4174	55.1668	35.3419	35.4672	42.8406	28.0938	-0.60873	0.0803528	0.680167	PPFIA2-AS1	PPFIA2 antisense RNA 1 [Source:HGNC Symbol;Acc:HGNC:53397]
ENSG00000263585	138.147	121.76	75.4072	38.5579	163.379	147.711	114.16	125.644	102.676	-0.291242	0.0805147	0.680167	AC145207.4	novel transcript, antisense PYCR1
ENSG00000260879	78.1246	86.7992	35.3762	51.1116	61.5322	67.059	63.3338	58.3444	68.3233	0.227784	0.0805815	0.680167	AL359258.2	novel transcript, antisense to SLC25A24
ENSG00000260689	11.4329	9.64436	12.1024	7.17356	11.6699	9.06203	10.1809	11.7351	8.62665	-0.443953	0.0806209	0.680167	HNRNPA3P11	heterogeneous nuclear ribonucleoprotein A3 pseudogene 11 [Source:HGNC Symbol;Acc:HGNC:48757]
ENSG00000176349	3.81096	2.41109	6.51667	4.48347	4.2436	3.62481	4.18177	4.85708	3.50646	-0.470074	0.0807667	0.680167	AC104129.1	novel transcript, antisense to MAD1L1
ENSG00000213742	227.705	251.959	175.95	217	198.388	212.052	213.842	200.681	227.004	0.17781	0.0807902	0.680167	ZNF337-AS1	ZNF337 antisense RNA 1 [Source:HGNC Symbol;Acc:HGNC:40759]
ENSG00000116251	14.2911	16.8776	1.86191	10.7603	8.48721	16.3117	11.4316	8.2134	14.6499	0.834837	0.0807986	0.680167	RPL22	ribosomal protein L22 [Source:HGNC Symbol;Acc:HGNC:10315]
ENSG00000174827	30.4876	34.9608	43.7548	59.1819	25.4616	38.0605	38.6512	33.2347	44.0677	0.407033	0.0808625	0.680167	PDZK1	PDZ domain containing 1 [Source:HGNC Symbol;Acc:HGNC:8821]
ENSG00000174326	2.85822	0	1.86191	0.896695	4.2436	0.906203	1.79444	2.98791	0.600966	-2.31378	0.0810219	0.680167	SLC16A11	solute carrier family 16 member 11 [Source:HGNC Symbol;Acc:HGNC:23093]
ENSG00000279086	49.5424	37.3719	26.9976	22.4174	45.6187	29.9047	35.3088	40.7196	29.898	-0.445675	0.0810552	0.680167	AC073130.3	TEC
ENSG00000157470	3.81096	2.41109	5.58572	0.896695	4.2436	0.906203	2.97571	4.54676	1.40466	-1.69462	0.0812007	0.680167	FAM81A	family with sequence similarity 81 member A [Source:HGNC Symbol;Acc:HGNC:28379]
ENSG00000105676	0	3.61663	3.72381	7.17356	0	8.15583	3.77831	1.24127	6.31534	2.34704	0.0812223	0.680167	ARMC6	armadillo repeat containing 6 [Source:HGNC Symbol;Acc:HGNC:25049]
ENSG00000151725	14.2911	27.7275	3.72381	14.3471	10.609	14.4993	14.1996	9.5413	18.858	0.982916	0.0812978	0.680167	CENPU	centromere protein U [Source:HGNC Symbol;Acc:HGNC:21348]
ENSG00000158104	14.2911	8.43881	6.51667	3.58678	13.7917	4.53102	8.52601	11.5332	5.51887	-1.06334	0.0813826	0.680167	HPD	4-hydroxyphenylpyruvate dioxygenase [Source:HGNC Symbol;Acc:HGNC:5147]
ENSG00000186743	1.90548	2.41109	0.930953	2.69008	2.1218	3.62481	2.2807	1.65274	2.90866	0.815492	0.0815187	0.680167	TPI1P3	triosephosphate isomerase 1 pseudogene 3 [Source:HGNC Symbol;Acc:HGNC:38070]
ENSG00000066044	1151.86	1281.49	1296.82	1558.46	1077.88	1177.16	1257.28	1175.52	1339.04	0.187898	0.0816707	0.680167	ELAVL1	ELAV like RNA binding protein 1 [Source:HGNC Symbol;Acc:HGNC:3312]
ENSG00000023191	1.90548	10.8499	6.51667	11.657	4.2436	7.24963	7.07039	4.22192	9.91885	1.23227	0.0817054	0.680167	RNH1	ribonuclease/angiogenin inhibitor 1 [Source:HGNC Symbol;Acc:HGNC:10074]
ENSG00000212747	3.81096	4.82218	1.86191	5.38017	11.6699	14.4993	7.00739	5.78092	8.23387	0.51027	0.0817076	0.680167	RTL8B	retrotransposon Gag like 8B [Source:HGNC Symbol;Acc:HGNC:33156]
ENSG00000230155	77.1719	94.0325	58.65	77.1158	67.8977	108.744	80.602	67.9065	93.2975	0.458289	0.0817293	0.680167	CEP250-AS1	CEP250 antisense RNA 1 [Source:HGNC Symbol;Acc:HGNC:40143]
ENSG00000159216	7.62191	1.20554	9.30953	0.896695	4.2436	1.81241	4.18162	7.05835	1.30488	-2.43541	0.082061	0.680167	RUNX1	RUNX family transcription factor 1 [Source:HGNC Symbol;Acc:HGNC:10471]
ENSG00000114388	5.71643	4.82218	12.1024	8.96695	19.0962	16.3117	11.1693	12.305	10.0336	-0.294408	0.0824442	0.680167	NPRL2	NPR2 like, GATOR1 complex subunit [Source:HGNC Symbol;Acc:HGNC:24969]
ENSG00000273734	125.762	133.815	107.991	136.298	123.064	145.899	128.805	118.939	138.671	0.221442	0.0825121	0.680167	AC005258.1	novel protein, readthrough between OAZ1 and SPPL2B
ENSG00000162849	10.4801	6.02772	13.0333	9.86364	22.2789	13.593	12.5461	15.2641	9.82814	-0.635155	0.082526	0.680167	KIF26B	kinesin family member 26B [Source:HGNC Symbol;Acc:HGNC:25484]
ENSG00000253915	0	7.23327	0	2.69008	0	3.62481	2.25803	0	4.51605	NA	0.0825875	0.680167	MAPRE1P1	MAPRE1 pseudogene 1 [Source:HGNC Symbol;Acc:HGNC:29624]
ENSG00000166311	0	1.20554	0	0.896695	2.1218	4.53102	1.45918	0.707267	2.21109	1.64443	0.0826349	0.680167	SMPD1	sphingomyelin phosphodiesterase 1 [Source:HGNC Symbol;Acc:HGNC:11120]
ENSG00000173715	4.7637	7.23327	1.86191	6.27686	4.2436	11.7806	6.02666	3.62307	8.43026	1.21836	0.0827354	0.680167	C11orf80	chromosome 11 open reading frame 80 [Source:HGNC Symbol;Acc:HGNC:26197]
ENSG00000229591	26.6767	28.9331	26.9976	34.9711	15.9135	22.6551	26.0245	23.1959	28.8531	0.314853	0.0827583	0.680167	AC006017.1	novel transcript
ENSG00000152457	39.0623	61.4828	51.2024	59.1819	43.4969	55.2784	51.6174	44.5872	58.6477	0.395444	0.0828956	0.680167	DCLRE1C	DNA cross-link repair 1C [Source:HGNC Symbol;Acc:HGNC:17642]
ENSG00000243147	12.3856	4.82218	9.30953	7.17356	6.3654	0	6.67605	9.35351	3.99858	-1.22602	0.082922	0.680167	MRPL33	mitochondrial ribosomal protein L33 [Source:HGNC Symbol;Acc:HGNC:14487]
ENSG00000223563	470.653	179.626	1103.18	129.124	1142.59	142.274	527.908	905.474	150.341	-2.59043	0.0829428	0.680167	AP001599.1	novel transcript
ENSG00000130021	2.85822	1.20554	11.1714	6.27686	6.3654	3.62481	5.25038	6.79835	3.70241	-0.876722	0.0830468	0.680167	PUDP	pseudouridine 5'-phosphatase [Source:HGNC Symbol;Acc:HGNC:16818]
ENSG00000130520	0.952739	1.20554	0	0.896695	1.0609	1.81241	0.988048	0.671213	1.30488	0.959076	0.0830615	0.680167	LSM4	LSM4 homolog, U6 small nuclear RNA and mRNA degradation associated [Source:NCBI gene;Acc:25804]
ENSG00000143570	0.952739	1.20554	0	0.896695	1.0609	1.81241	0.988048	0.671213	1.30488	0.959076	0.0830615	0.680167	SLC39A1	solute carrier family 39 member 1 [Source:HGNC Symbol;Acc:HGNC:12876]
ENSG00000160214	1.90548	2.41109	0	1.79339	2.1218	3.62481	1.9761	1.34243	2.60976	0.959076	0.0830615	0.680167	RRP1	ribosomal RNA processing 1 [Source:HGNC Symbol;Acc:HGNC:18785]
ENSG00000249209	766.002	928.269	908.61	1100.24	854.025	908.016	910.861	842.879	978.843	0.215752	0.083118	0.680167	AP000311.1	novel protein similar to ATP synthase delta (OSCP) subunit domain
ENSG00000227417	17.1493	14.4665	14.8952	9.86364	20.1571	11.7806	14.7187	17.4006	12.0369	-0.531665	0.0831967	0.680167	AC114402.2	SNF7 domain containing 2 (SNF7DC20) pseudogene
ENSG00000265490	51.4479	27.7275	83.7858	77.1158	85.933	66.1528	65.3605	73.7222	56.9987	-0.37117	0.0832816	0.680167	AP001178.2	novel transcript, antisense to ENOSF1
ENSG00000177112	463.031	385.774	614.429	380.199	728.839	454.008	504.38	602.1	406.66	-0.566179	0.083311	0.680167	MRVI1-AS1	MRVI1 antisense RNA 1 [Source:HGNC Symbol;Acc:HGNC:43434]
ENSG00000253270	9.52739	4.82218	25.1357	9.86364	26.5225	9.96823	14.3066	20.3952	8.21802	-1.31137	0.0833412	0.680167	AC090541.1	novel transcript
ENSG00000222521	5.71643	4.82218	5.58572	4.48347	2.1218	1.81241	4.09034	4.47465	3.70602	-0.271905	0.0835673	0.680167	NA	NA
ENSG00000174444	109.565	98.8547	106.129	83.3926	110.334	101.495	101.628	108.676	94.5807	-0.200413	0.0836287	0.680167	RPL4	ribosomal protein L4 [Source:HGNC Symbol;Acc:HGNC:10353]
ENSG00000232578	2.85822	1.20554	7.44762	3.58678	7.42631	1.81241	4.05615	5.91072	2.20158	-1.4248	0.0836586	0.680167	AC093311.1	FAST kinase domains 1 (FASTKD1) pseudogene
ENSG00000128829	8.57465	4.82218	10.2405	8.96695	6.3654	1.81241	6.79701	8.39351	5.20051	-0.690621	0.0837501	0.680167	EIF2AK4	eukaryotic translation initiation factor 2 alpha kinase 4 [Source:HGNC Symbol;Acc:HGNC:19687]
ENSG00000272160	44.7787	74.7438	56.7881	77.1158	57.2886	66.1528	62.8113	52.9518	72.6708	0.456695	0.0838101	0.680167	RNU4-5P	RNA, U4 small nuclear 5, pseudogene [Source:HGNC Symbol;Acc:HGNC:10198]
ENSG00000232928	9.52739	14.4665	15.8262	21.5207	20.1571	21.7489	17.2078	15.1702	19.2454	0.343267	0.0838432	0.680167	DDX3P1	DEAD-box helicase 3 pseudogene 1 [Source:HGNC Symbol;Acc:HGNC:42171]
ENSG00000139687	225.799	353.225	311.869	408.893	188.84	224.738	285.561	242.17	328.952	0.441859	0.0842068	0.680167	RB1	RB transcriptional corepressor 1 [Source:HGNC Symbol;Acc:HGNC:9884]
ENSG00000268812	72.4082	13.261	194.569	11.657	131.552	25.3737	74.8035	132.843	16.7639	-2.98629	0.0844954	0.680167	AC004264.1	novel transcript, antisense to LIF
ENSG00000183378	0.952739	1.20554	1.86191	2.69008	0	0.906203	1.26941	0.938215	1.60061	0.770632	0.0846423	0.680167	OVCH2	ovochymase 2 (gene/pseudogene) [Source:HGNC Symbol;Acc:HGNC:29970]
ENSG00000099899	0	1.20554	0	2.69008	3.1827	7.24963	2.38799	1.0609	3.71508	1.80811	0.0847597	0.680167	TRMT2A	tRNA methyltransferase 2 homolog A [Source:HGNC Symbol;Acc:HGNC:24974]
ENSG00000225934	14.2911	6.02772	13.0333	5.38017	9.54811	7.24963	9.25501	12.2908	6.21917	-0.98279	0.0851364	0.680167	AL592310.1	novel pseudogene
ENSG00000215796	0.952739	2.41109	1.86191	7.17356	0	4.53102	2.82172	0.938215	4.70522	2.32627	0.085205	0.680167	AL512637.1	primase polypeptide 1 49kDa (PRIM1) pseudogene
ENSG00000151694	10.4801	14.4665	16.7572	21.5207	15.9135	17.2179	16.0593	14.3836	17.735	0.302177	0.0854143	0.680167	ADAM17	ADAM metallopeptidase domain 17 [Source:HGNC Symbol;Acc:HGNC:195]
ENSG00000171496	4.7637	1.20554	6.51667	2.69008	1.0609	0	2.70615	4.11376	1.29854	-1.66356	0.0854799	0.680167	OR1L8	olfactory receptor family 1 subfamily L member 8 [Source:HGNC Symbol;Acc:HGNC:15110]
ENSG00000272234	7.62191	59.0717	73.5453	128.227	13.7917	28.9985	51.8761	31.653	72.0992	1.18764	0.085515	0.680167	AC008945.1	novel transcript, antisense to SEPP1
ENSG00000133302	193.406	145.871	273.7	237.624	197.328	99.6823	191.269	221.478	161.059	-0.459573	0.0855308	0.680167	SLF1	SMC5-SMC6 complex localization factor 1 [Source:HGNC Symbol;Acc:HGNC:25408]
ENSG00000267277	0.952739	2.41109	0	2.69008	0	0.906203	1.16002	0.31758	2.00246	2.65658	0.0855528	0.680167	AC024575.2	novel transcript, antisense to SWSAP1
ENSG00000146648	0.952739	1.20554	0.930953	1.79339	0	0.906203	0.964805	0.627897	1.30171	1.05181	0.0855655	0.680167	EGFR	epidermal growth factor receptor [Source:HGNC Symbol;Acc:HGNC:3236]
ENSG00000155111	0.952739	1.20554	0.930953	1.79339	0	0.906203	0.964805	0.627897	1.30171	1.05181	0.0855655	0.680167	CDK19	cyclin dependent kinase 19 [Source:HGNC Symbol;Acc:HGNC:19338]
ENSG00000086548	6.66917	0	1.86191	0	6.3654	0	2.48275	4.96549	0	NA	0.0855869	0.680167	CEACAM6	CEA cell adhesion molecule 6 [Source:HGNC Symbol;Acc:HGNC:1818]
ENSG00000226455	24.7712	14.4665	46.5477	13.4504	37.1315	17.2179	25.5975	36.1501	15.0449	-1.26472	0.0855945	0.680167	AL121787.1	novel transcript
ENSG00000134072	35.2513	49.4273	51.2024	73.529	37.1315	78.8397	54.2302	41.1951	67.2653	0.70739	0.0856777	0.680167	CAMK1	calcium/calmodulin dependent protein kinase I [Source:HGNC Symbol;Acc:HGNC:1459]
ENSG00000170989	0.952739	0	3.72381	0.896695	4.2436	2.71861	2.08924	2.97338	1.2051	-1.30295	0.0858831	0.680167	S1PR1	sphingosine-1-phosphate receptor 1 [Source:HGNC Symbol;Acc:HGNC:3165]
ENSG00000122257	0	4.82218	1.86191	5.38017	3.1827	4.53102	3.29633	1.68154	4.91112	1.54627	0.0859201	0.680167	RBBP6	RB binding protein 6, ubiquitin ligase [Source:HGNC Symbol;Acc:HGNC:9889]
ENSG00000267922	2.85822	6.02772	0.930953	1.79339	0	2.71861	2.38815	1.26306	3.51324	1.47588	0.0859353	0.680167	AC007785.1	novel transcript
ENSG00000185049	0.952739	0	1.86191	0.896695	3.1827	0.906203	1.30004	1.99912	0.600966	-1.73401	0.0861176	0.680167	NELFA	negative elongation factor complex member A [Source:HGNC Symbol;Acc:HGNC:12768]
ENSG00000135469	1.90548	2.41109	0.930953	2.69008	0	1.81241	1.625	0.945477	2.30453	1.28536	0.086149	0.680167	COQ10A	coenzyme Q10A [Source:HGNC Symbol;Acc:HGNC:26515]
ENSG00000231964	23.8185	2.41109	21.4119	11.657	46.6796	13.593	19.9285	30.6367	9.22039	-1.73236	0.0862958	0.680167	AL731567.1	novel transcript
ENSG00000138835	1.90548	0	4.65477	3.58678	4.2436	0.906203	2.54947	3.60128	1.49766	-1.2658	0.0865233	0.680167	RGS3	regulator of G protein signaling 3 [Source:HGNC Symbol;Acc:HGNC:9999]
ENSG00000124089	1.90548	0	6.51667	0	4.2436	0	2.11096	4.22192	0	NA	0.0866842	0.680167	MC3R	melanocortin 3 receptor [Source:HGNC Symbol;Acc:HGNC:6931]
ENSG00000223786	1.90548	0	6.51667	0	4.2436	0	2.11096	4.22192	0	NA	0.0866842	0.680167	AL357507.1	novel transcript
ENSG00000111339	1.90548	2.41109	0	1.79339	0	1.81241	1.32039	0.635159	2.00563	1.65886	0.0868075	0.680167	ART4	ADP-ribosyltransferase 4 (Dombrock blood group) [Source:HGNC Symbol;Acc:HGNC:726]
ENSG00000116117	0.952739	1.20554	0	0.896695	0	0.906203	0.660197	0.31758	1.00281	1.65886	0.0868075	0.680167	PARD3B	par-3 family cell polarity regulator beta [Source:HGNC Symbol;Acc:HGNC:14446]
ENSG00000145721	0.952739	1.20554	0	0.896695	0	0.906203	0.660197	0.31758	1.00281	1.65886	0.0868075	0.680167	LIX1	limb and CNS expressed 1 [Source:HGNC Symbol;Acc:HGNC:18581]
ENSG00000173950	0.952739	1.20554	0	0.896695	0	0.906203	0.660197	0.31758	1.00281	1.65886	0.0868075	0.680167	XXYLT1	xyloside xylosyltransferase 1 [Source:HGNC Symbol;Acc:HGNC:26639]
ENSG00000187164	0.952739	1.20554	0	0.896695	0	0.906203	0.660197	0.31758	1.00281	1.65886	0.0868075	0.680167	SHTN1	shootin 1 [Source:HGNC Symbol;Acc:HGNC:29319]
ENSG00000204290	0.952739	1.20554	0	0.896695	0	0.906203	0.660197	0.31758	1.00281	1.65886	0.0868075	0.680167	BTNL2	butyrophilin like 2 [Source:HGNC Symbol;Acc:HGNC:1142]
ENSG00000259848	0.952739	1.20554	0	0.896695	0	0.906203	0.660197	0.31758	1.00281	1.65886	0.0868075	0.680167	AC097374.1	pseudogene similar to part of asparagine synthetase (ASNS)
ENSG00000143418	237.232	191.682	199.224	176.649	217.485	201.177	203.908	217.98	189.836	-0.199445	0.0869426	0.680167	CERS2	ceramide synthase 2 [Source:HGNC Symbol;Acc:HGNC:14076]
ENSG00000232342	53.3534	132.61	125.679	180.236	76.3849	98.7761	111.173	85.139	137.207	0.688465	0.0871036	0.680167	AC022540.1	novel transcript
ENSG00000254902	51.4479	73.5382	51.2024	83.3926	30.7661	39.8729	55.0367	44.4722	65.6013	0.560821	0.0871131	0.680167	ANO1-AS1	ANO1 antisense RNA 1 [Source:HGNC Symbol;Acc:HGNC:40016]
ENSG00000254846	52.4006	61.4828	74.4762	102.223	71.0804	105.12	77.7971	65.9857	89.6085	0.441481	0.0876105	0.680167	AL355075.1	novel transcript
ENSG00000267908	3.81096	1.20554	4.65477	1.79339	13.7917	7.24963	5.41767	7.41914	3.41619	-1.11887	0.0878349	0.680167	ZSCAN5DP	zinc finger and SCAN domain containing 5D pseudogene [Source:HGNC Symbol;Acc:HGNC:37706]
ENSG00000179044	0.952739	2.41109	0.930953	4.48347	2.1218	3.62481	2.42081	1.33516	3.50646	1.393	0.0880412	0.680167	EXOC3L1	exocyst complex component 3 like 1 [Source:HGNC Symbol;Acc:HGNC:27540]
ENSG00000245552	152.438	379.747	239.255	552.364	160.196	245.581	288.263	183.963	392.564	1.09351	0.0881341	0.680167	AP000787.1	novel transcript, antisense to SESN3
ENSG00000100401	0.952739	2.41109	0	0.896695	0	2.71861	1.16319	0.31758	2.0088	2.66114	0.0882307	0.680167	RANGAP1	Ran GTPase activating protein 1 [Source:HGNC Symbol;Acc:HGNC:9854]
ENSG00000069667	0.952739	2.41109	3.72381	8.96695	0	3.62481	3.2799	1.55885	5.00095	1.68172	0.0882352	0.680167	RORA	RAR related orphan receptor A [Source:HGNC Symbol;Acc:HGNC:10258]
ENSG00000178685	524.006	349.608	399.379	265.422	419.056	372.449	388.32	447.48	329.16	-0.443037	0.0883249	0.680167	PARP10	poly(ADP-ribose) polymerase family member 10 [Source:HGNC Symbol;Acc:HGNC:25895]
ENSG00000132470	13.3383	1.20554	17.6881	7.17356	30.7661	3.62481	12.2994	20.5975	4.00131	-2.36393	0.0884368	0.680167	ITGB4	integrin subunit beta 4 [Source:HGNC Symbol;Acc:HGNC:6158]
ENSG00000136699	161.013	186.859	157.331	164.992	167.622	196.646	172.411	161.989	182.832	0.174628	0.0886007	0.680167	SMPD4	sphingomyelin phosphodiesterase 4 [Source:HGNC Symbol;Acc:HGNC:32949]
ENSG00000054965	27.6294	13.261	14.8952	9.86364	42.436	23.5613	21.9411	28.3202	15.562	-0.863809	0.088715	0.680167	FAM168A	family with sequence similarity 168 member A [Source:HGNC Symbol;Acc:HGNC:28999]
ENSG00000137509	22.8657	25.3164	20.481	29.5909	22.2789	28.9985	24.9219	21.8752	27.9686	0.354512	0.0887746	0.680167	PRCP	prolylcarboxypeptidase [Source:HGNC Symbol;Acc:HGNC:9344]
ENSG00000237568	797.443	536.467	282.079	164.095	595.165	185.772	426.837	558.229	295.445	-0.917969	0.0890171	0.680167	AC099063.1	novel transcript
ENSG00000224660	400.15	331.525	356.555	248.384	451.944	245.581	339.023	402.883	275.163	-0.550072	0.0892329	0.680167	SH3BP5-AS1	SH3BP5 antisense RNA 1 [Source:HGNC Symbol;Acc:HGNC:44501]
ENSG00000151632	179.115	405.063	507.369	952.29	194.145	346.17	430.692	293.543	567.841	0.951914	0.0892399	0.680167	AKR1C2	aldo-keto reductase family 1 member C2 [Source:HGNC Symbol;Acc:HGNC:385]
ENSG00000230489	75.2664	43.3996	49.3405	40.3513	77.4458	43.4978	54.8835	67.3509	42.4162	-0.667081	0.0892644	0.680167	VAV3-AS1	VAV3 antisense RNA 1 [Source:HGNC Symbol;Acc:HGNC:40608]
ENSG00000267282	88.6047	81.977	58.65	36.7645	57.2886	44.404	61.2815	68.1811	54.3818	-0.326248	0.0893866	0.680167	AC011481.2	novel transcript, antisense to PVRL2
ENSG00000120664	0.952739	3.61663	0.930953	1.79339	2.1218	5.43722	2.47546	1.33516	3.61575	1.43728	0.0897581	0.680167	SPART-AS1	SPART antisense RNA 1 [Source:HGNC Symbol;Acc:HGNC:39933]
ENSG00000138107	4.7637	2.41109	3.72381	2.69008	6.3654	2.71861	3.77878	4.95097	2.60659	-0.925545	0.0898048	0.680167	ACTR1A	actin related protein 1A [Source:HGNC Symbol;Acc:HGNC:167]
ENSG00000109163	10.4801	19.2887	13.0333	32.281	19.0962	26.2799	20.0766	14.2032	25.9499	0.869509	0.0898078	0.680167	GNRHR	gonadotropin releasing hormone receptor [Source:HGNC Symbol;Acc:HGNC:4421]
ENSG00000106804	0.952739	3.61663	1.86191	3.58678	1.0609	1.81241	2.14856	1.29185	3.00527	1.21806	0.0900225	0.680167	C5	complement C5 [Source:HGNC Symbol;Acc:HGNC:1331]
ENSG00000198064	5.71643	2.41109	5.58572	4.48347	4.2436	0	3.74005	5.18192	2.29819	-1.17299	0.0903316	0.680167	NPIPB13	nuclear pore complex interacting protein family, member B13 [Source:HGNC Symbol;Acc:HGNC:41989]
ENSG00000204620	212.461	260.398	286.734	312.05	311.905	395.105	296.442	270.366	322.517	0.254461	0.0903774	0.680167	AC115618.1	novel transcript, antisense to RBM3
ENSG00000245970	703.121	1396.02	1047.32	1569.22	588.8	770.273	1012.46	779.748	1245.17	0.675263	0.0903844	0.680167	AP003352.1	novel transcript
ENSG00000173451	114.329	94.0325	106.129	63.6653	135.795	66.1528	96.6839	118.751	74.6169	-0.670364	0.0905613	0.680167	THAP2	THAP domain containing 2 [Source:HGNC Symbol;Acc:HGNC:20854]
ENSG00000162804	26.6767	28.9331	28.8595	33.1777	27.5834	28.9985	29.0382	27.7066	30.3698	0.132408	0.0908003	0.680167	SNED1	sushi, nidogen and EGF like domains 1 [Source:HGNC Symbol;Acc:HGNC:24696]
ENSG00000091844	1.90548	4.82218	0	2.69008	1.0609	1.81241	2.04851	0.988793	3.10822	1.65235	0.0909803	0.680167	RGS17	regulator of G protein signaling 17 [Source:HGNC Symbol;Acc:HGNC:14088]
ENSG00000255850	19.0548	30.1386	23.2738	32.281	11.6699	14.4993	21.8196	17.9995	25.6396	0.510418	0.0911184	0.680167	RXYLT1-AS1	RXYLT1 antisense RNA 1 [Source:HGNC Symbol;Acc:HGNC:48910]
ENSG00000254760	79.0773	43.3996	98.681	38.5579	59.4104	41.6853	60.1353	79.0563	41.2143	-0.939736	0.0912283	0.680167	AC008750.1	novel transcript, antisense to SIGLEC10
ENSG00000111728	60.0226	75.9493	53.0643	61.8719	46.6796	75.2149	62.1338	53.2555	71.012	0.415133	0.0912964	0.680167	ST8SIA1	ST8 alpha-N-acetyl-neuraminide alpha-2,8-sialyltransferase 1 [Source:HGNC Symbol;Acc:HGNC:10869]
ENSG00000099783	8.57465	0	3.72381	0.896695	11.6699	7.24963	5.35245	7.98946	2.71544	-1.55691	0.0912994	0.680167	HNRNPM	heterogeneous nuclear ribonucleoprotein M [Source:HGNC Symbol;Acc:HGNC:5046]
ENSG00000070985	1.90548	0	0.930953	0	3.1827	0	1.00319	2.00638	0	NA	0.0913555	0.680167	TRPM5	transient receptor potential cation channel subfamily M member 5 [Source:HGNC Symbol;Acc:HGNC:14323]
ENSG00000101945	5.71643	0	9.30953	2.69008	5.3045	3.62481	4.44089	6.77682	2.10497	-1.68681	0.0914064	0.680167	SUV39H1	suppressor of variegation 3-9 homolog 1 [Source:HGNC Symbol;Acc:HGNC:11479]
ENSG00000273254	26.6767	43.3996	20.481	55.5951	39.2533	51.6536	39.5099	28.8037	50.2161	0.801897	0.0914813	0.680167	AF129075.3	novel transcript, antisense to USP16
ENSG00000263644	194.359	172.393	232.738	173.959	308.722	225.645	217.969	245.273	190.665	-0.363346	0.0915286	0.680167	AC005828.3	novel transcript, antisense to TANC2
ENSG00000062598	0.952739	2.41109	0.930953	1.79339	0	2.71861	1.4678	0.627897	2.3077	1.87785	0.0917317	0.680167	ELMO2	engulfment and cell motility 2 [Source:HGNC Symbol;Acc:HGNC:17233]
ENSG00000255118	2.85822	3.61663	3.72381	6.27686	4.2436	7.24963	4.66146	3.60854	5.71437	0.663179	0.0918149	0.680167	AP003306.2	novel transcript
ENSG00000253706	368.71	159.132	907.679	164.095	513.476	48.0288	360.187	596.622	123.752	-2.26937	0.091911	0.680167	AC011632.1	novel transcript, antisense to PI15
ENSG00000063015	16.1966	8.43881	14.8952	11.657	25.4616	13.593	15.0404	18.8511	11.2296	-0.747342	0.0923591	0.680167	SEZ6	seizure related 6 homolog [Source:HGNC Symbol;Acc:HGNC:15955]
ENSG00000244158	10.4801	28.9331	0.930953	12.5537	2.1218	7.24963	10.3782	4.51096	16.2455	1.84853	0.0927656	0.680167	Z84488.1	novel transcript
ENSG00000227959	6.66917	19.2887	10.2405	13.4504	9.54811	19.0303	13.0379	8.81925	17.2565	0.968408	0.092769	0.680167	AL451042.2	novel transcript
ENSG00000141568	928.921	871.609	929.091	901.178	953.75	934.295	919.807	937.254	902.361	-0.0547354	0.0932285	0.680167	FOXK2	forkhead box K2 [Source:HGNC Symbol;Acc:HGNC:6036]
ENSG00000241158	338.222	210.97	384.484	211.62	326.757	282.735	292.465	349.821	235.109	-0.57329	0.0932389	0.680167	ADAMTS9-AS1	ADAMTS9 antisense RNA 1 [Source:HGNC Symbol;Acc:HGNC:40625]
ENSG00000234619	4.7637	8.43881	3.72381	6.27686	4.2436	11.7806	6.5379	4.2437	8.83211	1.05743	0.0933233	0.680167	RPL7P11	ribosomal protein L7 pseudogene 11 [Source:HGNC Symbol;Acc:HGNC:35667]
ENSG00000089094	16.1966	13.261	22.3429	17.9339	29.7052	20.8427	20.047	22.7482	17.3459	-0.391163	0.0937185	0.680167	KDM2B	lysine demethylase 2B [Source:HGNC Symbol;Acc:HGNC:13610]
ENSG00000111796	0.952739	8.43881	0	3.58678	1.0609	3.62481	2.94401	0.671213	5.2168	2.95832	0.0937772	0.680167	KLRB1	killer cell lectin like receptor B1 [Source:HGNC Symbol;Acc:HGNC:6373]
ENSG00000101680	0	1.20554	0	1.79339	0	3.62481	1.10396	0	2.20792	NA	0.0937977	0.680167	LAMA1	laminin subunit alpha 1 [Source:HGNC Symbol;Acc:HGNC:6481]
ENSG00000149357	18.102	27.7275	24.2048	29.5909	9.54811	27.1861	22.7266	17.285	28.1682	0.704548	0.0938619	0.680167	LAMTOR1	late endosomal/lysosomal adaptor, MAPK and MTOR activator 1 [Source:HGNC Symbol;Acc:HGNC:26068]
ENSG00000140749	14.2911	8.43881	19.55	14.3471	25.4616	11.7806	15.6449	19.7676	11.5222	-0.778721	0.0940205	0.680167	IGSF6	immunoglobulin superfamily member 6 [Source:HGNC Symbol;Acc:HGNC:5953]
ENSG00000267015	21.913	24.1109	20.481	25.1075	20.1571	21.7489	22.2531	20.8504	23.6557	0.182118	0.094077	0.680167	AC023090.1	novel transcript, antisense to ATP9B
ENSG00000184616	125.762	83.1826	89.3715	78.9091	85.933	51.6536	85.8019	100.355	71.2484	-0.494187	0.094162	0.680167	SPDYE12P	speedy/RINGO cell cycle regulator family member E12, pseudogene [Source:HGNC Symbol;Acc:HGNC:51508]
ENSG00000119509	57.1643	48.2218	45.6167	43.0414	23.3398	18.1241	39.2513	42.0403	36.4624	-0.205363	0.0943759	0.680167	INVS	inversin [Source:HGNC Symbol;Acc:HGNC:17870]
ENSG00000189077	2.85822	0	10.2405	0.896695	11.6699	0	4.27755	8.2562	0.298898	-4.78775	0.0944786	0.680167	TMEM120A	transmembrane protein 120A [Source:HGNC Symbol;Acc:HGNC:21697]
ENSG00000246575	21.913	9.64436	17.6881	7.17356	38.1924	9.96823	17.4299	25.9312	8.92872	-1.53816	0.094486	0.680167	AC093162.3	retinol saturase (all-trans-retinol 13,14-reductase) (RESAT) pseudogene
ENSG00000254019	19.0548	1.20554	14.8952	2.69008	45.6187	9.06203	15.4211	26.5229	4.31922	-2.6184	0.0945316	0.680167	AC011676.2	novel transcript, antisense to SLC45A4
ENSG00000254671	533.534	728.149	574.398	716.459	491.197	540.097	597.306	533.043	661.568	0.311638	0.0945592	0.680167	NA	NA
ENSG00000137942	0	3.61663	0.930953	3.58678	0	0.906203	1.50676	0.310318	2.70321	3.12285	0.0945955	0.680167	FNBP1L	formin binding protein 1 like [Source:HGNC Symbol;Acc:HGNC:20851]
ENSG00000204653	0.952739	2.41109	2.79286	3.58678	3.1827	3.62481	2.7585	2.30943	3.20756	0.473937	0.094686	0.680167	ASPDH	aspartate dehydrogenase domain containing [Source:HGNC Symbol;Acc:HGNC:33856]
ENSG00000187260	44.7787	69.9216	34.4453	44.8347	44.5578	54.3722	48.8184	41.2606	56.3762	0.45032	0.0947444	0.680167	WDR86	WD repeat domain 86 [Source:HGNC Symbol;Acc:HGNC:28020]
ENSG00000125966	49.5424	34.9608	70.7524	42.1447	68.9586	59.8094	54.3614	63.0845	45.6383	-0.46704	0.0949446	0.680167	MMP24	matrix metallopeptidase 24 [Source:HGNC Symbol;Acc:HGNC:7172]
ENSG00000178184	7.62191	1.20554	11.1714	3.58678	6.3654	4.53102	5.74702	8.38625	3.10778	-1.43214	0.0950237	0.680167	PARD6G	par-6 family cell polarity regulator gamma [Source:HGNC Symbol;Acc:HGNC:16076]
ENSG00000229931	160.06	116.938	128.472	86.9794	251.433	145.899	148.297	179.988	116.605	-0.62627	0.0951035	0.680167	ATXN1-AS1	ATXN1 antisense RNA 1 [Source:HGNC Symbol;Acc:HGNC:40515]
ENSG00000261172	937.495	452.079	266.253	143.471	1160.63	818.301	629.704	788.124	471.284	-0.741827	0.0952211	0.680167	AC133919.2	novel transcript
ENSG00000282951	112.423	101.266	133.126	96.843	113.516	94.2451	108.57	119.689	97.4513	-0.296533	0.0952621	0.680167	AC008537.4	novel transcript, antisense to RAB4B
ENSG00000169231	18.102	37.3719	24.2048	30.4876	27.5834	37.1543	29.1507	23.2967	35.0046	0.587416	0.0952843	0.680167	THBS3	thrombospondin 3 [Source:HGNC Symbol;Acc:HGNC:11787]
ENSG00000254459	2.85822	4.82218	5.58572	11.657	1.0609	9.06203	5.84101	3.16828	8.51375	1.4261	0.0953132	0.680167	AP002812.2	novel transcript, antisense to AAMDC
ENSG00000149657	1.90548	4.82218	3.72381	5.38017	0	5.43722	3.54481	1.87643	5.21319	1.47418	0.0953495	0.680167	LSM14B	LSM family member 14B [Source:HGNC Symbol;Acc:HGNC:15887]
ENSG00000120437	36.2041	38.5774	32.5834	42.1447	28.6443	38.0605	36.0357	32.4773	39.5942	0.28586	0.0954561	0.680167	ACAT2	acetyl-CoA acetyltransferase 2 [Source:HGNC Symbol;Acc:HGNC:94]
ENSG00000130876	0	1.20554	1.86191	6.27686	0	2.71861	2.01049	0.620635	3.40034	2.45386	0.0955393	0.680167	SLC7A10	solute carrier family 7 member 10 [Source:HGNC Symbol;Acc:HGNC:11058]
ENSG00000188672	54.3061	31.3442	141.505	52.0083	98.6638	38.0605	69.3146	98.1583	40.471	-1.27822	0.0957488	0.680167	RHCE	Rh blood group CcEe antigens [Source:HGNC Symbol;Acc:HGNC:10008]
ENSG00000169314	13.3383	45.8107	8.37858	23.3141	9.54811	20.8427	20.2054	10.4217	29.9891	1.52485	0.0958442	0.680167	C22orf15	chromosome 22 open reading frame 15 [Source:HGNC Symbol;Acc:HGNC:15558]
ENSG00000254733	207.697	247.137	226.222	384.682	187.779	347.076	266.765	207.233	326.298	0.654939	0.0959852	0.680167	AP001831.1	novel transcript, antisense to ME3
ENSG00000178921	4.7637	6.02772	0.930953	3.58678	6.3654	10.8744	5.42483	4.02002	6.82965	0.764609	0.0960566	0.680167	PFAS	phosphoribosylformylglycinamidine synthase [Source:HGNC Symbol;Acc:HGNC:8863]
ENSG00000272367	150.533	200.12	149.883	218.794	125.186	142.274	164.465	141.868	187.063	0.398977	0.096069	0.680167	NA	NA
ENSG00000272153	20.9603	22.9053	18.6191	25.1075	12.7308	20.8427	20.1943	17.4367	22.9518	0.396481	0.0961052	0.680167	AL365330.1	novel transcript, antisense to LRRC47
ENSG00000179242	0	2.41109	0.930953	4.48347	0	0.906203	1.45529	0.310318	2.60026	3.06684	0.0961154	0.680167	CDH4	cadherin 4 [Source:HGNC Symbol;Acc:HGNC:1763]
ENSG00000227934	8.57465	4.82218	21.4119	18.8306	12.7308	11.7806	13.0251	14.2391	11.8111	-0.269713	0.0961271	0.680167	AL732414.1	ring finger protein 4 (RNF4) pseudogene
ENSG00000226438	294.396	358.047	379.829	395.442	354.341	416.853	366.485	342.855	390.114	0.186296	0.0962298	0.680167	AL442071.1	novel transcript
ENSG00000114779	8.57465	14.4665	7.44762	8.96695	6.3654	12.6868	9.75133	7.46256	12.0401	0.690106	0.0963598	0.680167	ABHD14B	abhydrolase domain containing 14B [Source:HGNC Symbol;Acc:HGNC:28235]
ENSG00000111670	60.0226	63.8939	55.8572	69.9422	10.609	19.0303	46.5592	42.1629	50.9554	0.273262	0.0967837	0.680167	GNPTAB	N-acetylglucosamine-1-phosphate transferase subunits alpha and beta [Source:HGNC Symbol;Acc:HGNC:29670]
ENSG00000123124	53.3534	71.1271	56.7881	60.9752	25.4616	40.7791	51.4141	45.201	57.6272	0.350393	0.0969795	0.680167	WWP1	WW domain containing E3 ubiquitin protein ligase 1 [Source:HGNC Symbol;Acc:HGNC:17004]
ENSG00000108561	0	1.20554	0.930953	1.79339	1.0609	3.62481	1.43593	0.663951	2.20792	1.73354	0.0970186	0.680167	C1QBP	complement C1q binding protein [Source:HGNC Symbol;Acc:HGNC:1243]
ENSG00000161277	3.81096	0	2.79286	0.896695	2.1218	0.906203	1.75475	2.90854	0.600966	-2.27494	0.0971268	0.680167	THAP8	THAP domain containing 8 [Source:HGNC Symbol;Acc:HGNC:23191]
ENSG00000167131	76.2191	81.977	84.7167	88.7728	65.7759	77.9335	79.2325	75.5706	82.8944	0.133451	0.0971551	0.680167	CCDC103	coiled-coil domain containing 103 [Source:HGNC Symbol;Acc:HGNC:32700]
ENSG00000167945	0	2.41109	0	3.58678	0	0.906203	1.15068	0	2.30136	NA	0.0973228	0.680167	NA	NA
ENSG00000236817	0	4.82218	0	7.17356	0	1.81241	2.30136	0	4.60271	NA	0.0973228	0.680167	AL606804.1	novel transcript
ENSG00000269846	0	2.41109	0	3.58678	0	0.906203	1.15068	0	2.30136	NA	0.0973228	0.680167	AL136172.1	novel transcript, antisense to RBL1
ENSG00000232043	128.62	104.882	102.405	96.843	112.455	91.5265	106.122	114.493	97.7506	-0.228086	0.0974764	0.680167	AL133230.2	novel transcript, antisense to PTPN1
ENSG00000141524	56.2116	32.5497	53.0643	47.5248	64.715	45.3102	49.8959	57.997	41.7949	-0.472651	0.0976161	0.680167	TMC6	transmembrane channel like 6 [Source:HGNC Symbol;Acc:HGNC:18021]
ENSG00000197971	17.1493	7.23327	11.1714	5.38017	6.3654	3.62481	8.4874	11.562	5.41275	-1.09496	0.0978265	0.680167	MBP	myelin basic protein [Source:HGNC Symbol;Acc:HGNC:6925]
ENSG00000158864	176.257	127.788	212.257	58.2852	161.257	84.2769	136.687	183.257	90.1166	-1.024	0.0979266	0.680167	NDUFS2	NADH:ubiquinone oxidoreductase core subunit S2 [Source:HGNC Symbol;Acc:HGNC:7708]
ENSG00000227855	5.71643	10.8499	2.79286	13.4504	1.0609	4.53102	6.40026	3.19006	9.61045	1.59102	0.0979485	0.680167	DPY19L2P3	DPY19L2 pseudogene 3 [Source:HGNC Symbol;Acc:HGNC:22367]
ENSG00000160691	0.952739	4.82218	0.930953	4.48347	0	0.906203	2.01592	0.627897	3.40395	2.43861	0.0979697	0.680167	SHC1	SHC adaptor protein 1 [Source:HGNC Symbol;Acc:HGNC:10840]
ENSG00000241684	703.121	522.001	832.272	410.686	662.002	509.286	606.561	732.465	480.658	-0.60775	0.0981176	0.680167	ADAMTS9-AS2	ADAMTS9 antisense RNA 2 [Source:HGNC Symbol;Acc:HGNC:42435]
ENSG00000233547	91.4629	118.143	97.7501	112.984	93.3593	144.086	109.631	94.1908	125.071	0.409091	0.0981221	0.680167	AL158212.2	novel transcript
ENSG00000139908	65.739	61.4828	110.783	98.6364	100.786	83.3707	86.7996	92.436	81.1633	-0.187627	0.0983698	0.680167	TSSK4	testis specific serine kinase 4 [Source:HGNC Symbol;Acc:HGNC:19825]
ENSG00000168148	0.952739	4.82218	1.86191	3.58678	3.1827	4.53102	3.15622	1.99912	4.31332	1.10944	0.0984142	0.680167	H3-4	H3.4 histone [Source:HGNC Symbol;Acc:HGNC:4778]
ENSG00000144642	0	1.20554	0.930953	3.58678	0	0.906203	1.10491	0.310318	1.89951	2.61381	0.0987535	0.680167	RBMS3	RNA binding motif single stranded interacting protein 3 [Source:HGNC Symbol;Acc:HGNC:13427]
ENSG00000110274	21.913	18.0832	20.481	13.4504	20.1571	18.1241	18.7015	20.8504	16.5526	-0.333019	0.0987987	0.680167	CEP164	centrosomal protein 164 [Source:HGNC Symbol;Acc:HGNC:29182]
ENSG00000145242	5.71643	8.43881	11.1714	18.8306	4.2436	15.4055	10.6344	7.04382	14.225	1.01399	0.0992123	0.680167	EPHA5	EPH receptor A5 [Source:HGNC Symbol;Acc:HGNC:3389]
ENSG00000221938	0	3.61663	0	0.896695	2.1218	4.53102	1.86102	0.707267	3.01478	2.09173	0.0992596	0.680167	OR2A14	olfactory receptor family 2 subfamily A member 14 [Source:HGNC Symbol;Acc:HGNC:15084]
ENSG00000151914	2.85822	9.64436	0.930953	8.07025	1.0609	2.71861	4.21388	1.61669	6.81107	2.07484	0.0992669	0.680167	DST	dystonin [Source:HGNC Symbol;Acc:HGNC:1090]
ENSG00000143164	17.1493	36.1663	15.8262	22.4174	10.609	19.0303	20.1997	14.5282	25.8713	0.832501	0.0994932	0.680167	DCAF6	DDB1 and CUL4 associated factor 6 [Source:HGNC Symbol;Acc:HGNC:30002]
ENSG00000223442	106.707	155.515	175.019	206.24	89.1157	101.495	139.015	123.614	154.417	0.320987	0.0995043	0.680167	TH2LCRR	T helper type 2 locus control region associated RNA [Source:HGNC Symbol;Acc:HGNC:40495]
ENSG00000231519	17.1493	19.2887	16.7572	19.7273	18.0353	24.4675	19.2375	17.3139	21.1612	0.289486	0.0996072	0.680167	AC007285.2	novel transcript
ENSG00000238168	6.66917	8.43881	9.30953	13.4504	8.48721	9.96823	9.38723	8.1553	10.6192	0.380859	0.0997689	0.680167	AC137055.1	interferon induced transmembrane protein 3 (IFITM3) pseudogene
ENSG00000204264	12.3856	10.8499	10.2405	3.58678	15.9135	10.8744	10.6418	12.8465	8.43704	-0.60657	0.100056	0.680167	PSMB8	proteasome 20S subunit beta 8 [Source:HGNC Symbol;Acc:HGNC:9545]
ENSG00000185008	0.952739	2.41109	0.930953	3.58678	1.0609	1.81241	1.79248	0.981531	2.60342	1.40731	0.100102	0.680167	ROBO2	roundabout guidance receptor 2 [Source:HGNC Symbol;Acc:HGNC:10250]
ENSG00000173821	313.451	100.06	377.036	215.207	318.27	269.142	265.528	336.252	194.803	-0.787528	0.10021	0.680167	RNF213	ring finger protein 213 [Source:HGNC Symbol;Acc:HGNC:14539]
ENSG00000277873	16.1966	19.2887	18.6191	28.6942	13.7917	27.1861	20.6294	16.2024	25.0563	0.628965	0.100218	0.680167	AC131159.2	novel transcript, antisense to RFC5
ENSG00000143499	0	2.41109	1.86191	2.69008	1.0609	4.53102	2.0925	0.974269	3.21073	1.72051	0.100386	0.680167	SMYD2	SET and MYND domain containing 2 [Source:HGNC Symbol;Acc:HGNC:20982]
ENSG00000099715	6.66917	3.61663	11.1714	0.896695	5.3045	0	4.60974	7.71504	1.50444	-2.35844	0.100531	0.680167	PCDH11Y	protocadherin 11 Y-linked [Source:HGNC Symbol;Acc:HGNC:15813]
ENSG00000136937	13.3383	32.5497	28.8595	44.8347	20.1571	24.4675	27.3678	20.785	33.9506	0.707896	0.100619	0.680167	NCBP1	nuclear cap binding protein subunit 1 [Source:HGNC Symbol;Acc:HGNC:7658]
ENSG00000175894	6.66917	2.41109	6.51667	1.79339	1.0609	0	3.0752	4.74892	1.40149	-1.76063	0.100707	0.680167	TSPEAR	thrombospondin type laminin G domain and EAR repeats [Source:HGNC Symbol;Acc:HGNC:1268]
ENSG00000164253	14.2911	16.8776	15.8262	23.3141	6.3654	17.2179	15.6487	12.1609	19.1365	0.654079	0.100784	0.680167	WDR41	WD repeat domain 41 [Source:HGNC Symbol;Acc:HGNC:25601]
ENSG00000145555	5.71643	7.23327	7.44762	13.4504	3.1827	9.96823	7.83311	5.44892	10.2173	0.906973	0.100879	0.680167	MYO10	myosin X [Source:HGNC Symbol;Acc:HGNC:7593]
ENSG00000137992	3.81096	1.20554	1.86191	0.896695	1.0609	0	1.47267	2.24459	0.700746	-1.67949	0.100903	0.680167	DBT	dihydrolipoamide branched chain transacylase E2 [Source:HGNC Symbol;Acc:HGNC:2698]
ENSG00000197446	10.4801	8.43881	7.44762	6.27686	8.48721	4.53102	7.61028	8.80499	6.41556	-0.456745	0.100922	0.680167	CYP2F1	cytochrome P450 family 2 subfamily F member 1 [Source:HGNC Symbol;Acc:HGNC:2632]
ENSG00000150776	2.85822	1.20554	7.44762	5.38017	3.1827	2.71861	3.79881	4.49618	3.10144	-0.535762	0.101014	0.680167	NKAPD1	NKAP domain containing 1 [Source:HGNC Symbol;Acc:HGNC:25569]
ENSG00000073331	0	1.20554	0	2.69008	0	0.906203	0.800305	0	1.60061	NA	0.101059	0.680167	ALPK1	alpha kinase 1 [Source:HGNC Symbol;Acc:HGNC:20917]
ENSG00000132535	0	1.20554	0	2.69008	0	0.906203	0.800305	0	1.60061	NA	0.101059	0.680167	DLG4	discs large MAGUK scaffold protein 4 [Source:HGNC Symbol;Acc:HGNC:2903]
ENSG00000134200	0	1.20554	0	2.69008	0	0.906203	0.800305	0	1.60061	NA	0.101059	0.680167	TSHB	thyroid stimulating hormone subunit beta [Source:HGNC Symbol;Acc:HGNC:12372]
ENSG00000147459	0	1.20554	0	2.69008	0	0.906203	0.800305	0	1.60061	NA	0.101059	0.680167	DOCK5	dedicator of cytokinesis 5 [Source:HGNC Symbol;Acc:HGNC:23476]
ENSG00000151789	0	1.20554	0	2.69008	0	0.906203	0.800305	0	1.60061	NA	0.101059	0.680167	ZNF385D	zinc finger protein 385D [Source:HGNC Symbol;Acc:HGNC:26191]
ENSG00000155846	0	2.41109	0	5.38017	0	1.81241	1.60061	0	3.20122	NA	0.101059	0.680167	PPARGC1B	PPARG coactivator 1 beta [Source:HGNC Symbol;Acc:HGNC:30022]
ENSG00000172987	0	1.20554	0	2.69008	0	0.906203	0.800305	0	1.60061	NA	0.101059	0.680167	HPSE2	heparanase 2 (inactive) [Source:HGNC Symbol;Acc:HGNC:18374]
ENSG00000185596	0	1.20554	0	2.69008	0	0.906203	0.800305	0	1.60061	NA	0.101059	0.680167	WASH3P	WASP family homolog 3, pseudogene [Source:HGNC Symbol;Acc:HGNC:24362]
ENSG00000213988	0	1.20554	0	2.69008	0	0.906203	0.800305	0	1.60061	NA	0.101059	0.680167	ZNF90	zinc finger protein 90 [Source:HGNC Symbol;Acc:HGNC:13165]
ENSG00000234557	6.66917	1.20554	7.44762	2.69008	2.1218	0.906203	3.50674	5.41287	1.60061	-1.75777	0.101136	0.680167	PPIAP90	peptidylprolyl isomerase A pseudogene 90 [Source:HGNC Symbol;Acc:HGNC:53714]
ENSG00000092531	12.3856	15.6721	13.9643	28.6942	13.7917	27.1861	18.6157	13.3805	23.8508	0.833902	0.10128	0.680167	SNAP23	synaptosome associated protein 23 [Source:HGNC Symbol;Acc:HGNC:11131]
ENSG00000205537	34.2986	28.9331	32.5834	12.5537	41.3751	17.2179	27.827	36.0857	19.5682	-0.882915	0.101368	0.680167	AC121338.1	novel transcript, antisense to VDR
ENSG00000105321	0	2.41109	0	2.69008	2.1218	2.71861	1.65693	0.707267	2.60659	1.88184	0.101518	0.680167	CCDC9	coiled-coil domain containing 9 [Source:HGNC Symbol;Acc:HGNC:24560]
ENSG00000169432	0	2.41109	0	2.69008	2.1218	2.71861	1.65693	0.707267	2.60659	1.88184	0.101518	0.680167	SCN9A	sodium voltage-gated channel alpha subunit 9 [Source:HGNC Symbol;Acc:HGNC:10597]
ENSG00000173926	13.3383	2.41109	2.79286	0	8.48721	1.81241	4.80698	8.20614	1.40783	-2.54323	0.101532	0.680167	MARCHF3	membrane associated ring-CH-type finger 3 [Source:HGNC Symbol;Acc:HGNC:28728]
ENSG00000170236	3.81096	13.261	6.51667	10.7603	3.1827	6.34342	7.31251	4.50344	10.1216	1.16833	0.101536	0.680167	USP50	ubiquitin specific peptidase 50 [Source:HGNC Symbol;Acc:HGNC:20079]
ENSG00000233452	29.5349	20.4943	33.5143	10.7603	33.9488	25.3737	25.6044	32.3327	18.8761	-0.776433	0.101569	0.680167	STXBP5-AS1	STXBP5 antisense RNA 1 [Source:HGNC Symbol;Acc:HGNC:44183]
ENSG00000121380	1068.02	1124.77	1645.92	1874.99	1115.01	1371.09	1366.63	1276.32	1456.95	0.190963	0.101573	0.680167	BCL2L14	BCL2 like 14 [Source:HGNC Symbol;Acc:HGNC:16657]
ENSG00000130254	246.759	155.515	198.293	173.959	218.546	165.835	193.151	221.199	165.103	-0.42198	0.101589	0.680167	SAFB2	scaffold attachment factor B2 [Source:HGNC Symbol;Acc:HGNC:21605]
ENSG00000197429	6.66917	2.41109	1.86191	0.896695	3.1827	0	2.50359	3.90459	1.10259	-1.82427	0.101759	0.680167	IPP	intracisternal A particle-promoted polypeptide [Source:HGNC Symbol;Acc:HGNC:6108]
ENSG00000269743	6.66917	4.82218	11.1714	8.96695	9.54811	9.06203	8.37331	9.12957	7.61705	-0.261314	0.101822	0.680167	SLC25A53	solute carrier family 25 member 53 [Source:HGNC Symbol;Acc:HGNC:31894]
ENSG00000257058	0.952739	4.82218	0.930953	1.79339	0	3.62481	2.02068	0.627897	3.41346	2.44263	0.10183	0.680167	AP001363.2	novel transcript
ENSG00000186777	6.66917	6.02772	4.65477	1.79339	6.3654	3.62481	4.85588	5.89645	3.81531	-0.628046	0.101916	0.680167	ZNF732	zinc finger protein 732 [Source:HGNC Symbol;Acc:HGNC:37138]
ENSG00000014919	80.9828	66.305	85.6477	60.0786	99.7247	49.8412	73.7633	88.7851	58.7416	-0.595935	0.101956	0.680167	COX15	cytochrome c oxidase assembly homolog COX15 [Source:HGNC Symbol;Acc:HGNC:2263]
ENSG00000131650	4.7637	2.41109	4.65477	0	8.48721	0	3.38613	5.96856	0.803696	-2.89266	0.101975	0.680167	KREMEN2	kringle containing transmembrane protein 2 [Source:HGNC Symbol;Acc:HGNC:18797]
ENSG00000130724	5.71643	3.61663	3.72381	1.79339	3.1827	2.71861	3.4586	4.20765	2.70954	-0.634964	0.102092	0.680167	CHMP2A	charged multivesicular body protein 2A [Source:HGNC Symbol;Acc:HGNC:30216]
ENSG00000263990	374.426	390.596	301.629	358.678	338.427	368.825	355.43	338.161	372.7	0.140304	0.102213	0.680167	AC004253.1	novel transcript
ENSG00000254102	0.952739	8.43881	4.65477	7.17356	2.1218	5.43722	4.79648	2.57644	7.01653	1.44538	0.102218	0.680167	AC090136.3	novel transcript
ENSG00000159128	146.722	216.998	146.16	179.339	120.943	143.18	158.89	137.941	179.839	0.382651	0.102247	0.680167	IFNGR2	interferon gamma receptor 2 [Source:HGNC Symbol;Acc:HGNC:5440]
ENSG00000168487	2.85822	0	2.79286	1.79339	2.1218	0.906203	1.74541	2.59096	0.899864	-1.52571	0.102292	0.680167	BMP1	bone morphogenetic protein 1 [Source:HGNC Symbol;Acc:HGNC:1067]
ENSG00000119929	216.272	270.042	311.869	342.537	275.834	380.605	299.527	267.992	331.062	0.304911	0.102317	0.680167	CUTC	cutC copper transporter [Source:HGNC Symbol;Acc:HGNC:24271]
ENSG00000275807	37.1568	42.1941	27.9286	33.1777	26.5225	39.8729	34.4754	30.536	38.4149	0.331156	0.102425	0.680167	AC145285.6	novel transcript, antisense to ATXN2L
ENSG00000179532	64.7863	48.2218	118.231	81.5992	76.3849	64.3404	75.5939	86.4674	64.7205	-0.417934	0.102496	0.680167	DNHD1	dynein heavy chain domain 1 [Source:HGNC Symbol;Acc:HGNC:26532]
ENSG00000251513	273.436	307.414	221.567	286.942	218.546	237.425	257.555	237.85	277.26	0.221193	0.102509	0.680167	LIX1-AS1	LIX1 and RIOK2 antisense RNA 1 [Source:HGNC Symbol;Acc:HGNC:52976]
ENSG00000274265	206.744	135.021	224.36	62.7686	265.225	211.145	184.211	232.11	136.312	-0.767898	0.102513	0.680167	AC245297.4	novel transcript
ENSG00000101220	0.952739	2.41109	0.930953	5.38017	0	6.34342	2.66973	0.627897	4.71156	2.9076	0.10288	0.680167	C20orf27	chromosome 20 open reading frame 27 [Source:HGNC Symbol;Acc:HGNC:15873]
ENSG00000231312	33.3459	28.9331	36.3072	27.7975	33.9488	18.1241	29.7428	34.534	24.9516	-0.468886	0.102932	0.680167	MAP4K3-DT	MAP4K3 divergent transcript [Source:HGNC Symbol;Acc:HGNC:54056]
ENSG00000232815	0.952739	0	5.58572	1.79339	5.3045	0.906203	2.42376	3.94765	0.899864	-2.13322	0.103003	0.680167	DUX4L50	double homeobox 4 like 50 (pseudogene) [Source:HGNC Symbol;Acc:HGNC:51788]
ENSG00000167112	0.952739	3.61663	0.930953	3.58678	2.1218	2.71861	2.32125	1.33516	3.30734	1.30865	0.103122	0.680167	TRUB2	TruB pseudouridine synthase family member 2 [Source:HGNC Symbol;Acc:HGNC:17170]
ENSG00000251655	2.85822	10.8499	29.7905	38.5579	18.0353	19.9365	20.0047	16.8947	23.1147	0.452245	0.103294	0.680167	PRB1	proline rich protein BstNI subfamily 1 (gene/pseudogene) [Source:HGNC Symbol;Acc:HGNC:9337]
ENSG00000213744	5.71643	0	9.30953	8.07025	12.7308	8.15583	7.33048	9.25226	5.40869	-0.774525	0.103509	0.680167	RPS10P14	ribosomal protein S10 pseudogene 14 [Source:HGNC Symbol;Acc:HGNC:35880]
ENSG00000143036	16.1966	10.8499	25.1357	11.657	30.7661	9.06203	17.2779	24.0328	10.523	-1.19146	0.103539	0.680167	SLC44A3	solute carrier family 44 member 3 [Source:HGNC Symbol;Acc:HGNC:28689]
ENSG00000174243	0.952739	3.61663	0	2.69008	2.1218	2.71861	2.01664	1.02485	3.00844	1.55361	0.103569	0.680167	DDX23	DEAD-box helicase 23 [Source:HGNC Symbol;Acc:HGNC:17347]
ENSG00000175854	35.2513	32.5497	40.031	28.6942	42.436	29.9047	34.8112	39.2395	30.3829	-0.369046	0.103604	0.680167	SWI5	SWI5 homologous recombination repair protein [Source:HGNC Symbol;Acc:HGNC:31412]
ENSG00000258334	11.4329	16.8776	13.0333	34.9711	38.1924	51.6536	27.6935	20.8862	34.5008	0.724077	0.103654	0.680167	AC125611.4	novel transcript, antisense to PRPH
ENSG00000065675	9.52739	4.82218	15.8262	9.86364	26.5225	12.6868	13.2081	17.292	9.12422	-0.922334	0.103676	0.680167	PRKCQ	protein kinase C theta [Source:HGNC Symbol;Acc:HGNC:9410]
ENSG00000239677	34.2986	21.6998	68.8905	10.7603	60.4713	14.4993	35.1033	54.5535	15.6531	-1.80122	0.103726	0.680167	PDZRN3-AS1	PDZRN3 antisense RNA 1 [Source:HGNC Symbol;Acc:HGNC:40814]
ENSG00000254206	109.565	131.404	92.1644	122.847	151.709	219.301	137.832	117.813	157.851	0.422067	0.103756	0.680167	NPIPB11	nuclear pore complex interacting protein family member B11 [Source:HGNC Symbol;Acc:HGNC:37453]
ENSG00000248636	8.57465	9.64436	12.1024	13.4504	9.54811	12.6868	11.0011	10.075	11.9272	0.243469	0.103787	0.680167	AC002070.1	novel transcript
ENSG00000197291	46.6842	43.3996	51.2024	35.8678	55.1668	41.6853	45.6677	51.0178	40.3176	-0.339592	0.103831	0.680167	RAMP2-AS1	RAMP2 antisense RNA 1 [Source:HGNC Symbol;Acc:HGNC:44358]
ENSG00000119457	16.1966	15.6721	8.37858	6.27686	10.609	8.15583	10.8815	11.728	10.0349	-0.224933	0.103918	0.680167	SLC46A2	solute carrier family 46 member 2 [Source:HGNC Symbol;Acc:HGNC:16055]
ENSG00000138814	0	1.20554	0	0.896695	0	2.71861	0.803475	0	1.60695	NA	0.103936	0.680167	PPP3CA	protein phosphatase 3 catalytic subunit alpha [Source:HGNC Symbol;Acc:HGNC:9314]
ENSG00000157216	0	2.41109	0	1.79339	0	5.43722	1.60695	0	3.2139	NA	0.103936	0.680167	SSBP3	single stranded DNA binding protein 3 [Source:HGNC Symbol;Acc:HGNC:15674]
ENSG00000259291	136.242	84.3881	89.3715	78.0125	125.186	86.0893	99.8816	116.933	82.83	-0.49746	0.104035	0.680167	ZNF710-AS1	ZNF710 antisense RNA 1 [Source:HGNC Symbol;Acc:HGNC:53141]
ENSG00000229598	12.3856	6.02772	17.6881	4.48347	26.5225	2.71861	11.6377	18.8654	4.40994	-2.09691	0.104319	0.680167	PRDX3P1	peroxiredoxin 3 pseudogene 1 [Source:HGNC Symbol;Acc:HGNC:39264]
ENSG00000148773	4.7637	6.02772	9.30953	13.4504	10.609	16.3117	10.0787	8.22741	11.9299	0.536076	0.10433	0.680167	MKI67	marker of proliferation Ki-67 [Source:HGNC Symbol;Acc:HGNC:7107]
ENSG00000007047	80.0301	63.8939	97.7501	55.5951	84.8721	68.8714	75.1688	87.5507	62.7868	-0.479658	0.104353	0.680167	MARK4	microtubule affinity regulating kinase 4 [Source:HGNC Symbol;Acc:HGNC:13538]
ENSG00000259314	49.5424	45.8107	60.5119	47.5248	67.8977	50.7474	53.6725	59.3173	48.0276	-0.304589	0.104408	0.680167	AC103739.2	novel transcript, antisense to CRTC3
ENSG00000160111	7.62191	6.02772	9.30953	1.79339	13.7917	7.24963	7.63232	10.2411	5.02358	-1.02758	0.104476	0.680167	CPAMD8	C3 and PZP like alpha-2-macroglobulin domain containing 8 [Source:HGNC Symbol;Acc:HGNC:23228]
ENSG00000099219	231.516	220.615	216.912	173.959	222.789	171.272	206.177	223.739	188.615	-0.24637	0.104752	0.680167	ERMP1	endoplasmic reticulum metallopeptidase 1 [Source:HGNC Symbol;Acc:HGNC:23703]
ENSG00000151773	1.90548	1.20554	0.930953	0	2.1218	0	1.0273	1.65274	0.401848	-2.04014	0.104874	0.680167	CCDC122	coiled-coil domain containing 122 [Source:HGNC Symbol;Acc:HGNC:26478]
ENSG00000154162	12.3856	12.0554	10.2405	9.86364	6.3654	5.43722	9.3913	9.66383	9.11877	-0.0837563	0.104948	0.680167	CDH12	cadherin 12 [Source:HGNC Symbol;Acc:HGNC:1751]
ENSG00000087470	64.7863	73.5382	72.6143	112.087	56.2277	96.9637	79.3695	64.5428	94.1963	0.545414	0.105113	0.680167	DNM1L	dynamin 1 like [Source:HGNC Symbol;Acc:HGNC:2973]
ENSG00000111752	12.3856	6.02772	33.5143	13.4504	25.4616	16.3117	17.8586	23.7872	11.9299	-0.995598	0.105128	0.680167	PHC1	polyhomeotic homolog 1 [Source:HGNC Symbol;Acc:HGNC:3182]
ENSG00000129235	10.4801	20.4943	13.0333	21.5207	4.2436	6.34342	12.6859	9.25236	16.1195	0.80091	0.10529	0.680167	TXNDC17	thioredoxin domain containing 17 [Source:HGNC Symbol;Acc:HGNC:28218]
ENSG00000198586	2.85822	0	1.86191	0.896695	2.1218	0.906203	1.4408	2.28064	0.600966	-1.92408	0.105522	0.680167	TLK1	tousled like kinase 1 [Source:HGNC Symbol;Acc:HGNC:11841]
ENSG00000121957	69.55	97.6491	93.0953	99.5331	71.0804	89.7141	86.7703	77.9085	95.6321	0.295714	0.10567	0.680167	GPSM2	G protein signaling modulator 2 [Source:HGNC Symbol;Acc:HGNC:29501]
ENSG00000176697	8.57465	6.02772	7.44762	6.27686	11.6699	10.8744	8.47853	9.23073	7.72634	-0.256659	0.105751	0.680167	BDNF	brain derived neurotrophic factor [Source:HGNC Symbol;Acc:HGNC:1033]
ENSG00000138735	35.2513	40.9885	30.7215	53.8017	24.4007	38.0605	37.204	30.1245	44.2836	0.555834	0.105814	0.680167	PDE5A	phosphodiesterase 5A [Source:HGNC Symbol;Acc:HGNC:8784]
ENSG00000188372	17.1493	15.6721	12.1024	6.27686	10.609	7.24963	11.5099	13.2869	9.73286	-0.449069	0.105925	0.680167	ZP3	zona pellucida glycoprotein 3 [Source:HGNC Symbol;Acc:HGNC:13189]
ENSG00000154727	16.1966	32.5497	27.9286	32.281	7.42631	16.3117	22.1156	17.1838	27.0475	0.654442	0.106155	0.680167	GABPA	GA binding protein transcription factor subunit alpha [Source:HGNC Symbol;Acc:HGNC:4071]
ENSG00000101868	35.2513	42.1941	41.8929	73.529	27.5834	49.8412	45.0486	34.9092	55.1881	0.660748	0.106248	0.680167	POLA1	DNA polymerase alpha 1, catalytic subunit [Source:HGNC Symbol;Acc:HGNC:9173]
ENSG00000102886	4.7637	0	2.79286	1.79339	6.3654	1.81241	2.92129	4.64065	1.20193	-1.94897	0.106364	0.680167	GDPD3	glycerophosphodiester phosphodiesterase domain containing 3 [Source:HGNC Symbol;Acc:HGNC:28638]
ENSG00000162144	0	7.23327	0.930953	11.657	2.1218	4.53102	4.41235	1.01758	7.80711	2.93964	0.106367	0.680167	CYB561A3	cytochrome b561 family member A3 [Source:HGNC Symbol;Acc:HGNC:23014]
ENSG00000139624	21.913	27.7275	21.4119	49.3182	16.9744	38.9667	29.3853	20.0998	38.6708	0.944066	0.10658	0.680167	CERS5	ceramide synthase 5 [Source:HGNC Symbol;Acc:HGNC:23749]
ENSG00000259642	43.826	9.64436	16.7572	7.17356	56.2277	10.8744	24.0839	38.937	9.23078	-2.07662	0.106644	0.680167	ST20-AS1	ST20 antisense RNA 1 [Source:HGNC Symbol;Acc:HGNC:27521]
ENSG00000120656	6.66917	8.43881	2.79286	8.07025	9.54811	11.7806	7.88331	6.33671	9.4299	0.573508	0.10666	0.680167	TAF12	TATA-box binding protein associated factor 12 [Source:HGNC Symbol;Acc:HGNC:11545]
ENSG00000196449	0.952739	3.61663	0.930953	4.48347	1.0609	1.81241	2.14285	0.981531	3.30417	1.75118	0.10671	0.680167	YRDC	yrdC N6-threonylcarbamoyltransferase domain containing [Source:HGNC Symbol;Acc:HGNC:28905]
ENSG00000184924	9.52739	4.82218	1.86191	0.896695	8.48721	4.53102	5.02107	6.6255	3.41663	-0.955456	0.106831	0.680167	PTRHD1	peptidyl-tRNA hydrolase domain containing 1 [Source:HGNC Symbol;Acc:HGNC:33782]
ENSG00000241525	16.1966	21.6998	34.4453	52.905	16.9744	42.5915	30.8021	22.5387	39.0654	0.793486	0.106897	0.680167	AC141424.1	novel transcript, antisense to C17orf97
ENSG00000151687	40.015	47.0162	40.031	65.4587	33.9488	47.1226	45.5987	37.9983	53.1992	0.48547	0.106928	0.680167	ANKAR	ankyrin and armadillo repeat containing [Source:HGNC Symbol;Acc:HGNC:26350]
ENSG00000170348	0	3.61663	0.930953	1.79339	2.1218	6.34342	2.4677	1.01758	3.91782	1.9449	0.107035	0.680167	TMED10	transmembrane p24 trafficking protein 10 [Source:HGNC Symbol;Acc:HGNC:16998]
ENSG00000131584	4.7637	7.23327	1.86191	13.4504	4.2436	12.6868	7.37329	3.62307	11.1235	1.61833	0.107092	0.680167	ACAP3	ArfGAP with coiled-coil, ankyrin repeat and PH domains 3 [Source:HGNC Symbol;Acc:HGNC:16754]
ENSG00000186815	8.57465	3.61663	3.72381	2.69008	7.42631	3.62481	4.94272	6.57492	3.31051	-0.98992	0.10714	0.680167	TPCN1	two pore segment channel 1 [Source:HGNC Symbol;Acc:HGNC:18182]
ENSG00000213608	1.90548	3.61663	2.79286	4.48347	0	4.53102	2.88824	1.56611	4.21037	1.42676	0.107204	0.680167	SLC25A14P1	solute carrier family 25 member 14 pseudogene 1 [Source:HGNC Symbol;Acc:HGNC:43856]
ENSG00000168314	3.81096	0	1.86191	0.896695	7.42631	2.71861	2.78575	4.36639	1.2051	-1.85729	0.107249	0.680167	MOBP	myelin associated oligodendrocyte basic protein [Source:HGNC Symbol;Acc:HGNC:7189]
ENSG00000127954	0	1.20554	0.930953	1.79339	0	2.71861	1.10808	0.310318	1.90585	2.61862	0.107512	0.680167	STEAP4	STEAP4 metalloreductase [Source:HGNC Symbol;Acc:HGNC:21923]
ENSG00000181481	0	1.20554	0.930953	1.79339	0	2.71861	1.10808	0.310318	1.90585	2.61862	0.107512	0.680167	RNF135	ring finger protein 135 [Source:HGNC Symbol;Acc:HGNC:21158]
ENSG00000272558	0.952739	0	2.79286	0	4.2436	0	1.33153	2.66307	0	NA	0.107604	0.680167	U91328.2	novel transcript, antisense to TRIM38
ENSG00000124275	82.8883	88.0048	102.405	121.95	76.3849	86.9955	93.1048	87.226	98.9836	0.182431	0.107631	0.680167	MTRR	5-methyltetrahydrofolate-homocysteine methyltransferase reductase [Source:HGNC Symbol;Acc:HGNC:7473]
ENSG00000237491	11.4329	10.8499	7.44762	6.27686	8.48721	8.15583	8.77505	9.12257	8.42753	-0.11433	0.107741	0.680167	LINC01409	long intergenic non-protein coding RNA 1409 [Source:HGNC Symbol;Acc:HGNC:50701]
ENSG00000254988	43.826	49.4273	48.4096	69.0455	38.1924	48.935	49.6393	43.476	55.8026	0.360113	0.107782	0.680167	AP002498.1	novel transcript
ENSG00000224116	224.846	119.349	280.217	64.562	448.761	48.0288	197.627	317.941	77.3132	-2.03997	0.107811	0.680167	INHBA-AS1	INHBA antisense RNA 1 [Source:HGNC Symbol;Acc:HGNC:40303]
ENSG00000175197	21.913	6.02772	15.8262	7.17356	15.9135	11.7806	13.1058	17.8842	8.32731	-1.10277	0.107894	0.680167	DDIT3	DNA damage inducible transcript 3 [Source:HGNC Symbol;Acc:HGNC:2726]
ENSG00000100285	12.3856	2.41109	28.8595	12.5537	20.1571	16.3117	15.4465	20.4674	10.4255	-0.973214	0.107937	0.680167	NEFH	neurofilament heavy [Source:HGNC Symbol;Acc:HGNC:7737]
ENSG00000020577	4.7637	0	6.51667	0	3.1827	1.81241	2.71258	4.82102	0.604135	-2.9964	0.107941	0.680167	SAMD4A	sterile alpha motif domain containing 4A [Source:HGNC Symbol;Acc:HGNC:23023]
ENSG00000048991	0	2.41109	0	0.896695	0	0.906203	0.702331	0	1.40466	NA	0.107956	0.680167	R3HDM1	R3H domain containing 1 [Source:HGNC Symbol;Acc:HGNC:9757]
ENSG00000096401	0	2.41109	0	0.896695	0	0.906203	0.702331	0	1.40466	NA	0.107956	0.680167	CDC5L	cell division cycle 5 like [Source:HGNC Symbol;Acc:HGNC:1743]
ENSG00000157510	0	2.41109	0	0.896695	0	0.906203	0.702331	0	1.40466	NA	0.107956	0.680167	AFAP1L1	actin filament associated protein 1 like 1 [Source:HGNC Symbol;Acc:HGNC:26714]
ENSG00000168090	0	2.41109	0	0.896695	0	0.906203	0.702331	0	1.40466	NA	0.107956	0.680167	COPS6	COP9 signalosome subunit 6 [Source:HGNC Symbol;Acc:HGNC:21749]
ENSG00000162438	2.85822	0	0.930953	0	4.2436	0	1.3388	2.67759	0	NA	0.1082	0.680167	CTRC	chymotrypsin C [Source:HGNC Symbol;Acc:HGNC:2523]
ENSG00000257529	411.583	333.936	329.557	238.521	495.441	270.049	346.514	412.194	280.835	-0.5536	0.108405	0.680167	RPL36A-HNRNPH2	RPL36A-HNRNPH2 readthrough [Source:HGNC Symbol;Acc:HGNC:48349]
ENSG00000142512	8.57465	3.61663	6.51667	4.48347	5.3045	3.62481	5.35346	6.79861	3.90831	-0.798696	0.10856	0.680167	SIGLEC10	sialic acid binding Ig like lectin 10 [Source:HGNC Symbol;Acc:HGNC:15620]
ENSG00000229313	0	3.61663	2.79286	3.58678	2.1218	4.53102	2.77485	1.63822	3.91148	1.25558	0.108691	0.680167	AL133268.3	novel transcript
ENSG00000164512	4.7637	3.61663	10.2405	4.48347	8.48721	3.62481	5.86938	7.83046	3.90831	-1.00255	0.108768	0.680167	ANKRD55	ankyrin repeat domain 55 [Source:HGNC Symbol;Acc:HGNC:25681]
ENSG00000256453	62.8808	53.044	89.3715	78.0125	95.4811	67.059	74.3081	82.5778	66.0385	-0.322447	0.108953	0.680167	DND1	DND microRNA-mediated repression inhibitor 1 [Source:HGNC Symbol;Acc:HGNC:23799]
ENSG00000112584	7.62191	2.41109	3.72381	2.69008	6.3654	1.81241	4.10412	5.90371	2.30453	-1.35715	0.108988	0.680167	FAM120B	family with sequence similarity 120B [Source:HGNC Symbol;Acc:HGNC:21109]
ENSG00000077498	9.52739	2.41109	8.37858	6.27686	4.2436	0.906203	5.29062	7.38319	3.19805	-1.20705	0.109055	0.680167	TYR	tyrosinase [Source:HGNC Symbol;Acc:HGNC:12442]
ENSG00000259577	12.3856	27.7275	24.2048	80.7025	19.0962	48.0288	35.3576	18.5622	52.1529	1.49038	0.109061	0.680167	CERNA1	competing endogenous lncRNA 1 for miR-4707-5p and miR-4767 [Source:HGNC Symbol;Acc:HGNC:52664]
ENSG00000234040	55.2589	45.8107	53.0643	21.5207	62.5931	48.0288	47.7127	56.9721	38.4534	-0.567146	0.109151	0.680167	RPL10P12	ribosomal protein L10 pseudogene 12 [Source:HGNC Symbol;Acc:HGNC:52345]
ENSG00000072858	3.81096	0	2.79286	0.896695	1.0609	0	1.4269	2.55491	0.298898	-3.09554	0.109263	0.680167	SIDT1	SID1 transmembrane family member 1 [Source:HGNC Symbol;Acc:HGNC:25967]
ENSG00000175206	47.637	22.9053	41.8929	23.3141	59.4104	54.3722	41.5886	49.6468	33.5305	-0.566224	0.109319	0.680167	NPPA	natriuretic peptide A [Source:HGNC Symbol;Acc:HGNC:7939]
ENSG00000237945	7.62191	47.0162	18.6191	32.281	16.9744	32.6233	25.856	14.4051	37.3069	1.37286	0.109327	0.680167	LINC00649	long intergenic non-protein coding RNA 649 [Source:HGNC Symbol;Acc:HGNC:44305]
ENSG00000123329	147.675	136.227	156.4	102.223	207.937	150.43	150.148	170.67	129.626	-0.396852	0.109509	0.680167	ARHGAP9	Rho GTPase activating protein 9 [Source:HGNC Symbol;Acc:HGNC:14130]
ENSG00000159189	1.90548	2.41109	0	0.896695	0	1.81241	1.17094	0.635159	1.70673	1.42604	0.109548	0.680167	C1QC	complement C1q C chain [Source:HGNC Symbol;Acc:HGNC:1245]
ENSG00000085999	49.5424	56.6606	24.2048	60.0786	28.6443	62.528	46.9431	34.1305	59.7557	0.808015	0.109767	0.680167	RAD54L	RAD54 like [Source:HGNC Symbol;Acc:HGNC:9826]
ENSG00000010803	9.52739	13.261	3.72381	4.48347	5.3045	9.06203	7.56037	6.18524	8.9355	0.53072	0.109816	0.680167	SCMH1	Scm polycomb group protein homolog 1 [Source:HGNC Symbol;Acc:HGNC:19003]
ENSG00000279035	47.637	55.4551	30.7215	52.905	40.3142	48.935	45.9946	39.5575	52.4317	0.406486	0.109868	0.680167	AC022211.5	TEC
ENSG00000168906	9.52739	8.43881	9.30953	7.17356	9.54811	5.43722	8.2391	9.46168	7.01653	-0.431338	0.110057	0.680167	MAT2A	methionine adenosyltransferase 2A [Source:HGNC Symbol;Acc:HGNC:6904]
ENSG00000223799	4.7637	1.20554	3.72381	2.69008	9.54811	4.53102	4.41038	6.01187	2.80888	-1.09782	0.110512	0.680167	IL10RB-DT	IL10RB divergent transcript [Source:HGNC Symbol;Acc:HGNC:44303]
ENSG00000264745	5.71643	9.64436	3.72381	9.86364	3.1827	4.53102	6.11033	4.20765	8.01301	0.929329	0.110808	0.680167	TTC39C-AS1	TTC39C antisense RNA 1 [Source:HGNC Symbol;Acc:HGNC:51321]
ENSG00000232070	0.952739	4.82218	0	3.58678	1.0609	1.81241	2.03917	0.671213	3.40712	2.34371	0.110829	0.680167	TMEM253	transmembrane protein 253 [Source:HGNC Symbol;Acc:HGNC:32545]
ENSG00000224743	135.289	103.677	238.324	122.847	76.3849	19.0303	115.925	149.999	81.8514	-0.873876	0.110874	0.680167	TEX26-AS1	TEX26 antisense RNA 1 [Source:HGNC Symbol;Acc:HGNC:42784]
ENSG00000259351	10.4801	3.61663	15.8262	7.17356	31.827	10.8744	13.2997	19.3778	7.22154	-1.42402	0.111037	0.680167	AC015914.1	novel transcript, antisense to DAPK2
ENSG00000185022	1.90548	1.20554	2.79286	1.79339	3.1827	0.906203	1.96436	2.62701	1.30171	-1.01301	0.11127	0.680167	MAFF	MAF bZIP transcription factor F [Source:HGNC Symbol;Acc:HGNC:6780]
ENSG00000166135	145.769	116.938	140.574	109.397	122.004	115.994	125.113	136.116	114.11	-0.254412	0.111276	0.680167	HIF1AN	hypoxia inducible factor 1 subunit alpha inhibitor [Source:HGNC Symbol;Acc:HGNC:17113]
ENSG00000180347	0.952739	0	3.72381	0.896695	5.3045	0.906203	1.96399	3.32702	0.600966	-2.46887	0.111574	0.680167	ITPRID1	ITPR interacting domain containing 1 [Source:HGNC Symbol;Acc:HGNC:27363]
ENSG00000233885	293.444	324.291	173.157	195.479	218.546	224.738	238.276	228.382	248.17	0.119878	0.111576	0.680167	YEATS2-AS1	YEATS2 antisense RNA 1 [Source:HGNC Symbol;Acc:HGNC:41101]
ENSG00000087365	0	2.41109	0	3.58678	1.0609	1.81241	1.47853	0.353634	2.60342	2.88008	0.111688	0.680167	SF3B2	splicing factor 3b subunit 2 [Source:HGNC Symbol;Acc:HGNC:10769]
ENSG00000125450	27.6294	16.8776	24.2048	20.624	29.7052	25.3737	24.0691	27.1798	20.9584	-0.375005	0.111792	0.680167	NUP85	nucleoporin 85 [Source:HGNC Symbol;Acc:HGNC:8734]
ENSG00000275553	0	1.20554	6.51667	12.5537	7.42631	11.7806	6.58048	4.64766	8.5133	0.873215	0.112066	0.680167	ELOA3C	elongin A3 family member C [Source:HGNC Symbol;Acc:HGNC:52410]
ENSG00000085224	0	2.41109	3.72381	4.48347	0	3.62481	2.37386	1.24127	3.50646	1.4982	0.112196	0.680167	ATRX	ATRX chromatin remodeler [Source:HGNC Symbol;Acc:HGNC:886]
ENSG00000132676	40.9678	13.261	40.9619	29.5909	30.7661	21.7489	29.5494	37.5653	21.5336	-0.80281	0.112213	0.680167	DAP3	death associated protein 3 [Source:HGNC Symbol;Acc:HGNC:2673]
ENSG00000144061	4.7637	0	6.51667	0.896695	1.0609	0	2.20633	4.11376	0.298898	-3.78273	0.112283	0.680167	NPHP1	nephrocystin 1 [Source:HGNC Symbol;Acc:HGNC:7905]
ENSG00000148187	20.9603	25.3164	11.1714	14.3471	12.7308	13.593	16.3532	14.9542	17.7522	0.24745	0.11229	0.680167	MRRF	mitochondrial ribosome recycling factor [Source:HGNC Symbol;Acc:HGNC:7234]
ENSG00000146433	20.0075	8.43881	13.0333	10.7603	27.5834	19.0303	16.4756	20.2081	12.7431	-0.665213	0.112316	0.680167	TMEM181	transmembrane protein 181 [Source:HGNC Symbol;Acc:HGNC:20958]
ENSG00000189366	0.952739	2.41109	0	5.38017	5.3045	12.6868	4.45589	2.08575	6.82603	1.71048	0.112436	0.680167	ALG1L	ALG1 chitobiosyldiphosphodolichol beta-mannosyltransferase like [Source:HGNC Symbol;Acc:HGNC:33721]
ENSG00000116703	5.71643	10.8499	0.930953	13.4504	3.1827	7.24963	6.89667	3.2767	10.5166	1.68236	0.112468	0.680167	PDC	phosducin [Source:HGNC Symbol;Acc:HGNC:8759]
ENSG00000125977	30.4876	22.9053	33.5143	20.624	26.5225	23.5613	26.2692	30.1748	22.3635	-0.432197	0.112546	0.680167	EIF2S2	eukaryotic translation initiation factor 2 subunit beta [Source:HGNC Symbol;Acc:HGNC:3266]
ENSG00000132692	3.81096	7.23327	0.930953	1.79339	0	1.81241	2.59683	1.58064	3.61302	1.1927	0.112736	0.680167	BCAN	brevican [Source:HGNC Symbol;Acc:HGNC:23059]
ENSG00000170837	6.66917	0	5.58572	1.79339	13.7917	0	4.64	8.6822	0.597797	-3.86033	0.112748	0.680167	GPR27	G protein-coupled receptor 27 [Source:HGNC Symbol;Acc:HGNC:4482]
ENSG00000103064	41.9205	53.044	50.2715	52.905	62.5931	68.8714	54.9343	51.595	58.2735	0.175607	0.113041	0.680167	SLC7A6	solute carrier family 7 member 6 [Source:HGNC Symbol;Acc:HGNC:11064]
ENSG00000254662	197.217	207.354	174.088	198.17	215.363	222.926	202.52	195.556	209.483	0.0992517	0.113163	0.680167	AP000781.1	novel transcript
ENSG00000226312	524.959	309.825	468.269	396.339	672.611	335.295	451.216	555.28	347.153	-0.677643	0.113186	0.680167	CFLAR-AS1	CFLAR antisense RNA 1 [Source:HGNC Symbol;Acc:HGNC:14437]
ENSG00000183666	10.4801	2.41109	6.51667	4.48347	4.2436	0	4.68916	7.08013	2.29819	-1.62328	0.113295	0.680167	GUSBP1	GUSB pseudogene 1 [Source:HGNC Symbol;Acc:HGNC:13670]
ENSG00000113319	0.952739	2.41109	4.65477	7.17356	1.0609	6.34342	3.76608	2.2228	5.30936	1.25616	0.113607	0.680167	RASGRF2	Ras protein specific guanine nucleotide releasing factor 2 [Source:HGNC Symbol;Acc:HGNC:9876]
ENSG00000165972	7.62191	7.23327	7.44762	6.27686	6.3654	4.53102	6.57935	7.14498	6.01372	-0.248673	0.113627	0.680167	CCDC38	coiled-coil domain containing 38 [Source:HGNC Symbol;Acc:HGNC:26843]
ENSG00000143476	31.4404	51.8384	31.6524	78.0125	29.7052	43.4978	44.3578	30.9327	57.7829	0.90151	0.114063	0.680167	DTL	denticleless E3 ubiquitin protein ligase homolog [Source:HGNC Symbol;Acc:HGNC:30288]
ENSG00000258875	2.85822	1.20554	1.86191	0.896695	5.3045	1.81241	2.32321	3.34154	1.30488	-1.35659	0.114152	0.680167	AL135818.1	novel transcript, antisense to GPR68
ENSG00000106565	2.85822	6.02772	0.930953	2.69008	1.0609	1.81241	2.56338	1.61669	3.51007	1.11846	0.114155	0.680167	TMEM176B	transmembrane protein 176B [Source:HGNC Symbol;Acc:HGNC:29596]
ENSG00000148291	10.4801	4.82218	11.1714	0.896695	10.609	8.15583	7.68921	10.7535	4.6249	-1.21732	0.114181	0.680167	SURF2	surfeit 2 [Source:HGNC Symbol;Acc:HGNC:11475]
ENSG00000220925	33.3459	67.5105	62.3739	87.8761	42.436	48.935	57.0796	46.0519	68.1072	0.564546	0.114197	0.680167	IGBP1-AS2	IGBP1 antisense RNA 2 [Source:HGNC Symbol;Acc:HGNC:40294]
ENSG00000260381	76.2191	81.977	87.5096	97.7397	59.4104	80.6521	80.5847	74.3797	86.7896	0.222613	0.114344	0.680167	AC007610.3	novel transcript, antisense to HEATR3
ENSG00000264269	32.3931	26.522	47.4786	24.2108	32.8879	20.8427	30.7225	37.5866	23.8585	-0.655715	0.114441	0.680167	AC016866.1	novel transcript, antisense to DYM
ENSG00000162927	17.1493	13.261	19.55	18.8306	14.8526	11.7806	15.904	17.184	14.6241	-0.232719	0.114526	0.680167	PUS10	pseudouridine synthase 10 [Source:HGNC Symbol;Acc:HGNC:26505]
ENSG00000124813	20.9603	32.5497	30.7215	34.0744	20.1571	25.3737	27.3061	23.9463	30.6659	0.356836	0.114531	0.680167	RUNX2	RUNX family transcription factor 2 [Source:HGNC Symbol;Acc:HGNC:10472]
ENSG00000154548	13.3383	8.43881	15.8262	10.7603	20.1571	6.34342	12.4774	16.4406	8.51419	-0.949318	0.114702	0.680167	SRSF12	serine and arginine rich splicing factor 12 [Source:HGNC Symbol;Acc:HGNC:21220]
ENSG00000234118	63.8335	34.9608	60.5119	43.0414	110.334	48.0288	60.1183	78.2264	42.0103	-0.896912	0.114727	0.680167	RPL13AP6	ribosomal protein L13a pseudogene 6 [Source:HGNC Symbol;Acc:HGNC:23737]
ENSG00000086619	10.4801	9.64436	18.6191	14.3471	12.7308	8.15583	12.3296	13.9433	10.7158	-0.37984	0.114749	0.680167	ERO1B	endoplasmic reticulum oxidoreductase 1 beta [Source:HGNC Symbol;Acc:HGNC:14355]
ENSG00000228672	5.71643	1.20554	3.72381	2.69008	13.7917	8.15583	5.88057	7.74399	4.01715	-0.946903	0.11483	0.680167	PROB1	proline rich basic protein 1 [Source:HGNC Symbol;Acc:HGNC:41906]
ENSG00000170458	2.85822	0	2.79286	1.79339	1.0609	0	1.41756	2.23733	0.597797	-1.90405	0.114903	0.680167	CD14	CD14 molecule [Source:HGNC Symbol;Acc:HGNC:1628]
ENSG00000159496	261.051	197.709	250.426	232.244	270.53	241.956	242.319	260.669	223.97	-0.218914	0.115035	0.680167	RGL4	ral guanine nucleotide dissociation stimulator like 4 [Source:HGNC Symbol;Acc:HGNC:31911]
ENSG00000198736	0.952739	0	2.79286	0	1.0609	0	0.801083	1.60217	0	NA	0.11505	0.680167	MSRB1	methionine sulfoxide reductase B1 [Source:HGNC Symbol;Acc:HGNC:14133]
ENSG00000211897	0	4.82218	0	3.58678	0	0.906203	1.55253	0	3.10505	NA	0.115121	0.680167	IGHG3	immunoglobulin heavy constant gamma 3 (G3m marker) [Source:HGNC Symbol;Acc:HGNC:5527]
ENSG00000248641	33.3459	19.2887	48.4096	30.4876	35.0097	31.7171	33.0431	38.9217	27.1645	-0.518854	0.115139	0.680167	HMGA1P2	high mobility group AT-hook 1 pseudogene 2 [Source:HGNC Symbol;Acc:HGNC:13322]
ENSG00000279735	11.4329	8.43881	6.51667	0	6.3654	4.53102	6.21413	8.10498	4.32328	-0.906684	0.115144	0.680167	AC124312.4	TEC
ENSG00000197969	25.724	19.2887	52.1334	34.0744	48.8014	19.0303	33.1754	42.2196	24.1311	-0.807017	0.115216	0.680167	VPS13A	vacuolar protein sorting 13 homolog A [Source:HGNC Symbol;Acc:HGNC:1908]
ENSG00000077684	12.3856	7.23327	4.65477	2.69008	16.9744	8.15583	8.68233	11.3383	6.02639	-0.911833	0.115401	0.680167	JADE1	jade family PHD finger 1 [Source:HGNC Symbol;Acc:HGNC:30027]
ENSG00000261253	6.66917	2.41109	2.79286	1.79339	6.3654	0.906203	3.48969	5.27581	1.70356	-1.63084	0.115493	0.680167	AC137932.2	uncharacterized LOC100287036 [Source:NCBI gene;Acc:100287036]
ENSG00000242173	8.57465	12.0554	3.72381	17.9339	23.3398	30.8109	16.0731	11.8794	20.2667	0.770649	0.115669	0.680167	ARHGDIG	Rho GDP dissociation inhibitor gamma [Source:HGNC Symbol;Acc:HGNC:680]
ENSG00000164647	3.81096	2.41109	4.65477	0.896695	6.3654	0	3.02315	4.94371	1.10259	-2.16469	0.115688	0.680167	STEAP1	STEAP family member 1 [Source:HGNC Symbol;Acc:HGNC:11378]
ENSG00000171872	4.7637	2.41109	6.51667	1.79339	2.1218	0.906203	3.08548	4.46739	1.70356	-1.39088	0.115951	0.680167	KLF17	Kruppel like factor 17 [Source:HGNC Symbol;Acc:HGNC:18830]
ENSG00000257551	10.4801	8.43881	6.51667	1.79339	15.9135	7.24963	8.39869	10.9701	5.82728	-0.912684	0.116014	0.680167	HLX-AS1	HLX antisense RNA 1 [Source:HGNC Symbol;Acc:HGNC:42509]
ENSG00000171847	39.0623	53.044	68.8905	100.43	32.8879	91.5265	64.3068	46.9469	81.6668	0.798719	0.116088	0.680167	FAM90A1	family with sequence similarity 90 member A1 [Source:HGNC Symbol;Acc:HGNC:25526]
ENSG00000189280	0	4.82218	0	1.79339	1.0609	2.71861	1.73251	0.353634	3.11139	3.13723	0.116321	0.680167	GJB5	gap junction protein beta 5 [Source:HGNC Symbol;Acc:HGNC:4287]
ENSG00000248734	121.951	195.298	134.988	167.682	129.43	150.43	149.963	128.79	171.137	0.410133	0.116346	0.680167	AC008906.1	novel transcript
ENSG00000270016	8.57465	7.23327	6.51667	2.69008	9.54811	8.15583	7.11977	8.21314	6.02639	-0.44664	0.116552	0.680167	AC026150.4	novel transcript, antisense to AC026150.11
ENSG00000166800	8.57465	7.23327	18.6191	12.5537	11.6699	8.15583	11.1344	12.9545	9.31427	-0.475943	0.116554	0.680167	LDHAL6A	lactate dehydrogenase A like 6A [Source:HGNC Symbol;Acc:HGNC:28335]
ENSG00000265441	3.81096	1.20554	4.65477	0	1.0609	0	1.78869	3.17554	0.401848	-2.98228	0.116684	0.680167	NA	NA
ENSG00000189129	13.3383	12.0554	8.37858	5.38017	19.0962	13.593	11.9736	13.6044	10.3429	-0.395432	0.116914	0.680167	PLAC9	placenta associated 9 [Source:HGNC Symbol;Acc:HGNC:19255]
ENSG00000102245	0	4.82218	6.51667	11.657	0	0.906203	3.98368	2.17222	5.79514	1.41567	0.116957	0.680167	CD40LG	CD40 ligand [Source:HGNC Symbol;Acc:HGNC:11935]
ENSG00000232472	10.4801	0	14.8952	9.86364	12.7308	9.96823	9.65634	12.7021	6.61063	-0.942204	0.117035	0.680167	EEF1B2P3	eukaryotic translation elongation factor 1 beta 2 pseudogene 3 [Source:HGNC Symbol;Acc:HGNC:3210]
ENSG00000148834	5.71643	2.41109	4.65477	1.79339	9.54811	0.906203	4.17166	6.63977	1.70356	-1.96258	0.117197	0.680167	GSTO1	glutathione S-transferase omega 1 [Source:HGNC Symbol;Acc:HGNC:13312]
ENSG00000128739	0.952739	0	3.72381	0.896695	1.0609	0	1.10569	1.91248	0.298898	-2.67772	0.117341	0.680167	SNRPN	small nuclear ribonucleoprotein polypeptide N [Source:HGNC Symbol;Acc:HGNC:11164]
ENSG00000103544	17.1493	8.43881	16.7572	15.2438	13.7917	6.34342	12.954	15.8994	10.0087	-0.667719	0.117408	0.680167	VPS35L	VPS35 endosomal protein sorting factor like [Source:HGNC Symbol;Acc:HGNC:24641]
ENSG00000233825	42.8733	31.3442	39.1	35.8678	41.3751	24.4675	35.838	41.1161	30.5598	-0.428069	0.117478	0.680167	AL391839.2	novel transcript, antisense to EPC1
ENSG00000264186	1.90548	1.20554	0.930953	0	3.1827	0.906203	1.35515	2.00638	0.703916	-1.51112	0.117796	0.680167	SNRPCP4	small nuclear ribonucleoprotein polypeptide C pseudogene 4 [Source:HGNC Symbol;Acc:HGNC:49819]
ENSG00000106009	16.1966	8.43881	5.58572	2.69008	16.9744	3.62481	8.9184	12.9189	4.9179	-1.39337	0.117834	0.680167	BRAT1	BRCA1 associated ATM activator 1 [Source:HGNC Symbol;Acc:HGNC:21701]
ENSG00000205476	314.404	272.453	326.765	251.971	344.793	328.046	306.405	328.654	284.157	-0.209882	0.117925	0.680167	CCDC85C	coiled-coil domain containing 85C [Source:HGNC Symbol;Acc:HGNC:35459]
ENSG00000225670	313.451	266.425	460.822	281.562	518.781	264.611	350.942	431.018	270.866	-0.670167	0.118161	0.680167	CADM3-AS1	CADM3 antisense RNA 1 [Source:HGNC Symbol;Acc:HGNC:40812]
ENSG00000000005	2.85822	0	1.86191	0.896695	1.0609	0	1.11295	1.92701	0.298898	-2.68864	0.11818	0.680167	TNMD	tenomodulin [Source:HGNC Symbol;Acc:HGNC:17757]
ENSG00000140297	20.0075	34.9608	25.1357	43.938	14.8526	18.1241	26.1698	19.9986	32.341	0.693462	0.118276	0.680167	GCNT3	glucosaminyl (N-acetyl) transferase 3, mucin type [Source:HGNC Symbol;Acc:HGNC:4205]
ENSG00000172955	6.66917	10.8499	19.55	30.4876	12.7308	16.3117	16.0999	12.9833	19.2164	0.565677	0.118313	0.680167	ADH6	alcohol dehydrogenase 6 (class V) [Source:HGNC Symbol;Acc:HGNC:255]
ENSG00000106113	7.62191	9.64436	2.79286	10.7603	4.2436	8.15583	7.20315	4.88612	9.52017	0.962297	0.118331	0.680167	CRHR2	corticotropin releasing hormone receptor 2 [Source:HGNC Symbol;Acc:HGNC:2358]
ENSG00000186907	0.952739	4.82218	2.79286	4.48347	0	7.24963	3.38348	1.24853	5.51843	2.14402	0.118487	0.680167	RTN4RL2	reticulon 4 receptor like 2 [Source:HGNC Symbol;Acc:HGNC:23053]
ENSG00000104689	0	3.61663	0	1.79339	0	0.906203	1.0527	0	2.10541	NA	0.118592	0.680167	TNFRSF10A	TNF receptor superfamily member 10a [Source:HGNC Symbol;Acc:HGNC:11904]
ENSG00000245864	143.864	178.421	144.298	186.513	136.856	144.086	155.673	141.673	169.673	0.260198	0.118726	0.680167	MEF2C-AS2	MEF2C antisense RNA 2 [Source:HGNC Symbol;Acc:HGNC:53115]
ENSG00000120837	2.85822	7.23327	1.86191	7.17356	0	0.906203	3.33886	1.57337	5.10434	1.69786	0.118871	0.680167	NFYB	nuclear transcription factor Y subunit beta [Source:HGNC Symbol;Acc:HGNC:7805]
ENSG00000189362	1.90548	6.02772	1.86191	2.69008	1.0609	3.62481	2.86182	1.60943	4.11421	1.35407	0.119048	0.680167	NEMP2	nuclear envelope integral membrane protein 2 [Source:HGNC Symbol;Acc:HGNC:33700]
ENSG00000266933	0.952739	2.41109	1.86191	6.27686	1.0609	2.71861	2.54702	1.29185	3.80219	1.55739	0.119164	0.680167	AC005775.1	novel transcript, antisense to MADCAM1 and TPGS1
ENSG00000116809	33.3459	16.8776	36.3072	20.624	25.4616	22.6551	25.8786	31.7049	20.0522	-0.660943	0.119177	0.680167	ZBTB17	zinc finger and BTB domain containing 17 [Source:HGNC Symbol;Acc:HGNC:12936]
ENSG00000257198	3.81096	6.02772	1.86191	6.27686	1.0609	9.96823	4.83443	2.24459	7.42427	1.7258	0.1192	0.680167	FAM205BP	family with sequence similarity 205 member B, pseudogene [Source:HGNC Symbol;Acc:HGNC:24504]
ENSG00000099364	7.62191	6.02772	9.30953	3.58678	8.48721	0	5.83886	8.47288	3.20483	-1.4026	0.119231	0.680167	FBXL19	F-box and leucine rich repeat protein 19 [Source:HGNC Symbol;Acc:HGNC:25300]
ENSG00000148737	6.66917	0	5.58572	0.896695	2.1218	0.906203	2.6966	4.79223	0.600966	-2.99534	0.119286	0.680167	TCF7L2	transcription factor 7 like 2 [Source:HGNC Symbol;Acc:HGNC:11641]
ENSG00000100197	97.1794	74.7438	74.4762	55.5951	88.0548	84.2769	79.0544	86.5701	71.5386	-0.275148	0.119403	0.680167	CYP2D6	cytochrome P450 family 2 subfamily D member 6 [Source:HGNC Symbol;Acc:HGNC:2625]
ENSG00000115641	1.90548	1.20554	2.79286	0	3.1827	1.81241	1.8165	2.62701	1.00598	-1.38482	0.119477	0.680167	FHL2	four and a half LIM domains 2 [Source:HGNC Symbol;Acc:HGNC:3703]
ENSG00000104221	5.71643	7.23327	0.930953	3.58678	4.2436	9.96823	5.27988	3.63033	6.92943	0.932635	0.119595	0.680167	BRF2	BRF2 RNA polymerase III transcription initiation factor subunit [Source:HGNC Symbol;Acc:HGNC:17298]
ENSG00000167216	18.102	20.4943	22.3429	32.281	12.7308	26.2799	22.0385	17.7252	26.3517	0.572092	0.119666	0.680167	KATNAL2	katanin catalytic subunit A1 like 2 [Source:HGNC Symbol;Acc:HGNC:25387]
ENSG00000088038	9.52739	0	5.58572	3.58678	12.7308	0.906203	5.38948	9.28131	1.49766	-2.63162	0.119781	0.680167	CNOT3	CCR4-NOT transcription complex subunit 3 [Source:HGNC Symbol;Acc:HGNC:7879]
ENSG00000196655	9.52739	16.8776	14.8952	16.1405	12.7308	19.9365	15.018	12.3845	17.6515	0.51126	0.120111	0.680167	TRAPPC4	trafficking protein particle complex 4 [Source:HGNC Symbol;Acc:HGNC:19943]
ENSG00000100592	14.2911	9.64436	5.58572	0	6.3654	5.43722	6.8873	8.7474	5.02719	-0.799102	0.120314	0.680167	DAAM1	dishevelled associated activator of morphogenesis 1 [Source:HGNC Symbol;Acc:HGNC:18142]
ENSG00000214189	93.3684	85.5937	76.3382	67.2521	90.1766	66.1528	79.8136	86.6277	72.9995	-0.246941	0.120392	0.680167	ZNF788P	zinc finger family member 788, pseudogene [Source:HGNC Symbol;Acc:HGNC:33112]
ENSG00000112031	5.71643	25.3164	9.30953	12.5537	6.3654	22.6551	13.6528	7.13046	20.1751	1.50051	0.120557	0.680167	MTRF1L	mitochondrial translational release factor 1 like [Source:HGNC Symbol;Acc:HGNC:21051]
ENSG00000253125	224.846	88.0048	35.3762	3.58678	205.815	21.7489	96.563	155.346	37.7801	-2.03978	0.120589	0.680167	AC055854.1	novel transcript
ENSG00000231295	21.913	10.8499	9.30953	5.38017	7.42631	3.62481	9.75062	12.8829	6.61829	-0.960931	0.120712	0.680167	AC004888.1	novel transcript
ENSG00000108788	166.729	106.088	107.06	96.843	130.491	69.7776	112.831	134.76	90.9029	-0.567994	0.120973	0.680167	MLX	MAX dimerization protein MLX [Source:HGNC Symbol;Acc:HGNC:11645]
ENSG00000277449	88.6047	60.2772	101.474	16.1405	172.927	31.7171	78.5234	121.002	36.0449	-1.74716	0.120996	0.680167	CEBPB-AS1	CEBPB antisense RNA 1 [Source:HGNC Symbol;Acc:HGNC:51226]
ENSG00000229020	9.52739	6.02772	4.65477	3.58678	9.54811	8.15583	6.91677	7.91009	5.92344	-0.417258	0.121066	0.680167	AKR7A2P1	aldo-keto reductase family 7 member A2 pseudogene 1 [Source:HGNC Symbol;Acc:HGNC:24062]
ENSG00000120509	6.66917	9.64436	4.65477	6.27686	6.3654	12.6868	7.71623	5.89645	9.53602	0.693541	0.121087	0.680167	PDZD11	PDZ domain containing 11 [Source:HGNC Symbol;Acc:HGNC:28034]
ENSG00000169230	45.7315	14.4665	26.0667	0.896695	92.2984	11.7806	31.8734	54.6988	9.04796	-2.59585	0.12113	0.680167	PRELID1	PRELI domain containing 1 [Source:HGNC Symbol;Acc:HGNC:30255]
ENSG00000239614	9.52739	4.82218	7.44762	3.58678	5.3045	4.53102	5.86992	7.42651	4.31332	-0.783883	0.121138	0.680167	HMGN1P7	high mobility group nucleosome binding domain 1 pseudogene 7 [Source:HGNC Symbol;Acc:HGNC:39350]
ENSG00000213003	11.4329	7.23327	5.58572	3.58678	13.7917	5.43722	7.84459	10.2701	5.41909	-0.922328	0.121284	0.680167	BTF3P12	basic transcription factor 3 pseudogene 12 [Source:HGNC Symbol;Acc:HGNC:1127]
ENSG00000172757	50.4952	45.8107	55.8572	42.1447	83.8112	60.7156	56.4724	63.3878	49.557	-0.355118	0.121375	0.680167	CFL1	cofilin 1 [Source:HGNC Symbol;Acc:HGNC:1874]
ENSG00000213592	30.4876	6.02772	52.1334	34.0744	28.6443	24.4675	29.3058	37.0884	21.5232	-0.785077	0.121537	0.680167	PPIAP42	peptidylprolyl isomerase A pseudogene 42 [Source:HGNC Symbol;Acc:HGNC:53666]
ENSG00000225177	2.85822	0	0.930953	0	1.0609	0	0.808345	1.61669	0	NA	0.121571	0.680167	AL590617.2	novel transcript
ENSG00000089335	4.7637	1.20554	5.58572	0	1.0609	0	2.10264	3.80344	0.401848	-3.24258	0.121579	0.680167	ZNF302	zinc finger protein 302 [Source:HGNC Symbol;Acc:HGNC:13848]
ENSG00000164929	2.85822	1.20554	5.58572	0	3.1827	0.906203	2.28973	3.87555	0.703916	-2.46092	0.121631	0.680167	BAALC	BAALC binder of MAP3K1 and KLF4 [Source:HGNC Symbol;Acc:HGNC:14333]
ENSG00000265496	3737.6	5645.57	3475.25	5776.51	3282.43	3656.53	4262.31	3498.42	5026.2	0.522763	0.121643	0.680167	AC100778.3	microRNA 1539
ENSG00000108828	3.81096	4.82218	0.930953	4.48347	2.1218	3.62481	3.29903	2.2879	4.31016	0.913713	0.121646	0.680167	VAT1	vesicle amine transport 1 [Source:HGNC Symbol;Acc:HGNC:16919]
ENSG00000266396	25.724	15.6721	18.6191	16.1405	14.8526	9.96823	16.8294	19.7319	13.9269	-0.50265	0.121675	0.680167	MIR4273	microRNA 4273 [Source:HGNC Symbol;Acc:HGNC:38339]
ENSG00000164048	27.6294	30.1386	42.8238	50.2149	26.5225	38.9667	36.0493	32.3253	39.7734	0.299142	0.121784	0.680167	ZNF589	zinc finger protein 589 [Source:HGNC Symbol;Acc:HGNC:16747]
ENSG00000273466	4.7637	6.02772	6.51667	14.3471	4.2436	10.8744	7.79554	5.17466	10.4164	1.00933	0.121813	0.680167	AC012510.1	novel transcript, antisense to PLCD4
ENSG00000158552	3.81096	4.82218	0	6.27686	4.2436	9.96823	4.85364	2.68485	7.02243	1.38713	0.121842	0.680167	ZFAND2B	zinc finger AN1-type containing 2B [Source:HGNC Symbol;Acc:HGNC:25206]
ENSG00000280195	2720.07	4339.96	3032.11	3444.2	2867.61	3629.34	3338.88	2873.27	3804.5	0.405016	0.121904	0.680167	AC245140.2	novel transcript, antisense to RPL10
ENSG00000204194	2.85822	3.61663	1.86191	5.38017	5.3045	7.24963	4.37851	3.34154	5.41548	0.696574	0.121952	0.680167	RPL12P1	ribosomal protein L12 pseudogene 1 [Source:HGNC Symbol;Acc:HGNC:13976]
ENSG00000100889	7.62191	1.20554	4.65477	3.58678	8.48721	3.62481	4.8635	6.92129	2.80571	-1.30267	0.122244	0.680167	PCK2	phosphoenolpyruvate carboxykinase 2, mitochondrial [Source:HGNC Symbol;Acc:HGNC:8725]
ENSG00000198466	20.0075	24.1109	19.55	21.5207	11.6699	12.6868	18.2576	17.0758	19.4395	0.187035	0.122268	0.680167	ZNF587	zinc finger protein 587 [Source:HGNC Symbol;Acc:HGNC:30955]
ENSG00000225828	0.952739	0	0.930953	0	1.0609	0.906203	0.641799	0.981531	0.302068	-1.70016	0.122406	0.680167	FAM229A	family with sequence similarity 229 member A [Source:HGNC Symbol;Acc:HGNC:44652]
ENSG00000256007	956.55	347.197	512.955	394.546	1120.31	382.418	618.996	863.272	374.72	-1.204	0.122449	0.680167	ARAP1-AS1	ARAP1 antisense RNA 1 [Source:HGNC Symbol;Acc:HGNC:39993]
ENSG00000268938	139.1	120.554	161.055	110.293	225.972	209.333	161.051	175.376	146.727	-0.257314	0.122478	0.680167	AC005387.1	novel transcript, antisense to FKBP8
ENSG00000168884	3.81096	0	1.86191	0	9.54811	1.81241	2.8389	5.07366	0.604135	-3.07008	0.122505	0.680167	TNIP2	TNFAIP3 interacting protein 2 [Source:HGNC Symbol;Acc:HGNC:19118]
ENSG00000173846	1.90548	1.20554	0.930953	0	1.0609	0.906203	1.00151	1.29911	0.703916	-0.884049	0.122596	0.680167	PLK3	polo like kinase 3 [Source:HGNC Symbol;Acc:HGNC:2154]
ENSG00000235109	3.81096	4.82218	0.930953	5.38017	2.1218	8.15583	4.20365	2.2879	6.11939	1.41936	0.122746	0.680167	ZSCAN31	zinc finger and SCAN domain containing 31 [Source:HGNC Symbol;Acc:HGNC:14097]
ENSG00000175718	0.952739	6.02772	6.51667	8.07025	0	8.15583	4.95387	2.4898	7.41793	1.57499	0.1228	0.680167	RBMXL3	RBMX like 3 [Source:HGNC Symbol;Acc:HGNC:26859]
ENSG00000105699	9.52739	10.8499	17.6881	17.9339	19.0962	19.9365	15.8387	15.4372	16.2401	0.0731449	0.12323	0.680167	LSR	lipolysis stimulated lipoprotein receptor [Source:HGNC Symbol;Acc:HGNC:29572]
ENSG00000280233	0.952739	0	1.86191	0.896695	1.0609	0.906203	0.946407	1.29185	0.600966	-1.10408	0.12335	0.680167	AC015813.7	novel transcript
ENSG00000164169	4.7637	3.61663	4.65477	0	8.48721	1.81241	3.88912	5.96856	1.80968	-1.72165	0.123463	0.680167	PRMT9	protein arginine methyltransferase 9 [Source:HGNC Symbol;Acc:HGNC:25099]
ENSG00000175287	0	1.20554	2.79286	6.27686	4.2436	5.43722	3.32601	2.34549	4.30654	0.876642	0.123467	0.680167	PHYHD1	phytanoyl-CoA dioxygenase domain containing 1 [Source:HGNC Symbol;Acc:HGNC:23396]
ENSG00000166188	4.7637	0	10.2405	3.58678	19.0962	2.71861	6.7343	11.3668	2.1018	-2.43513	0.123483	0.680167	ZNF319	zinc finger protein 319 [Source:HGNC Symbol;Acc:HGNC:13644]
ENSG00000264672	545.919	1052.44	232.738	315.637	317.209	695.964	526.651	365.289	688.014	0.913399	0.123698	0.680167	SEPTIN4-AS1	SEPT4 antisense RNA 1 [Source:HGNC Symbol;Acc:HGNC:51345]
ENSG00000123146	9.52739	0	10.2405	7.17356	5.3045	1.81241	5.67639	8.35746	2.99532	-1.48035	0.123868	0.680167	ADGRE5	adhesion G protein-coupled receptor E5 [Source:HGNC Symbol;Acc:HGNC:1711]
ENSG00000072315	1.90548	3.61663	0	0.896695	0	3.62481	1.67394	0.635159	2.71271	2.09455	0.123932	0.680167	TRPC5	transient receptor potential cation channel subfamily C member 5 [Source:HGNC Symbol;Acc:HGNC:12337]
ENSG00000224081	11.4329	24.1109	13.0333	15.2438	9.54811	18.1241	15.2488	11.3381	19.1596	0.756887	0.124007	0.680167	SLC44A3-AS1	SLC44A3 antisense RNA 1 [Source:HGNC Symbol;Acc:HGNC:49057]
ENSG00000105856	19.0548	26.522	13.0333	32.281	15.9135	21.7489	21.4256	16.0005	26.8506	0.746835	0.124047	0.680167	HBP1	HMG-box transcription factor 1 [Source:HGNC Symbol;Acc:HGNC:23200]
ENSG00000224595	0	1.20554	1.86191	7.17356	0	2.71861	2.15994	0.620635	3.69924	2.57541	0.12406	0.680167	AC073626.1	novel transcript
ENSG00000232037	21.913	26.522	36.3072	48.4215	23.3398	45.3102	33.6356	27.1867	40.0846	0.560147	0.12423	0.680167	AL590556.1	ribosomal protein L21 (RPL21) pseudogene
ENSG00000144567	58.1171	73.5382	40.9619	52.905	32.8879	35.3419	48.9587	43.989	53.9284	0.293903	0.124285	0.680167	RETREG2	reticulophagy regulator family member 2 [Source:HGNC Symbol;Acc:HGNC:28450]
ENSG00000053372	2.85822	0	3.72381	2.69008	6.3654	5.43722	3.51246	4.31581	2.7091	-0.671818	0.124315	0.680167	MRTO4	MRT4 homolog, ribosome maturation factor [Source:HGNC Symbol;Acc:HGNC:18477]
ENSG00000132781	19.0548	24.1109	12.1024	26.0042	12.7308	17.2179	18.5368	14.6293	22.4443	0.617486	0.124354	0.680167	MUTYH	mutY DNA glycosylase [Source:HGNC Symbol;Acc:HGNC:7527]
ENSG00000163319	52.4006	74.7438	64.2358	85.186	50.9232	54.3722	63.6436	55.8532	71.434	0.35497	0.124447	0.680167	MRPS18C	mitochondrial ribosomal protein S18C [Source:HGNC Symbol;Acc:HGNC:16633]
ENSG00000230615	1.90548	2.41109	2.79286	4.48347	0	2.71861	2.38525	1.56611	3.20439	1.03286	0.124498	0.680167	AL139220.2	novel transcript
ENSG00000243498	6.66917	6.02772	4.65477	0.896695	5.3045	2.71861	4.37858	5.54281	3.21434	-0.786095	0.124523	0.680167	UBA52P5	ubiquitin A-52 residue ribosomal protein fusion product 1 pseudogene 5 [Source:HGNC Symbol;Acc:HGNC:36993]
ENSG00000177370	9.52739	2.41109	13.9643	10.7603	6.3654	4.53102	7.92659	9.95236	5.90081	-0.754125	0.124672	0.680167	TIMM22	translocase of inner mitochondrial membrane 22 [Source:HGNC Symbol;Acc:HGNC:17317]
ENSG00000256552	10.4801	1.20554	3.72381	1.79339	14.8526	2.71861	5.79568	9.68552	1.90585	-2.3454	0.124679	0.680167	AC092745.2	ribosomal protein S24 (RPS24) pseudogene
ENSG00000236498	783.152	1104.28	833.203	980.087	660.941	742.18	850.64	759.099	942.182	0.311719	0.124851	0.680167	AC107081.2	novel transcript
ENSG00000214223	18.102	8.43881	7.44762	5.38017	10.609	5.43722	9.23581	12.0529	6.41873	-0.909019	0.125057	0.680167	HNRNPA1P10	heterogeneous nuclear ribonucleoprotein A1 pseudogene 10 [Source:HGNC Symbol;Acc:HGNC:39128]
ENSG00000273013	86.6993	80.7715	83.7858	59.1819	80.6285	68.8714	76.6564	83.7045	69.6083	-0.266047	0.12507	0.680167	AC117490.2	novel transcript, antisense to RNF168
ENSG00000101365	2.85822	7.23327	8.37858	10.7603	3.1827	12.6868	7.51666	4.8065	10.2268	1.0893	0.125082	0.680167	IDH3B	isocitrate dehydrogenase (NAD(+)) 3 non-catalytic subunit beta [Source:HGNC Symbol;Acc:HGNC:5385]
ENSG00000164068	109.565	77.1549	61.4429	56.4918	97.6029	70.6838	78.8235	89.5369	68.1102	-0.394613	0.12515	0.680167	RNF123	ring finger protein 123 [Source:HGNC Symbol;Acc:HGNC:21148]
ENSG00000127419	10.4801	6.02772	0.930953	0	4.2436	1.81241	3.9158	5.21823	2.61338	-0.997645	0.125233	0.680167	TMEM175	transmembrane protein 175 [Source:HGNC Symbol;Acc:HGNC:28709]
ENSG00000228630	3.81096	2.41109	6.51667	2.69008	2.1218	0.906203	3.07613	4.14981	2.00246	-1.05127	0.125291	0.680167	HOTAIR	HOX transcript antisense RNA [Source:HGNC Symbol;Acc:HGNC:33510]
ENSG00000167671	10.4801	8.43881	8.37858	6.27686	10.609	4.53102	8.11907	9.82257	6.41556	-0.614525	0.125413	0.680167	UBXN6	UBX domain protein 6 [Source:HGNC Symbol;Acc:HGNC:14928]
ENSG00000153187	29.5349	20.4943	22.3429	20.624	37.1315	31.7171	26.9741	29.6698	24.2784	-0.289317	0.125427	0.680167	HNRNPU	heterogeneous nuclear ribonucleoprotein U [Source:HGNC Symbol;Acc:HGNC:5048]
ENSG00000267374	0	2.41109	0	0.896695	1.0609	1.81241	1.03018	0.353634	1.70673	2.27091	0.125497	0.680167	MIR924HG	MIR924 host gene [Source:HGNC Symbol;Acc:HGNC:44332]
ENSG00000235602	105.754	14.4665	60.5119	26.9008	91.2375	62.528	60.2331	85.8345	34.6318	-1.30946	0.125617	0.680167	POU5F1P3	POU class 5 homeobox 1 pseudogene 3 [Source:HGNC Symbol;Acc:HGNC:9222]
ENSG00000129055	69.55	34.9608	51.2024	39.4546	86.9939	75.2149	59.5627	69.2487	49.8767	-0.473421	0.125803	0.680167	ANAPC13	anaphase promoting complex subunit 13 [Source:HGNC Symbol;Acc:HGNC:24540]
ENSG00000170085	2.85822	1.20554	2.79286	1.79339	2.1218	1.81241	2.09737	2.59096	1.60378	-0.69201	0.125853	0.680167	SIMC1	SUMO interacting motifs containing 1 [Source:HGNC Symbol;Acc:HGNC:24779]
ENSG00000248873	2.85822	1.20554	2.79286	1.79339	2.1218	1.81241	2.09737	2.59096	1.60378	-0.69201	0.125853	0.680167	SERBP1P6	SERPINE1 mRNA binding protein 1 pseudogene 6 [Source:HGNC Symbol;Acc:HGNC:44635]
ENSG00000228501	1.90548	1.20554	1.86191	0.896695	1.0609	0.906203	1.30612	1.60943	1.00281	-0.682494	0.126086	0.680167	RPL15P18	ribosomal protein L15 pseudogene 18 [Source:HGNC Symbol;Acc:HGNC:36515]
ENSG00000256683	5.71643	2.41109	3.72381	2.69008	2.1218	0.906203	2.92824	3.85402	2.00246	-0.94459	0.126247	0.680167	ZNF350	zinc finger protein 350 [Source:HGNC Symbol;Acc:HGNC:16656]
ENSG00000182446	6.66917	9.64436	3.72381	6.27686	3.1827	3.62481	5.52029	4.52523	6.51534	0.525851	0.126303	0.680167	NPLOC4	NPL4 homolog, ubiquitin recognition factor [Source:HGNC Symbol;Acc:HGNC:18261]
ENSG00000263923	25.724	44.6051	19.55	37.6612	11.6699	14.4993	25.6182	18.9813	32.2552	0.764953	0.126338	0.680167	AC019131.1	novel transcript, antisense to EIF4E
ENSG00000138767	0.952739	3.61663	0.930953	1.79339	0	4.53102	1.97079	0.627897	3.31368	2.39983	0.126627	0.680167	CNOT6L	CCR4-NOT transcription complex subunit 6 like [Source:HGNC Symbol;Acc:HGNC:18042]
ENSG00000112782	1.90548	0	2.79286	0	3.1827	2.71861	1.76661	2.62701	0.906203	-1.53552	0.126627	0.680167	CLIC5	chloride intracellular channel 5 [Source:HGNC Symbol;Acc:HGNC:13517]
ENSG00000153558	205.792	226.642	196.431	199.963	214.302	238.331	213.577	205.508	221.646	0.109058	0.126814	0.680167	FBXL2	F-box and leucine rich repeat protein 2 [Source:HGNC Symbol;Acc:HGNC:13598]
ENSG00000228544	57.1643	73.5382	50.2715	60.0786	78.5067	81.5583	66.8529	61.9808	71.725	0.210655	0.126816	0.680167	CCDC183-AS1	CCDC183 antisense RNA 1 [Source:HGNC Symbol;Acc:HGNC:44105]
ENSG00000229750	2.85822	0	5.58572	3.58678	3.1827	2.71861	2.98867	3.87555	2.1018	-0.882777	0.126862	0.680167	AC096649.2	novel transcript
ENSG00000186166	47.637	94.0325	57.7191	68.1488	33.9488	57.0908	59.7628	46.435	73.0907	0.654476	0.126999	0.680167	CCDC84	coiled-coil domain containing 84 [Source:HGNC Symbol;Acc:HGNC:30460]
ENSG00000166986	950.834	300.181	401.241	281.562	1128.8	324.421	564.506	826.958	302.055	-1.453	0.127057	0.680167	MARS1	methionyl-tRNA synthetase 1 [Source:HGNC Symbol;Acc:HGNC:6898]
ENSG00000223650	35.2513	37.3719	26.9976	35.8678	16.9744	29.9047	30.3946	26.4078	34.3815	0.380667	0.127173	0.680167	UHRF2P1	ubiquitin like with PHD and ring finger domains 2 pseudogene 1 [Source:HGNC Symbol;Acc:HGNC:39565]
ENSG00000172794	118.14	40.9885	38.1691	26.9008	98.6638	32.6233	59.2475	84.9908	33.5042	-1.34296	0.127246	0.680167	RAB37	RAB37, member RAS oncogene family [Source:HGNC Symbol;Acc:HGNC:30268]
ENSG00000207704	7.62191	7.23327	3.72381	1.79339	1.0609	0	3.57221	4.13554	3.00889	-0.458847	0.127565	0.680167	MIR548AA1	microRNA 548aa-1 [Source:HGNC Symbol;Acc:HGNC:38944]
ENSG00000154274	48.5897	38.5774	111.714	54.6984	109.273	73.4025	72.7092	89.8589	55.5594	-0.693631	0.127641	0.680167	C4orf19	chromosome 4 open reading frame 19 [Source:HGNC Symbol;Acc:HGNC:25618]
ENSG00000141519	1.90548	10.8499	13.0333	14.3471	0	7.24963	7.89758	4.97961	10.8155	1.119	0.127719	0.680167	CCDC40	coiled-coil domain containing 40 [Source:HGNC Symbol;Acc:HGNC:26090]
ENSG00000276043	1.90548	2.41109	5.58572	8.07025	3.1827	4.53102	4.28104	3.55797	5.00412	0.492063	0.127752	0.680167	UHRF1	ubiquitin like with PHD and ring finger domains 1 [Source:HGNC Symbol;Acc:HGNC:12556]
ENSG00000141905	0	2.41109	4.65477	5.38017	0	0.906203	2.22537	1.55159	2.89915	0.901886	0.127771	0.680167	NFIC	nuclear factor I C [Source:HGNC Symbol;Acc:HGNC:7786]
ENSG00000267121	23.8185	4.82218	11.1714	4.48347	40.3142	6.34342	15.1589	25.1014	5.21636	-2.26665	0.127873	0.680167	AC008105.3	novel transcript, antisense to FMNL1
ENSG00000087087	12.3856	9.64436	19.55	16.1405	12.7308	3.62481	12.346	14.8888	9.80323	-0.6029	0.128079	0.680167	SRRT	serrate, RNA effector molecule [Source:HGNC Symbol;Acc:HGNC:24101]
ENSG00000118518	18.102	6.02772	12.1024	8.96695	16.9744	11.7806	12.3257	15.7263	8.9251	-0.817237	0.128234	0.680167	RNF146	ring finger protein 146 [Source:HGNC Symbol;Acc:HGNC:21336]
ENSG00000224808	11.4329	15.6721	10.2405	21.5207	24.4007	45.3102	21.4295	15.358	27.501	0.84049	0.1285	0.680167	SRGAP3-AS1	SRGAP3 antisense RNA 1 [Source:HGNC Symbol;Acc:HGNC:40898]
ENSG00000177469	6.66917	8.43881	2.79286	9.86364	9.54811	12.6868	8.33324	6.33671	10.3298	0.705001	0.128501	0.680167	CAVIN1	caveolae associated protein 1 [Source:HGNC Symbol;Acc:HGNC:9688]
ENSG00000164306	4.7637	1.20554	3.72381	2.69008	3.1827	1.81241	2.89637	3.89007	1.90268	-1.03176	0.128659	0.680167	PRIMPOL	primase and DNA directed polymerase [Source:HGNC Symbol;Acc:HGNC:26575]
ENSG00000275185	7.62191	9.64436	1.86191	3.58678	4.2436	4.53102	5.24826	4.57581	5.92072	0.371746	0.128717	0.680167	AC130324.3	novel transcript, antisense to TEFM
ENSG00000005844	0.952739	3.61663	0.930953	8.96695	0	2.71861	2.86431	0.627897	5.10073	3.0221	0.12873	0.680167	ITGAL	integrin subunit alpha L [Source:HGNC Symbol;Acc:HGNC:6148]
ENSG00000126653	0	2.41109	0	4.48347	0	0.906203	1.30013	0	2.60026	NA	0.128981	0.680167	NSRP1	nuclear speckle splicing regulatory protein 1 [Source:HGNC Symbol;Acc:HGNC:25305]
ENSG00000144712	6501.49	9846.89	6964.46	10981.8	5407.41	5978.22	7613.38	6291.12	8935.64	0.506255	0.129021	0.680167	CAND2	cullin associated and neddylation dissociated 2 (putative) [Source:HGNC Symbol;Acc:HGNC:30689]
ENSG00000100307	1.90548	2.41109	0	3.58678	2.1218	5.43722	2.57706	1.34243	3.8117	1.50559	0.129023	0.680167	CBX7	chromobox 7 [Source:HGNC Symbol;Acc:HGNC:1557]
ENSG00000251423	4.7637	2.41109	6.51667	4.48347	8.48721	8.15583	5.80299	6.58919	5.0168	-0.393335	0.129063	0.680167	AC016576.1	novel transcript
ENSG00000274092	6.66917	3.61663	3.72381	1.79339	12.7308	5.43722	5.66184	7.70793	3.61575	-1.09205	0.129132	0.680167	AC106739.1	novel transcript, antisense to IL4R
ENSG00000165511	0	2.41109	0.930953	1.79339	1.0609	1.81241	1.33479	0.663951	2.00563	1.59491	0.129216	0.680167	C10orf25	chromosome 10 open reading frame 25 [Source:HGNC Symbol;Acc:HGNC:23509]
ENSG00000164933	4.7637	3.61663	4.65477	0.896695	3.1827	1.81241	3.15448	4.20039	2.10858	-0.994252	0.129333	0.680167	SLC25A32	solute carrier family 25 member 32 [Source:HGNC Symbol;Acc:HGNC:29683]
ENSG00000204706	9.52739	31.3442	18.6191	23.3141	5.3045	16.3117	17.4035	11.1503	23.6566	1.08516	0.129469	0.680167	MAMDC2-AS1	MAMDC2 antisense RNA 1 [Source:HGNC Symbol;Acc:HGNC:48719]
ENSG00000132561	15.2438	18.0832	19.55	22.4174	15.9135	24.4675	19.2792	16.9025	21.656	0.357535	0.129479	0.680167	MATN2	matrilin 2 [Source:HGNC Symbol;Acc:HGNC:6908]
ENSG00000169490	3.81096	1.20554	10.2405	2.69008	4.2436	1.81241	4.00051	6.09835	1.90268	-1.68039	0.129593	0.680167	TM2D2	TM2 domain containing 2 [Source:HGNC Symbol;Acc:HGNC:24127]
ENSG00000180776	0.952739	1.20554	2.79286	4.48347	0	1.81241	1.8745	1.24853	2.50048	1.00197	0.129623	0.680167	ZDHHC20	zinc finger DHHC-type containing 20 [Source:HGNC Symbol;Acc:HGNC:20749]
ENSG00000119922	0.952739	1.20554	1.86191	3.58678	0	1.81241	1.5699	0.938215	2.20158	1.23055	0.129848	0.680167	IFIT2	interferon induced protein with tetratricopeptide repeats 2 [Source:HGNC Symbol;Acc:HGNC:5409]
ENSG00000254294	0.952739	1.20554	1.86191	3.58678	0	1.81241	1.5699	0.938215	2.20158	1.23055	0.129848	0.680167	IMPDH1P6	inosine monophosphate dehydrogenase 1 pseudogene 6 [Source:HGNC Symbol;Acc:HGNC:33961]
ENSG00000206573	224.846	232.67	169.433	205.343	178.231	229.269	206.632	190.837	222.428	0.220994	0.130017	0.680167	THUMPD3-AS1	THUMPD3 antisense RNA 1 [Source:HGNC Symbol;Acc:HGNC:44478]
ENSG00000227591	1140.43	101.266	426.376	98.6364	1876.73	87.9017	621.89	1147.85	95.9346	-3.58073	0.130146	0.680167	HSD11B1-AS1	HSD11B1 antisense RNA 1 [Source:HGNC Symbol;Acc:HGNC:54053]
ENSG00000116641	1.90548	2.41109	1.86191	5.38017	0	3.62481	2.53058	1.25579	3.80536	1.59943	0.130153	0.680167	DOCK7	dedicator of cytokinesis 7 [Source:HGNC Symbol;Acc:HGNC:19190]
ENSG00000228703	382.048	208.559	277.424	126.434	780.823	293.61	344.816	480.098	209.534	-1.19614	0.130184	0.680167	AL355310.2	novel transcript
ENSG00000188343	38.1096	16.8776	29.7905	21.5207	28.6443	22.6551	26.2663	32.1815	20.3511	-0.661121	0.130261	0.680167	FAM92A	family with sequence similarity 92 member A [Source:HGNC Symbol;Acc:HGNC:30452]
ENSG00000225674	32.3931	19.2887	27.9286	10.7603	16.9744	14.4993	20.3074	25.7654	14.8494	-0.795026	0.13029	0.680167	IPO7P2	importin 7 pseudogene 2 [Source:HGNC Symbol;Acc:HGNC:39838]
ENSG00000230373	6.66917	1.20554	3.72381	1.79339	11.6699	9.96823	5.83834	7.3543	4.32239	-0.766759	0.130463	0.680167	GOLGA6L5P	golgin A6 family like 5, pseudogene [Source:HGNC Symbol;Acc:HGNC:30472]
ENSG00000064726	0.952739	1.20554	0	1.79339	0	1.81241	0.96068	0.31758	1.60378	2.33629	0.130534	0.680167	BTBD1	BTB domain containing 1 [Source:HGNC Symbol;Acc:HGNC:1120]
ENSG00000204351	4.7637	3.61663	7.44762	0.896695	12.7308	4.53102	5.66441	8.31404	3.01478	-1.4635	0.130634	0.680167	SKIV2L	Ski2 like RNA helicase [Source:HGNC Symbol;Acc:HGNC:10898]
ENSG00000154099	26.6767	30.1386	17.6881	27.7975	24.4007	42.5915	28.2155	22.9218	33.5092	0.547836	0.13079	0.680167	DNAAF1	dynein axonemal assembly factor 1 [Source:HGNC Symbol;Acc:HGNC:30539]
ENSG00000223949	16.1966	51.8384	21.4119	60.0786	13.7917	19.0303	30.3912	17.1334	43.6491	1.34914	0.130967	0.680167	ROR1-AS1	ROR1 antisense RNA 1 [Source:HGNC Symbol;Acc:HGNC:40508]
ENSG00000108175	12.3856	0	3.72381	1.79339	16.9744	2.71861	6.26597	11.0279	1.504	-2.87429	0.131018	0.680167	ZMIZ1	zinc finger MIZ-type containing 1 [Source:HGNC Symbol;Acc:HGNC:16493]
ENSG00000257497	2.85822	3.61663	0	2.69008	5.3045	6.34342	3.46881	2.72091	4.21671	0.632031	0.131123	0.680167	AC121761.1	novel transcript, antisense to GLIPR1
ENSG00000269091	81.9356	66.305	100.543	56.4918	74.2631	60.7156	73.3756	85.5805	61.1708	-0.48444	0.131239	0.680167	AC010624.3	novel transcript, antisense to ZNF473
ENSG00000270362	80.9828	122.966	92.1644	127.331	54.1059	59.8094	89.5598	75.751	103.369	0.44846	0.131243	0.680167	HMGN3-AS1	HMGN3 antisense RNA 1 [Source:HGNC Symbol;Acc:HGNC:48984]
ENSG00000205542	15.2438	13.261	9.30953	7.17356	11.6699	5.43722	10.3492	12.0744	8.62392	-0.485538	0.131387	0.680167	TMSB4X	thymosin beta 4 X-linked [Source:HGNC Symbol;Acc:HGNC:11881]
ENSG00000226054	0.952739	2.41109	2.79286	9.86364	0	3.62481	3.27419	1.24853	5.29985	2.08572	0.131387	0.680167	MEMO1P1	mediator of cell motility 1 pseudogene 1 [Source:HGNC Symbol;Acc:HGNC:23274]
ENSG00000110651	0	2.41109	0	0.896695	0	4.53102	1.30647	0	2.61293	NA	0.131392	0.680167	CD81	CD81 molecule [Source:HGNC Symbol;Acc:HGNC:1701]
ENSG00000228002	0	2.41109	0	0.896695	0	4.53102	1.30647	0	2.61293	NA	0.131392	0.680167	DHX9P1	DEAH-box helicase 9 pseudogene 1 [Source:HGNC Symbol;Acc:HGNC:2751]
ENSG00000254248	0	4.82218	0	2.69008	0	0.906203	1.40308	0	2.80616	NA	0.131394	0.680167	AC068189.1	novel transcript, antisense to NDUFAF6
ENSG00000160606	5.71643	4.82218	12.1024	6.27686	14.8526	8.15583	8.65438	10.8905	6.41829	-0.762806	0.1317	0.680167	TLCD1	TLC domain containing 1 [Source:HGNC Symbol;Acc:HGNC:25177]
ENSG00000232713	3.81096	6.02772	2.79286	8.07025	3.1827	4.53102	4.73592	3.26217	6.20966	0.928682	0.131875	0.680167	AC010733.1	ribosomal protein S12 (RPS12) pseudogene
ENSG00000083223	10.4801	0	8.37858	6.27686	6.3654	0.906203	5.4012	8.40804	2.39436	-1.81213	0.13216	0.680167	TUT7	terminal uridylyl transferase 7 [Source:HGNC Symbol;Acc:HGNC:25817]
ENSG00000256013	0	2.41109	0	1.79339	0	6.34342	1.75798	0	3.51597	NA	0.132398	0.680167	AC027277.1	novel transcript, antisense to EMP2
ENSG00000218283	24.7712	39.783	38.1691	41.248	22.2789	29.9047	32.6925	28.4064	36.9785	0.380472	0.132584	0.680167	MORF4L1P1	mortality factor 4 like 1 pseudogene 1 [Source:HGNC Symbol;Acc:HGNC:20400]
ENSG00000125245	32.3931	30.1386	43.7548	28.6942	43.4969	26.2799	34.1263	39.8816	28.3709	-0.491311	0.132619	0.680167	GPR18	G protein-coupled receptor 18 [Source:HGNC Symbol;Acc:HGNC:4472]
ENSG00000119723	35.2513	50.6329	39.1	41.248	32.8879	44.404	40.5873	35.7464	45.4283	0.345791	0.13267	0.680167	COQ6	coenzyme Q6, monooxygenase [Source:HGNC Symbol;Acc:HGNC:20233]
ENSG00000267598	145.769	85.5937	85.6477	54.6984	215.363	82.4645	111.589	148.927	74.2522	-1.0041	0.132727	0.680167	AC011446.2	novel transcript, antisense to IER2
ENSG00000162526	35.2513	13.261	45.6167	25.1075	44.5578	41.6853	34.2466	41.8086	26.6846	-0.647793	0.132794	0.680167	TSSK3	testis specific serine kinase 3 [Source:HGNC Symbol;Acc:HGNC:15473]
ENSG00000265316	179.115	126.582	120.093	97.7397	187.779	81.5583	132.145	162.329	101.96	-0.670918	0.132921	0.680167	AP005059.2	novel transcript, antisense to EPB41L3
ENSG00000281370	10.4801	22.9053	18.6191	22.4174	7.42631	11.7806	15.6048	12.1752	19.0345	0.644672	0.132993	0.680167	NA	NA
ENSG00000168010	410.631	393.008	304.422	298.599	328.879	297.235	338.795	347.977	329.614	-0.0782157	0.133013	0.680167	ATG16L2	autophagy related 16 like 2 [Source:HGNC Symbol;Acc:HGNC:25464]
ENSG00000149476	34.2986	19.2887	26.0667	23.3141	43.4969	23.5613	28.3377	34.6207	22.0547	-0.650551	0.133069	0.680167	TKFC	triokinase and FMN cyclase [Source:HGNC Symbol;Acc:HGNC:24552]
ENSG00000146205	0	2.41109	1.86191	2.69008	1.0609	1.81241	1.6394	0.974269	2.30453	1.24208	0.133095	0.680167	ANO7	anoctamin 7 [Source:HGNC Symbol;Acc:HGNC:31677]
ENSG00000237259	3.81096	6.02772	5.58572	9.86364	3.1827	12.6868	6.8596	4.19313	9.52607	1.18386	0.133144	0.680167	AL049646.2	novel transcript
ENSG00000204616	0.952739	0	3.72381	3.58678	1.0609	0	1.55404	1.91248	1.19559	-0.677721	0.133188	0.680167	TRIM31	tripartite motif containing 31 [Source:HGNC Symbol;Acc:HGNC:16289]
ENSG00000043462	4.7637	0	4.65477	2.69008	2.1218	0.906203	2.52276	3.84675	1.19876	-1.6821	0.133712	0.680167	LCP2	lymphocyte cytosolic protein 2 [Source:HGNC Symbol;Acc:HGNC:6529]
ENSG00000115286	0.952739	1.20554	0	0.896695	2.1218	3.62481	1.46693	1.02485	1.90902	0.897422	0.133972	0.680167	NDUFS7	NADH:ubiquinone oxidoreductase core subunit S7 [Source:HGNC Symbol;Acc:HGNC:7714]
ENSG00000139192	74.3136	62.6883	99.612	77.1158	114.577	64.3404	82.1079	96.1676	68.0482	-0.498995	0.134269	0.680167	TAPBPL	TAP binding protein like [Source:HGNC Symbol;Acc:HGNC:30683]
ENSG00000164134	0.952739	3.61663	0.930953	8.96695	1.0609	3.62481	3.19216	0.981531	5.4028	2.4606	0.134289	0.680167	NAA15	N(alpha)-acetyltransferase 15, NatA auxiliary subunit [Source:HGNC Symbol;Acc:HGNC:30782]
ENSG00000204577	20.9603	0	25.1357	13.4504	65.7759	17.2179	23.7567	37.2906	10.2228	-1.86703	0.13443	0.680167	LILRB3	leukocyte immunoglobulin like receptor B3 [Source:HGNC Symbol;Acc:HGNC:6607]
ENSG00000206249	37.1568	1.20554	78.2001	5.38017	28.6443	13.593	27.3633	48.0004	6.72625	-2.83517	0.134454	0.680167	AL359555.1	novel transcript
ENSG00000131115	20.9603	21.6998	17.6881	22.4174	10.609	13.593	17.8279	16.4191	19.2367	0.228487	0.134812	0.680167	ZNF227	zinc finger protein 227 [Source:HGNC Symbol;Acc:HGNC:13020]
ENSG00000225450	426.827	291.742	400.31	358.678	483.771	437.696	399.837	436.969	362.705	-0.268734	0.134829	0.680167	AL021707.1	novel transcript
ENSG00000223984	14.2911	27.7275	19.55	23.3141	12.7308	35.3419	22.1592	15.524	28.7945	0.891296	0.13492	0.680167	HNRNPRP1	heterogeneous nuclear ribonucleoprotein R pseudogene 1 [Source:HGNC Symbol;Acc:HGNC:44907]
ENSG00000242479	6.66917	8.43881	2.79286	7.17356	2.1218	10.8744	6.34511	3.86128	8.82894	1.19316	0.134939	0.680167	AC109992.1	eukaryotic translation initiation factor 2-alpha kinase 1 (EIF2AK1) pseudogene
ENSG00000108515	976.558	966.847	723.351	649.207	937.836	859.987	852.297	879.248	825.347	-0.0912698	0.135117	0.680167	ENO3	enolase 3 [Source:HGNC Symbol;Acc:HGNC:3354]
ENSG00000072682	196.264	166.365	222.498	131.814	336.306	171.272	204.087	251.689	156.484	-0.685629	0.135133	0.680167	P4HA2	prolyl 4-hydroxylase subunit alpha 2 [Source:HGNC Symbol;Acc:HGNC:8547]
ENSG00000113140	4.7637	3.61663	4.65477	4.48347	3.1827	1.81241	3.75228	4.20039	3.30417	-0.346234	0.135318	0.680167	SPARC	secreted protein acidic and cysteine rich [Source:HGNC Symbol;Acc:HGNC:11219]
ENSG00000003987	50.4952	37.3719	72.6143	43.938	56.2277	49.8412	51.7481	59.7791	43.717	-0.451445	0.13539	0.680167	MTMR7	myotubularin related protein 7 [Source:HGNC Symbol;Acc:HGNC:7454]
ENSG00000103365	1.90548	0	1.86191	0.896695	4.2436	0	1.48461	2.67033	0.298898	-3.15929	0.135432	0.680167	GGA2	golgi associated, gamma adaptin ear containing, ARF binding protein 2 [Source:HGNC Symbol;Acc:HGNC:16064]
ENSG00000114656	0.952739	3.61663	0.930953	1.79339	4.2436	9.06203	3.43323	2.04243	4.82402	1.23995	0.135488	0.680167	KIAA1257	KIAA1257 [Source:HGNC Symbol;Acc:HGNC:29231]
ENSG00000243766	1.90548	4.82218	2.79286	12.5537	20.1571	23.5613	10.9654	8.28515	13.6457	0.71985	0.135578	0.680167	HOTTIP	HOXA distal transcript antisense RNA [Source:HGNC Symbol;Acc:HGNC:37461]
ENSG00000231102	7.62191	0	1.86191	0	9.54811	6.34342	4.22922	6.34398	2.11447	-1.58509	0.135637	0.680167	AL035588.1	novel transcript
ENSG00000131153	3.81096	6.02772	0.930953	1.79339	1.0609	5.43722	3.17686	1.93427	4.41944	1.19208	0.135821	0.680167	GINS2	GINS complex subunit 2 [Source:HGNC Symbol;Acc:HGNC:24575]
ENSG00000204776	0.952739	2.41109	0	3.58678	0	0.906203	1.30947	0.31758	2.30136	2.85729	0.135934	0.680167	IGKV1OR-3	immunoglobulin kappa variable 1/OR-3 (pseudogene) [Source:HGNC Symbol;Acc:HGNC:5762]
ENSG00000234456	7.62191	9.64436	8.37858	21.5207	11.6699	19.9365	13.1287	9.22347	17.0338	0.885022	0.135979	0.680167	MAGI2-AS3	MAGI2 antisense RNA 3 [Source:HGNC Symbol;Acc:HGNC:40862]
ENSG00000203963	1.90548	0	7.44762	2.69008	9.54811	0	3.59855	6.3004	0.896695	-2.81276	0.136305	0.680167	C1orf141	chromosome 1 open reading frame 141 [Source:HGNC Symbol;Acc:HGNC:32044]
ENSG00000160200	7.62191	1.20554	4.65477	0.896695	1.0609	0	2.5733	4.44586	0.700746	-2.6655	0.136395	0.680167	CBS	cystathionine beta-synthase [Source:HGNC Symbol;Acc:HGNC:1550]
ENSG00000267703	62.8808	40.9885	47.4786	44.8347	68.9586	49.8412	52.4971	59.7726	45.2215	-0.402477	0.136413	0.680167	AC020917.2	novel transcript, antisense EPS15L1
ENSG00000135517	2.85822	3.61663	1.86191	4.48347	0	4.53102	2.89187	1.57337	4.21037	1.42009	0.136499	0.680167	MIP	major intrinsic protein of lens fiber [Source:HGNC Symbol;Acc:HGNC:7103]
ENSG00000257449	14.2911	18.0832	15.8262	25.1075	13.7917	32.6233	19.9538	14.6363	25.2713	0.787946	0.136585	0.680167	AC034102.3	novel transcript , antisense to IKZF4
ENSG00000281275	49.5424	51.8384	40.9619	52.905	45.6187	62.528	50.5658	45.3744	55.7571	0.297279	0.136598	0.680167	NA	NA
ENSG00000257950	10.4801	28.9331	5.58572	17.0372	5.3045	8.15583	12.5827	7.12345	18.042	1.34071	0.13661	0.680167	P2RX5-TAX1BP3	P2RX5-TAX1BP3 readthrough (NMD candidate) [Source:HGNC Symbol;Acc:HGNC:49191]
ENSG00000123552	31.4404	36.1663	25.1357	37.6612	20.1571	23.5613	29.0203	25.5777	32.4629	0.343904	0.136672	0.680167	USP45	ubiquitin specific peptidase 45 [Source:HGNC Symbol;Acc:HGNC:20080]
ENSG00000205220	1.90548	2.41109	1.86191	3.58678	4.2436	7.24963	3.54308	2.67033	4.41583	0.725667	0.136799	0.680167	PSMB10	proteasome 20S subunit beta 10 [Source:HGNC Symbol;Acc:HGNC:9538]
ENSG00000224658	19.0548	6.02772	20.481	18.8306	26.5225	12.6868	17.2672	22.0194	12.5151	-0.815112	0.136981	0.680167	AL513164.1	novel transcript
ENSG00000170909	1.90548	2.41109	0	3.58678	2.1218	6.34342	2.7281	1.34243	4.11376	1.61562	0.137079	0.680167	OSCAR	osteoclast associated Ig-like receptor [Source:HGNC Symbol;Acc:HGNC:29960]
ENSG00000255670	52.4006	43.3996	81.9239	22.4174	75.324	38.0605	52.2543	69.8828	34.6258	-1.01309	0.137298	0.680167	AC007619.1	novel transcript
ENSG00000105671	2.85822	3.61663	0	5.38017	6.3654	9.96823	4.69811	3.07454	6.32168	1.03994	0.137304	0.680167	DDX49	DEAD-box helicase 49 [Source:HGNC Symbol;Acc:HGNC:18684]
ENSG00000254907	160.06	300.181	208.533	292.323	145.343	167.648	212.348	171.312	253.384	0.564694	0.137315	0.680167	AC087276.3	novel transcript, antisense to API5 and TTC17
ENSG00000204623	506.857	116.938	640.496	466.281	1155.32	327.139	535.505	767.558	303.453	-1.3388	0.137322	0.680167	ZNRD1ASP	zinc ribbon domain containing 1 antisense, pseudogene [Source:HGNC Symbol;Acc:HGNC:13924]
ENSG00000227678	33.3459	19.2887	46.5477	44.8347	33.9488	22.6551	33.4368	37.9474	28.9262	-0.391627	0.137351	0.680167	AL355581.1	novel transcript, antisense to L3MBTL3
ENSG00000235904	45.7315	72.3327	55.8572	61.8719	49.8623	61.6218	57.8796	50.4837	65.2755	0.370724	0.137366	0.680167	RBMS3-AS3	RBMS3 antisense RNA 3 [Source:HGNC Symbol;Acc:HGNC:39989]
ENSG00000042062	25.724	15.6721	28.8595	16.1405	62.5931	27.1861	29.3626	39.0589	19.6662	-0.98993	0.137458	0.680167	RIPOR3	RIPOR family member 3 [Source:HGNC Symbol;Acc:HGNC:16168]
ENSG00000030304	15.2438	13.261	37.2381	25.1075	46.6796	30.8109	28.0568	33.0539	23.0598	-0.51944	0.137609	0.680167	MUSK	muscle associated receptor tyrosine kinase [Source:HGNC Symbol;Acc:HGNC:7525]
ENSG00000011485	0	1.20554	0	2.69008	2.1218	2.71861	1.45601	0.707267	2.20475	1.64029	0.137635	0.680167	PPP5C	protein phosphatase 5 catalytic subunit [Source:HGNC Symbol;Acc:HGNC:9322]
ENSG00000253973	44.7787	75.9493	35.3762	78.0125	24.4007	29.9047	48.0704	34.8519	61.2888	0.814387	0.137684	0.680167	AC079296.1	novel transcript
ENSG00000267009	974.652	904.158	1229.79	694.042	1320.82	718.619	973.68	1175.09	772.273	-0.605585	0.13769	0.680167	AC007780.1	novel transcript
ENSG00000139725	9.52739	6.02772	11.1714	9.86364	12.7308	11.7806	10.1836	11.1432	9.224	-0.2727	0.137693	0.680167	RHOF	ras homolog family member F, filopodia associated [Source:HGNC Symbol;Acc:HGNC:15703]
ENSG00000254602	23.8185	14.4665	30.7215	9.86364	25.4616	20.8427	20.8624	26.6672	15.0576	-0.824572	0.137736	0.680167	AP000662.1	novel transcript, sense overlapping CLP1
ENSG00000151067	26.6767	40.9885	40.9619	49.3182	27.5834	29.9047	35.9056	31.7407	40.0705	0.336207	0.137852	0.680167	CACNA1C	calcium voltage-gated channel subunit alpha1 C [Source:HGNC Symbol;Acc:HGNC:1390]
ENSG00000230593	76.2191	68.716	76.3382	64.562	97.6029	67.9652	75.2339	83.3867	67.0811	-0.313911	0.137966	0.680167	PPIAP40	peptidylprolyl isomerase A pseudogene 40 [Source:HGNC Symbol;Acc:HGNC:53664]
ENSG00000243368	36.2041	57.8661	66.0977	104.913	54.1059	60.7156	63.3171	52.1359	74.4983	0.514931	0.138116	0.680167	MCCC1-AS1	MCCC1 antisense RNA 1 [Source:HGNC Symbol;Acc:HGNC:40366]
ENSG00000156875	1.90548	1.20554	6.51667	0.896695	4.2436	0	2.46133	4.22192	0.700746	-2.59093	0.138201	0.680167	MFSD14A	major facilitator superfamily domain containing 14A [Source:HGNC Symbol;Acc:HGNC:23363]
ENSG00000232608	0.952739	3.61663	2.79286	3.58678	0	0.906203	1.97587	1.24853	2.70321	1.11444	0.138218	0.680167	TIMM9P2	TIMM9 pseudogene 2 [Source:HGNC Symbol;Acc:HGNC:39929]
ENSG00000079257	615.469	691.983	724.281	741.567	543.181	662.434	663.153	627.644	698.661	0.154647	0.138249	0.680167	LXN	latexin [Source:HGNC Symbol;Acc:HGNC:13347]
ENSG00000108559	275.342	414.707	320.248	350.608	257.799	320.796	323.25	284.463	362.037	0.347897	0.138298	0.680167	NUP88	nucleoporin 88 [Source:HGNC Symbol;Acc:HGNC:8067]
ENSG00000110514	3.81096	0	1.86191	0	8.48721	0	2.36001	4.72002	0	NA	0.138355	0.680167	MADD	MAP kinase activating death domain [Source:HGNC Symbol;Acc:HGNC:6766]
ENSG00000165275	14.2911	3.61663	9.30953	8.07025	14.8526	4.53102	9.11186	12.8177	5.40597	-1.24552	0.138428	0.680167	TRMT10B	tRNA methyltransferase 10B [Source:HGNC Symbol;Acc:HGNC:26454]
ENSG00000278338	3.81096	16.8776	6.51667	18.8306	2.1218	3.62481	8.63041	4.14981	13.111	1.65966	0.138545	0.680167	VWA8-AS1	VWA8 antisense RNA 1 (head to head) [Source:HGNC Symbol;Acc:HGNC:44270]
ENSG00000142208	2.85822	3.61663	0	3.58678	1.0609	2.71861	2.30686	1.30637	3.30734	1.34011	0.138606	0.680167	AKT1	AKT serine/threonine kinase 1 [Source:HGNC Symbol;Acc:HGNC:391]
ENSG00000010704	19.0548	0	3.72381	0.896695	26.5225	2.71861	8.8194	16.4337	1.2051	-3.76943	0.138634	0.680167	HFE	homeostatic iron regulator [Source:HGNC Symbol;Acc:HGNC:4886]
ENSG00000115183	2.85822	8.43881	3.72381	6.27686	4.2436	5.43722	5.16309	3.60854	6.71763	0.896536	0.138642	0.680167	TANC1	tetratricopeptide repeat, ankyrin repeat and coiled-coil containing 1 [Source:HGNC Symbol;Acc:HGNC:29364]
ENSG00000179133	0.952739	0	1.86191	0	4.2436	0	1.17637	2.35275	0	NA	0.138647	0.680167	C10orf67	chromosome 10 open reading frame 67 [Source:HGNC Symbol;Acc:HGNC:28716]
ENSG00000181991	2.85822	1.20554	4.65477	1.79339	3.1827	2.71861	2.73554	3.56523	1.90585	-0.903561	0.138654	0.680167	MRPS11	mitochondrial ribosomal protein S11 [Source:HGNC Symbol;Acc:HGNC:14050]
ENSG00000235423	59.0698	60.2772	36.3072	43.0414	35.0097	44.404	46.3515	43.4622	49.2408	0.180093	0.138763	0.680167	NA	NA
ENSG00000281378	5.71643	6.02772	0	2.69008	3.1827	5.43722	3.84236	2.96638	4.71834	0.669577	0.138829	0.680167	NA	NA
ENSG00000260441	34.2986	45.8107	20.481	22.4174	18.0353	24.4675	27.5851	24.2716	30.8985	0.348267	0.138834	0.680167	AC020978.2	novel transcript, antisense to PLA2G15
ENSG00000234006	2.85822	0	0.930953	0	5.3045	0	1.51561	3.03122	0	NA	0.138887	0.680167	DDX39B-AS1	DDX39B antisense RNA 1 [Source:HGNC Symbol;Acc:HGNC:39771]
ENSG00000159289	1.90548	2.41109	0.930953	4.48347	1.0609	5.43722	2.70485	1.29911	4.11059	1.66182	0.139542	0.680167	GOLGA6A	golgin A6 family member A [Source:HGNC Symbol;Acc:HGNC:13567]
ENSG00000171823	5.71643	7.23327	2.79286	9.86364	0	10.8744	6.08011	2.83643	9.32378	1.71684	0.139597	0.680167	FBXL14	F-box and leucine rich repeat protein 14 [Source:HGNC Symbol;Acc:HGNC:28624]
ENSG00000049449	3.81096	6.02772	10.2405	14.3471	2.1218	11.7806	8.05479	5.39108	10.7185	0.991456	0.139813	0.680167	RCN1	reticulocalbin 1 [Source:HGNC Symbol;Acc:HGNC:9934]
ENSG00000129450	10.4801	0	7.44762	6.27686	12.7308	2.71861	6.60901	10.2195	2.99849	-1.76902	0.139882	0.680167	SIGLEC9	sialic acid binding Ig like lectin 9 [Source:HGNC Symbol;Acc:HGNC:10878]
ENSG00000170482	14.2911	12.0554	14.8952	9.86364	30.7661	19.9365	16.968	19.9842	13.9519	-0.5184	0.139986	0.680167	SLC23A1	solute carrier family 23 member 1 [Source:HGNC Symbol;Acc:HGNC:10974]
ENSG00000125651	3.81096	1.20554	2.79286	0	2.1218	1.81241	1.95726	2.90854	1.00598	-1.53169	0.140044	0.680167	GTF2F1	general transcription factor IIF subunit 1 [Source:HGNC Symbol;Acc:HGNC:4652]
ENSG00000224152	8.57465	7.23327	12.1024	2.69008	18.0353	6.34342	9.16319	12.9041	5.42226	-1.25087	0.140056	0.680167	AC009506.2	novel transcript, antisense to BAZ2B
ENSG00000063046	3.81096	4.82218	0.930953	8.96695	4.2436	9.96823	5.45715	2.99517	7.91912	1.4027	0.140115	0.680167	EIF4B	eukaryotic translation initiation factor 4B [Source:HGNC Symbol;Acc:HGNC:3285]
ENSG00000079459	1.90548	4.82218	1.86191	10.7603	6.3654	9.06203	5.79622	3.3776	8.21485	1.28224	0.140221	0.680167	FDFT1	farnesyl-diphosphate farnesyltransferase 1 [Source:HGNC Symbol;Acc:HGNC:3629]
ENSG00000164125	6.66917	6.02772	5.58572	3.58678	4.2436	3.62481	4.9563	5.4995	4.4131	-0.317506	0.140245	0.680167	GASK1B	golgi associated kinase 1B [Source:HGNC Symbol;Acc:HGNC:25312]
ENSG00000246334	99.0849	47.0162	70.7524	53.8017	152.77	55.2784	79.7839	107.536	52.0321	-1.04734	0.140247	0.680167	PRR7-AS1	PRR7 antisense RNA 1 [Source:HGNC Symbol;Acc:HGNC:27961]
ENSG00000185674	5.71643	6.02772	3.72381	5.38017	2.1218	4.53102	4.58349	3.85402	5.31297	0.463156	0.140539	0.680167	LYG2	lysozyme g2 [Source:HGNC Symbol;Acc:HGNC:29615]
ENSG00000263393	7.62191	20.4943	8.37858	16.1405	11.6699	13.593	12.983	9.22347	16.7426	0.860143	0.140587	0.680167	AC011825.2	novel transcript, antisense to RNF138
ENSG00000135093	0	1.20554	0	0.896695	2.1218	5.43722	1.61021	0.707267	2.51315	1.82917	0.140684	0.680167	USP30	ubiquitin specific peptidase 30 [Source:HGNC Symbol;Acc:HGNC:20065]
ENSG00000258317	116.234	127.788	98.681	122.847	103.968	108.744	113.044	106.294	119.793	0.172478	0.140698	0.680167	AC034102.6	novel transcript, antisense to ZC3H10 and ESYT1
ENSG00000131378	19.0548	20.4943	10.2405	23.3141	24.4007	37.1543	22.4431	17.8987	26.9876	0.592442	0.140727	0.680167	RFTN1	raftlin, lipid raft linker 1 [Source:HGNC Symbol;Acc:HGNC:30278]
ENSG00000226330	962.266	775.165	947.71	915.525	1160.63	899.86	943.525	1023.53	863.517	-0.245263	0.140741	0.680167	AL606489.1	novel transcript
ENSG00000255276	8.57465	27.7275	13.0333	24.2108	16.9744	19.9365	18.4095	12.8608	23.9583	0.897542	0.14086	0.680167	RRM1-AS1	RRM1 antisense RNA 1 [Source:HGNC Symbol;Acc:HGNC:40512]
ENSG00000226360	8.57465	7.23327	8.37858	2.69008	13.7917	4.53102	7.53322	10.2483	4.81812	-1.08884	0.141121	0.680167	RPL10AP6	ribosomal protein L10a pseudogene 6 [Source:HGNC Symbol;Acc:HGNC:36504]
ENSG00000232387	0	1.20554	1.86191	5.38017	3.1827	9.96823	3.59976	1.68154	5.51798	1.71436	0.141249	0.680167	SKA2P1	spindle and kinetochore associated complex subunit 2 pseudogene 1 [Source:HGNC Symbol;Acc:HGNC:23122]
ENSG00000156574	20.9603	6.02772	19.55	17.9339	49.8623	35.3419	24.946	30.1242	19.7678	-0.607767	0.141366	0.680167	NODAL	nodal growth differentiation factor [Source:HGNC Symbol;Acc:HGNC:7865]
ENSG00000124151	13.3383	4.82218	17.6881	15.2438	23.3398	8.15583	13.7647	18.1221	9.40727	-0.945901	0.141377	0.680167	NCOA3	nuclear receptor coactivator 3 [Source:HGNC Symbol;Acc:HGNC:7670]
ENSG00000249967	6.66917	16.8776	17.6881	18.8306	12.7308	20.8427	15.6065	12.3627	18.8503	0.608594	0.1415	0.680167	AL355315.1	novel protein
ENSG00000079385	1.90548	4.82218	3.72381	11.657	4.2436	6.34342	5.44925	3.29096	7.60754	1.20892	0.141548	0.680167	CEACAM1	CEA cell adhesion molecule 1 [Source:HGNC Symbol;Acc:HGNC:1814]
ENSG00000141028	0	6.02772	4.65477	5.38017	7.42631	11.7806	5.87827	4.02702	7.72951	0.940663	0.141659	0.680167	CDRT15P1	CMT1A duplicated region transcript 15 pseudogene 1 [Source:HGNC Symbol;Acc:HGNC:33168]
ENSG00000254873	275.342	390.596	393.793	406.203	239.764	353.419	343.186	302.966	383.406	0.339717	0.141779	0.680167	AP001267.1	novel transcript, antisense to ATP5L and UBE4A
ENSG00000257337	2275.14	2461.72	2391.62	3118.7	2401.88	2676.02	2554.18	2356.21	2752.15	0.224088	0.141849	0.680167	AC068888.1	novel transcript, antisense to TENC1 & EIF4B
ENSG00000151575	21.913	34.9608	16.7572	39.4546	31.827	35.3419	30.0424	23.4991	36.5858	0.638679	0.141908	0.680167	TEX9	testis expressed 9 [Source:HGNC Symbol;Acc:HGNC:29585]
ENSG00000150687	672.634	723.327	688.905	897.592	507.111	854.55	724.02	622.883	825.156	0.405705	0.142259	0.680167	PRSS23	serine protease 23 [Source:HGNC Symbol;Acc:HGNC:14370]
ENSG00000116221	10.4801	12.0554	6.51667	16.1405	7.42631	12.6868	10.8843	8.14104	13.6276	0.743247	0.142351	0.680167	MRPL37	mitochondrial ribosomal protein L37 [Source:HGNC Symbol;Acc:HGNC:14034]
ENSG00000139154	2.85822	0	7.44762	4.48347	2.1218	1.81241	3.12059	4.14255	2.09863	-0.981073	0.142674	0.680167	AEBP2	AE binding protein 2 [Source:HGNC Symbol;Acc:HGNC:24051]
ENSG00000225261	1.90548	2.41109	2.79286	5.38017	4.2436	8.15583	4.14817	2.98065	5.3157	0.834633	0.142687	0.680167	NA	NA
ENSG00000224738	44.7787	107.293	41.8929	65.4587	40.3142	56.1846	59.3204	42.3286	76.3123	0.850282	0.142813	0.680167	AC099850.2	novel transcript
ENSG00000267774	20.0075	10.8499	35.3762	8.96695	68.9586	17.2179	26.8962	41.4474	12.3449	-1.74737	0.142857	0.680167	AC010776.2	novel transcript, antisense to CCBE1
ENSG00000281131	1.90548	1.20554	9.30953	2.69008	8.48721	1.81241	4.23504	6.56741	1.90268	-1.78729	0.142895	0.680167	SCHLAP1	SWI/SNF complex antagonist associated with prostate cancer 1 [Source:HGNC Symbol;Acc:HGNC:48603]
ENSG00000143257	35.2513	25.3164	22.3429	13.4504	58.3495	28.0923	30.4672	38.6479	22.2864	-0.794228	0.142924	0.680167	NR1I3	nuclear receptor subfamily 1 group I member 3 [Source:HGNC Symbol;Acc:HGNC:7969]
ENSG00000142945	0	1.20554	0	5.38017	3.1827	5.43722	2.53427	1.0609	4.00764	1.91746	0.143167	0.680167	KIF2C	kinesin family member 2C [Source:HGNC Symbol;Acc:HGNC:6393]
ENSG00000136630	4.7637	1.20554	2.79286	0.896695	8.48721	0	3.02433	5.34792	0.700746	-2.93201	0.143362	0.680167	HLX	H2.0 like homeobox [Source:HGNC Symbol;Acc:HGNC:4978]
ENSG00000234203	366.805	207.354	277.424	241.211	364.95	299.047	292.798	336.393	249.204	-0.43282	0.143382	0.680167	AC004771.1	novel transcript, antisense to CAMTA2
ENSG00000231638	7.62191	1.20554	2.79286	0	3.1827	1.81241	2.76924	4.53249	1.00598	-2.1717	0.143415	0.680167	LUARIS	lncRNA upregulator of antiviral response interferon signaling [Source:HGNC Symbol;Acc:HGNC:40992]
ENSG00000136002	2.85822	2.41109	0.930953	0	2.1218	0	1.38701	1.97032	0.803696	-1.29371	0.143715	0.680167	ARHGEF4	Rho guanine nucleotide exchange factor 4 [Source:HGNC Symbol;Acc:HGNC:684]
ENSG00000141030	1.90548	4.82218	0	0.896695	0	0.906203	1.42176	0.635159	2.20836	1.79778	0.143972	0.680167	COPS3	COP9 signalosome subunit 3 [Source:HGNC Symbol;Acc:HGNC:2239]
ENSG00000256238	3.81096	12.0554	8.37858	20.624	2.1218	3.62481	8.43593	4.77045	12.1014	1.34298	0.144278	0.680167	SUPT16HP1	SPT16 homolog, facilitates chromatin remodeling subunit pseudogene 1 [Source:HGNC Symbol;Acc:HGNC:31388]
ENSG00000140093	3.81096	0	2.79286	0	10.609	0	2.8688	5.73761	0	NA	0.14429	0.680167	SERPINA10	serpin family A member 10 [Source:HGNC Symbol;Acc:HGNC:15996]
ENSG00000158748	0.952739	3.61663	0	0.896695	1.0609	1.81241	1.3899	0.671213	2.10858	1.65143	0.144322	0.680167	HTR6	5-hydroxytryptamine receptor 6 [Source:HGNC Symbol;Acc:HGNC:5301]
ENSG00000214872	12.3856	13.261	8.37858	8.96695	21.218	23.5613	14.6286	13.9941	15.2631	0.12523	0.144654	0.680167	SMTNL1	smoothelin like 1 [Source:HGNC Symbol;Acc:HGNC:32394]
ENSG00000168792	1.90548	1.20554	1.86191	0	3.1827	2.71861	1.81237	2.3167	1.30805	-0.824649	0.144683	0.680167	ABHD15	abhydrolase domain containing 15 [Source:HGNC Symbol;Acc:HGNC:26971]
ENSG00000186281	5.71643	12.0554	0.930953	14.3471	7.42631	9.96823	8.40742	4.69123	12.1236	1.36978	0.144891	0.680167	GPAT2	glycerol-3-phosphate acyltransferase 2, mitochondrial [Source:HGNC Symbol;Acc:HGNC:27168]
ENSG00000242553	181.973	191.682	133.126	156.922	149.587	154.961	161.375	154.895	167.855	0.115917	0.145094	0.680167	AP001432.1	novel transcript, antisense to DSCR3
ENSG00000100890	10.4801	4.82218	5.58572	4.48347	11.6699	9.06203	7.68391	9.24525	6.12256	-0.594577	0.145119	0.680167	PRORP	protein only RNase P catalytic subunit [Source:HGNC Symbol;Acc:HGNC:19958]
ENSG00000211679	0	7.23327	0	1.79339	0	2.71861	1.95754	0	3.91509	NA	0.145164	0.680167	IGLC3	immunoglobulin lambda constant 3 (Kern-Oz+ marker) [Source:HGNC Symbol;Acc:HGNC:5857]
ENSG00000267383	147.675	139.843	193.638	140.781	175.049	103.307	150.049	172.12	127.977	-0.427533	0.145277	0.680167	AC011447.3	novel transcript, antisense to ZNF486 and ZNF90
ENSG00000164164	221.035	446.051	283.01	377.509	173.988	222.926	287.42	226.011	348.829	0.626126	0.145375	0.680167	OTUD4	OTU deubiquitinase 4 [Source:HGNC Symbol;Acc:HGNC:24949]
ENSG00000251596	13.3383	16.8776	4.65477	17.0372	3.1827	7.24963	10.39	7.0586	13.7215	0.958982	0.145483	0.680167	HADHAP1	HADHA pseudogene 1 [Source:HGNC Symbol;Acc:HGNC:4802]
ENSG00000233483	418.252	179.626	192.707	96.843	746.874	239.238	312.257	452.611	171.902	-1.39668	0.145602	0.680167	AC008105.2	novel pseudogene, ortholog of 1700023F06Rik (M. musculus)
ENSG00000136827	9.52739	4.82218	10.2405	3.58678	20.1571	1.81241	8.35773	13.3083	3.40712	-1.9657	0.145663	0.680167	TOR1A	torsin family 1 member A [Source:HGNC Symbol;Acc:HGNC:3098]
ENSG00000134873	6.66917	7.23327	3.72381	7.17356	0	1.81241	4.43537	3.46433	5.40641	0.642095	0.145702	0.680167	CLDN10	claudin 10 [Source:HGNC Symbol;Acc:HGNC:2033]
ENSG00000179526	275.342	250.753	180.605	149.748	245.068	241.956	223.912	233.672	214.153	-0.125843	0.145789	0.680167	SHARPIN	SHANK associated RH domain interactor [Source:HGNC Symbol;Acc:HGNC:25321]
ENSG00000238202	180.068	162.749	154.538	1.79339	116.699	9.96823	104.303	150.435	58.17	-1.37079	0.146066	0.680167	NA	NA
ENSG00000253618	89.5575	97.6491	87.5096	157.818	96.542	144.993	112.345	91.203	133.487	0.549542	0.146104	0.680167	GRPEL2-AS1	GRPEL2 antisense RNA 1 [Source:HGNC Symbol;Acc:HGNC:48999]
ENSG00000213055	6.66917	6.02772	6.51667	0	5.3045	0	4.08635	6.16345	2.00924	-1.61709	0.146173	0.680167	EEF1B2P7	eukaryotic translation elongation factor 1 beta 2 pseudogene 7 [Source:HGNC Symbol;Acc:HGNC:51454]
ENSG00000269288	0	2.41109	0	0.896695	2.1218	2.71861	1.35803	0.707267	2.0088	1.50601	0.146336	0.680167	AC092070.3	novel transcript, antisense to ZNF677
ENSG00000279018	279.153	332.73	198.293	306.67	236.581	255.549	268.163	238.009	298.316	0.325828	0.146435	0.680167	NA	NA
ENSG00000262879	18.102	27.7275	12.1024	27.7975	81.6894	122.337	48.2927	37.2979	59.2875	0.668632	0.146479	0.680167	AC005670.3	novel transcript
ENSG00000165240	8.57465	16.8776	5.58572	11.657	6.3654	7.24963	9.38501	6.84192	11.9281	0.801889	0.146685	0.680167	ATP7A	ATPase copper transporting alpha [Source:HGNC Symbol;Acc:HGNC:869]
ENSG00000181788	0	9.64436	0	0.896695	0	9.06203	3.26718	0	6.53436	NA	0.146735	0.680167	SIAH2	siah E3 ubiquitin protein ligase 2 [Source:HGNC Symbol;Acc:HGNC:10858]
ENSG00000046653	13.3383	15.6721	4.65477	21.5207	12.7308	22.6551	15.0953	10.2413	19.9493	0.961937	0.146799	0.680167	GPM6B	glycoprotein M6B [Source:HGNC Symbol;Acc:HGNC:4461]
ENSG00000170579	43.826	30.1386	66.0977	43.0414	99.7247	40.7791	53.9346	69.8828	37.9864	-0.879455	0.146874	0.680167	DLGAP1	DLG associated protein 1 [Source:HGNC Symbol;Acc:HGNC:2905]
ENSG00000248969	61.928	63.8939	47.4786	52.905	60.4713	71.59	59.7111	56.626	62.7963	0.149215	0.146887	0.680167	AC137810.1	novel transcript, antisense to SPEF2
ENSG00000255301	0.952739	0	1.86191	0	2.1218	1.81241	1.12481	1.64548	0.604135	-1.44557	0.146908	0.680167	AP002893.1	novel transcript
ENSG00000242687	335.364	306.208	334.212	290.529	455.126	337.108	343.091	374.901	311.282	-0.268289	0.146971	0.680167	NA	NA
ENSG00000196557	18.102	20.4943	6.51667	29.5909	6.3654	23.5613	17.4384	10.328	24.5488	1.24909	0.147013	0.680167	CACNA1H	calcium voltage-gated channel subunit alpha1 H [Source:HGNC Symbol;Acc:HGNC:1395]
ENSG00000060069	3.81096	3.61663	4.65477	2.69008	2.1218	0	2.81571	3.52917	2.10224	-0.747404	0.147232	0.680167	CTDP1	CTD phosphatase subunit 1 [Source:HGNC Symbol;Acc:HGNC:2498]
ENSG00000215256	247.712	319.469	279.286	316.533	305.539	317.171	297.619	277.513	317.725	0.195224	0.147298	0.680167	DHRS4-AS1	DHRS4 antisense RNA 1 [Source:HGNC Symbol;Acc:HGNC:23175]
ENSG00000262959	2.85822	1.20554	4.65477	4.48347	2.1218	0.906203	2.705	3.21159	2.19841	-0.546831	0.147583	0.680167	RPL23AP86	ribosomal protein L23a pseudogene 86 [Source:HGNC Symbol;Acc:HGNC:51577]
ENSG00000101230	0	8.43881	3.72381	6.27686	1.0609	3.62481	3.8542	1.5949	6.1135	1.93853	0.147614	0.680167	ISM1	isthmin 1 [Source:HGNC Symbol;Acc:HGNC:16213]
ENSG00000109667	0.952739	2.41109	0	5.38017	0	1.81241	1.7594	0.31758	3.20122	3.33343	0.147903	0.680167	SLC2A9	solute carrier family 2 member 9 [Source:HGNC Symbol;Acc:HGNC:13446]
ENSG00000164070	3.81096	6.02772	6.51667	19.7273	4.2436	10.8744	8.53345	4.85708	12.2098	1.32988	0.147948	0.680167	HSPA4L	heat shock protein family A (Hsp70) member 4 like [Source:HGNC Symbol;Acc:HGNC:17041]
ENSG00000187017	6.66917	2.41109	7.44762	4.48347	3.1827	2.71861	4.48545	5.7665	3.20439	-0.847646	0.148057	0.680167	ESPN	espin [Source:HGNC Symbol;Acc:HGNC:13281]
ENSG00000136891	14.2911	19.2887	36.3072	36.7645	27.5834	32.6233	27.8097	26.0606	29.5588	0.181722	0.148077	0.680167	TEX10	testis expressed 10 [Source:HGNC Symbol;Acc:HGNC:25988]
ENSG00000114650	26.6767	24.1109	31.6524	23.3141	54.1059	38.0605	32.9868	37.4783	28.4952	-0.39534	0.148078	0.680167	SCAP	SREBF chaperone [Source:HGNC Symbol;Acc:HGNC:30634]
ENSG00000188153	4.7637	0	0.930953	0	2.1218	0	1.30274	2.60548	0	NA	0.148091	0.680167	COL4A5	collagen type IV alpha 5 chain [Source:HGNC Symbol;Acc:HGNC:2207]
ENSG00000184678	21.913	28.9331	12.1024	21.5207	30.7661	31.7171	24.4921	21.5938	27.3903	0.343045	0.148103	0.680167	H2BC21	H2B clustered histone 21 [Source:HGNC Symbol;Acc:HGNC:4760]
ENSG00000274866	61.928	66.305	58.65	93.2563	33.9488	55.2784	61.5611	51.509	71.6132	0.475402	0.148334	0.680167	AC051649.2
ENSG00000230082	13.3383	1.20554	7.44762	0.896695	6.3654	4.53102	5.63077	9.05046	2.21109	-2.03324	0.148364	0.680167	PRRT3-AS1	PRRT3 antisense RNA 1 [Source:HGNC Symbol;Acc:HGNC:41151]
ENSG00000269145	156.249	62.6883	96.8191	32.281	344.793	86.0893	129.82	199.287	60.3529	-1.72335	0.148387	0.680167	AC007192.2	novel transcript, antisense to MAST3
ENSG00000266074	4.7637	0	2.79286	0.896695	1.0609	0	1.58569	2.87249	0.298898	-3.26457	0.148636	0.680167	BAHCC1	BAH domain and coiled-coil containing 1 [Source:HGNC Symbol;Acc:HGNC:29279]
ENSG00000240882	1.90548	1.20554	3.72381	3.58678	2.1218	1.81241	2.39264	2.5837	2.20158	-0.2309	0.148676	0.680167	AC063952.2	prostate tumor overexpressed 1 (PTOV1) pseudogene
ENSG00000174485	2.85822	10.8499	2.79286	4.48347	2.1218	5.43722	4.75725	2.59096	6.92353	1.41802	0.148768	0.680167	DENND4A	DENN domain containing 4A [Source:HGNC Symbol;Acc:HGNC:24321]
ENSG00000236779	18.102	8.43881	16.7572	11.657	38.1924	14.4993	17.9411	24.3505	11.5317	-1.07835	0.149031	0.680167	AL512306.1	PEF protein with a long N-terminal hydrophobic domain (peflin) (PEF) pseudogene
ENSG00000271989	0	1.20554	0	4.48347	2.1218	3.62481	1.90594	0.707267	3.10461	2.13408	0.149106	0.680167	AL139424.1	novel transcript, antisense to APITD1-CORT
ENSG00000136279	0.952739	4.82218	0	0.896695	8.48721	9.96823	4.18784	3.14665	5.22904	0.732729	0.149161	0.680167	DBNL	drebrin like [Source:HGNC Symbol;Acc:HGNC:2696]
ENSG00000272770	0	1.20554	0	0.896695	1.0609	4.53102	1.28236	0.353634	2.21109	2.64443	0.149207	0.680167	AC005696.2	novel transcript, antisense to PAFAH1B1
ENSG00000268056	1264.28	836.648	901.163	808.819	1775.95	1061.16	1108	1313.8	902.21	-0.542208	0.149338	0.680167	AC020913.1	novel transcript, antisense MYO9B
ENSG00000188269	0.952739	1.20554	2.79286	4.48347	0	0.906203	1.72347	1.24853	2.19841	0.816225	0.149646	0.680167	OR7A5	olfactory receptor family 7 subfamily A member 5 [Source:HGNC Symbol;Acc:HGNC:8368]
ENSG00000175514	0.952739	0	2.79286	0.896695	2.1218	1.81241	1.42942	1.9558	0.903034	-1.11491	0.149711	0.680167	GPR152	G protein-coupled receptor 152 [Source:HGNC Symbol;Acc:HGNC:23622]
ENSG00000137135	76.2191	40.9885	59.581	41.248	56.2277	50.7474	54.1686	64.0093	44.328	-0.530065	0.149719	0.680167	ARHGEF39	Rho guanine nucleotide exchange factor 39 [Source:HGNC Symbol;Acc:HGNC:25909]
ENSG00000277290	0.952739	2.41109	0.930953	4.48347	1.0609	1.81241	1.94193	0.981531	2.90232	1.5641	0.149791	0.680167	AC136475.10	signal recognition particle 19kDa (SRP19) pseudogene
ENSG00000235958	236.279	224.231	239.255	208.033	266.286	259.174	238.876	247.273	230.48	-0.101469	0.1498	0.680167	UBOX5-AS1	UBOX5 antisense RNA 1 [Source:HGNC Symbol;Acc:HGNC:44111]
ENSG00000257022	1075.64	1162.14	1727.85	2196.01	602.592	816.489	1263.45	1135.36	1391.55	0.293538	0.149827	0.680167	AC008250.1	novel transcript
ENSG00000205581	3.81096	1.20554	9.30953	3.58678	1.0609	0	3.16229	4.72713	1.59744	-1.5652	0.149922	0.680167	HMGN1	high mobility group nucleosome binding domain 1 [Source:HGNC Symbol;Acc:HGNC:4984]
ENSG00000249906	27.6294	116.938	9.30953	34.0744	7.42631	36.2481	38.6043	14.7884	62.4201	2.07754	0.149975	0.680167	AC006487.1	novel transcript
ENSG00000230550	1.90548	3.61663	1.86191	5.38017	2.1218	2.71861	2.9341	1.96306	3.90514	0.992268	0.150042	0.680167	ERLNC1	estrogen receptor responsive lncRNA 1 [Source:HGNC Symbol;Acc:HGNC:41109]
ENSG00000231564	0	1.20554	1.86191	8.07025	0	2.71861	2.30939	0.620635	3.99814	2.68751	0.150188	0.680167	EIF4A1P11	eukaryotic translation initiation factor 4A1 pseudogene 11 [Source:HGNC Symbol;Acc:HGNC:37932]
ENSG00000182752	13.3383	15.6721	3.72381	5.38017	10.609	17.2179	10.9902	9.22372	12.7567	0.467834	0.150316	0.680167	PAPPA	pappalysin 1 [Source:HGNC Symbol;Acc:HGNC:8602]
ENSG00000177669	14.2911	6.02772	9.30953	4.48347	7.42631	6.34342	7.98026	10.3423	5.61821	-0.880377	0.150368	0.680167	MBOAT4	membrane bound O-acyltransferase domain containing 4 [Source:HGNC Symbol;Acc:HGNC:32311]
ENSG00000250902	80.0301	110.91	122.886	133.608	111.395	174.897	122.288	104.77	139.805	0.416188	0.150374	0.680167	SMAD1-AS1	SMAD1 antisense RNA 1 [Source:HGNC Symbol;Acc:HGNC:49379]
ENSG00000100711	4.7637	0	1.86191	0	1.0609	0	1.28108	2.56217	0	NA	0.150416	0.680167	ZFYVE21	zinc finger FYVE-type containing 21 [Source:HGNC Symbol;Acc:HGNC:20760]
ENSG00000174611	29.5349	6.02772	19.55	4.48347	81.6894	18.1241	26.5683	43.5914	9.54509	-2.19121	0.150621	0.680167	KY	kyphoscoliosis peptidase [Source:HGNC Symbol;Acc:HGNC:26576]
ENSG00000254855	40.9678	36.1663	21.4119	12.5537	21.218	19.9365	25.3757	27.8659	22.8855	-0.284066	0.150701	0.680167	AP001107.8	novel transcript
ENSG00000087303	18.102	24.1109	25.1357	26.0042	9.54811	18.1241	20.1708	17.5953	22.7464	0.370447	0.150899	0.680167	NID2	nidogen 2 [Source:HGNC Symbol;Acc:HGNC:13389]
ENSG00000125872	0.952739	7.23327	1.86191	2.69008	0	3.62481	2.72713	0.938215	4.51605	2.26707	0.150938	0.680167	LRRN4	leucine rich repeat neuronal 4 [Source:HGNC Symbol;Acc:HGNC:16208]
ENSG00000272568	16.1966	36.1663	7.44762	17.9339	4.2436	7.24963	14.8729	9.29593	20.45	1.13743	0.150985	0.680167	AC005162.2	novel transcript, antisense to CPVL
ENSG00000162188	4.7637	18.0832	3.72381	9.86364	8.48721	10.8744	9.29933	5.65824	12.9404	1.19346	0.151176	0.680167	GNG3	G protein subunit gamma 3 [Source:HGNC Symbol;Acc:HGNC:4405]
ENSG00000157306	43.826	19.2887	26.9976	22.4174	25.4616	14.4993	25.4151	32.0951	18.7351	-0.776608	0.151202	0.680167	ZFHX2-AS1	ZFHX2 antisense RNA 1 [Source:HGNC Symbol;Acc:HGNC:52658]
ENSG00000103061	162.918	136.227	184.329	107.603	176.11	156.773	153.993	174.452	133.534	-0.385621	0.151289	0.680167	SLC7A6OS	solute carrier family 7 member 6 opposite strand [Source:HGNC Symbol;Acc:HGNC:25807]
ENSG00000003509	126.714	125.377	100.543	86.9794	110.334	94.2451	107.365	112.53	102.2	-0.138913	0.15146	0.680167	NDUFAF7	NADH:ubiquinone oxidoreductase complex assembly factor 7 [Source:HGNC Symbol;Acc:HGNC:28816]
ENSG00000233005	1.90548	0	1.86191	0	1.0609	0.906203	0.955748	1.60943	0.302068	-2.4136	0.151462	0.680167	AC018742.1	novel transcript
ENSG00000149577	54.3061	37.3719	26.9976	24.2108	58.3495	32.6233	38.9765	46.5511	31.402	-0.56796	0.151535	0.680167	SIDT2	SID1 transmembrane family member 2 [Source:HGNC Symbol;Acc:HGNC:24272]
ENSG00000266969	19.0548	34.9608	21.4119	36.7645	22.2789	23.5613	26.3387	20.9152	31.7622	0.602758	0.151567	0.680167	AP002449.1	novel transcript, antisense SEH1L
ENSG00000166444	14.2911	8.43881	13.9643	13.4504	19.0962	12.6868	13.6546	15.7839	11.5254	-0.453639	0.151647	0.680167	DENND2B	DENN domain containing 2B [Source:HGNC Symbol;Acc:HGNC:11350]
ENSG00000172594	1.90548	0	2.79286	0.896695	1.0609	0.906203	1.26036	1.91975	0.600966	-1.67556	0.151684	0.680167	SMPDL3A	sphingomyelin phosphodiesterase acid like 3A [Source:HGNC Symbol;Acc:HGNC:17389]
ENSG00000227968	1.90548	0	2.79286	0.896695	1.0609	0.906203	1.26036	1.91975	0.600966	-1.67556	0.151684	0.680167	BUB3P1	BUB3 mitotic checkpoint protein pseudogene 1 [Source:HGNC Symbol;Acc:HGNC:51559]
ENSG00000134905	6.66917	7.23327	8.37858	8.96695	5.3045	7.24963	7.30035	6.78408	7.81661	0.204389	0.152019	0.680167	CARS2	cysteinyl-tRNA synthetase 2, mitochondrial [Source:HGNC Symbol;Acc:HGNC:25695]
ENSG00000143951	490.661	841.47	609.774	722.736	384.046	479.381	588.011	494.827	681.196	0.461146	0.15204	0.680167	WDPCP	WD repeat containing planar cell polarity effector [Source:HGNC Symbol;Acc:HGNC:28027]
ENSG00000262533	81.9356	86.7992	69.8215	105.81	70.0195	120.525	89.1518	73.9255	104.378	0.497675	0.152091	0.680167	AC090617.3	novel transcript, antisense to DPH1 and OVCA2
ENSG00000107438	0.952739	0	0.930953	0	3.1827	0	0.844399	1.6888	0	NA	0.152202	0.680167	PDLIM1	PDZ and LIM domain 1 [Source:HGNC Symbol;Acc:HGNC:2067]
ENSG00000120254	0.952739	0	0.930953	0	3.1827	0	0.844399	1.6888	0	NA	0.152202	0.680167	MTHFD1L	methylenetetrahydrofolate dehydrogenase (NADP+ dependent) 1 like [Source:HGNC Symbol;Acc:HGNC:21055]
ENSG00000171478	1.90548	0	1.86191	0	6.3654	0	1.6888	3.3776	0	NA	0.152202	0.680167	SPACA5B	sperm acrosome associated 5B [Source:HGNC Symbol;Acc:HGNC:19142]
ENSG00000198792	0.952739	0	0.930953	0	3.1827	0	0.844399	1.6888	0	NA	0.152202	0.680167	TMEM184B	transmembrane protein 184B [Source:HGNC Symbol;Acc:HGNC:1310]
ENSG00000205832	0.952739	0	0.930953	0	3.1827	0	0.844399	1.6888	0	NA	0.152202	0.680167	C16orf96	chromosome 16 open reading frame 96 [Source:HGNC Symbol;Acc:HGNC:40031]
ENSG00000110799	2.85822	0	1.86191	0	2.1218	1.81241	1.44239	2.28064	0.604135	-1.9165	0.15222	0.680167	VWF	von Willebrand factor [Source:HGNC Symbol;Acc:HGNC:12726]
ENSG00000183808	3.81096	4.82218	0.930953	3.58678	2.1218	2.71861	2.99855	2.2879	3.70919	0.697078	0.152241	0.680167	RBM12B	RNA binding motif protein 12B [Source:HGNC Symbol;Acc:HGNC:32310]
ENSG00000225205	1228.08	2305	759.658	3437.93	641.845	1205.25	1596.29	876.528	2316.06	1.4018	0.152254	0.680167	AC078883.1	novel transcript
ENSG00000278259	38.1096	77.1549	69.8215	76.2191	49.8623	68.8714	63.3398	52.5978	74.0818	0.494117	0.152273	0.680167	MYO19	myosin XIX [Source:HGNC Symbol;Acc:HGNC:26234]
ENSG00000005436	164.824	272.453	165.71	219.69	132.613	149.524	184.135	154.382	213.889	0.470357	0.152318	0.680167	GCFC2	GC-rich sequence DNA-binding factor 2 [Source:HGNC Symbol;Acc:HGNC:1317]
ENSG00000255306	12.3856	33.7552	24.2048	26.0042	22.2789	45.3102	27.3231	19.6231	35.0232	0.835757	0.152398	0.680167	AC004923.4	novel transcript
ENSG00000183921	0	1.20554	0.930953	4.48347	0	0.906203	1.25436	0.310318	2.19841	2.82464	0.152648	0.680167	SDR42E2	short chain dehydrogenase/reductase family 42E, member 2 [Source:HGNC Symbol;Acc:HGNC:35414]
ENSG00000123384	1.90548	4.82218	5.58572	13.4504	0	1.81241	4.59603	2.49707	6.695	1.42285	0.152727	0.680167	LRP1	LDL receptor related protein 1 [Source:HGNC Symbol;Acc:HGNC:6692]
ENSG00000147535	17.1493	28.9331	18.6191	19.7273	10.609	19.0303	19.0113	15.4591	22.5635	0.545535	0.15288	0.680167	PLPP5	phospholipid phosphatase 5 [Source:HGNC Symbol;Acc:HGNC:25026]
ENSG00000158865	0.952739	0	8.37858	7.17356	6.3654	2.71861	4.26481	5.23224	3.29739	-0.666105	0.153109	0.680167	SLC5A11	solute carrier family 5 member 11 [Source:HGNC Symbol;Acc:HGNC:23091]
ENSG00000227175	0.952739	1.20554	0.930953	2.69008	1.0609	3.62481	1.74417	0.981531	2.50681	1.35275	0.153147	0.680167	AL590677.2	novel transcript
ENSG00000049618	0.952739	8.43881	7.44762	8.07025	3.1827	9.06203	6.19236	3.86102	8.5237	1.1425	0.153385	0.680167	ARID1B	AT-rich interaction domain 1B [Source:HGNC Symbol;Acc:HGNC:18040]
ENSG00000164543	7.62191	18.0832	16.7572	18.8306	7.42631	11.7806	13.4166	10.6018	16.2315	0.614485	0.153527	0.680167	STK17A	serine/threonine kinase 17a [Source:HGNC Symbol;Acc:HGNC:11395]
ENSG00000085871	100.038	78.3604	64.2358	60.9752	97.6029	65.2466	77.7431	87.2921	68.1941	-0.356204	0.153624	0.680167	MGST2	microsomal glutathione S-transferase 2 [Source:HGNC Symbol;Acc:HGNC:7063]
ENSG00000179151	13.3383	10.8499	8.37858	3.58678	13.7917	1.81241	8.62629	11.8362	5.41636	-1.12781	0.153761	0.680167	EDC3	enhancer of mRNA decapping 3 [Source:HGNC Symbol;Acc:HGNC:26114]
ENSG00000044446	19.0548	26.522	9.30953	24.2108	9.54811	46.2164	22.4769	12.6375	32.3164	1.35456	0.153773	0.680167	PHKA2	phosphorylase kinase regulatory subunit alpha 2 [Source:HGNC Symbol;Acc:HGNC:8926]
ENSG00000162510	1.90548	1.20554	3.72381	0.896695	10.609	5.43722	3.96296	5.41277	2.51315	-1.10687	0.153855	0.680167	MATN1	matrilin 1 [Source:HGNC Symbol;Acc:HGNC:6907]
ENSG00000169100	36.2041	15.6721	16.7572	10.7603	51.9841	11.7806	23.8597	34.9818	12.7377	-1.4575	0.153967	0.680167	SLC25A6	solute carrier family 25 member 6 [Source:HGNC Symbol;Acc:HGNC:10992]
ENSG00000278131	5.71643	3.61663	3.72381	1.79339	1.0609	0.906203	2.8029	3.50038	2.10541	-0.733412	0.154154	0.680167	AC116050.1	otopetrin 1 (OTOP1) pseudogene
ENSG00000280410	1.90548	2.41109	0	1.79339	1.0609	4.53102	1.95031	0.988793	2.91183	1.55819	0.154346	0.680167	NA	NA
ENSG00000131238	30.4876	20.4943	9.30953	7.17356	25.4616	8.15583	16.8471	21.7529	11.9412	-0.86526	0.154414	0.680167	PPT1	palmitoyl-protein thioesterase 1 [Source:HGNC Symbol;Acc:HGNC:9325]
ENSG00000273507	0	1.20554	0	3.58678	0	0.906203	0.949755	0	1.89951	NA	0.154437	0.680167	AL354809.1	novel transcript
ENSG00000118482	0.952739	0	2.79286	1.79339	4.2436	0.906203	1.78147	2.66307	0.899864	-1.56531	0.154443	0.680167	PHF3	PHD finger protein 3 [Source:HGNC Symbol;Acc:HGNC:8921]
ENSG00000099290	4.7637	2.41109	4.65477	4.48347	2.1218	0	3.07247	3.84675	2.29819	-0.743145	0.154606	0.680167	WASHC2A	WASH complex subunit 2A [Source:HGNC Symbol;Acc:HGNC:23416]
ENSG00000233728	1.90548	2.41109	4.65477	8.07025	2.1218	7.24963	4.40217	2.89402	5.91032	1.03016	0.154887	0.680167	AL929472.3	novel transcript
ENSG00000170075	1.90548	0	2.79286	0.896695	7.42631	0.906203	2.32126	4.04155	0.600966	-2.74955	0.155016	0.680167	GPR37L1	G protein-coupled receptor 37 like 1 [Source:HGNC Symbol;Acc:HGNC:14923]
ENSG00000235880	121.951	73.5382	110.783	44.8347	267.347	72.4963	115.158	166.694	63.6231	-1.38958	0.155233	0.680167	AL158832.1	novel transcript
ENSG00000205726	10.4801	1.20554	6.51667	4.48347	5.3045	1.81241	4.96712	7.43377	2.50048	-1.57189	0.155381	0.680167	ITSN1	intersectin 1 [Source:HGNC Symbol;Acc:HGNC:6183]
ENSG00000135678	0.952739	1.20554	0.930953	2.69008	0	0.906203	1.11425	0.627897	1.60061	1.35002	0.155455	0.680167	CPM	carboxypeptidase M [Source:HGNC Symbol;Acc:HGNC:2311]
ENSG00000241577	111.47	73.5382	67.9596	60.9752	124.125	61.6218	83.2818	101.185	65.3784	-0.630111	0.155584	0.680167	AC060234.3	novel transcript, sense intronic to LRRC18
ENSG00000249715	6.66917	12.0554	9.30953	9.86364	7.42631	10.8744	9.36642	7.80167	10.9312	0.486594	0.155611	0.680167	FER1L5	fer-1 like family member 5 [Source:HGNC Symbol;Acc:HGNC:19044]
ENSG00000198711	6.66917	7.23327	0.930953	8.96695	7.42631	15.4055	7.77202	5.00881	10.5352	1.07268	0.155796	0.680167	SSBP3-AS1	SSBP3 antisense RNA 1 [Source:HGNC Symbol;Acc:HGNC:32328]
ENSG00000205971	0.952739	3.61663	0.930953	4.48347	4.2436	4.53102	3.1264	2.04243	4.21037	1.04366	0.156116	0.680167	AC074389.1	lncRNA radiation induced regulator of PLK1 and RAD51
ENSG00000147059	1.90548	15.6721	7.44762	8.96695	9.54811	28.0923	11.9388	6.3004	17.5771	1.48018	0.156129	0.680167	SPIN2A	spindlin family member 2A [Source:HGNC Symbol;Acc:HGNC:20694]
ENSG00000182397	0	2.41109	0	4.48347	2.1218	2.71861	1.95583	0.707267	3.20439	2.17972	0.156157	0.680167	DNM1P46	dynamin 1 pseudogene 46 [Source:HGNC Symbol;Acc:HGNC:35199]
ENSG00000239465	7.62191	0	5.58572	3.58678	4.2436	1.81241	3.8084	5.81708	1.79973	-1.69252	0.156188	0.680167	AC090543.2	ribosomal protein L21 (RPL21) pseudogene
ENSG00000104901	0.952739	0	7.44762	1.79339	5.3045	2.71861	3.03614	4.56829	1.504	-1.60285	0.156208	0.680167	DKKL1	dickkopf like acrosomal protein 1 [Source:HGNC Symbol;Acc:HGNC:16528]
ENSG00000259138	511.621	732.971	448.719	584.645	382.985	406.885	511.304	447.775	574.834	0.36037	0.156329	0.680167	AL049780.2	novel transcript, antisense to NEK9 and TMED10
ENSG00000234925	82.8883	71.1271	60.5119	52.905	95.4811	62.528	70.9069	79.6271	62.1867	-0.356653	0.156361	0.680167	ATP5PDP4	ATP synthase peripheral stalk subunit d pseudogene 4 [Source:HGNC Symbol;Acc:HGNC:49626]
ENSG00000188738	40.9678	54.2495	61.4429	97.7397	49.8623	57.997	60.3765	50.7577	69.9954	0.463634	0.156379	0.680167	FSIP2	fibrous sheath interacting protein 2 [Source:HGNC Symbol;Acc:HGNC:21675]
ENSG00000115364	69.55	77.1549	50.2715	95.9463	36.0706	57.0908	64.3473	51.964	76.7307	0.56229	0.156424	0.680167	MRPL19	mitochondrial ribosomal protein L19 [Source:HGNC Symbol;Acc:HGNC:14052]
ENSG00000079739	1.90548	2.41109	1.86191	5.38017	6.3654	8.15583	4.34665	3.3776	5.3157	0.654262	0.156536	0.680167	PGM1	phosphoglucomutase 1 [Source:HGNC Symbol;Acc:HGNC:8905]
ENSG00000142168	48.5897	51.8384	42.8238	50.2149	16.9744	34.4357	40.8128	36.1293	45.4963	0.332581	0.156636	0.680167	SOD1	superoxide dismutase 1 [Source:HGNC Symbol;Acc:HGNC:11179]
ENSG00000172216	21.913	0	9.30953	3.58678	10.609	3.62481	8.17385	13.9438	2.40386	-2.5362	0.156645	0.680167	CEBPB	CCAAT enhancer binding protein beta [Source:HGNC Symbol;Acc:HGNC:1834]
ENSG00000179994	11.4329	13.261	0	0.896695	0	4.53102	5.02026	3.81096	6.22957	0.708979	0.156689	0.680167	SPDYE7P	speedy/RINGO cell cycle regulator family member E7, pseudogene [Source:HGNC Symbol;Acc:HGNC:35466]
ENSG00000090006	0	1.20554	0.930953	7.17356	1.0609	3.62481	2.33263	0.663951	4.00131	2.59132	0.156806	0.680167	LTBP4	latent transforming growth factor beta binding protein 4 [Source:HGNC Symbol;Acc:HGNC:6717]
ENSG00000184887	40.9678	31.3442	33.5143	26.9008	30.7661	29.9047	32.233	35.0827	29.3832	-0.255768	0.156882	0.680167	BTBD6	BTB domain containing 6 [Source:HGNC Symbol;Acc:HGNC:19897]
ENSG00000243176	321.073	131.404	51.2024	23.3141	151.709	57.0908	122.632	174.661	70.6031	-1.30676	0.156941	0.680167	AC092944.1	novel transcript
ENSG00000170409	19.0548	7.23327	9.30953	5.38017	13.7917	10.8744	10.9406	14.052	7.82929	-0.843823	0.1576	0.680167	AC091390.1	pseudogene similar to part of stromal antigen 3 STAG3
ENSG00000141376	1.90548	9.64436	6.51667	7.17356	0	5.43722	5.11288	2.80738	7.41838	1.40188	0.157613	0.680167	BCAS3	BCAS3 microtubule associated cell migration factor [Source:HGNC Symbol;Acc:HGNC:14347]
ENSG00000118495	0.952739	1.20554	0	1.79339	0	2.71861	1.11171	0.31758	1.90585	2.58524	0.157864	0.680167	PLAGL1	PLAG1 like zinc finger 1 [Source:HGNC Symbol;Acc:HGNC:9046]
ENSG00000124557	0.952739	1.20554	0	1.79339	0	2.71861	1.11171	0.31758	1.90585	2.58524	0.157864	0.680167	BTN1A1	butyrophilin subfamily 1 member A1 [Source:HGNC Symbol;Acc:HGNC:1135]
ENSG00000223598	45.7315	88.0048	33.5143	43.0414	26.5225	41.6853	46.4166	35.2561	57.5772	0.707623	0.157887	0.680167	AL138733.1	novel transcript, antisense to MTHFD1L
ENSG00000184408	0.952739	0	1.86191	1.79339	1.0609	0	0.944823	1.29185	0.597797	-1.11171	0.157908	0.680167	KCND2	potassium voltage-gated channel subfamily D member 2 [Source:HGNC Symbol;Acc:HGNC:6238]
ENSG00000232712	59.0698	51.8384	82.8548	80.7025	94.4202	79.7459	74.7719	78.7816	70.7623	-0.154878	0.158205	0.680167	KIZ-AS1	KIZ antisense RNA 1 [Source:HGNC Symbol;Acc:HGNC:51231]
ENSG00000166333	107.66	89.2103	136.85	135.401	168.683	146.805	130.768	137.731	123.805	-0.153779	0.158282	0.680167	ILK	integrin linked kinase [Source:HGNC Symbol;Acc:HGNC:6040]
ENSG00000078808	0.952739	1.20554	0	1.79339	0	0.906203	0.809646	0.31758	1.30171	2.03522	0.158314	0.680167	SDF4	stromal cell derived factor 4 [Source:HGNC Symbol;Acc:HGNC:24188]
ENSG00000095370	0.952739	1.20554	0	1.79339	0	0.906203	0.809646	0.31758	1.30171	2.03522	0.158314	0.680167	SH2D3C	SH2 domain containing 3C [Source:HGNC Symbol;Acc:HGNC:16884]
ENSG00000100678	0.952739	1.20554	0	1.79339	0	0.906203	0.809646	0.31758	1.30171	2.03522	0.158314	0.680167	SLC8A3	solute carrier family 8 member A3 [Source:HGNC Symbol;Acc:HGNC:11070]
ENSG00000164418	0.952739	1.20554	0	1.79339	0	0.906203	0.809646	0.31758	1.30171	2.03522	0.158314	0.680167	GRIK2	glutamate ionotropic receptor kainate type subunit 2 [Source:HGNC Symbol;Acc:HGNC:4580]
ENSG00000204681	0.952739	1.20554	0	1.79339	0	0.906203	0.809646	0.31758	1.30171	2.03522	0.158314	0.680167	GABBR1	gamma-aminobutyric acid type B receptor subunit 1 [Source:HGNC Symbol;Acc:HGNC:4070]
ENSG00000238755	0.952739	1.20554	0	1.79339	0	0.906203	0.809646	0.31758	1.30171	2.03522	0.158314	0.680167	LINC02006	long intergenic non-protein coding RNA 2006 [Source:HGNC Symbol;Acc:HGNC:52842]
ENSG00000115840	198.17	272.453	197.362	271.699	160.196	164.929	210.801	185.243	236.36	0.351571	0.158354	0.680167	SLC25A12	solute carrier family 25 member 12 [Source:HGNC Symbol;Acc:HGNC:10982]
ENSG00000142530	7.62191	7.23327	10.2405	4.48347	13.7917	9.06203	8.73881	10.5514	6.92626	-0.607282	0.158422	0.680167	FAM71E1	family with sequence similarity 71 member E1 [Source:HGNC Symbol;Acc:HGNC:25107]
ENSG00000197798	20.9603	25.3164	19.55	31.3843	12.7308	38.9667	24.8181	17.747	31.8892	0.845489	0.15852	0.680167	FAM118B	family with sequence similarity 118 member B [Source:HGNC Symbol;Acc:HGNC:26110]
ENSG00000187514	14.2911	16.8776	9.30953	20.624	19.0962	39.8729	20.0119	14.2323	25.7915	0.85773	0.158729	0.680167	PTMA	prothymosin alpha [Source:HGNC Symbol;Acc:HGNC:9623]
ENSG00000223374	6.66917	12.0554	9.30953	9.86364	8.48721	11.7806	9.69427	8.1553	11.2332	0.461964	0.158812	0.680167	AC005104.1	novel transcript
ENSG00000064201	0.952739	9.64436	0.930953	6.27686	6.3654	7.24963	5.23666	2.7497	7.72362	1.49	0.158873	0.680167	TSPAN32	tetraspanin 32 [Source:HGNC Symbol;Acc:HGNC:13410]
ENSG00000258558	35.2513	73.5382	26.9976	55.5951	48.8014	51.6536	48.6395	37.0168	60.2623	0.703075	0.158977	0.680167	AL121852.1	novel transcript, antisense to SCFD1
ENSG00000050344	163.871	128.993	165.71	152.438	203.693	125.056	156.627	177.758	135.496	-0.391666	0.159029	0.680167	NFE2L3	nuclear factor, erythroid 2 like 3 [Source:HGNC Symbol;Acc:HGNC:7783]
ENSG00000225057	109.565	113.321	57.7191	108.5	78.5067	137.743	100.892	81.9302	119.855	0.548819	0.159083	0.680167	AC012485.1	novel transcript
ENSG00000157107	3.81096	0	1.86191	0.896695	2.1218	0.906203	1.59959	2.59822	0.600966	-2.11217	0.159319	0.680167	FCHO2	FCH and mu domain containing endocytic adaptor 2 [Source:HGNC Symbol;Acc:HGNC:25180]
ENSG00000100028	21.913	20.4943	26.9976	10.7603	37.1315	26.2799	23.9294	28.6807	19.1782	-0.580617	0.15945	0.680167	SNRPD3	small nuclear ribonucleoprotein D3 polypeptide [Source:HGNC Symbol;Acc:HGNC:11160]
ENSG00000248180	2.85822	4.82218	4.65477	7.17356	2.1218	9.96823	5.26646	3.21159	7.32132	1.18881	0.15975	0.680167	GAPDHP60	glyceraldehyde-3-phosphate dehydrogenase pseudogene 60 [Source:HGNC Symbol;Acc:HGNC:4153]
ENSG00000265749	1368.13	2817.36	1813.5	3303.42	1124.55	1212.5	1939.91	1435.39	2444.43	0.768049	0.159905	0.680167	AC135178.4	novel transcript, antisense to KRBA2 and RPL26
ENSG00000259418	14.2911	32.5497	13.9643	32.281	36.0706	37.1543	27.7185	21.442	33.995	0.664884	0.160049	0.680167	AC091117.3	novel transcript, antisense to SORD
ENSG00000144645	17.1493	54.2495	86.5786	125.537	40.3142	42.5915	61.0701	48.0141	74.1261	0.626525	0.160059	0.680167	OSBPL10	oxysterol binding protein like 10 [Source:HGNC Symbol;Acc:HGNC:16395]
ENSG00000151503	53.3534	75.9493	54.9262	60.0786	45.6187	53.466	57.232	51.2995	63.1646	0.300173	0.160097	0.680167	NCAPD3	non-SMC condensin II complex subunit D3 [Source:HGNC Symbol;Acc:HGNC:28952]
ENSG00000102103	8.57465	7.23327	22.3429	6.27686	27.5834	7.24963	13.2101	19.5003	6.91992	-1.49467	0.160298	0.680167	PQBP1	polyglutamine binding protein 1 [Source:HGNC Symbol;Acc:HGNC:9330]
ENSG00000126698	3.81096	3.61663	2.79286	0	2.1218	0	2.05704	2.90854	1.20554	-1.27061	0.160311	0.680167	DNAJC8	DnaJ heat shock protein family (Hsp40) member C8 [Source:HGNC Symbol;Acc:HGNC:15470]
ENSG00000086712	2.85822	2.41109	2.79286	1.79339	4.2436	1.81241	2.65193	3.29823	2.00563	-0.717636	0.160343	0.680167	TXLNG	taxilin gamma [Source:HGNC Symbol;Acc:HGNC:18578]
ENSG00000166526	54.3061	42.1941	46.5477	37.6612	37.1315	36.2481	42.3481	45.9951	38.7011	-0.249105	0.160468	0.680167	ZNF3	zinc finger protein 3 [Source:HGNC Symbol;Acc:HGNC:13089]
ENSG00000065911	1.90548	3.61663	0	4.48347	0	0.906203	1.81863	0.635159	3.0021	2.24078	0.160545	0.680167	MTHFD2	methylenetetrahydrofolate dehydrogenase (NADP+ dependent) 2, methenyltetrahydrofolate cyclohydrolase [Source:HGNC Symbol;Acc:HGNC:7434]
ENSG00000223828	0	1.20554	0.930953	1.79339	0	3.62481	1.25912	0.310318	2.20792	2.83087	0.160727	0.680167	BANF1P4	barrier to autointegration factor 1 pseudogene 4 [Source:HGNC Symbol;Acc:HGNC:43884]
ENSG00000011105	7.62191	31.3442	13.9643	35.8678	3.1827	4.53102	16.0853	8.2563	23.9143	1.53431	0.160773	0.680167	TSPAN9	tetraspanin 9 [Source:HGNC Symbol;Acc:HGNC:21640]
ENSG00000170234	56.2116	61.4828	53.0643	78.9091	57.2886	67.059	62.3359	55.5215	69.1503	0.316689	0.160782	0.680167	PWWP2A	PWWP domain containing 2A [Source:HGNC Symbol;Acc:HGNC:29406]
ENSG00000270510	13.3383	42.1941	8.37858	41.248	18.0353	19.9365	23.8551	13.2507	34.4595	1.37883	0.160921	0.680167	AP000811.1	coiled-coil domain containing 90B (CCDC90B) pseudogene
ENSG00000253358	107.66	103.677	95.8882	75.3224	123.064	86.9955	98.7678	108.871	88.6649	-0.296181	0.160947	0.680167	AC087439.1	novel transcript
ENSG00000259670	100.038	60.2772	148.952	137.194	85.933	75.2149	101.268	111.641	90.8955	-0.296587	0.160958	0.680167	AC012379.1	novel transcript, antisense to CEP152
ENSG00000006016	1953.12	3223.63	2273.39	2888.25	1848.09	2030.8	2369.55	2024.86	2714.23	0.422717	0.161067	0.680167	CRLF1	cytokine receptor like factor 1 [Source:HGNC Symbol;Acc:HGNC:2364]
ENSG00000071909	13.3383	3.61663	2.79286	1.79339	8.48721	2.71861	5.45784	8.20614	2.70954	-1.59865	0.161086	0.680167	MYO3B	myosin IIIB [Source:HGNC Symbol;Acc:HGNC:15576]
ENSG00000167552	20.0075	3.61663	14.8952	7.17356	10.609	8.15583	10.743	15.1706	6.31534	-1.26435	0.161137	0.680167	TUBA1A	tubulin alpha 1a [Source:HGNC Symbol;Acc:HGNC:20766]
ENSG00000169946	55.2589	51.8384	52.1334	10.7603	82.7503	29.9047	47.1077	63.3808	30.8345	-1.0395	0.161154	0.680167	ZFPM2	zinc finger protein, FOG family member 2 [Source:HGNC Symbol;Acc:HGNC:16700]
ENSG00000127980	73.3609	75.9493	80.062	85.186	63.654	64.3404	73.7588	72.359	75.1586	0.0547659	0.161293	0.680167	PEX1	peroxisomal biogenesis factor 1 [Source:HGNC Symbol;Acc:HGNC:8850]
ENSG00000198556	288.68	224.231	272.769	248.384	398.899	251.924	280.815	320.116	241.513	-0.406491	0.161294	0.680167	ZNF789	zinc finger protein 789 [Source:HGNC Symbol;Acc:HGNC:27801]
ENSG00000115944	2.85822	1.20554	1.86191	0.896695	6.3654	1.81241	2.50003	3.69518	1.30488	-1.50172	0.161735	0.680167	COX7A2L	cytochrome c oxidase subunit 7A2 like [Source:HGNC Symbol;Acc:HGNC:2289]
ENSG00000173786	96.2266	125.377	84.7167	94.153	100.786	107.838	101.516	93.9097	109.123	0.216604	0.161922	0.680167	CNP	2',3'-cyclic nucleotide 3' phosphodiesterase [Source:HGNC Symbol;Acc:HGNC:2158]
ENSG00000163975	3.81096	1.20554	4.65477	1.79339	1.0609	0.906203	2.23863	3.17554	1.30171	-1.28659	0.161987	0.680167	MELTF	melanotransferrin [Source:HGNC Symbol;Acc:HGNC:7037]
ENSG00000123338	6.66917	0	1.86191	0.896695	3.1827	0	2.10175	3.90459	0.298898	-3.70745	0.161988	0.680167	NCKAP1L	NCK associated protein 1 like [Source:HGNC Symbol;Acc:HGNC:4862]
ENSG00000185090	2.85822	2.41109	0.930953	0.896695	2.1218	1.81241	1.83853	1.97032	1.70673	-0.207198	0.161993	0.680167	MANEAL	mannosidase endo-alpha like [Source:HGNC Symbol;Acc:HGNC:26452]
ENSG00000147224	3.81096	13.261	5.58572	9.86364	8.48721	9.96823	8.49612	5.96129	11.031	0.88786	0.162	0.680167	PRPS1	phosphoribosyl pyrophosphate synthetase 1 [Source:HGNC Symbol;Acc:HGNC:9462]
ENSG00000164175	5.71643	0	1.86191	0	3.1827	1.81241	2.09557	3.58701	0.604135	-2.56984	0.162126	0.680167	SLC45A2	solute carrier family 45 member 2 [Source:HGNC Symbol;Acc:HGNC:16472]
ENSG00000267349	8.57465	16.8776	8.37858	8.96695	5.3045	15.4055	10.5846	7.41924	13.75	0.890088	0.16224	0.680167	AC015911.5	novel transcript
ENSG00000139651	60.0226	79.5659	62.3739	70.8389	41.3751	88.8079	67.164	54.5905	79.7376	0.54661	0.162302	0.680167	ZNF740	zinc finger protein 740 [Source:HGNC Symbol;Acc:HGNC:27465]
ENSG00000263307	750.758	1058.47	726.143	877.864	637.601	679.652	788.415	704.834	871.995	0.307035	0.162355	0.680167	AC007216.4	novel transcript, antisense to GSPT1
ENSG00000235106	14.2911	18.0832	17.6881	18.8306	13.7917	21.7489	17.4056	15.257	19.5542	0.358011	0.162601	0.680167	BRD3OS	BRD3 opposite strand [Source:HGNC Symbol;Acc:HGNC:24742]
ENSG00000183439	2.85822	1.20554	8.37858	3.58678	10.609	0	4.43969	7.28193	1.59744	-2.18856	0.162606	0.680167	TRIM61	tripartite motif containing 61 [Source:HGNC Symbol;Acc:HGNC:24339]
ENSG00000114450	4.7637	8.43881	3.72381	4.48347	3.1827	4.53102	4.85392	3.89007	5.81777	0.580669	0.162702	0.680167	GNB4	G protein subunit beta 4 [Source:HGNC Symbol;Acc:HGNC:20731]
ENSG00000179428	131.478	102.471	475.717	24.2108	544.242	13.593	215.285	383.812	46.7584	-3.0371	0.16283	0.680167	IL6-AS1	IL6 antisense RNA 1 [Source:HGNC Symbol;Acc:HGNC:40301]
ENSG00000226849	239.138	243.52	235.531	313.843	210.058	295.422	256.252	228.242	284.262	0.316654	0.163017	0.680167	AL109811.1	novel transcript
ENSG00000160299	15.2438	18.0832	12.1024	15.2438	7.42631	18.1241	14.3706	11.5908	17.1503	0.565253	0.163052	0.680167	PCNT	pericentrin [Source:HGNC Symbol;Acc:HGNC:16068]
ENSG00000250267	3.81096	0	5.58572	3.58678	3.1827	2.71861	3.14746	4.19313	2.1018	-0.996403	0.163123	0.680167	AC021237.1	novel transcript
ENSG00000233175	720.271	292.947	259.736	148.851	1109.7	260.08	465.265	696.57	233.96	-1.57401	0.163149	0.680167	AC008105.1	novel transcript, antisense to FMNL1
ENSG00000158545	12.3856	9.64436	24.2048	13.4504	27.5834	6.34342	15.602	21.3913	9.81273	-1.1243	0.163161	0.680167	ZC3H18	zinc finger CCCH-type containing 18 [Source:HGNC Symbol;Acc:HGNC:25091]
ENSG00000241357	38.1096	37.3719	40.9619	27.7975	56.2277	41.6853	40.359	45.0997	35.6183	-0.340502	0.163391	0.680167	AC092849.1	novel transcript
ENSG00000249188	12.3856	10.8499	39.1	14.3471	23.3398	4.53102	17.4256	24.9418	9.90934	-1.33171	0.1635	0.680167	ENPP7P1	ectonucleotide pyrophosphatase/phosphodiesterase 7 pseudogene 1 [Source:HGNC Symbol;Acc:HGNC:48699]
ENSG00000189223	23.8185	1.20554	4.65477	1.79339	16.9744	5.43722	8.98063	15.1492	2.81205	-2.42955	0.163551	0.680167	PAX8-AS1	PAX8 antisense RNA 1 [Source:HGNC Symbol;Acc:HGNC:49271]
ENSG00000178074	76.2191	75.9493	90.3024	86.9794	101.846	99.6823	88.4965	89.456	87.537	-0.0312853	0.163778	0.680167	C2orf69	chromosome 2 open reading frame 69 [Source:HGNC Symbol;Acc:HGNC:26799]
ENSG00000162894	2.85822	2.41109	2.79286	1.79339	1.0609	0.906203	1.97044	2.23733	1.70356	-0.393222	0.163946	0.680167	FCMR	Fc fragment of IgM receptor [Source:HGNC Symbol;Acc:HGNC:14315]
ENSG00000243055	1558.68	524.412	1457.87	537.12	3952.92	439.509	1411.75	2323.16	500.347	-2.21509	0.163976	0.680167	GK-AS1	GK antisense RNA 1 [Source:HGNC Symbol;Acc:HGNC:40255]
ENSG00000238133	371.568	514.768	369.588	598.992	316.148	336.201	417.878	352.435	483.32	0.455622	0.163999	0.680167	MAP3K20-AS1	MAP3K20 antisense RNA 1 [Source:HGNC Symbol;Acc:HGNC:27935]
ENSG00000254862	5.71643	4.82218	19.55	11.657	10.609	6.34342	9.78301	11.9585	7.60754	-0.652532	0.164177	0.680167	LGR4-AS1	LGR4 antisense RNA 1 [Source:HGNC Symbol;Acc:HGNC:40629]
ENSG00000238460	1.90548	3.61663	1.86191	8.96695	3.1827	5.43722	4.16181	2.3167	6.00693	1.37456	0.164272	0.680167	NA	NA
ENSG00000160097	2.85822	4.82218	2.79286	5.38017	0	8.15583	4.00154	1.88369	6.11939	1.69983	0.164308	0.680167	FNDC5	fibronectin type III domain containing 5 [Source:HGNC Symbol;Acc:HGNC:20240]
ENSG00000148950	19.0548	9.64436	12.1024	11.657	11.6699	2.71861	11.1412	14.2757	8.00667	-0.834287	0.164452	0.680167	IMMP1L	inner mitochondrial membrane peptidase subunit 1 [Source:HGNC Symbol;Acc:HGNC:26317]
ENSG00000234199	0.952739	1.20554	0.930953	1.79339	0	1.81241	1.11584	0.627897	1.60378	1.35288	0.164469	0.680167	LINC01191	long intergenic non-protein coding RNA 1191 [Source:HGNC Symbol;Acc:HGNC:49595]
ENSG00000107949	157.202	212.176	172.226	180.236	117.76	143.18	163.797	149.063	178.531	0.260251	0.164569	0.680167	BCCIP	BRCA2 and CDKN1A interacting protein [Source:HGNC Symbol;Acc:HGNC:978]
ENSG00000143786	0.952739	0	1.86191	1.79339	2.1218	0.906203	1.27267	1.64548	0.899864	-0.870731	0.164647	0.680167	CNIH3	cornichon family AMPA receptor auxiliary protein 3 [Source:HGNC Symbol;Acc:HGNC:26802]
ENSG00000146477	0.952739	0	1.86191	1.79339	2.1218	0.906203	1.27267	1.64548	0.899864	-0.870731	0.164647	0.680167	SLC22A3	solute carrier family 22 member 3 [Source:HGNC Symbol;Acc:HGNC:10967]
ENSG00000280678	44.7787	43.3996	28.8595	12.5537	39.2533	28.9985	32.9739	37.6305	28.3173	-0.410221	0.164703	0.680167	NA	NA
ENSG00000231969	32.3931	80.7715	49.3405	59.1819	15.9135	33.5295	45.1883	32.5491	57.8276	0.829143	0.164718	0.680167	MMADHC-DT	MMADHC divergent transcript [Source:HGNC Symbol;Acc:HGNC:41087]
ENSG00000270975	2.85822	2.41109	5.58572	1.79339	8.48721	2.71861	3.97571	5.64371	2.3077	-1.29019	0.164763	0.680167	MAGOH3P	mago homolog 3, pseudogene [Source:HGNC Symbol;Acc:HGNC:20020]
ENSG00000167699	2.85822	14.4665	13.0333	17.9339	11.6699	13.593	12.2592	9.18716	15.3312	0.738777	0.165109	0.680167	GLOD4	glyoxalase domain containing 4 [Source:HGNC Symbol;Acc:HGNC:14111]
ENSG00000108950	270.578	231.465	161.055	141.678	240.824	138.649	197.375	224.152	170.597	-0.393887	0.165138	0.680167	FAM20A	FAM20A golgi associated secretory pathway pseudokinase [Source:HGNC Symbol;Acc:HGNC:23015]
ENSG00000255692	21.913	22.9053	13.0333	32.281	28.6443	44.404	27.1968	21.1969	33.1968	0.64719	0.165159	0.680167	AC002563.1	novel transcript, antisense to CIT
ENSG00000159596	5.71643	1.20554	8.37858	1.79339	3.1827	2.71861	3.83254	5.75924	1.90585	-1.59544	0.165248	0.680167	TMEM69	transmembrane protein 69 [Source:HGNC Symbol;Acc:HGNC:28035]
ENSG00000170889	3303.15	585.895	1845.15	674.315	7774.28	1068.41	2541.87	4307.53	776.208	-2.47234	0.165517	0.680167	RPS9	ribosomal protein S9 [Source:HGNC Symbol;Acc:HGNC:10442]
ENSG00000167394	1.90548	0	3.72381	0.896695	8.48721	0	2.5022	4.7055	0.298898	-3.97662	0.165521	0.680167	ZNF668	zinc finger protein 668 [Source:HGNC Symbol;Acc:HGNC:25821]
ENSG00000258365	130.525	79.5659	134.057	46.6281	304.479	57.997	125.542	189.687	61.397	-1.62738	0.166044	0.680167	AC073655.2	novel transcript, antisense to PLXNC1
ENSG00000272540	1515.81	1973.48	1597.52	1617.64	1558.46	2022.65	1714.26	1557.26	1871.25	0.264993	0.166099	0.680167	AL662797.2	novel transcript, antisense to TUBB
ENSG00000087157	3.81096	0	4.65477	0.896695	13.7917	0	3.85902	7.41914	0.298898	-4.63353	0.166368	0.680167	PGS1	phosphatidylglycerophosphate synthase 1 [Source:HGNC Symbol;Acc:HGNC:30029]
ENSG00000104805	0.952739	0	3.72381	0.896695	4.2436	3.62481	2.24028	2.97338	1.50717	-0.980265	0.166493	0.680167	NUCB1	nucleobindin 1 [Source:HGNC Symbol;Acc:HGNC:8043]
ENSG00000269646	7.62191	2.41109	1.86191	0	1.0609	0	2.1593	3.51491	0.803696	-2.12876	0.166536	0.680167	AC010487.1	novel transcript
ENSG00000118322	39.0623	20.4943	13.9643	1.79339	3.1827	1.81241	13.3849	18.7364	8.03335	-1.22177	0.166582	0.680167	ATP10B	ATPase phospholipid transporting 10B (putative) [Source:HGNC Symbol;Acc:HGNC:13543]
ENSG00000170289	106.707	305.003	197.362	360.471	135.795	144.993	208.388	146.621	270.156	0.881695	0.167199	0.680167	CNGB3	cyclic nucleotide gated channel subunit beta 3 [Source:HGNC Symbol;Acc:HGNC:2153]
ENSG00000187741	788.868	289.331	409.619	255.558	1516.03	425.915	614.22	904.838	323.601	-1.48344	0.167284	0.680167	FANCA	FA complementation group A [Source:HGNC Symbol;Acc:HGNC:3582]
ENSG00000088053	139.1	56.6606	23.2738	19.7273	107.151	19.0303	60.8238	89.8416	31.806	-1.49808	0.167347	0.680167	GP6	glycoprotein VI platelet [Source:HGNC Symbol;Acc:HGNC:14388]
ENSG00000138119	0	1.20554	0	1.79339	0	5.43722	1.40603	0	2.81205	NA	0.167543	0.680167	MYOF	myoferlin [Source:HGNC Symbol;Acc:HGNC:3656]
ENSG00000258344	87.652	55.4551	50.2715	21.5207	187.779	76.1211	79.7999	108.568	51.0323	-1.08911	0.167547	0.680167	AC078778.1	novel transcript, sense overlapping to COPZ1 & HNRNPA1
ENSG00000104517	2.85822	0	3.72381	3.58678	3.1827	0.906203	2.37629	3.25491	1.49766	-1.11991	0.167627	0.680167	UBR5	ubiquitin protein ligase E3 component n-recognin 5 [Source:HGNC Symbol;Acc:HGNC:16806]
ENSG00000162613	4.7637	1.20554	3.72381	0.896695	11.6699	0	3.70994	6.71914	0.700746	-3.26131	0.167637	0.680167	FUBP1	far upstream element binding protein 1 [Source:HGNC Symbol;Acc:HGNC:4004]
ENSG00000267265	16.1966	24.1109	8.37858	33.1777	10.609	16.3117	18.1307	11.728	24.5334	1.06479	0.167706	0.680167	AC011476.3	novel transcript, antisense to RDH13 and GP6
ENSG00000230183	1.90548	4.82218	5.58572	6.27686	0	0.906203	3.24941	2.49707	4.00175	0.680397	0.16774	0.680167	CNOT6LP1	CNOT6L pseudogene 1 [Source:HGNC Symbol;Acc:HGNC:32355]
ENSG00000105819	463.984	514.768	419.86	538.914	419.056	437.696	465.713	434.3	497.126	0.194919	0.167857	0.680167	PMPCB	peptidase, mitochondrial processing beta subunit [Source:HGNC Symbol;Acc:HGNC:9119]
ENSG00000164307	666.917	1185.05	885.336	1749.45	687.464	761.211	989.238	746.572	1231.9	0.722536	0.167906	0.680167	ERAP1	endoplasmic reticulum aminopeptidase 1 [Source:HGNC Symbol;Acc:HGNC:18173]
ENSG00000182359	20.9603	19.2887	21.4119	12.5537	24.4007	8.15583	17.7952	22.2576	13.3328	-0.739325	0.167942	0.680167	KBTBD3	kelch repeat and BTB domain containing 3 [Source:HGNC Symbol;Acc:HGNC:22934]
ENSG00000238018	822.214	1152.5	570.674	799.852	567.582	588.126	750.158	653.49	846.826	0.373901	0.168101	0.680167	AC093110.1	novel transcript, antisense to SPTBN1
ENSG00000100632	7.62191	0	6.51667	5.38017	4.2436	0.906203	4.11143	6.1274	2.09546	-1.54801	0.168413	0.680167	ERH	ERH mRNA splicing and mitosis factor [Source:HGNC Symbol;Acc:HGNC:3447]
ENSG00000248115	0.952739	3.61663	0.930953	1.79339	2.1218	2.71861	2.02235	1.33516	2.70954	1.02103	0.168508	0.680167	AC023154.1	novel transcript
ENSG00000102053	0	1.20554	0.930953	4.48347	1.0609	1.81241	1.58221	0.663951	2.50048	1.91305	0.168602	0.680167	ZC3H12B	zinc finger CCCH-type containing 12B [Source:HGNC Symbol;Acc:HGNC:17407]
ENSG00000108641	12.3856	20.4943	13.0333	15.2438	7.42631	24.4675	15.5085	10.9484	20.0685	0.874212	0.16865	0.680167	B9D1	B9 domain containing 1 [Source:HGNC Symbol;Acc:HGNC:24123]
ENSG00000220739	0	3.61663	2.79286	6.27686	5.3045	5.43722	3.90468	2.69912	5.11024	0.920901	0.168678	0.680167	AL513475.2	5'-nucleotidase domain containing 1 (NT5DC1) pseudogene
ENSG00000263818	2032.19	2202.53	908.61	1278.69	1359.01	2315.35	1682.73	1433.27	1932.19	0.430923	0.168684	0.680167	RDM1P5	RDM1 pseudogene 5 [Source:HGNC Symbol;Acc:HGNC:53921]
ENSG00000160401	56.2116	55.4551	56.7881	37.6612	60.4713	39.8729	51.0767	57.8237	44.3297	-0.383386	0.168825	0.680167	CFAP157	cilia and flagella associated protein 157 [Source:HGNC Symbol;Acc:HGNC:27843]
ENSG00000267757	7.62191	4.82218	2.79286	2.69008	5.3045	2.71861	4.32502	5.23976	3.41029	-0.619606	0.168879	0.680167	EML2-AS1	EML2 antisense RNA 1 [Source:HGNC Symbol;Acc:HGNC:48331]
ENSG00000177697	2.85822	1.20554	1.86191	1.79339	3.1827	1.81241	2.11903	2.63428	1.60378	-0.71593	0.16904	0.680167	CD151	CD151 molecule (Raph blood group) [Source:HGNC Symbol;Acc:HGNC:1630]
ENSG00000105617	25.724	15.6721	32.5834	16.1405	27.5834	26.2799	23.9972	28.6302	19.3642	-0.564151	0.169116	0.680167	LENG1	leukocyte receptor cluster member 1 [Source:HGNC Symbol;Acc:HGNC:15502]
ENSG00000244558	26.6767	54.2495	45.6167	78.0125	73.2022	183.959	76.9528	48.4985	105.407	1.11996	0.169222	0.680167	KCNK15-AS1	KCNK15 and WISP2 antisense RNA 1 [Source:HGNC Symbol;Acc:HGNC:49901]
ENSG00000099139	3.81096	2.41109	1.86191	1.79339	1.0609	0	1.82304	2.24459	1.40149	-0.679486	0.169252	0.680167	PCSK5	proprotein convertase subtilisin/kexin type 5 [Source:HGNC Symbol;Acc:HGNC:8747]
ENSG00000166387	0.952739	0	3.72381	0	1.0609	0	0.956242	1.91248	0	NA	0.16927	0.680167	PPFIBP2	PPFIA binding protein 2 [Source:HGNC Symbol;Acc:HGNC:9250]
ENSG00000074842	9.52739	18.0832	11.1714	11.657	6.3654	17.2179	12.337	9.02141	15.6527	0.794985	0.169386	0.680167	MYDGF	myeloid derived growth factor [Source:HGNC Symbol;Acc:HGNC:16948]
ENSG00000245025	177.209	198.915	121.024	155.128	146.404	248.3	174.497	148.213	200.781	0.437954	0.169406	0.680167	AC107959.1	novel transcript, antisense to RHOBTB2
ENSG00000094963	0.952739	2.41109	4.65477	8.96695	0	0.906203	2.98196	1.86917	4.09475	1.13138	0.169478	0.680167	FMO2	flavin containing dimethylaniline monoxygenase 2 [Source:HGNC Symbol;Acc:HGNC:3770]
ENSG00000277632	18.102	14.4665	22.3429	15.2438	11.6699	10.8744	15.4499	17.3716	13.5283	-0.360755	0.169488	0.680167	CCL3	C-C motif chemokine ligand 3 [Source:HGNC Symbol;Acc:HGNC:10627]
ENSG00000147687	59.0698	124.171	80.9929	162.302	50.9232	54.3722	88.6385	63.662	113.615	0.835649	0.169799	0.680167	TATDN1	TatD DNase domain containing 1 [Source:HGNC Symbol;Acc:HGNC:24220]
ENSG00000224597	1347.17	1238.09	1188.83	911.939	1670.92	995.011	1225.33	1402.31	1048.35	-0.419684	0.169865	0.680167	SVIL-AS1	SVIL antisense RNA 1 [Source:HGNC Symbol;Acc:HGNC:51219]
ENSG00000261235	2.85822	7.23327	3.72381	12.5537	5.3045	6.34342	6.33616	3.96218	8.71014	1.1364	0.170075	0.680167	AC092142.1	novel transcript, antisense to HSD17B2
ENSG00000196230	31.4404	13.261	17.6881	8.96695	50.9232	2.71861	20.833	33.3506	8.31552	-2.00383	0.170132	0.680167	TUBB	tubulin beta class I [Source:HGNC Symbol;Acc:HGNC:20778]
ENSG00000138315	0	2.41109	0	5.38017	1.0609	1.81241	1.77743	0.353634	3.20122	3.1783	0.170148	0.680167	OIT3	oncoprotein induced transcript 3 [Source:HGNC Symbol;Acc:HGNC:29953]
ENSG00000153551	1.90548	0	1.86191	0.896695	10.609	5.43722	3.45172	4.79213	2.1113	-1.18253	0.170171	0.680167	CMTM7	CKLF like MARVEL transmembrane domain containing 7 [Source:HGNC Symbol;Acc:HGNC:19178]
ENSG00000227480	1.90548	1.20554	1.86191	1.79339	1.0609	0	1.30454	1.60943	0.999645	-0.687061	0.170218	0.680167	CCDC148-AS1	CCDC148 antisense RNA 1 [Source:HGNC Symbol;Acc:HGNC:44134]
ENSG00000233670	0	1.20554	0	3.58678	1.0609	1.81241	1.27761	0.353634	2.20158	2.63821	0.170335	0.680167	PIRT	phosphoinositide interacting regulator of transient receptor potential channels [Source:HGNC Symbol;Acc:HGNC:37239]
ENSG00000196876	9.52739	9.64436	7.44762	9.86364	6.3654	8.15583	8.50071	7.78014	9.22128	0.24517	0.170557	0.680167	SCN8A	sodium voltage-gated channel alpha subunit 8 [Source:HGNC Symbol;Acc:HGNC:10596]
ENSG00000166140	40.015	40.9885	29.7905	58.2852	32.8879	57.997	43.3274	34.2312	52.4236	0.614905	0.170601	0.680167	ZFYVE19	zinc finger FYVE-type containing 19 [Source:HGNC Symbol;Acc:HGNC:20758]
ENSG00000241438	0	4.82218	0.930953	2.69008	0	0.906203	1.55824	0.310318	2.80616	3.17678	0.170648	0.680167	TDGF1P6	teratocarcinoma-derived growth factor 1 pseudogene 6 [Source:HGNC Symbol;Acc:HGNC:11706]
ENSG00000136709	1.90548	0	2.79286	2.69008	4.2436	1.81241	2.24074	2.98065	1.50083	-0.989865	0.170687	0.680167	WDR33	WD repeat domain 33 [Source:HGNC Symbol;Acc:HGNC:25651]
ENSG00000203497	2.85822	10.8499	3.72381	12.5537	4.2436	4.53102	6.46005	3.60854	9.31155	1.3676	0.170823	0.680167	PDCD4-AS1	PDCD4 antisense RNA 1 [Source:HGNC Symbol;Acc:HGNC:27425]
ENSG00000158526	0.952739	0	4.65477	0.896695	1.0609	0	1.26085	2.2228	0.298898	-2.89465	0.170965	0.680167	TSR2	TSR2 ribosome maturation factor [Source:HGNC Symbol;Acc:HGNC:25455]
ENSG00000157827	11.4329	10.8499	15.8262	12.5537	8.48721	7.24963	11.0666	11.9154	10.2178	-0.221753	0.170979	0.680167	FMNL2	formin like 2 [Source:HGNC Symbol;Acc:HGNC:18267]
ENSG00000171861	18.102	13.261	85.6477	16.1405	64.715	20.8427	36.4515	56.1549	16.7481	-1.74542	0.171038	0.680167	MRM3	mitochondrial rRNA methyltransferase 3 [Source:HGNC Symbol;Acc:HGNC:18485]
ENSG00000013619	0.952739	0	0.930953	0.896695	1.0609	0	0.640215	0.981531	0.298898	-1.71538	0.171047	0.680167	MAMLD1	mastermind like domain containing 1 [Source:HGNC Symbol;Acc:HGNC:2568]
ENSG00000047849	0.952739	0	0.930953	0.896695	1.0609	0	0.640215	0.981531	0.298898	-1.71538	0.171047	0.680167	MAP4	microtubule associated protein 4 [Source:HGNC Symbol;Acc:HGNC:6862]
ENSG00000055070	0.952739	0	0.930953	0.896695	1.0609	0	0.640215	0.981531	0.298898	-1.71538	0.171047	0.680167	SZRD1	SUZ RNA binding domain containing 1 [Source:HGNC Symbol;Acc:HGNC:30232]
ENSG00000160767	0.952739	0	0.930953	0.896695	1.0609	0	0.640215	0.981531	0.298898	-1.71538	0.171047	0.680167	FAM189B	family with sequence similarity 189 member B [Source:HGNC Symbol;Acc:HGNC:1233]
ENSG00000177685	0.952739	0	0.930953	0.896695	1.0609	0	0.640215	0.981531	0.298898	-1.71538	0.171047	0.680167	CRACR2B	calcium release activated channel regulator 2B [Source:HGNC Symbol;Acc:HGNC:28703]
ENSG00000228340	0.952739	0	0.930953	0.896695	1.0609	0	0.640215	0.981531	0.298898	-1.71538	0.171047	0.680167	MIR646HG	MIR646 host gene [Source:HGNC Symbol;Acc:HGNC:27659]
ENSG00000116580	17.1493	30.1386	33.5143	34.0744	29.7052	45.3102	31.6487	26.7896	36.5077	0.446528	0.171287	0.680167	GON4L	gon-4 like [Source:HGNC Symbol;Acc:HGNC:25973]
ENSG00000197653	21.913	16.8776	23.2738	21.5207	25.4616	24.4675	22.2524	23.5495	20.9553	-0.168383	0.171544	0.680167	DNAH10	dynein axonemal heavy chain 10 [Source:HGNC Symbol;Acc:HGNC:2941]
ENSG00000229839	134.336	179.626	143.367	149.748	113.516	191.209	151.967	130.406	173.528	0.412151	0.171563	0.680167	AC018462.1	novel transcript
ENSG00000229431	293.444	291.742	280.217	239.418	353.28	304.484	293.764	308.98	278.548	-0.149589	0.171585	0.680167	MED8-AS1	MED8 antisense RNA 1 [Source:HGNC Symbol;Acc:HGNC:40908]
ENSG00000275741	70.5027	21.6998	36.3072	23.3141	120.943	17.2179	48.3307	75.9175	20.7439	-1.87175	0.171652	0.680167	AL162497.1	novel transcript, antisense to IRS2
ENSG00000234185	69.55	53.044	121.024	95.0497	67.8977	66.1528	78.7863	86.1572	71.4155	-0.270734	0.171656	0.680167	AC068533.3	novel transcript
ENSG00000243433	0	3.61663	1.86191	3.58678	3.1827	3.62481	2.64547	1.68154	3.60941	1.10198	0.171671	0.680167	AC010973.1	novel transcript
ENSG00000231851	18.102	27.7275	24.2048	45.7314	23.3398	26.2799	27.5642	21.8822	33.2463	0.603434	0.171697	0.680167	MRPS9-AS1	MRPS9 antisense RNA 1 [Source:HGNC Symbol;Acc:HGNC:40688]
ENSG00000128285	3.81096	2.41109	1.86191	0.896695	5.3045	0.906203	2.53189	3.65912	1.40466	-1.38127	0.171921	0.680167	MCHR1	melanin concentrating hormone receptor 1 [Source:HGNC Symbol;Acc:HGNC:4479]
ENSG00000227110	429.685	407.474	1008.22	278.872	1020.59	245.581	565.07	819.498	310.642	-1.39949	0.17201	0.680167	LMCD1-AS1	LMCD1 antisense RNA 1 [Source:HGNC Symbol;Acc:HGNC:44477]
ENSG00000232878	401.103	386.98	512.024	385.579	548.486	345.263	429.906	487.204	372.607	-0.386871	0.172156	0.680167	DPYD-AS1	DPYD antisense RNA 1 [Source:HGNC Symbol;Acc:HGNC:40195]
ENSG00000108106	3.81096	8.43881	5.58572	6.27686	5.3045	7.24963	6.11108	4.90039	7.32177	0.579294	0.172363	0.680167	UBE2S	ubiquitin conjugating enzyme E2 S [Source:HGNC Symbol;Acc:HGNC:17895]
ENSG00000236756	320.12	356.841	333.281	364.955	218.546	347.076	323.47	290.649	356.291	0.293776	0.172373	0.680167	DNAJC9-AS1	DNAJC9 antisense RNA 1 [Source:HGNC Symbol;Acc:HGNC:31432]
ENSG00000280039	130.525	94.0325	126.61	79.8058	86.9939	85.1831	100.525	114.71	86.3405	-0.409877	0.172458	0.680167	RN7SKP23	RN7SK pseudogene 23 [Source:HGNC Symbol;Acc:HGNC:45747]
ENSG00000133422	0	4.82218	1.86191	3.58678	0	0.906203	1.86284	0.620635	3.10505	2.3228	0.172623	0.680167	MORC2	MORC family CW-type zinc finger 2 [Source:HGNC Symbol;Acc:HGNC:23573]
ENSG00000167360	0.952739	0	5.58572	1.79339	1.0609	0	1.56546	2.53312	0.597797	-2.08319	0.172641	0.680167	OR51Q1	olfactory receptor family 51 subfamily Q member 1 (gene/pseudogene) [Source:HGNC Symbol;Acc:HGNC:14851]
ENSG00000225793	0.952739	0	5.58572	1.79339	1.0609	0	1.56546	2.53312	0.597797	-2.08319	0.172641	0.680167	AL080250.1	novel transcript
ENSG00000204618	19.0548	9.64436	8.37858	8.07025	28.6443	20.8427	15.7725	18.6926	12.8524	-0.540423	0.172747	0.680167	RNF39	ring finger protein 39 [Source:HGNC Symbol;Acc:HGNC:18064]
ENSG00000108932	3.81096	3.61663	5.58572	3.58678	1.0609	0	2.9435	3.48586	2.40114	-0.537796	0.17283	0.680167	SLC16A6	solute carrier family 16 member 6 [Source:HGNC Symbol;Acc:HGNC:10927]
ENSG00000117009	82.8883	50.6329	46.5477	31.3843	51.9841	48.0288	51.911	60.4734	43.3487	-0.480313	0.172885	0.680167	KMO	kynurenine 3-monooxygenase [Source:HGNC Symbol;Acc:HGNC:6381]
ENSG00000169136	6.66917	1.20554	5.58572	5.38017	7.42631	0.906203	4.52885	6.5604	2.49731	-1.39341	0.172949	0.680167	ATF5	activating transcription factor 5 [Source:HGNC Symbol;Acc:HGNC:790]
ENSG00000180658	5.71643	6.02772	0.930953	8.96695	1.0609	7.24963	4.9921	2.56943	7.41477	1.52895	0.172973	0.680167	OR2A4	olfactory receptor family 2 subfamily A member 4 [Source:HGNC Symbol;Acc:HGNC:14729]
ENSG00000260097	1508.19	817.359	967.26	875.174	878.426	569.096	935.917	1117.96	753.876	-0.568465	0.172975	0.680167	SPDYE6	speedy/RINGO cell cycle regulator family member E6 [Source:HGNC Symbol;Acc:HGNC:35465]
ENSG00000232725	256.287	162.749	196.431	154.232	227.033	214.77	201.917	226.584	177.25	-0.354257	0.173191	0.680167	U52111.1	novel transcript
ENSG00000224721	118.14	75.9493	104.267	66.3554	100.786	99.6823	94.1965	107.731	80.6624	-0.417461	0.173593	0.680167	AC007182.1	novel transcript, antisense to FLVCR2
ENSG00000159063	0.952739	0	5.58572	0	2.1218	0	1.44338	2.88675	0	NA	0.173638	0.680167	ALG8	ALG8 alpha-1,3-glucosyltransferase [Source:HGNC Symbol;Acc:HGNC:23161]
ENSG00000110944	3.81096	1.20554	2.79286	2.69008	9.54811	6.34342	4.3985	5.38397	3.41302	-0.657624	0.173701	0.680167	IL23A	interleukin 23 subunit alpha [Source:HGNC Symbol;Acc:HGNC:15488]
ENSG00000166004	14.2911	14.4665	16.7572	24.2108	10.609	18.1241	16.4098	13.8857	18.9338	0.447358	0.174054	0.680167	CEP295	centrosomal protein 295 [Source:HGNC Symbol;Acc:HGNC:29366]
ENSG00000188186	56.2116	40.9885	51.2024	48.4215	67.8977	38.9667	50.6147	58.4372	42.7923	-0.449538	0.174088	0.680167	LAMTOR4	late endosomal/lysosomal adaptor, MAPK and MTOR activator 4 [Source:HGNC Symbol;Acc:HGNC:33772]
ENSG00000264779	5.71643	0	2.79286	1.79339	2.1218	0	2.07075	3.5437	0.597797	-2.56753	0.174211	0.680167	NA	NA
ENSG00000108819	0.952739	1.20554	0	2.69008	2.1218	6.34342	2.21893	1.02485	3.41302	1.73564	0.174734	0.680167	PPP1R9B	protein phosphatase 1 regulatory subunit 9B [Source:HGNC Symbol;Acc:HGNC:9298]
ENSG00000255139	114.329	113.321	117.3	94.153	117.76	87.9017	107.461	116.463	98.4586	-0.242281	0.174867	0.680167	AP000442.1	novel transcript
ENSG00000225921	268.672	261.603	270.907	219.69	300.235	278.204	266.552	279.938	253.166	-0.145025	0.174903	0.680167	NOL7	nucleolar protein 7 [Source:HGNC Symbol;Acc:HGNC:21040]
ENSG00000106809	41.9205	15.6721	60.5119	40.3513	43.4969	42.5915	40.7574	48.6431	32.8716	-0.565393	0.174954	0.680167	OGN	osteoglycin [Source:HGNC Symbol;Acc:HGNC:8126]
ENSG00000231367	49.5424	50.6329	65.1667	78.9091	44.5578	65.2466	59.0093	53.089	64.9295	0.290462	0.175076	0.680167	LINC02613	long intergenic non-protein coding RNA 2613 [Source:HGNC Symbol;Acc:HGNC:54068]
ENSG00000214413	5.71643	7.23327	10.2405	18.8306	9.54811	12.6868	10.7093	8.50168	12.9169	0.603441	0.175084	0.680167	BBIP1	BBSome interacting protein 1 [Source:HGNC Symbol;Acc:HGNC:28093]
ENSG00000133943	0.952739	6.02772	3.72381	5.38017	5.3045	6.34342	4.62206	3.32702	5.9171	0.830662	0.175125	0.680167	DGLUCY	D-glutamate cyclase [Source:HGNC Symbol;Acc:HGNC:20498]
ENSG00000222047	1272.86	1112.72	1353.61	457.314	943.141	618.937	959.762	1189.87	729.656	-0.705513	0.175247	0.680167	C10orf55	chromosome 10 open reading frame 55 [Source:HGNC Symbol;Acc:HGNC:31008]
ENSG00000257105	11.4329	13.261	30.7215	52.0083	1.0609	12.6868	20.1952	14.4051	25.9854	0.851123	0.17538	0.680167	AC006581.1	novel transcript
ENSG00000140395	24.7712	26.522	26.0667	33.1777	8.48721	23.5613	23.7643	19.775	27.7537	0.488998	0.175399	0.680167	WDR61	WD repeat domain 61 [Source:HGNC Symbol;Acc:HGNC:30300]
ENSG00000175832	8.57465	8.43881	11.1714	5.38017	12.7308	6.34342	8.77322	10.8256	6.7208	-0.687746	0.175486	0.680167	ETV4	ETS variant transcription factor 4 [Source:HGNC Symbol;Acc:HGNC:3493]
ENSG00000123453	3.81096	0	0.930953	0	1.0609	0	0.967135	1.93427	0	NA	0.175613	0.680167	SARDH	sarcosine dehydrogenase [Source:HGNC Symbol;Acc:HGNC:10536]
ENSG00000172340	3.81096	0	0.930953	0	1.0609	0	0.967135	1.93427	0	NA	0.175613	0.680167	SUCLG2	succinate-CoA ligase GDP-forming beta subunit [Source:HGNC Symbol;Acc:HGNC:11450]
ENSG00000204463	7.62191	0	1.86191	0	2.1218	0	1.93427	3.86854	0	NA	0.175613	0.680167	BAG6	BCL2 associated athanogene 6 [Source:HGNC Symbol;Acc:HGNC:13919]
ENSG00000146904	427.78	391.802	356.555	216.103	775.519	473.038	440.133	519.951	360.314	-0.529119	0.175697	0.680167	EPHA1	EPH receptor A1 [Source:HGNC Symbol;Acc:HGNC:3385]
ENSG00000172530	2.85822	0	1.86191	0	1.0609	0.906203	1.11454	1.92701	0.302068	-2.67342	0.17577	0.680167	BANP	BTG3 associated nuclear protein [Source:HGNC Symbol;Acc:HGNC:13450]
ENSG00000177706	2.85822	0	1.86191	0	1.0609	0.906203	1.11454	1.92701	0.302068	-2.67342	0.17577	0.680167	FAM20C	FAM20C golgi associated secretory pathway kinase [Source:HGNC Symbol;Acc:HGNC:22140]
ENSG00000117859	740.278	607.594	691.698	566.711	1069.39	575.439	708.518	833.788	583.248	-0.515571	0.175803	0.680167	OSBPL9	oxysterol binding protein like 9 [Source:HGNC Symbol;Acc:HGNC:16386]
ENSG00000004700	6.66917	15.6721	13.9643	26.9008	8.48721	9.06203	13.4593	9.70689	17.2117	0.826304	0.17581	0.680167	RECQL	RecQ like helicase [Source:HGNC Symbol;Acc:HGNC:9948]
ENSG00000197646	4.7637	6.02772	6.51667	8.96695	2.1218	9.06203	6.24315	4.46739	8.0189	0.843972	0.17628	0.680167	PDCD1LG2	programmed cell death 1 ligand 2 [Source:HGNC Symbol;Acc:HGNC:18731]
ENSG00000178597	0.952739	1.20554	0.930953	4.48347	1.0609	6.34342	2.49617	0.981531	4.01081	2.03079	0.176442	0.680167	PSAPL1	prosaposin like 1 (gene/pseudogene) [Source:HGNC Symbol;Acc:HGNC:33131]
ENSG00000225230	3.81096	4.82218	0	1.79339	1.0609	6.34342	2.97181	1.62395	4.31966	1.41141	0.176459	0.680167	AC008937.1	novel transcript
ENSG00000064601	385.859	389.391	107.991	233.141	56.2277	154.961	221.262	183.359	259.164	0.499193	0.17654	0.680167	CTSA	cathepsin A [Source:HGNC Symbol;Acc:HGNC:9251]
ENSG00000008382	8.57465	1.20554	3.72381	3.58678	14.8526	8.15583	6.6832	9.05036	4.31605	-1.06826	0.176567	0.680167	MPND	MPN domain containing [Source:HGNC Symbol;Acc:HGNC:25934]
ENSG00000261465	0.952739	0	8.37858	2.69008	2.1218	0	2.3572	3.81771	0.896695	-2.09002	0.176757	0.680167	AC099518.4	novel transcript, antisense to TMC7 and COQ7
ENSG00000105176	0.952739	0	0.930953	0.896695	2.1218	0.906203	0.968065	1.33516	0.600966	-1.15166	0.176834	0.680167	URI1	URI1 prefoldin like chaperone [Source:HGNC Symbol;Acc:HGNC:13236]
ENSG00000161149	0.952739	0	0.930953	0.896695	2.1218	0.906203	0.968065	1.33516	0.600966	-1.15166	0.176834	0.680167	TUBA3FP	tubulin alpha 3f pseudogene [Source:HGNC Symbol;Acc:HGNC:24067]
ENSG00000203485	3.81096	4.82218	1.86191	8.07025	1.0609	12.6868	5.38551	2.24459	8.52643	1.92549	0.176876	0.680167	INF2	inverted formin, FH2 and WH2 domain containing [Source:HGNC Symbol;Acc:HGNC:23791]
ENSG00000132382	57.1643	51.8384	61.4429	51.1116	62.5931	61.6218	57.6287	60.4001	54.8573	-0.138869	0.176899	0.680167	MYBBP1A	MYB binding protein 1a [Source:HGNC Symbol;Acc:HGNC:7546]
ENSG00000160211	8.57465	0	3.72381	3.58678	10.609	1.81241	4.71778	7.63582	1.79973	-2.085	0.177181	0.680167	G6PD	glucose-6-phosphate dehydrogenase [Source:HGNC Symbol;Acc:HGNC:4057]
ENSG00000116191	9.52739	44.6051	13.0333	83.3926	13.7917	20.8427	30.8655	12.1175	49.6135	2.03364	0.177225	0.680167	RALGPS2	Ral GEF with PH domain and SH3 binding motif 2 [Source:HGNC Symbol;Acc:HGNC:30279]
ENSG00000260017	377.285	274.864	351.9	326.397	312.966	285.454	321.478	347.384	295.572	-0.233021	0.177253	0.680167	AC138811.1	novel transcript, antisense to SMG1
ENSG00000233672	7.62191	37.3719	10.2405	14.3471	13.7917	26.2799	18.2755	10.5514	25.9996	1.30106	0.177337	0.680167	RNASEH2B-AS1	RNASEH2B antisense RNA 1 [Source:HGNC Symbol;Acc:HGNC:39967]
ENSG00000109339	3.81096	2.41109	2.79286	2.69008	2.1218	0	2.30447	2.90854	1.70039	-0.774428	0.177466	0.680167	MAPK10	mitogen-activated protein kinase 10 [Source:HGNC Symbol;Acc:HGNC:6872]
ENSG00000111846	1.90548	0	1.86191	1.79339	3.1827	1.81241	1.75931	2.3167	1.20193	-0.946713	0.177683	0.680167	GCNT2	glucosaminyl (N-acetyl) transferase 2 (I blood group) [Source:HGNC Symbol;Acc:HGNC:4204]
ENSG00000125459	8.57465	6.02772	12.1024	9.86364	13.7917	4.53102	9.14852	11.4896	6.80746	-0.755138	0.177686	0.680167	MSTO1	misato mitochondrial distribution and morphology regulator 1 [Source:HGNC Symbol;Acc:HGNC:29678]
ENSG00000185758	13.3383	9.64436	18.6191	7.17356	9.54811	7.24963	10.9288	13.8352	8.02251	-0.786214	0.177769	0.680167	CLDN24	claudin 24 [Source:HGNC Symbol;Acc:HGNC:37200]
ENSG00000188383	1.90548	0	0.930953	0.896695	2.1218	0	0.975821	1.65274	0.298898	-2.46714	0.177803	0.680167	GPAT2P2	glycerol-3-phosphate acyltransferase 2 pseudogene 2 [Source:HGNC Symbol;Acc:HGNC:52331]
ENSG00000188786	1.90548	0	0.930953	0.896695	2.1218	0	0.975821	1.65274	0.298898	-2.46714	0.177803	0.680167	MTF1	metal regulatory transcription factor 1 [Source:HGNC Symbol;Acc:HGNC:7428]
ENSG00000271984	751.711	969.258	714.972	726.323	617.444	756.68	756.065	694.709	817.42	0.234669	0.177909	0.680167	AL008726.1	novel transcript, antisense to CTSA
ENSG00000215086	2.85822	2.41109	2.79286	0	1.0609	0	1.52051	2.23733	0.803696	-1.47705	0.178005	0.680167	NPM1P24	nucleophosmin 1 pseudogene 24 [Source:HGNC Symbol;Acc:HGNC:45097]
ENSG00000155659	9.52739	2.41109	6.51667	1.79339	25.4616	2.71861	8.07146	13.8352	2.3077	-2.58382	0.178138	0.680167	VSIG4	V-set and immunoglobulin domain containing 4 [Source:HGNC Symbol;Acc:HGNC:17032]
ENSG00000119185	2.85822	9.64436	0.930953	4.48347	2.1218	2.71861	3.7929	1.97032	5.61548	1.51098	0.178237	0.680167	ITGB1BP1	integrin subunit beta 1 binding protein 1 [Source:HGNC Symbol;Acc:HGNC:23927]
ENSG00000279073	2.85822	2.41109	8.37858	0.896695	6.3654	1.81241	3.78706	5.8674	1.70673	-1.78149	0.178255	0.680167	AL807752.6	novel protein
ENSG00000224490	338.222	342.375	349.107	402.616	375.559	458.539	377.736	354.296	401.176	0.179281	0.178343	0.680167	TTC21B-AS1	TTC21B antisense RNA 1 [Source:HGNC Symbol;Acc:HGNC:41115]
ENSG00000109466	7.62191	0	8.37858	3.58678	26.5225	2.71861	8.13807	14.1743	2.1018	-2.75359	0.178365	0.680167	KLHL2	kelch like family member 2 [Source:HGNC Symbol;Acc:HGNC:6353]
ENSG00000253330	14.2911	14.4665	13.0333	26.9008	10.609	24.4675	17.2947	12.6445	21.945	0.795382	0.17837	0.680167	AC024451.2	NSFL1 (p97) cofactor (p47) (NSFL1C) pseudogene
ENSG00000108107	274.389	171.187	176.881	143.471	246.129	225.645	206.284	232.466	180.101	-0.368215	0.178388	0.680167	RPL28	ribosomal protein L28 [Source:HGNC Symbol;Acc:HGNC:10330]
ENSG00000240970	11.4329	25.3164	18.6191	35.8678	22.2789	22.6551	22.695	17.4436	27.9464	0.679965	0.178542	0.680167	RPL23AP64	ribosomal protein L23a pseudogene 64 [Source:HGNC Symbol;Acc:HGNC:36552]
ENSG00000149679	1.90548	2.41109	0	2.69008	0	0.906203	1.31881	0.635159	2.00246	1.65658	0.178637	0.680167	CABLES2	Cdk5 and Abl enzyme substrate 2 [Source:HGNC Symbol;Acc:HGNC:16143]
ENSG00000152359	1.90548	2.41109	0	2.69008	0	0.906203	1.31881	0.635159	2.00246	1.65658	0.178637	0.680167	POC5	POC5 centriolar protein [Source:HGNC Symbol;Acc:HGNC:26658]
ENSG00000150337	12.3856	0	5.58572	0	38.1924	4.53102	10.1158	18.7213	1.51034	-3.63173	0.178784	0.680167	FCGR1A	Fc fragment of IgG receptor Ia [Source:HGNC Symbol;Acc:HGNC:3613]
ENSG00000234263	110.518	101.266	113.576	74.4257	151.709	67.9652	103.243	125.268	81.2189	-0.625126	0.17879	0.680167	MAP3K5-AS1	MAP3K5 antisense RNA 1 [Source:HGNC Symbol;Acc:HGNC:40358]
ENSG00000225243	7.62191	26.522	9.30953	39.4546	13.7917	15.4055	18.6842	10.2411	27.1273	1.40538	0.178812	0.680167	AL021026.1	novel transcript, antisense to FMO2
ENSG00000258268	2.85822	0	1.86191	1.79339	5.3045	1.81241	2.27174	3.34154	1.20193	-1.47516	0.17887	0.680167	NA	NA
ENSG00000272921	5.71643	6.02772	0	5.38017	2.1218	9.96823	4.86906	2.61275	7.12538	1.4474	0.178886	0.680167	AC005832.4	novel protein
ENSG00000101331	7.62191	2.41109	2.79286	2.69008	4.2436	0	3.29326	4.88612	1.70039	-1.52282	0.179009	0.680167	CCM2L	CCM2 like scaffold protein [Source:HGNC Symbol;Acc:HGNC:16153]
ENSG00000256056	7.62191	7.23327	6.51667	3.58678	8.48721	7.24963	6.78258	7.54193	6.02322	-0.324398	0.179055	0.680167	AC087257.2	chromosome 12 open reading frame 71 (C12orf71) pseudogene
ENSG00000261373	201.981	48.2218	65.1667	61.8719	244.007	58.9032	113.359	170.385	56.3323	-1.59676	0.179146	0.680167	VPS9D1-AS1	VPS9D1 antisense RNA 1 [Source:HGNC Symbol;Acc:HGNC:48915]
ENSG00000020633	3.81096	2.41109	10.2405	0	4.2436	0	3.45102	6.09835	0.803696	-2.9237	0.179215	0.680167	RUNX3	RUNX family transcription factor 3 [Source:HGNC Symbol;Acc:HGNC:10473]
ENSG00000173918	2.85822	3.61663	1.86191	8.96695	10.609	22.6551	8.42797	5.10971	11.7462	1.20088	0.179289	0.680167	C1QTNF1	C1q and TNF related 1 [Source:HGNC Symbol;Acc:HGNC:14324]
ENSG00000106823	35.2513	34.9608	64.2358	40.3513	61.5322	39.8729	46.0341	53.6731	38.395	-0.483281	0.179307	0.680167	ECM2	extracellular matrix protein 2 [Source:HGNC Symbol;Acc:HGNC:3154]
ENSG00000042781	9.52739	9.64436	18.6191	26.0042	4.2436	12.6868	13.4542	10.7967	16.1118	0.577528	0.179346	0.680167	USH2A	usherin [Source:HGNC Symbol;Acc:HGNC:12601]
ENSG00000266978	1097.56	865.581	674.941	324.604	1576.5	450.383	831.594	1116.33	546.856	-1.02953	0.179366	0.680167	AC011511.2	novel transcript, antisense to MRPL4 and ICAM1
ENSG00000118976	19.0548	19.2887	21.4119	26.0042	23.3398	29.9047	23.1673	21.2688	25.0659	0.236982	0.179466	0.680167	OTUD4P1	OTUD4 pseudogene 1 [Source:HGNC Symbol;Acc:HGNC:33912]
ENSG00000138185	1.90548	1.20554	2.79286	0.896695	2.1218	1.81241	1.78913	2.27338	1.30488	-0.800919	0.179619	0.680167	ENTPD1	ectonucleoside triphosphate diphosphohydrolase 1 [Source:HGNC Symbol;Acc:HGNC:3363]
ENSG00000133246	3.81096	1.20554	0.930953	0.896695	3.1827	0.906203	1.82218	2.64154	1.00281	-1.39732	0.179674	0.680167	PRAM1	PML-RARA regulated adaptor molecule 1 [Source:HGNC Symbol;Acc:HGNC:30091]
ENSG00000174672	2.85822	1.20554	1.86191	1.79339	3.1827	0.906203	1.96799	2.63428	1.30171	-1.017	0.179785	0.680167	BRSK2	BR serine/threonine kinase 2 [Source:HGNC Symbol;Acc:HGNC:11405]
ENSG00000259429	1716.84	2162.75	3775.95	5524.54	1529.82	1975.52	2780.9	2340.87	3220.94	0.460437	0.179933	0.680167	UBE2Q2P2	ubiquitin conjugating enzyme E2 Q2 pseudogene 2 [Source:HGNC Symbol;Acc:HGNC:37440]
ENSG00000100097	2.85822	0	0.930953	0.896695	3.1827	0	1.31143	2.32396	0.298898	-2.95886	0.180081	0.680167	LGALS1	galectin 1 [Source:HGNC Symbol;Acc:HGNC:6561]
ENSG00000182463	1.90548	0	0.930953	0.896695	3.1827	0.906203	1.30367	2.00638	0.600966	-1.73924	0.18009	0.680167	TSHZ2	teashirt zinc finger homeobox 2 [Source:HGNC Symbol;Acc:HGNC:13010]
ENSG00000228599	5.71643	6.02772	3.72381	13.4504	8.48721	15.4055	8.80184	5.97582	11.6279	0.960378	0.180104	0.680167	RPL7P52	ribosomal protein L7 pseudogene 52 [Source:HGNC Symbol;Acc:HGNC:35676]
ENSG00000271383	4.7637	6.02772	0.930953	29.5909	2.1218	20.8427	10.713	2.60548	18.8204	2.85268	0.180136	0.680167	NBPF19	NBPF member 19 [Source:HGNC Symbol;Acc:HGNC:31999]
ENSG00000170382	6.66917	0	1.86191	1.79339	12.7308	5.43722	4.74875	7.0873	2.4102	-1.55608	0.180336	0.680167	LRRN2	leucine rich repeat neuronal 2 [Source:HGNC Symbol;Acc:HGNC:16914]
ENSG00000279569	33.3459	68.716	60.5119	86.0827	48.8014	49.8412	57.8832	47.5531	68.2133	0.520514	0.180338	0.680167	AC020763.4	novel transcript
ENSG00000155465	20.0075	21.6998	35.3762	70.8389	31.827	54.3722	39.0203	29.0703	48.9703	0.752363	0.180439	0.680167	SLC7A7	solute carrier family 7 member 7 [Source:HGNC Symbol;Acc:HGNC:11065]
ENSG00000274767	1251.9	731.766	23.2738	3.58678	446.639	94.2451	425.235	573.937	276.532	-1.05344	0.180497	0.680167	AC243829.1	novel transcript, antisense CCL3L3
ENSG00000130822	23.8185	18.0832	30.7215	30.4876	29.7052	21.7489	25.7608	28.0817	23.4399	-0.260665	0.180508	0.680167	PNCK	pregnancy up-regulated nonubiquitous CaM kinase [Source:HGNC Symbol;Acc:HGNC:13415]
ENSG00000100906	4.7637	1.20554	0.930953	0.896695	3.1827	0	1.82993	2.95912	0.700746	-2.0782	0.180645	0.680167	NFKBIA	NFKB inhibitor alpha [Source:HGNC Symbol;Acc:HGNC:7797]
ENSG00000100997	168.635	195.298	132.195	203.55	152.77	164.023	169.412	151.2	187.624	0.311383	0.180682	0.680167	ABHD12	abhydrolase domain containing 12 [Source:HGNC Symbol;Acc:HGNC:15868]
ENSG00000267219	124.809	78.3604	109.852	89.6695	107.151	101.495	101.889	113.937	89.8415	-0.342787	0.181	0.680167	AC010504.1	novel transcript, antisense to KIAA0355
ENSG00000233044	69.55	104.882	98.681	100.43	97.6029	119.619	98.4608	88.6113	108.31	0.289609	0.181133	0.680167	AL049820.1	novel transcript
ENSG00000230188	1.90548	0	2.79286	1.79339	1.0609	0.906203	1.40981	1.91975	0.899864	-1.09314	0.181139	0.680167	AL158156.1	ribosomal protein L21 (RPL21) pseudogene
ENSG00000146722	6.66917	22.9053	22.3429	27.7975	16.9744	19.9365	19.4376	15.3288	23.5465	0.619263	0.181153	0.680167	AC211486.1	FK506 binding protein 6, 36kDa (FKBP6 ) pseudogene
ENSG00000141499	23.8185	24.1109	14.8952	17.9339	8.48721	9.96823	16.5357	15.7336	17.3377	0.140058	0.181174	0.680167	WRAP53	WD repeat containing antisense to TP53 [Source:HGNC Symbol;Acc:HGNC:25522]
ENSG00000235426	27.6294	33.7552	30.7215	31.3843	32.8879	43.4978	33.3127	30.4129	36.2124	0.2518	0.181281	0.680167	AL133481.1	novel transcript
ENSG00000255157	4.7637	12.0554	1.86191	22.4174	1.0609	4.53102	7.78172	2.56217	13.0013	2.34322	0.181289	0.680167	DEFB130C	defensin beta 130C (pseudogene) [Source:HGNC Symbol;Acc:HGNC:43843]
ENSG00000213222	39.0623	37.3719	43.7548	19.7273	83.8112	46.2164	44.9906	55.5428	34.4385	-0.689576	0.181315	0.680167	AC093724.1	translocase of outer mitochondrial membrane 40 (TOMM40) pseudogene
ENSG00000141699	135.289	130.199	98.681	98.6364	113.516	107.838	114.027	115.829	112.224	-0.0456065	0.181356	0.680167	RETREG3	reticulophagy regulator family member 3 [Source:HGNC Symbol;Acc:HGNC:27258]
ENSG00000234450	2.85822	0	0.930953	0.896695	4.2436	0.906203	1.63928	2.67759	0.600966	-2.15558	0.181458	0.680167	AC005534.2	ribosomal protein L26-like 1 (RPL26L1) pseudogene
ENSG00000237298	883.189	1030.74	1000.77	2117.1	823.259	1284.09	1189.86	902.408	1477.31	0.711121	0.181578	0.680167	TTN-AS1	TTN antisense RNA 1 [Source:HGNC Symbol;Acc:HGNC:44124]
ENSG00000167419	40.015	44.6051	52.1334	63.6653	46.6796	77.0273	54.021	46.276	61.7659	0.416546	0.181727	0.680167	LPO	lactoperoxidase [Source:HGNC Symbol;Acc:HGNC:6678]
ENSG00000155926	13.3383	13.261	20.481	4.48347	28.6443	11.7806	15.3315	20.8212	9.8417	-1.08107	0.18187	0.680167	SLA	Src like adaptor [Source:HGNC Symbol;Acc:HGNC:10902]
ENSG00000141458	212.461	210.97	275.562	206.24	310.844	222.02	239.683	266.289	213.077	-0.32162	0.182076	0.680167	NPC1	NPC intracellular cholesterol transporter 1 [Source:HGNC Symbol;Acc:HGNC:7897]
ENSG00000102104	12.3856	2.41109	1.86191	1.79339	10.609	1.81241	5.14557	8.28551	2.00563	-2.04654	0.182143	0.680167	RS1	retinoschisin 1 [Source:HGNC Symbol;Acc:HGNC:10457]
ENSG00000258380	5.71643	13.261	13.0333	15.2438	13.7917	15.4055	12.742	10.8472	14.6368	0.432278	0.18215	0.680167	AL356805.1	novel transcript, antisense to FOXN3
ENSG00000213713	19.0548	15.6721	18.6191	10.7603	12.7308	11.7806	14.7696	16.8016	12.7377	-0.399491	0.182334	0.680167	PIGCP1	phosphatidylinositol glycan anchor biosynthesis class C pseudogene 1 [Source:HGNC Symbol;Acc:HGNC:8961]
ENSG00000258766	2.85822	1.20554	2.79286	0	1.0609	0.906203	1.47062	2.23733	0.703916	-1.6683	0.182509	0.680167	DIO2-AS1	DIO2 antisense RNA 1 [Source:HGNC Symbol;Acc:HGNC:44153]
ENSG00000216867	0.952739	0	1.86191	0	1.0609	0.906203	0.796958	1.29185	0.302068	-2.09649	0.182561	0.680167	RPL22P12	ribosomal protein L22 pseudogene 12 [Source:HGNC Symbol;Acc:HGNC:36345]
ENSG00000270075	0.952739	0	1.86191	0	1.0609	0.906203	0.796958	1.29185	0.302068	-2.09649	0.182561	0.680167	AL162742.1	novel transcript, antisense to ITPRIP
ENSG00000259598	13.3383	3.61663	5.58572	5.38017	18.0353	5.43722	8.56557	12.3198	4.81134	-1.35647	0.182811	0.680167	AC116158.2	novel transcript, antisense to RASGRP1
ENSG00000110717	1.90548	1.20554	13.0333	0	9.54811	1.81241	4.58415	8.16231	1.00598	-3.02037	0.183043	0.680167	NDUFS8	NADH:ubiquinone oxidoreductase core subunit S8 [Source:HGNC Symbol;Acc:HGNC:7715]
ENSG00000108557	4.7637	4.82218	0.930953	4.48347	0	2.71861	2.95315	1.89822	4.00809	1.07827	0.18315	0.680167	RAI1	retinoic acid induced 1 [Source:HGNC Symbol;Acc:HGNC:9834]
ENSG00000223864	2.85822	0	0.930953	0.896695	3.1827	0.906203	1.46246	2.32396	0.600966	-1.95123	0.183316	0.680167	NPM1P19	nucleophosmin 1 pseudogene 19 [Source:HGNC Symbol;Acc:HGNC:7921]
ENSG00000214248	28.5822	28.9331	21.4119	28.6942	19.0962	29.9047	26.1037	23.0301	29.1773	0.341327	0.183336	0.680167	AC010336.1	novel transcript, antisense to LRRC8E
ENSG00000270050	162.918	227.848	203.879	204.446	134.734	212.052	190.98	167.177	214.782	0.361495	0.183349	0.680167	AL035427.1	novel transcript, antisense to ARMCX5 and GPRASP1
ENSG00000171314	25.724	18.0832	15.8262	5.38017	20.1571	19.9365	17.5178	20.5691	14.4666	-0.507752	0.183426	0.680167	PGAM1	phosphoglycerate mutase 1 [Source:HGNC Symbol;Acc:HGNC:8888]
ENSG00000099381	1.90548	0	2.79286	0.896695	0	0	0.932505	1.56611	0.298898	-2.38946	0.183506	0.680167	SETD1A	SET domain containing 1A, histone lysine methyltransferase [Source:HGNC Symbol;Acc:HGNC:29010]
ENSG00000101160	1.90548	0	2.79286	0.896695	0	0	0.932505	1.56611	0.298898	-2.38946	0.183506	0.680167	CTSZ	cathepsin Z [Source:HGNC Symbol;Acc:HGNC:2547]
ENSG00000173805	1.90548	0	2.79286	0.896695	0	0	0.932505	1.56611	0.298898	-2.38946	0.183506	0.680167	HAP1	huntingtin associated protein 1 [Source:HGNC Symbol;Acc:HGNC:4812]
ENSG00000257043	1.90548	0	2.79286	0.896695	0	0	0.932505	1.56611	0.298898	-2.38946	0.183506	0.680167	AP006296.1	serine/arginine-rich splicing factor 3 (SRSF3) pseudogene
ENSG00000183578	0	3.61663	0	3.58678	0	0	1.20057	0	2.40114	NA	0.18351	0.680167	TNFAIP8L3	TNF alpha induced protein 8 like 3 [Source:HGNC Symbol;Acc:HGNC:20620]
ENSG00000227791	0	3.61663	0	3.58678	0	0	1.20057	0	2.40114	NA	0.18351	0.680167	AC007365.2	ribosomal protein S10 (RPS10) pseudogene
ENSG00000011405	0	0	0	0.896695	0	0.906203	0.300483	0	0.600966	NA	0.183515	0.680167	PIK3C2A	phosphatidylinositol-4-phosphate 3-kinase catalytic subunit type 2 alpha [Source:HGNC Symbol;Acc:HGNC:8971]
ENSG00000041353	0	0	0	0.896695	0	0.906203	0.300483	0	0.600966	NA	0.183515	0.680167	RAB27B	RAB27B, member RAS oncogene family [Source:HGNC Symbol;Acc:HGNC:9767]
ENSG00000060656	0	0	0	2.69008	0	2.71861	0.901449	0	1.8029	NA	0.183515	0.680167	PTPRU	protein tyrosine phosphatase receptor type U [Source:HGNC Symbol;Acc:HGNC:9683]
ENSG00000079308	0	0	0	0.896695	0	0.906203	0.300483	0	0.600966	NA	0.183515	0.680167	TNS1	tensin 1 [Source:HGNC Symbol;Acc:HGNC:11973]
ENSG00000087301	0	0	0	1.79339	0	1.81241	0.600966	0	1.20193	NA	0.183515	0.680167	TXNDC16	thioredoxin domain containing 16 [Source:HGNC Symbol;Acc:HGNC:19965]
ENSG00000090971	0	0	0	0.896695	0	0.906203	0.300483	0	0.600966	NA	0.183515	0.680167	NAT14	N-acetyltransferase 14 (putative) [Source:HGNC Symbol;Acc:HGNC:28918]
ENSG00000099769	0	0	0	0.896695	0	0.906203	0.300483	0	0.600966	NA	0.183515	0.680167	IGFALS	insulin like growth factor binding protein acid labile subunit [Source:HGNC Symbol;Acc:HGNC:5468]
ENSG00000101391	0	0	0	0.896695	0	0.906203	0.300483	0	0.600966	NA	0.183515	0.680167	CDK5RAP1	CDK5 regulatory subunit associated protein 1 [Source:HGNC Symbol;Acc:HGNC:15880]
ENSG00000101413	0	0	0	0.896695	0	0.906203	0.300483	0	0.600966	NA	0.183515	0.680167	RPRD1B	regulation of nuclear pre-mRNA domain containing 1B [Source:HGNC Symbol;Acc:HGNC:16209]
ENSG00000102763	0	0	0	0.896695	0	0.906203	0.300483	0	0.600966	NA	0.183515	0.680167	VWA8	von Willebrand factor A domain containing 8 [Source:HGNC Symbol;Acc:HGNC:29071]
ENSG00000104643	0	0	0	0.896695	0	0.906203	0.300483	0	0.600966	NA	0.183515	0.680167	MTMR9	myotubularin related protein 9 [Source:HGNC Symbol;Acc:HGNC:14596]
ENSG00000104969	0	0	0	0.896695	0	0.906203	0.300483	0	0.600966	NA	0.183515	0.680167	SGTA	small glutamine rich tetratricopeptide repeat containing alpha [Source:HGNC Symbol;Acc:HGNC:10819]
ENSG00000105518	0	0	0	0.896695	0	0.906203	0.300483	0	0.600966	NA	0.183515	0.680167	TMEM205	transmembrane protein 205 [Source:HGNC Symbol;Acc:HGNC:29631]
ENSG00000107165	0	0	0	2.69008	0	2.71861	0.901449	0	1.8029	NA	0.183515	0.680167	TYRP1	tyrosinase related protein 1 [Source:HGNC Symbol;Acc:HGNC:12450]
ENSG00000108179	0	0	0	1.79339	0	1.81241	0.600966	0	1.20193	NA	0.183515	0.680167	PPIF	peptidylprolyl isomerase F [Source:HGNC Symbol;Acc:HGNC:9259]
ENSG00000111788	0	0	0	3.58678	0	3.62481	1.20193	0	2.40386	NA	0.183515	0.680167	AC009533.1	DEAD/H (Asp-Glu-Ala-Asp/His) box polypeptide like pseudogene
ENSG00000112319	0	0	0	0.896695	0	0.906203	0.300483	0	0.600966	NA	0.183515	0.680167	EYA4	EYA transcriptional coactivator and phosphatase 4 [Source:HGNC Symbol;Acc:HGNC:3522]
ENSG00000116209	0	0	0	0.896695	0	0.906203	0.300483	0	0.600966	NA	0.183515	0.680167	TMEM59	transmembrane protein 59 [Source:HGNC Symbol;Acc:HGNC:1239]
ENSG00000116396	0	0	0	1.79339	0	1.81241	0.600966	0	1.20193	NA	0.183515	0.680167	KCNC4	potassium voltage-gated channel subfamily C member 4 [Source:HGNC Symbol;Acc:HGNC:6236]
ENSG00000117592	0	0	0	0.896695	0	0.906203	0.300483	0	0.600966	NA	0.183515	0.680167	PRDX6	peroxiredoxin 6 [Source:HGNC Symbol;Acc:HGNC:16753]
ENSG00000124334	0	0	0	0.896695	0	0.906203	0.300483	0	0.600966	NA	0.183515	0.680167	IL9R	interleukin 9 receptor [Source:HGNC Symbol;Acc:HGNC:6030]
ENSG00000125122	0	0	0	0.896695	0	0.906203	0.300483	0	0.600966	NA	0.183515	0.680167	LRRC29	leucine rich repeat containing 29 [Source:HGNC Symbol;Acc:HGNC:13605]
ENSG00000125246	0	0	0	2.69008	0	2.71861	0.901449	0	1.8029	NA	0.183515	0.680167	CLYBL	citrate lyase beta like [Source:HGNC Symbol;Acc:HGNC:18355]
ENSG00000125249	0	0	0	0.896695	0	0.906203	0.300483	0	0.600966	NA	0.183515	0.680167	RAP2A	RAP2A, member of RAS oncogene family [Source:HGNC Symbol;Acc:HGNC:9861]
ENSG00000130193	0	0	0	0.896695	0	0.906203	0.300483	0	0.600966	NA	0.183515	0.680167	THEM6	thioesterase superfamily member 6 [Source:HGNC Symbol;Acc:HGNC:29656]
ENSG00000130713	0	0	0	0.896695	0	0.906203	0.300483	0	0.600966	NA	0.183515	0.680167	EXOSC2	exosome component 2 [Source:HGNC Symbol;Acc:HGNC:17097]
ENSG00000131242	0	0	0	0.896695	0	0.906203	0.300483	0	0.600966	NA	0.183515	0.680167	RAB11FIP4	RAB11 family interacting protein 4 [Source:HGNC Symbol;Acc:HGNC:30267]
ENSG00000131462	0	0	0	0.896695	0	0.906203	0.300483	0	0.600966	NA	0.183515	0.680167	TUBG1	tubulin gamma 1 [Source:HGNC Symbol;Acc:HGNC:12417]
ENSG00000132591	0	0	0	2.69008	0	2.71861	0.901449	0	1.8029	NA	0.183515	0.680167	ERAL1	Era like 12S mitochondrial rRNA chaperone 1 [Source:HGNC Symbol;Acc:HGNC:3424]
ENSG00000133433	0	0	0	0.896695	0	0.906203	0.300483	0	0.600966	NA	0.183515	0.680167	GSTT2B	glutathione S-transferase theta 2B (gene/pseudogene) [Source:HGNC Symbol;Acc:HGNC:33437]
ENSG00000134874	0	0	0	0.896695	0	0.906203	0.300483	0	0.600966	NA	0.183515	0.680167	DZIP1	DAZ interacting zinc finger protein 1 [Source:HGNC Symbol;Acc:HGNC:20908]
ENSG00000137413	0	0	0	0.896695	0	0.906203	0.300483	0	0.600966	NA	0.183515	0.680167	TAF8	TATA-box binding protein associated factor 8 [Source:HGNC Symbol;Acc:HGNC:17300]
ENSG00000140527	0	0	0	0.896695	0	0.906203	0.300483	0	0.600966	NA	0.183515	0.680167	WDR93	WD repeat domain 93 [Source:HGNC Symbol;Acc:HGNC:26924]
ENSG00000140694	0	0	0	0.896695	0	0.906203	0.300483	0	0.600966	NA	0.183515	0.680167	PARN	poly(A)-specific ribonuclease [Source:HGNC Symbol;Acc:HGNC:8609]
ENSG00000142609	0	0	0	0.896695	0	0.906203	0.300483	0	0.600966	NA	0.183515	0.680167	CFAP74	cilia and flagella associated protein 74 [Source:HGNC Symbol;Acc:HGNC:29368]
ENSG00000145592	0	0	0	2.69008	0	2.71861	0.901449	0	1.8029	NA	0.183515	0.680167	RPL37	ribosomal protein L37 [Source:HGNC Symbol;Acc:HGNC:10347]
ENSG00000146857	0	0	0	2.69008	0	2.71861	0.901449	0	1.8029	NA	0.183515	0.680167	STRA8	stimulated by retinoic acid 8 [Source:HGNC Symbol;Acc:HGNC:30653]
ENSG00000149646	0	0	0	1.79339	0	1.81241	0.600966	0	1.20193	NA	0.183515	0.680167	CNBD2	cyclic nucleotide binding domain containing 2 [Source:HGNC Symbol;Acc:HGNC:16145]
ENSG00000152193	0	0	0	0.896695	0	0.906203	0.300483	0	0.600966	NA	0.183515	0.680167	OBI1	ORC ubiquitin ligase 1 [Source:HGNC Symbol;Acc:HGNC:20308]
ENSG00000155011	0	0	0	0.896695	0	0.906203	0.300483	0	0.600966	NA	0.183515	0.680167	DKK2	dickkopf WNT signaling pathway inhibitor 2 [Source:HGNC Symbol;Acc:HGNC:2892]
ENSG00000160404	0	0	0	0.896695	0	0.906203	0.300483	0	0.600966	NA	0.183515	0.680167	TOR2A	torsin family 2 member A [Source:HGNC Symbol;Acc:HGNC:11996]
ENSG00000161798	0	0	0	0.896695	0	0.906203	0.300483	0	0.600966	NA	0.183515	0.680167	AQP5	aquaporin 5 [Source:HGNC Symbol;Acc:HGNC:638]
ENSG00000162771	0	0	0	1.79339	0	1.81241	0.600966	0	1.20193	NA	0.183515	0.680167	FAM71A	family with sequence similarity 71 member A [Source:HGNC Symbol;Acc:HGNC:26541]
ENSG00000163590	0	0	0	1.79339	0	1.81241	0.600966	0	1.20193	NA	0.183515	0.680167	PPM1L	protein phosphatase, Mg2+/Mn2+ dependent 1L [Source:HGNC Symbol;Acc:HGNC:16381]
ENSG00000163848	0	0	0	0.896695	0	0.906203	0.300483	0	0.600966	NA	0.183515	0.680167	ZNF148	zinc finger protein 148 [Source:HGNC Symbol;Acc:HGNC:12933]
ENSG00000164049	0	0	0	0.896695	0	0.906203	0.300483	0	0.600966	NA	0.183515	0.680167	FBXW12	F-box and WD repeat domain containing 12 [Source:HGNC Symbol;Acc:HGNC:20729]
ENSG00000170381	0	0	0	0.896695	0	0.906203	0.300483	0	0.600966	NA	0.183515	0.680167	SEMA3E	semaphorin 3E [Source:HGNC Symbol;Acc:HGNC:10727]
ENSG00000171490	0	0	0	1.79339	0	1.81241	0.600966	0	1.20193	NA	0.183515	0.680167	RSL1D1	ribosomal L1 domain containing 1 [Source:HGNC Symbol;Acc:HGNC:24534]
ENSG00000172053	0	0	0	0.896695	0	0.906203	0.300483	0	0.600966	NA	0.183515	0.680167	QARS1	glutaminyl-tRNA synthetase 1 [Source:HGNC Symbol;Acc:HGNC:9751]
ENSG00000174007	0	0	0	0.896695	0	0.906203	0.300483	0	0.600966	NA	0.183515	0.680167	CEP19	centrosomal protein 19 [Source:HGNC Symbol;Acc:HGNC:28209]
ENSG00000174123	0	0	0	0.896695	0	0.906203	0.300483	0	0.600966	NA	0.183515	0.680167	TLR10	toll like receptor 10 [Source:HGNC Symbol;Acc:HGNC:15634]
ENSG00000174600	0	0	0	1.79339	0	1.81241	0.600966	0	1.20193	NA	0.183515	0.680167	CMKLR1	chemerin chemokine-like receptor 1 [Source:HGNC Symbol;Acc:HGNC:2121]
ENSG00000176055	0	0	0	1.79339	0	1.81241	0.600966	0	1.20193	NA	0.183515	0.680167	MBLAC2	metallo-beta-lactamase domain containing 2 [Source:HGNC Symbol;Acc:HGNC:33711]
ENSG00000178761	0	0	0	1.79339	0	1.81241	0.600966	0	1.20193	NA	0.183515	0.680167	FAM219B	family with sequence similarity 219 member B [Source:HGNC Symbol;Acc:HGNC:24695]
ENSG00000182158	0	0	0	0.896695	0	0.906203	0.300483	0	0.600966	NA	0.183515	0.680167	CREB3L2	cAMP responsive element binding protein 3 like 2 [Source:HGNC Symbol;Acc:HGNC:23720]
ENSG00000182749	0	0	0	0.896695	0	0.906203	0.300483	0	0.600966	NA	0.183515	0.680167	PAQR7	progestin and adipoQ receptor family member 7 [Source:HGNC Symbol;Acc:HGNC:23146]
ENSG00000183631	0	0	0	1.79339	0	1.81241	0.600966	0	1.20193	NA	0.183515	0.680167	PRR32	proline rich 32 [Source:HGNC Symbol;Acc:HGNC:34498]
ENSG00000183751	0	0	0	0.896695	0	0.906203	0.300483	0	0.600966	NA	0.183515	0.680167	TBL3	transducin beta like 3 [Source:HGNC Symbol;Acc:HGNC:11587]
ENSG00000184672	0	0	0	0.896695	0	0.906203	0.300483	0	0.600966	NA	0.183515	0.680167	RALYL	RALY RNA binding protein like [Source:HGNC Symbol;Acc:HGNC:27036]
ENSG00000186998	0	0	0	0.896695	0	0.906203	0.300483	0	0.600966	NA	0.183515	0.680167	EMID1	EMI domain containing 1 [Source:HGNC Symbol;Acc:HGNC:18036]
ENSG00000187902	0	0	0	0.896695	0	0.906203	0.300483	0	0.600966	NA	0.183515	0.680167	SHISA7	shisa family member 7 [Source:HGNC Symbol;Acc:HGNC:35409]
ENSG00000187994	0	0	0	1.79339	0	1.81241	0.600966	0	1.20193	NA	0.183515	0.680167	RINL	Ras and Rab interactor like [Source:HGNC Symbol;Acc:HGNC:24795]
ENSG00000196214	0	0	0	1.79339	0	1.81241	0.600966	0	1.20193	NA	0.183515	0.680167	ZNF766	zinc finger protein 766 [Source:HGNC Symbol;Acc:HGNC:28063]
ENSG00000197024	0	0	0	0.896695	0	0.906203	0.300483	0	0.600966	NA	0.183515	0.680167	ZNF398	zinc finger protein 398 [Source:HGNC Symbol;Acc:HGNC:18373]
ENSG00000197445	0	0	0	0.896695	0	0.906203	0.300483	0	0.600966	NA	0.183515	0.680167	NA	NA
ENSG00000197550	0	0	0	0.896695	0	0.906203	0.300483	0	0.600966	NA	0.183515	0.680167	AL359955.1	zinc finger pseudogene
ENSG00000197651	0	0	0	0.896695	0	0.906203	0.300483	0	0.600966	NA	0.183515	0.680167	CCER1	coiled-coil glutamate rich protein 1 [Source:HGNC Symbol;Acc:HGNC:28373]
ENSG00000204361	0	0	0	0.896695	0	0.906203	0.300483	0	0.600966	NA	0.183515	0.680167	NXPE2	neurexophilin and PC-esterase domain family member 2 [Source:HGNC Symbol;Acc:HGNC:26331]
ENSG00000205176	0	0	0	0.896695	0	0.906203	0.300483	0	0.600966	NA	0.183515	0.680167	REXO1L1P	REXO1 like 1, pseudogene [Source:HGNC Symbol;Acc:HGNC:24660]
ENSG00000205740	0	0	0	0.896695	0	0.906203	0.300483	0	0.600966	NA	0.183515	0.680167	AL359878.1	uncharacterized LOC107984285 [Source:NCBI gene;Acc:107984285]
ENSG00000205853	0	0	0	0.896695	0	0.906203	0.300483	0	0.600966	NA	0.183515	0.680167	RFPL3S	RFPL3 antisense [Source:HGNC Symbol;Acc:HGNC:9981]
ENSG00000211978	0	0	0	2.69008	0	2.71861	0.901449	0	1.8029	NA	0.183515	0.680167	IGHV5-78	immunoglobulin heavy variable 5-78 (pseudogene) [Source:HGNC Symbol;Acc:HGNC:5660]
ENSG00000213328	0	0	0	0.896695	0	0.906203	0.300483	0	0.600966	NA	0.183515	0.680167	AC104117.1	DCN1, defective in cullin neddylation 1, domain containing 3 (S. cerevisiae) (DCUN1D3) pseudogene
ENSG00000215120	0	0	0	0.896695	0	0.906203	0.300483	0	0.600966	NA	0.183515	0.680167	AL590763.2	suppressor of cytokine signaling 4 (SOCS4) pseudogene
ENSG00000222009	0	0	0	0.896695	0	0.906203	0.300483	0	0.600966	NA	0.183515	0.680167	BTBD19	BTB domain containing 19 [Source:HGNC Symbol;Acc:HGNC:27145]
ENSG00000223727	0	0	0	0.896695	0	0.906203	0.300483	0	0.600966	NA	0.183515	0.680167	AC034195.1	novel transcript
ENSG00000224310	0	0	0	0.896695	0	0.906203	0.300483	0	0.600966	NA	0.183515	0.680167	LINC01567	long intergenic non-protein coding RNA 1567 [Source:HGNC Symbol;Acc:HGNC:51367]
ENSG00000225752	0	0	0	0.896695	0	0.906203	0.300483	0	0.600966	NA	0.183515	0.680167	AL023581.1	novel transcript
ENSG00000227203	0	0	0	0.896695	0	0.906203	0.300483	0	0.600966	NA	0.183515	0.680167	SUB1P1	SUB1 pseudogene 1 [Source:HGNC Symbol;Acc:HGNC:32300]
ENSG00000229046	0	0	0	0.896695	0	0.906203	0.300483	0	0.600966	NA	0.183515	0.680167	HMGN1P2	high mobility group nucleosome binding domain 1 pseudogene 2 [Source:HGNC Symbol;Acc:HGNC:4985]
ENSG00000229105	0	0	0	0.896695	0	0.906203	0.300483	0	0.600966	NA	0.183515	0.680167	ASTN2-AS1	ASTN2 antisense RNA 1 [Source:HGNC Symbol;Acc:HGNC:51175]
ENSG00000229140	0	0	0	0.896695	0	0.906203	0.300483	0	0.600966	NA	0.183515	0.680167	CCDC26	CCDC26 long non-coding RNA [Source:HGNC Symbol;Acc:HGNC:28416]
ENSG00000230817	0	0	0	0.896695	0	0.906203	0.300483	0	0.600966	NA	0.183515	0.680167	LINC01362	long intergenic non-protein coding RNA 1362 [Source:HGNC Symbol;Acc:HGNC:50596]
ENSG00000232196	0	0	0	0.896695	0	0.906203	0.300483	0	0.600966	NA	0.183515	0.680167	MTRNR2L4	MT-RNR2 like 4 [Source:HGNC Symbol;Acc:HGNC:37161]
ENSG00000237128	0	0	0	0.896695	0	0.906203	0.300483	0	0.600966	NA	0.183515	0.680167	LINC02652	long intergenic non-protein coding RNA 2652 [Source:HGNC Symbol;Acc:HGNC:54137]
ENSG00000238042	0	0	0	0.896695	0	0.906203	0.300483	0	0.600966	NA	0.183515	0.680167	LINC02257	long intergenic non-protein coding RNA 2257 [Source:HGNC Symbol;Acc:HGNC:53159]
ENSG00000240654	0	0	0	0.896695	0	0.906203	0.300483	0	0.600966	NA	0.183515	0.680167	C1QTNF9	C1q and TNF related 9 [Source:HGNC Symbol;Acc:HGNC:28732]
ENSG00000241479	0	0	0	0.896695	0	0.906203	0.300483	0	0.600966	NA	0.183515	0.680167	MECOM-AS1	MECOM antisense RNA 1 [Source:HGNC Symbol;Acc:HGNC:40368]
ENSG00000242324	0	0	0	1.79339	0	1.81241	0.600966	0	1.20193	NA	0.183515	0.680167	AL049634.1	PTPNS (protein tyrosine phosphatase, non-receptor type substrate 1) protein family pseudogene
ENSG00000247372	0	0	0	3.58678	0	3.62481	1.20193	0	2.40386	NA	0.183515	0.680167	AC008897.2	novel transcript
ENSG00000248155	0	0	0	0.896695	0	0.906203	0.300483	0	0.600966	NA	0.183515	0.680167	CR545473.1	novel pseudogene
ENSG00000248640	0	0	0	0.896695	0	0.906203	0.300483	0	0.600966	NA	0.183515	0.680167	HNRNPA1P56	heterogeneous nuclear ribonucleoprotein A1 pseudogene 56 [Source:HGNC Symbol;Acc:HGNC:48786]
ENSG00000248676	0	0	0	0.896695	0	0.906203	0.300483	0	0.600966	NA	0.183515	0.680167	AC083902.1	novel transcript
ENSG00000253110	0	0	0	0.896695	0	0.906203	0.300483	0	0.600966	NA	0.183515	0.680167	AC011410.1	novel transcript
ENSG00000253554	0	0	0	1.79339	0	1.81241	0.600966	0	1.20193	NA	0.183515	0.680167	LINC01414	long intergenic non-protein coding RNA 1414 [Source:HGNC Symbol;Acc:HGNC:50707]
ENSG00000253649	0	0	0	0.896695	0	0.906203	0.300483	0	0.600966	NA	0.183515	0.680167	PRSS51	serine protease 51 [Source:HGNC Symbol;Acc:HGNC:37321]
ENSG00000253880	0	0	0	0.896695	0	0.906203	0.300483	0	0.600966	NA	0.183515	0.680167	AC009435.1	novel transcript
ENSG00000254948	0	0	0	1.79339	0	1.81241	0.600966	0	1.20193	NA	0.183515	0.680167	OR7E158P	olfactory receptor family 7 subfamily E member 158 pseudogene [Source:HGNC Symbol;Acc:HGNC:31232]
ENSG00000255084	0	0	0	0.896695	0	0.906203	0.300483	0	0.600966	NA	0.183515	0.680167	AP003110.1	novel transcript
ENSG00000255858	0	0	0	0.896695	0	0.906203	0.300483	0	0.600966	NA	0.183515	0.680167	AC055720.1	novel transcript
ENSG00000255946	0	0	0	0.896695	0	0.906203	0.300483	0	0.600966	NA	0.183515	0.680167	AC069234.1	novel transcript
ENSG00000256686	0	0	0	0.896695	0	0.906203	0.300483	0	0.600966	NA	0.183515	0.680167	AC019209.3	novel transcript
ENSG00000259485	0	0	0	1.79339	0	1.81241	0.600966	0	1.20193	NA	0.183515	0.680167	LINC02253	long intergenic non-protein coding RNA 2253 [Source:HGNC Symbol;Acc:HGNC:53151]
ENSG00000263327	0	0	0	0.896695	0	0.906203	0.300483	0	0.600966	NA	0.183515	0.680167	TAPT1-AS1	TAPT1 antisense RNA 1 (head to head) [Source:HGNC Symbol;Acc:HGNC:26832]
ENSG00000267317	0	0	0	0.896695	0	0.906203	0.300483	0	0.600966	NA	0.183515	0.680167	AC027307.2	novel transcript, antisense to APC2
ENSG00000267691	0	0	0	0.896695	0	0.906203	0.300483	0	0.600966	NA	0.183515	0.680167	SHC1P2	SHC adaptor protein 1 pseudogene 2 [Source:HGNC Symbol;Acc:HGNC:10842]
ENSG00000271380	0	0	0	0.896695	0	0.906203	0.300483	0	0.600966	NA	0.183515	0.680167	AL451085.3	uncharacterized LOC101928120 [Source:NCBI gene;Acc:101928120]
ENSG00000275506	0	0	0	0.896695	0	0.906203	0.300483	0	0.600966	NA	0.183515	0.680167	H3P25	H3 histone pseudogene 25 [Source:HGNC Symbol;Acc:HGNC:54459]
ENSG00000276531	0	0	0	0.896695	0	0.906203	0.300483	0	0.600966	NA	0.183515	0.680167	AC091769.1	sorting nexin 19 (SNX19) pseudogene
ENSG00000279897	0	0	0	1.79339	0	1.81241	0.600966	0	1.20193	NA	0.183515	0.680167	BIRC6-AS2	BIRC6 antisense RNA 2 [Source:HGNC Symbol;Acc:HGNC:50490]
ENSG00000139055	0.952739	0	1.86191	0.896695	0	0	0.618557	0.938215	0.298898	-1.65026	0.183521	0.680167	ERP27	endoplasmic reticulum protein 27 [Source:HGNC Symbol;Acc:HGNC:26495]
ENSG00000178015	0.952739	0	1.86191	0.896695	0	0	0.618557	0.938215	0.298898	-1.65026	0.183521	0.680167	GPR150	G protein-coupled receptor 150 [Source:HGNC Symbol;Acc:HGNC:23628]
ENSG00000221961	0.952739	0	1.86191	0.896695	0	0	0.618557	0.938215	0.298898	-1.65026	0.183521	0.680167	NA	NA
ENSG00000269313	0.952739	0	1.86191	0.896695	0	0	0.618557	0.938215	0.298898	-1.65026	0.183521	0.680167	MAGIX	MAGI family member, X-linked [Source:HGNC Symbol;Acc:HGNC:30006]
ENSG00000269964	0.952739	0	1.86191	0.896695	0	0	0.618557	0.938215	0.298898	-1.65026	0.183521	0.680167	MEI4	meiotic double-stranded break formation protein 4 [Source:HGNC Symbol;Acc:HGNC:43638]
ENSG00000237003	2.85822	0	2.79286	0	0	0	0.941846	1.88369	0	NA	0.183558	0.680167	AC126124.2	ribosomal protein L36a (RPL36A) pseudogene
ENSG00000040633	0.952739	0	0.930953	0	0	0	0.313949	0.627897	0	NA	0.183558	0.680167	PHF23	PHD finger protein 23 [Source:HGNC Symbol;Acc:HGNC:28428]
ENSG00000061794	0.952739	0	0.930953	0	0	0	0.313949	0.627897	0	NA	0.183558	0.680167	MRPS35	mitochondrial ribosomal protein S35 [Source:HGNC Symbol;Acc:HGNC:16635]
ENSG00000085365	0.952739	0	0.930953	0	0	0	0.313949	0.627897	0	NA	0.183558	0.680167	SCAMP1	secretory carrier membrane protein 1 [Source:HGNC Symbol;Acc:HGNC:10563]
ENSG00000087266	1.90548	0	1.86191	0	0	0	0.627897	1.25579	0	NA	0.183558	0.680167	SH3BP2	SH3 domain binding protein 2 [Source:HGNC Symbol;Acc:HGNC:10825]
ENSG00000102606	1.90548	0	1.86191	0	0	0	0.627897	1.25579	0	NA	0.183558	0.680167	ARHGEF7	Rho guanine nucleotide exchange factor 7 [Source:HGNC Symbol;Acc:HGNC:15607]
ENSG00000106070	0.952739	0	0.930953	0	0	0	0.313949	0.627897	0	NA	0.183558	0.680167	GRB10	growth factor receptor bound protein 10 [Source:HGNC Symbol;Acc:HGNC:4564]
ENSG00000108443	0.952739	0	0.930953	0	0	0	0.313949	0.627897	0	NA	0.183558	0.680167	RPS6KB1	ribosomal protein S6 kinase B1 [Source:HGNC Symbol;Acc:HGNC:10436]
[truncated: 19,379 more rows]
